# Supplementary material for: A cost-effective approach to DNA methylation detection by Methyl Sensitive DArT sequencing
Source: PLoS One. 2020 Jun 4;15(6):e0233800. doi: 10.1371/journal.pone.0233800 (PMC7272069; doi:10.1371/journal.pone.0233800)
Supplement: S2 File — (XLSX) [file pone.0233800.s012.xlsx]

## Sheet: Adult leaves
Gene name	Chromosome	Gene start	Gene end	Gene strand	Gene description	Annotation GO ID	Enzyme code	Enzyme description	Interpro signatures	Interpro GO ID	Interpro GO term	Interpro GO category	MSD-Methylated sites (When more than one, separated by comma)	Distance to genes in bp (When more than one, separated by comma)
Eucgr.A00211	Chr01	44231	61448	+	PTHR21493//PTHR21493:SF110 - CGI-141-RELATED/LIPASE CONTAINING PROTEIN // SUBFAMILY NOT NAMED (1 of 1) & sn1-specific diacylglycerol lipase beta isoform X2	GO:0006629 & GO:0016021 & GO:0016787	3.1.1.3	Triacylglycerol lipase.	G3DSA:3.40.50.1820 (GENE3D);PF01764 (PFAM);PTHR21493:SF110 (PANTHER);PTHR21493 (PANTHER);CYTOPLASMIC_DOMAIN (PHOBIUS);CYTOPLASMIC_DOMAIN (PHOBIUS);CYTOPLASMIC_DOMAIN (PHOBIUS);TRANSMEMBRANE (PHOBIUS);TRANSMEMBRANE (PHOBIUS);TRANSMEMBRANE (PHOBIUS);TRANSMEMBRANE (PHOBIUS);NON_CYTOPLASMIC_DOMAIN (PHOBIUS);NON_CYTOPLASMIC_DOMAIN (PHOBIUS);SSF53474 (SUPERFAMILY);TMhelix (TMHMM);TMhelix (TMHMM);TMheli…	GO:0006629	lipid metabolic process	Biological Process	MS-DArT_site_4	0
Eucgr.A00214	Chr01	81991	93470	-	K13181 - ATP-dependent RNA helicase DDX27 [EC:3.6.4.13] (DDX27, DRS1) (1 of 1) & DEAD-box ATP-dependent RNA helicase 28	GO:0005524, GO:0003676 & GO:0003676 & GO:0036464 & GO:0005524 & GO:0010468 & GO:0010501 & GO:0007059 & GO:0006413 & GO:0004004	3.6.4.13 & 3.6.1 & 3.6.1.3 & 2.7.7 & 3.6.1.15	RNA helicase. & Acting on acid anhydrides & Adenosinetriphosphatase & Transferring phosphorus-containing groups & Nucleoside-triphosphate phosphatase	Coil (COILS);Coil (COILS);Coil (COILS);SM00487 (SMART);SM00490 (SMART);G3DSA:3.40.50.300 (GENE3D);PF00271 (PFAM);PF00270 (PFAM);G3DSA:3.40.50.300 (GENE3D);PTHR24031 (PANTHER);PTHR24031:SF277 (PANTHER);PS00039 (PROSITE_PATTERNS);PS51195 (PROSITE_PROFILES);PS51194 (PROSITE_PROFILES);PS51192 (PROSITE_PROFILES);SSF52540 (SUPERFAMILY);SSF52540 (SUPERFAMILY)	GO:0005524/GO:0003676	ATP binding/nucleic acid binding	Molecular Function/Molecular Function	MS-DArT_site_10,MS-DArT_site_9	0,0
Eucgr.A00254	Chr01	733533	741526	-	PTHR10231:SF25 - UDP-SUGAR TRANSPORTER PROTEIN SLC35A4-RELATED (1 of 2) & CMP-sialic acid transporter 2	GO:0016021, GO:0008643, GO:0005351, GO:0000139 & GO:0015992 & GO:0016021 & GO:0008643 & GO:0005351 & GO:0000139			PIRSF005799 (PIRSF);PF04142 (PFAM);PTHR10231:SF25 (PANTHER);PTHR10231 (PANTHER);TRANSMEMBRANE (PHOBIUS);CYTOPLASMIC_DOMAIN (PHOBIUS);TRANSMEMBRANE (PHOBIUS);TRANSMEMBRANE (PHOBIUS);NON_CYTOPLASMIC_DOMAIN (PHOBIUS);TRANSMEMBRANE (PHOBIUS);TRANSMEMBRANE (PHOBIUS);NON_CYTOPLASMIC_DOMAIN (PHOBIUS);TRANSMEMBRANE (PHOBIUS);CYTOPLASMIC_DOMAIN (PHOBIUS);NON_CYTOPLASMIC_DOMAIN (PHOBIUS);NON_CYTOPLASMIC_DO…	GO:0005351/GO:0008643/GO:0000139/GO:0016021;GO:0005351/GO:0008643/GO:0000139/GO:0016021;GO:0005351/GO:0008643/GO:0000139/GO:0016021	sugar:proton symporter activity/carbohydrate transport/Golgi membrane/integral component of membrane;sugar:proton symporter activity/carbohydrate transport/Golgi membrane/integral component of membrane;sugar:proton symporter activity/carbohydrate transport/Golgi membrane/integral component of membrane	Molecular Function/Biological Process/Cellular Component/Cellular Component;Molecular Function/Biological Process/Cellular Component/Cellular Component;Molecular Function/Biological Process/Cellular Component/Cellular Component	MS-DArT_site_52	0
Eucgr.A00257	Chr01	756628	759837	+	PTHR11592:SF33 - GLUTATHIONE PEROXIDASE 2-RELATED (1 of 2) & probable glutathione peroxidase 2	GO:0055114, GO:0016491, GO:0016209, GO:0006979, GO:0004602 & GO:0005802 & GO:0009738 & GO:0005768 & GO:0004602 & GO:0016021 & GO:0098869 & GO:0055114 & GO:0042542 & GO:0042631	1.11.1.12 & 1.11.1.9 & 1.11.1.7	Phospholipid-hydroperoxide glutathione peroxidase. & Glutathione peroxidase & Peroxidase	PR01011 (PRINTS);PIRSF000303 (PIRSF);PF00255 (PFAM);G3DSA:3.40.30.10 (GENE3D);PTHR11592:SF33 (PANTHER);PTHR11592 (PANTHER);PS00460 (PROSITE_PATTERNS);PS00763 (PROSITE_PATTERNS);SIGNAL_PEPTIDE_N_REGION (PHOBIUS);SIGNAL_PEPTIDE (PHOBIUS);NON_CYTOPLASMIC_DOMAIN (PHOBIUS);SIGNAL_PEPTIDE_H_REGION (PHOBIUS);SIGNAL_PEPTIDE_C_REGION (PHOBIUS);PS51355 (PROSITE_PROFILES);SignalP-noTM (SIGNALP_EUK);SSF52833…	GO:0004602/GO:0006979/GO:0055114;GO:0004602/GO:0006979/GO:0055114;GO:0004602/GO:0006979/GO:0055114;GO:0004602/GO:0006979/GO:0055114;GO:0004602/GO:0006979/GO:0055114	glutathione peroxidase activity/response to oxidative stress/oxidation-reduction process;glutathione peroxidase activity/response to oxidative stress/oxidation-reduction process;glutathione peroxidase activity/response to oxidative stress/oxidation-reduction process;glutathione peroxidase activity/response to oxidative stress/oxidation-reduction process;glutathione peroxidase activity/response to…	Molecular Function/Biological Process/Biological Process;Molecular Function/Biological Process/Biological Process;Molecular Function/Biological Process/Biological Process;Molecular Function/Biological Process/Biological Process;Molecular Function/Biological Process/Biological Process	MS-DArT_site_56|MS-DArT_site_57	0
Eucgr.A00261	Chr01	814251	826787	+	K11968 - ariadne-1 (ARIH1) (1 of 4) & probable E3 ubiquitin- ligase ARI7	GO:0016567, GO:0004842 & GO:0008270 & GO:0031624 & GO:0061630 & GO:0000151 & GO:0005737 & GO:0000209 & GO:0032436 & GO:0016874 & GO:0042787	6.3.2.19	Ubiquitin--protein ligase.	Coil (COILS);SM00647 (SMART);SM00547 (SMART);PF01485 (PFAM);G3DSA:3.30.40.10 (GENE3D);PTHR11685:SF154 (PANTHER);PTHR11685 (PANTHER);PS01358 (PROSITE_PATTERNS);PS50199 (PROSITE_PROFILES);PS50089 (PROSITE_PROFILES);SSF57850 (SUPERFAMILY);SSF90209 (SUPERFAMILY);SSF57850 (SUPERFAMILY);SSF57850 (SUPERFAMILY)	GO:0008270;GO:0016567/GO:0004842;GO:0008270;GO:0008270;GO:0008270/GO:0005515;GO:0008270	zinc ion binding;protein ubiquitination/ubiquitin-protein transferase activity;zinc ion binding;zinc ion binding;zinc ion binding/protein binding;zinc ion binding	Molecular Function;Biological Process/Molecular Function;Molecular Function;Molecular Function;Molecular Function/Molecular Function;Molecular Function	MS-DArT_site_68,MS-DArT_site_63	0,0
Eucgr.A00081	Chr01	1675993	1692241	+	K16196 - eukaryotic translation initiation factor 2-alpha kinase 4 (EIF2AK4) (1 of 3) & probable serine threonine- kinase GCN2	GO:0006468, GO:0004672 & GO:0005524 & GO:0004672 & GO:0006468	2.7.11.1	Non-specific serine/threonine protein kinase.	G3DSA:3.40.50.800 (GENE3D);PF00069 (PFAM);PF12745 (PFAM);G3DSA:1.10.510.10 (GENE3D);G3DSA:3.30.930.10 (GENE3D);PF13393 (PFAM);G3DSA:3.30.200.20 (GENE3D);PTHR11042:SF96 (PANTHER);PTHR11042 (PANTHER);PTHR11042:SF96 (PANTHER);PS00109 (PROSITE_PATTERNS);PS00107 (PROSITE_PATTERNS);PS50011 (PROSITE_PROFILES);SSF56112 (SUPERFAMILY);SSF52954 (SUPERFAMILY);SSF55681 (SUPERFAMILY)	GO:0005524/GO:0004672/GO:0006468;GO:0004672/GO:0006468;GO:0005524;GO:0005524/GO:0004672/GO:0006468	ATP binding/protein kinase activity/protein phosphorylation;protein kinase activity/protein phosphorylation;ATP binding;ATP binding/protein kinase activity/protein phosphorylation	Molecular Function/Molecular Function/Biological Process;Molecular Function/Biological Process;Molecular Function;Molecular Function/Molecular Function/Biological Process	MS-DArT_site_143	0
Eucgr.A00083	Chr01	1701516	1706110	-	PREDICTED: uncharacterized protein LOC104450969, partial				PTHR36376:SF1 (PANTHER);PTHR36376 (PANTHER)				MS-DArT_site_147	0
Eucgr.A00093	Chr01	1798729	1803599	+	PF01985 - CRS1 / YhbY (CRM) domain (CRS1_YhbY) (1 of 24) & uncharacterized CRM domain-containing chloroplastic	GO:0003723			Coil (COILS);SM01103 (SMART);PF01985 (PFAM);G3DSA:3.30.110.60 (GENE3D);PTHR31426 (PANTHER);PTHR31426:SF2 (PANTHER);NON_CYTOPLASMIC_DOMAIN (PHOBIUS);SIGNAL_PEPTIDE_H_REGION (PHOBIUS);SIGNAL_PEPTIDE_N_REGION (PHOBIUS);SIGNAL_PEPTIDE_C_REGION (PHOBIUS);SIGNAL_PEPTIDE (PHOBIUS);PS51295 (PROSITE_PROFILES);SignalP-noTM (SIGNALP_GRAM_NEGATIVE);SignalP-TM (SIGNALP_GRAM_POSITIVE);SSF75471 (SUPERFAMILY)	GO:0003723;GO:0003723;GO:0003723;GO:0003723;GO:0003723	RNA binding;RNA binding;RNA binding;RNA binding;RNA binding	Molecular Function;Molecular Function;Molecular Function;Molecular Function;Molecular Function	MS-DArT_site_165	0
Eucgr.A00285	Chr01	2045683	2053620	-	K08057 - calreticulin (CALR) (1 of 3), & calreticulin-3	GO:0051082, GO:0006457, GO:0005783, GO:0005509 & GO:0005789 & GO:0046283 & GO:0005509 & GO:0016021 & GO:0010204 & GO:0051082 & GO:0006457 & GO:0009626 & GO:0042742			Coil (COILS);PR00626 (PRINTS);PF00262 (PFAM);G3DSA:2.60.120.200 (GENE3D);PIRSF002356 (PIRSF);PTHR11073:SF6 (PANTHER);PTHR11073 (PANTHER);PS00803 (PROSITE_PATTERNS);SIGNAL_PEPTIDE_C_REGION (PHOBIUS);SIGNAL_PEPTIDE_N_REGION (PHOBIUS);SIGNAL_PEPTIDE_H_REGION (PHOBIUS);NON_CYTOPLASMIC_DOMAIN (PHOBIUS);SIGNAL_PEPTIDE (PHOBIUS);SSF63887 (SUPERFAMILY);SSF49899 (SUPERFAMILY);TMhelix (TMHMM)	GO:0005509/GO:0005783/GO:0006457/GO:0051082;GO:0005509/GO:0005783/GO:0006457/GO:0051082;GO:0005783/GO:0005509/GO:0006457/GO:0051082;GO:0005509/GO:0005783/GO:0006457/GO:0051082;GO:0005509;GO:0005509/GO:0005515	calcium ion binding/endoplasmic reticulum/protein folding/unfolded protein binding;calcium ion binding/endoplasmic reticulum/protein folding/unfolded protein binding;endoplasmic reticulum/calcium ion binding/protein folding/unfolded protein binding;calcium ion binding/endoplasmic reticulum/protein folding/unfolded protein binding;calcium ion binding;calcium ion binding/protein binding	Molecular Function/Cellular Component/Biological Process/Molecular Function;Molecular Function/Cellular Component/Biological Process/Molecular Function;Cellular Component/Molecular Function/Biological Process/Molecular Function;Molecular Function/Cellular Component/Biological Process/Molecular Function;Molecular Function;Molecular Function/Molecular Function	MS-DArT_site_191	0
Eucgr.A00286	Chr01	2056255	2061313	+	K11095 - U1 small nuclear ribonucleoprotein C (SNRPC) (1 of 2) & U1 small nuclear ribonucleo C	GO:0008270, GO:0005685, GO:0000398, GO:0000387 & GO:0000243 & GO:0008270 & GO:0000395 & GO:0030627 & GO:0030619 & GO:0003729 & GO:0071004 & GO:0005685 & GO:0000387			SM00451 (SMART);PF06220 (PFAM);PTHR31148 (PANTHER);PTHR31148:SF1 (PANTHER);PS50171 (PROSITE_PROFILES);SSF57667 (SUPERFAMILY)	GO:0003676/GO:0008270;GO:0008270;GO:0005685/GO:0000387/GO:0000398;GO:0005634/GO:0008270/GO:0003676	nucleic acid binding/zinc ion binding;zinc ion binding;U1 snRNP/spliceosomal snRNP assembly/mRNA splicing, via spliceosome;nucleus/zinc ion binding/nucleic acid binding	Molecular Function/Molecular Function;Molecular Function;Cellular Component/Biological Process/Biological Process;Cellular Component/Molecular Function/Molecular Function	MS-DArT_site_192	0
Eucgr.A00287	Chr01	2077591	2080727	-	PTHR13077:SF6 - 15 KDA SELENOPROTEIN (1 of 2), & 15 kDa seleno	GO:0016021			PF08806 (PFAM);PTHR13077 (PANTHER);PTHR13077:SF6 (PANTHER);NON_CYTOPLASMIC_DOMAIN (PHOBIUS);SIGNAL_PEPTIDE_C_REGION (PHOBIUS);SIGNAL_PEPTIDE_H_REGION (PHOBIUS);SIGNAL_PEPTIDE_N_REGION (PHOBIUS);SIGNAL_PEPTIDE (PHOBIUS);SignalP-TM (SIGNALP_GRAM_POSITIVE);SignalP-noTM (SIGNALP_EUK);SSF52833 (SUPERFAMILY);TMhelix (TMHMM)				MS-DArT_site_194	0
Eucgr.A00110	Chr01	2077964	2080616	-	PTHR13077:SF6 - 15 KDA SELENOPROTEIN (1 of 2) & 15 kDa seleno	GO:0016021			PF08806 (PFAM);PTHR13077 (PANTHER);PTHR13077:SF6 (PANTHER);SIGNAL_PEPTIDE_H_REGION (PHOBIUS);SIGNAL_PEPTIDE_N_REGION (PHOBIUS);SIGNAL_PEPTIDE_C_REGION (PHOBIUS);SIGNAL_PEPTIDE (PHOBIUS);NON_CYTOPLASMIC_DOMAIN (PHOBIUS);SignalP-noTM (SIGNALP_EUK);SignalP-TM (SIGNALP_GRAM_POSITIVE);SSF52833 (SUPERFAMILY);TMhelix (TMHMM)				MS-DArT_site_194	0
Eucgr.A00035	Chr01	2476351	2484856	+	PTHR22957:SF26 - PROTEIN TBC-3, ISOFORM B (1 of 1) & GTPase-activating GYP1	GO:0031338 & GO:0090630 & GO:0005096 & GO:0012505 & GO:0006886 & GO:0017137 & GO:0005622			SM00164 (SMART);PF00566 (PFAM);G3DSA:1.10.8.270 (GENE3D);PTHR22957:SF26 (PANTHER);PTHR22957 (PANTHER);PS50086 (PROSITE_PROFILES);SSF47923 (SUPERFAMILY);SSF47923 (SUPERFAMILY)				MS-DArT_site_237	0
Eucgr.A00019	Chr01	2630746	2638304	-	K17866 - diphthamide biosynthesis protein 2 (DPH2) (1 of 1) & diphthamide biosynthesis 2	GO:0017183 & GO:0016021			TIGR00272 (TIGRFAM);PF01866 (PFAM);TIGR00322 (TIGRFAM);PTHR10762 (PANTHER);PTHR10762:SF2 (PANTHER)	GO:0017183;GO:0017183	peptidyl-diphthamide biosynthetic process from peptidyl-histidine;peptidyl-diphthamide biosynthetic process from peptidyl-histidine	Biological Process;Biological Process	MS-DArT_site_261	0
Eucgr.A00018	Chr01	2639132	2647116	+	K03969 - phage shock protein A (pspA) (1 of 3) & membrane-associated 30 kDa chloroplastic	GO:0005829 & GO:0010027 & GO:0009535			Coil (COILS);Coil (COILS);PF04012 (PFAM);PTHR31088:SF6 (PANTHER);PTHR31088 (PANTHER)				MS-DArT_site_263	0
Eucgr.A00016	Chr01	2653889	2657909	+	K01658 - anthranilate synthase component II (trpG) (1 of 1) & anthranilate synthase beta subunit chloroplastic-like	GO:0016787, GO:0006541 & GO:0000162 & GO:0005829 & GO:0005950 & GO:0004049	4.1.3.27	Anthranilate synthase. & Anthranilate synthase	PR00099 (PRINTS);PR00097 (PRINTS);PR00096 (PRINTS);TIGR00566 (TIGRFAM);G3DSA:3.40.50.880 (GENE3D);PF00117 (PFAM);PTHR11922:SF37 (PANTHER);PTHR11922 (PANTHER);PS51273 (PROSITE_PROFILES);SSF52317 (SUPERFAMILY)	GO:0008152	metabolic process	Biological Process	MS-DArT_site_268	0
Eucgr.A00001	Chr01	2787014	2792340	-	K09540 - translocation protein SEC63 (SEC63, DNAJC23) (1 of 1) & dnaJ ERDJ2A-like	GO:0031204, GO:0008565 & GO:0030176 & GO:0005886			PR00625 (PRINTS);SM00271 (SMART);SM00973 (SMART);G3DSA:1.10.3380.10 (GENE3D);G3DSA:2.60.40.150 (GENE3D);G3DSA:1.10.287.110 (GENE3D);G3DSA:1.10.150.20 (GENE3D);PF02889 (PFAM);PF00226 (PFAM);PTHR24075:SF0 (PANTHER);PTHR24075 (PANTHER);TRANSMEMBRANE (PHOBIUS);CYTOPLASMIC_DOMAIN (PHOBIUS);TRANSMEMBRANE (PHOBIUS);TRANSMEMBRANE (PHOBIUS);CYTOPLASMIC_DOMAIN (PHOBIUS);NON_CYTOPLASMIC_DOMAIN (PHOBIUS);NON…	GO:0005515	protein binding	Molecular Function	MS-DArT_site_279	0
Eucgr.L00003	Chr01	2912165	2928280	-	KOG1032 - Uncharacterized conserved protein, contains GRAM domain (1 of 6) & BAG-associated GRAM 1 isoform X1	GO:0005515 & GO:0016021			Coil (COILS);PR00360 (PRINTS);SM00568 (SMART);SM00239 (SMART);PF02893 (PFAM);PF16016 (PFAM);PF00168 (PFAM);G3DSA:2.60.40.150 (GENE3D);PTHR23319 (PANTHER);PTHR23319:SF17 (PANTHER);PTHR23319 (PANTHER);PTHR23319:SF17 (PANTHER);TRANSMEMBRANE (PHOBIUS);CYTOPLASMIC_DOMAIN (PHOBIUS);TRANSMEMBRANE (PHOBIUS);NON_CYTOPLASMIC_DOMAIN (PHOBIUS);NON_CYTOPLASMIC_DOMAIN (PHOBIUS);PS50004 (PROSITE_PROFILES);SSF49…	GO:0005515;GO:0005515;GO:0005515;GO:0005515;GO:0005515;GO:0005515	protein binding;protein binding;protein binding;protein binding;protein binding;protein binding	Molecular Function;Molecular Function;Molecular Function;Molecular Function;Molecular Function;Molecular Function	MS-DArT_site_299	0
Eucgr.L00009	Chr01	2968286	2974430	-	PTHR10314:SF110 - CYSTEINE SYNTHASE (1 of 1), & cysteine synthase-like	GO:0030170 & GO:0005737 & GO:0008652 & GO:0004124 & GO:0016740 & GO:0006535	2.5.1.47	Cysteine synthase. & Cysteine synthase	G3DSA:3.40.50.1100 (GENE3D);TIGR01139 (TIGRFAM);TIGR01136 (TIGRFAM);G3DSA:3.40.50.1100 (GENE3D);PF00291 (PFAM);PTHR10314:SF110 (PANTHER);PTHR10314 (PANTHER);PS00901 (PROSITE_PATTERNS);SignalP-TM (SIGNALP_GRAM_POSITIVE);SSF53686 (SUPERFAMILY)	GO:0004124/GO:0006535;GO:0004124/GO:0006535;GO:0006535	cysteine synthase activity/cysteine biosynthetic process from serine;cysteine synthase activity/cysteine biosynthetic process from serine;cysteine biosynthetic process from serine	Molecular Function/Biological Process;Molecular Function/Biological Process;Biological Process	MS-DArT_site_311	0
Eucgr.L00012	Chr01	2992348	3009231	+	PTHR11200:SF119 - PHOSPHOINOSITIDE PHOSPHATASE SAC9-RELATED (1 of 1) & probable phosphoinositide phosphatase SAC9	GO:0005515, GO:0042578 & GO:0005524 & GO:0016021 & GO:0004672 & GO:0006468 & GO:0042578	3.1	Acting on ester bonds	Coil (COILS);SM00456 (SMART);PF00397 (PFAM);PF02383 (PFAM);G3DSA:2.20.70.10 (GENE3D);PTHR11200:SF119 (PANTHER);PTHR11200 (PANTHER);PS01159 (PROSITE_PATTERNS);PS50020 (PROSITE_PROFILES);PS50275 (PROSITE_PROFILES);SSF51045 (SUPERFAMILY)	GO:0005515;GO:0005515;GO:0042578;GO:0005515;GO:0005515;GO:0042578;GO:0005515	protein binding;protein binding;phosphoric ester hydrolase activity;protein binding;protein binding;phosphoric ester hydrolase activity;protein binding	Molecular Function;Molecular Function;Molecular Function;Molecular Function;Molecular Function;Molecular Function;Molecular Function	MS-DArT_site_317,MS-DArT_site_314	0,0
Eucgr.A00394	Chr01	6441001	6446622	+	1.5.1.20 - Methylenetetrahydrofolate reductase (NAD(P)H) / N(5,10)-methylenetetrahydrofolate reductase (1 of 2), & methylenetetrahydrofolate reductase 2-like	GO:0055114, GO:0006555, GO:0004489 & GO:0009086 & GO:0005829 & GO:0035999 & GO:0055114 & GO:0004489	1.5.1.20	Methylenetetrahydrofolate reductase (NAD(P)H). & Methylenetetrahydrofolate reductase (NAD(P)H)	TIGR00677 (TIGRFAM);PF02219 (PFAM);G3DSA:3.20.20.220 (GENE3D);PTHR21091 (PANTHER);PTHR21091:SF31 (PANTHER);SSF51730 (SUPERFAMILY)	GO:0055114/GO:0006555/GO:0004489;GO:0055114/GO:0006555/GO:0004489	oxidation-reduction process/methionine metabolic process/methylenetetrahydrofolate reductase (NAD(P)H) activity;oxidation-reduction process/methionine metabolic process/methylenetetrahydrofolate reductase (NAD(P)H) activity	Biological Process/Biological Process/Molecular Function;Biological Process/Biological Process/Molecular Function	MS-DArT_site_575	0
Eucgr.A00141	Chr01	7418486	7419555	-	PF00407 - Pathogenesis-related protein Bet v I family (Bet_v_1) (1 of 112) & major allergen Pru ar 1-like	GO:0009607, GO:0006952 & GO:0005634 & GO:0004864 & GO:0009607 & GO:0009738 & GO:0043086 & GO:0080163 & GO:0005737 & GO:0010427 & GO:0004872 & GO:0006952			PR00634 (PRINTS);SM01037 (SMART);PF00407 (PFAM);G3DSA:3.30.530.20 (GENE3D);PTHR31213 (PANTHER);PTHR31213:SF20 (PANTHER);SSF55961 (SUPERFAMILY)	GO:0009607/GO:0006952;GO:0009607/GO:0006952	response to biotic stimulus/defense response;response to biotic stimulus/defense response	Biological Process/Biological Process;Biological Process/Biological Process	MS-DArT_site_725|MS-DArT_site_726	0
Eucgr.A00190	Chr01	7811244	7814387	-	PTHR31052:SF3 - COBRA-LIKE PROTEIN 7-RELATED (1 of 2) & COBRA 7	GO:0031225, GO:0016049, GO:0010215 & GO:0016021 & GO:0010215 & GO:0016049 & GO:0031225			PF04833 (PFAM);G3DSA:2.60.40.290 (GENE3D);PTHR31052:SF3 (PANTHER);PTHR31052 (PANTHER);CYTOPLASMIC_DOMAIN (PHOBIUS);SIGNAL_PEPTIDE_H_REGION (PHOBIUS);SIGNAL_PEPTIDE_C_REGION (PHOBIUS);NON_CYTOPLASMIC_DOMAIN (PHOBIUS);SIGNAL_PEPTIDE (PHOBIUS);TRANSMEMBRANE (PHOBIUS);SIGNAL_PEPTIDE_N_REGION (PHOBIUS);PD140986 (PRODOM);SignalP-TM (SIGNALP_GRAM_POSITIVE);SignalP-noTM (SIGNALP_GRAM_NEGATIVE);SignalP-no…	GO:0010215/GO:0031225/GO:0016049;GO:0030247/GO:0004553;GO:0010215/GO:0031225/GO:0016049	cellulose microfibril organization/anchored component of membrane/cell growth;polysaccharide binding/hydrolase activity, hydrolyzing O-glycosyl compounds;cellulose microfibril organization/anchored component of membrane/cell growth	Biological Process/Cellular Component/Biological Process;Molecular Function/Molecular Function;Biological Process/Cellular Component/Biological Process	MS-DArT_site_814,MS-DArT_site_812|MS-DArT_site_813	0,0
Eucgr.A00192	Chr01	7829844	7835744	+	K17807 - mitochondrial translocator assembly and maintenance protein 41 (TAM41, MMP37) (1 of 1) & phosphatidate mitochondrial isoform X1	GO:0009507	2.7.7.41	Phosphatidate cytidylyltransferase.	PIRSF028840 (PIRSF);PF09139 (PFAM);PTHR13619 (PANTHER);PTHR13619:SF0 (PANTHER)				MS-DArT_site_819	0
Eucgr.A01322	Chr01	8216851	8222493	-	K15027 - translation initiation factor 2D (EIF2D) (1 of 1) & eukaryotic translation initiation factor 2D	GO:0006413, GO:0003743 & GO:0003743 & GO:0006413			PF01253 (PFAM);G3DSA:2.30.130.10 (GENE3D);G3DSA:3.30.780.10 (GENE3D);G3DSA:1.10.245.10 (GENE3D);TIGR00451 (TIGRFAM);PTHR12217 (PANTHER);PTHR12217:SF4 (PANTHER);PS50890 (PROSITE_PROFILES);PS50296 (PROSITE_PROFILES);SSF55159 (SUPERFAMILY);SSF88697 (SUPERFAMILY);SSF47592 (SUPERFAMILY)	GO:0003743/GO:0006413;GO:0003743/GO:0006413;GO:0005515;GO:0003723;GO:0003723;GO:0003743/GO:0006413;GO:0003743/GO:0006413;GO:0005515	translation initiation factor activity/translational initiation;translation initiation factor activity/translational initiation;protein binding;RNA binding;RNA binding;translation initiation factor activity/translational initiation;translation initiation factor activity/translational initiation;protein binding	Molecular Function/Biological Process;Molecular Function/Biological Process;Molecular Function;Molecular Function;Molecular Function;Molecular Function/Biological Process;Molecular Function/Biological Process;Molecular Function	MS-DArT_site_878	0
Eucgr.A01341	Chr01	8536124	8539332	-	PF00069//PF00560//PF08263//PF13855 - Protein kinase domain (Pkinase) // Leucine Rich Repeat (LRR_1) // Leucine rich repeat N-terminal domain (LRRNT_2) // Leucine rich repeat (LRR_8) (1 of 110) & MDIS1-interacting receptor like kinase 2	GO:0005515, GO:0006468, GO:0005524, GO:0004672 & GO:0005524 & GO:0016021 & GO:0004672 & GO:0006468	2.7.11.1	Non-specific serine/threonine protein kinase.	Coil (COILS);SM00369 (SMART);G3DSA:2.60.120.200 (GENE3D);PF08263 (PFAM);G3DSA:3.80.10.10 (GENE3D);G3DSA:1.10.510.10 (GENE3D);G3DSA:3.30.200.20 (GENE3D);PF00069 (PFAM);G3DSA:3.80.10.10 (GENE3D);PTHR27000:SF64 (PANTHER);PTHR27000 (PANTHER);PS00107 (PROSITE_PATTERNS);PS00109 (PROSITE_PATTERNS);SIGNAL_PEPTIDE (PHOBIUS);TRANSMEMBRANE (PHOBIUS);SIGNAL_PEPTIDE_H_REGION (PHOBIUS);SIGNAL_PEPTIDE_C_REGION …	GO:0005524/GO:0006468/GO:0004672;GO:0005524;GO:0006468/GO:0004672;GO:0005515;GO:0005524/GO:0006468/GO:0004672	ATP binding/protein phosphorylation/protein kinase activity;ATP binding;protein phosphorylation/protein kinase activity;protein binding;ATP binding/protein phosphorylation/protein kinase activity	Molecular Function/Biological Process/Molecular Function;Molecular Function;Biological Process/Molecular Function;Molecular Function;Molecular Function/Biological Process/Molecular Function	MS-DArT_site_921	0
Eucgr.A01347	Chr01	8721161	8724369	-	PF00069//PF00560//PF08263//PF13855 - Protein kinase domain (Pkinase) // Leucine Rich Repeat (LRR_1) // Leucine rich repeat N-terminal domain (LRRNT_2) // Leucine rich repeat (LRR_8) (1 of 110) & MDIS1-interacting receptor like kinase 2	GO:0005515, GO:0006468, GO:0005524, GO:0004672 & GO:0005524 & GO:0016021 & GO:0004672 & GO:0006468	2.7.11.1	Non-specific serine/threonine protein kinase.	Coil (COILS);SM00369 (SMART);G3DSA:3.80.10.10 (GENE3D);G3DSA:3.80.10.10 (GENE3D);PF00560 (PFAM);PF08263 (PFAM);G3DSA:1.10.510.10 (GENE3D);G3DSA:3.30.200.20 (GENE3D);G3DSA:2.60.120.200 (GENE3D);PF00069 (PFAM);PTHR27000:SF64 (PANTHER);PTHR27000 (PANTHER);PS00107 (PROSITE_PATTERNS);PS00109 (PROSITE_PATTERNS);NON_CYTOPLASMIC_DOMAIN (PHOBIUS);CYTOPLASMIC_DOMAIN (PHOBIUS);SIGNAL_PEPTIDE_N_REGION (PHOBI…	GO:0005515;GO:0004672/GO:0005524/GO:0006468;GO:0005524;GO:0004672/GO:0006468;GO:0004672/GO:0005524/GO:0006468;GO:0005515	protein binding;protein kinase activity/ATP binding/protein phosphorylation;ATP binding;protein kinase activity/protein phosphorylation;protein kinase activity/ATP binding/protein phosphorylation;protein binding	Molecular Function;Molecular Function/Molecular Function/Biological Process;Molecular Function;Molecular Function/Biological Process;Molecular Function/Molecular Function/Biological Process;Molecular Function	MS-DArT_site_939	0
Eucgr.A01354	Chr01	8841339	8844469	-	PF00069//PF00560//PF08263//PF13855 - Protein kinase domain (Pkinase) // Leucine Rich Repeat (LRR_1) // Leucine rich repeat N-terminal domain (LRRNT_2) // Leucine rich repeat (LRR_8) (1 of 110) & MDIS1-interacting receptor like kinase 2	GO:0005515, GO:0006468, GO:0005524, GO:0004672 & GO:0005524 & GO:0016021 & GO:0004672 & GO:0006468	2.7.11.1	Non-specific serine/threonine protein kinase.	Coil (COILS);SM00369 (SMART);G3DSA:3.80.10.10 (GENE3D);G3DSA:1.10.510.10 (GENE3D);G3DSA:2.60.120.200 (GENE3D);PF13855 (PFAM);PF00069 (PFAM);G3DSA:3.30.200.20 (GENE3D);PF00560 (PFAM);PTHR27000 (PANTHER);PTHR27000:SF64 (PANTHER);PS00109 (PROSITE_PATTERNS);PS00107 (PROSITE_PATTERNS);NON_CYTOPLASMIC_DOMAIN (PHOBIUS);TRANSMEMBRANE (PHOBIUS);CYTOPLASMIC_DOMAIN (PHOBIUS);PS51450 (PROSITE_PROFILES);PS514…	GO:0005515;GO:0006468/GO:0004672/GO:0005524;GO:0005515;GO:0004672/GO:0006468;GO:0005524;GO:0005515;GO:0005515;GO:0005515;GO:0006468/GO:0004672/GO:0005524;GO:0005515;GO:0005515;GO:0005515;GO:0005515;GO:0005515;GO:0005515;GO:0005515;GO:0005515;GO:0005515;GO:0005515	protein binding;protein phosphorylation/protein kinase activity/ATP binding;protein binding;protein kinase activity/protein phosphorylation;ATP binding;protein binding;protein binding;protein binding;protein phosphorylation/protein kinase activity/ATP binding;protein binding;protein binding;protein binding;protein binding;protein binding;protein binding;protein binding;protein binding;protein bin…	Molecular Function;Biological Process/Molecular Function/Molecular Function;Molecular Function;Molecular Function/Biological Process;Molecular Function;Molecular Function;Molecular Function;Molecular Function;Biological Process/Molecular Function/Molecular Function;Molecular Function;Molecular Function;Molecular Function;Molecular Function;Molecular Function;Molecular Function;Molecular Function;…	MS-DArT_site_955	0
Eucgr.A01374	Chr01	9058843	9062785	+	2.7.4.9 - dTMP kinase / TMPK (1 of 1) & thymidylate kinase-like isoform X1	GO:0004798 & GO:0005524 & GO:0046939 & GO:0005739 & GO:0006233 & GO:0005829 & GO:0005654 & GO:0016787	2.7.4.9	dTMP kinase. & dTMP kinase	TIGR00041 (TIGRFAM);G3DSA:3.40.50.300 (GENE3D);PF02223 (PFAM);PTHR10344 (PANTHER);PS01331 (PROSITE_PATTERNS);SSF52540 (SUPERFAMILY)	GO:0004798/GO:0006233/GO:0005524;GO:0004798/GO:0006233/GO:0005524	thymidylate kinase activity/dTDP biosynthetic process/ATP binding;thymidylate kinase activity/dTDP biosynthetic process/ATP binding	Molecular Function/Biological Process/Molecular Function;Molecular Function/Biological Process/Molecular Function	MS-DArT_site_980,MS-DArT_site_979	0,0
Eucgr.A00956	Chr01	10469730	10473724	+	6.1.1.1 - Tyrosine--tRNA ligase / Tyrosyl-tRNA synthetase (1 of 3) & tyrosine--tRNA ligase cytoplasmic	GO:0006418, GO:0005524, GO:0004812, GO:0000166 & GO:0004832 & GO:0004831 & GO:0005524 & GO:0006438 & GO:0005829	6.1.1.1 & 6.1.1 & 6.1.1.9	Tyrosine--tRNA ligase. & Tyrosine--tRNA ligase & Forming carbon-oxygen bonds & Valine--tRNA ligase	G3DSA:3.40.50.620 (GENE3D);G3DSA:1.10.240.10 (GENE3D);PIRSF006588 (PIRSF);PF00579 (PFAM);PTHR11946 (PANTHER);PTHR11946:SF53 (PANTHER);SSF52374 (SUPERFAMILY)	GO:0004831;GO:0005524/GO:0006418/GO:0000166/GO:0004812	tyrosine-tRNA ligase activity;ATP binding/tRNA aminoacylation for protein translation/nucleotide binding/aminoacyl-tRNA ligase activity	Molecular Function;Molecular Function/Biological Process/Molecular Function/Molecular Function	MS-DArT_site_1096|MS-DArT_site_1097	0
Eucgr.A00953	Chr01	10486341	10488627	+	PF04859 - Plant protein of unknown function (DUF641) (DUF641) (1 of 6) & IRK-interacting				Coil (COILS);PF04859 (PFAM);PTHR31161 (PANTHER)				MS-DArT_site_1099|MS-DArT_site_1100	0
Eucgr.A00913	Chr01	11066211	11071128	-	PTHR13718//PTHR13718:SF63 - RIBOSOMAL S SUBUNIT // SUBFAMILY NOT NAMED (1 of 1) & probable 37S ribosomal mitochondrial	GO:0006412, GO:0005840, GO:0003735, GO:0003723 & GO:0005802 & GO:0005768 & GO:0003723 & GO:0003735 & GO:0022627 & GO:0005763 & GO:0006412			Coil (COILS);Coil (COILS);Coil (COILS);PF00333 (PFAM);PF03719 (PFAM);G3DSA:3.30.160.20 (GENE3D);G3DSA:3.30.230.10 (GENE3D);PTHR13718 (PANTHER);PTHR13718:SF63 (PANTHER);SIGNAL_PEPTIDE (PHOBIUS);SIGNAL_PEPTIDE_N_REGION (PHOBIUS);SIGNAL_PEPTIDE_C_REGION (PHOBIUS);SIGNAL_PEPTIDE_H_REGION (PHOBIUS);NON_CYTOPLASMIC_DOMAIN (PHOBIUS);PS50881 (PROSITE_PROFILES);SSF54211 (SUPERFAMILY);SSF54768 (SUPERFAMILY)	GO:0005840/GO:0006412/GO:0003723/GO:0003735;GO:0003735/GO:0006412/GO:0005840;GO:0003735/GO:0005840/GO:0006412;GO:0005840/GO:0006412/GO:0003723/GO:0003735	ribosome/translation/RNA binding/structural constituent of ribosome;structural constituent of ribosome/translation/ribosome;structural constituent of ribosome/ribosome/translation;ribosome/translation/RNA binding/structural constituent of ribosome	Cellular Component/Biological Process/Molecular Function/Molecular Function;Molecular Function/Biological Process/Cellular Component;Molecular Function/Cellular Component/Biological Process;Cellular Component/Biological Process/Molecular Function/Molecular Function	MS-DArT_site_1168	0
Eucgr.A00911	Chr01	11085083	11093314	+	PTHR24291:SF46 - CYTOCHROME P450 97B3, CHLOROPLASTIC (1 of 1) & cytochrome P450 chloroplastic	GO:0055114, GO:0020037, GO:0016705, GO:0005506 & GO:0036101 & GO:0005506 & GO:0052871 & GO:0031969 & GO:0070330 & GO:0050051 & GO:0055114 & GO:0020037	1.14.14.1 & 1.14.14 & 1.14.13.30 & 1.14.13	Unspecific monooxygenase & Acting on paired donors, with incorporation or reduction of molecular oxygen. The oxygen incorporated need not be derived from O(2) & Leukotriene-B(4) 20-monooxygenase	PR00463 (PRINTS);PR00385 (PRINTS);G3DSA:1.10.630.10 (GENE3D);PF00067 (PFAM);PTHR24291 (PANTHER);PTHR24291:SF46 (PANTHER);PTHR24291 (PANTHER);PTHR24291:SF46 (PANTHER);PS00086 (PROSITE_PATTERNS);CYTOPLASMIC_DOMAIN (PHOBIUS);NON_CYTOPLASMIC_DOMAIN (PHOBIUS);TRANSMEMBRANE (PHOBIUS);SSF48264 (SUPERFAMILY)	GO:0020037/GO:0016705/GO:0055114/GO:0005506;GO:0055114/GO:0016705/GO:0005506/GO:0020037;GO:0055114/GO:0016705/GO:0005506/GO:0020037;GO:0055114/GO:0016705/GO:0005506/GO:0020037;GO:0055114/GO:0016705;GO:0055114/GO:0016705/GO:0005506/GO:0020037	heme binding/oxidoreductase activity, acting on paired donors, with incorporation or reduction of molecular oxygen/oxidation-reduction process/iron ion binding;oxidation-reduction process/oxidoreductase activity, acting on paired donors, with incorporation or reduction of molecular oxygen/iron ion binding/heme binding;oxidation-reduction process/oxidoreductase activity, acting on paired donors, w…	Molecular Function/Molecular Function/Biological Process/Molecular Function;Biological Process/Molecular Function/Molecular Function/Molecular Function;Biological Process/Molecular Function/Molecular Function/Molecular Function;Biological Process/Molecular Function/Molecular Function/Molecular Function;Biological Process/Molecular Function;Biological Process/Molecular Function/Molecular Function/…	MS-DArT_site_1171	0
Eucgr.A00908	Chr01	11105174	11110502	-	PTHR31669:SF26 - PROTEIN FAR-RED ELONGATED HYPOCOTYL 3 (1 of 1) & FAR-RED ELONGATED HYPOCOTYL 3-like	GO:0008270, GO:0006355 & GO:0005634 & GO:0003700 & GO:0008270 & GO:0009585 & GO:0010218 & GO:0045893 & GO:0007623 & GO:0042753			SM00575 (SMART);PF10551 (PFAM);PF03101 (PFAM);PF04434 (PFAM);PTHR31669:SF26 (PANTHER);PTHR31669 (PANTHER);NON_CYTOPLASMIC_DOMAIN (PHOBIUS);CYTOPLASMIC_DOMAIN (PHOBIUS);TRANSMEMBRANE (PHOBIUS);PS50966 (PROSITE_PROFILES)	GO:0008270;GO:0008270;GO:0006355;GO:0008270	zinc ion binding;zinc ion binding;regulation of transcription, DNA-templated;zinc ion binding	Molecular Function;Molecular Function;Biological Process;Molecular Function	MS-DArT_site_1177	0
Eucgr.A00907	Chr01	11115294	11119177	+	PTHR31476:SF2 - UBIQUITIN CARBOXYL-TERMINAL HYDROLASE FAMILY PROTEIN (1 of 1) & ROOT PRIMORDIUM DEFECTIVE 1				PF11955 (PFAM);PTHR31476 (PANTHER);PTHR31476:SF2 (PANTHER)				MS-DArT_site_1179	0
Eucgr.A00906	Chr01	11121339	11129281	+	PTHR22883:SF15 - PROTEIN S-ACYLTRANSFERASE 19-RELATED (1 of 1) & probable S-acyltransferase 19	GO:0008270 & GO:0019706 & GO:0016021	2.3.1.225 & 2.3.1	Protein S-acyltransferase. & Protein S-acyltransferase & Acyltransferases	PF01529 (PFAM);PTHR22883:SF15 (PANTHER);PTHR22883 (PANTHER);CYTOPLASMIC_DOMAIN (PHOBIUS);CYTOPLASMIC_DOMAIN (PHOBIUS);TRANSMEMBRANE (PHOBIUS);NON_CYTOPLASMIC_DOMAIN (PHOBIUS);TRANSMEMBRANE (PHOBIUS);CYTOPLASMIC_DOMAIN (PHOBIUS);NON_CYTOPLASMIC_DOMAIN (PHOBIUS);TRANSMEMBRANE (PHOBIUS);TRANSMEMBRANE (PHOBIUS);PS50216 (PROSITE_PROFILES);TMhelix (TMHMM);TMhelix (TMHMM);TMhelix (TMHMM);TMhelix (TMHMM)	GO:0008270;GO:0008270	zinc ion binding;zinc ion binding	Molecular Function;Molecular Function	MS-DArT_site_1181,MS-DArT_site_1182	0,0
Eucgr.A00868	Chr01	11779156	11783908	+	5.4.2.11//5.4.2.12 - Phosphoglycerate mutase (2,3-diphosphoglycerate-dependent) / Phosphoglyceromutase // Phosphoglycerate mutase (2,3-diphosphoglycerate-independent) / Phosphoglyceromutase (1 of 2) & 2,3-bisphosphoglycerate-independent phosphoglycerate mutase	GO:0030145, GO:0006007, GO:0005737, GO:0004619, GO:0046872, GO:0003824 & GO:0005737 & GO:0006096 & GO:0004619 & GO:0030145 & GO:0006007	5.4.2.12, 5.4.2.11 & 5.4.2.1	Phosphoglycerate mutase (2,3-diphosphoglycerate-independent)., Phosphoglycerate mutase (2,3-diphosphoglycerate-dependent). & Intramolecular transferases	Coil (COILS);PIRSF001492 (PIRSF);G3DSA:3.40.720.10 (GENE3D);G3DSA:3.40.1450.10 (GENE3D);PF01676 (PFAM);TIGR01307 (TIGRFAM);PF06415 (PFAM);PTHR31637:SF3 (PANTHER);PTHR31637 (PANTHER);SSF53649 (SUPERFAMILY);SSF64158 (SUPERFAMILY)	GO:0006007/GO:0004619;GO:0003824/GO:0008152;GO:0030145/GO:0005737/GO:0004619/GO:0006007;GO:0046872/GO:0003824;GO:0006007/GO:0004619;GO:0030145/GO:0005737/GO:0004619/GO:0006007;GO:0008152/GO:0003824;GO:0030145/GO:0005737/GO:0004619/GO:0006007	glucose catabolic process/phosphoglycerate mutase activity;catalytic activity/metabolic process;manganese ion binding/cytoplasm/phosphoglycerate mutase activity/glucose catabolic process;metal ion binding/catalytic activity;glucose catabolic process/phosphoglycerate mutase activity;manganese ion binding/cytoplasm/phosphoglycerate mutase activity/glucose catabolic process;metabolic process/catalyt…	Biological Process/Molecular Function;Molecular Function/Biological Process;Molecular Function/Cellular Component/Molecular Function/Biological Process;Molecular Function/Molecular Function;Biological Process/Molecular Function;Molecular Function/Cellular Component/Molecular Function/Biological Process;Biological Process/Molecular Function;Molecular Function/Cellular Component/Molecular Function/…	MS-DArT_site_1283,MS-DArT_site_1282,MS-DArT_site_1281	0,0,0
Eucgr.A00855	Chr01	11873041	11881839	-	mediator of RNA polymerase II transcription subunit 33A-like	GO:0016020			PTHR33739 (PANTHER);PTHR33739:SF6 (PANTHER);TRANSMEMBRANE (PHOBIUS);TRANSMEMBRANE (PHOBIUS);NON_CYTOPLASMIC_DOMAIN (PHOBIUS);CYTOPLASMIC_DOMAIN (PHOBIUS);TRANSMEMBRANE (PHOBIUS);NON_CYTOPLASMIC_DOMAIN (PHOBIUS);CYTOPLASMIC_DOMAIN (PHOBIUS)				MS-DArT_site_1299	0
Eucgr.A00820	Chr01	12084955	12091295	+	actin cytoskeleton-regulatory complex pan1				Coil (COILS);Coil (COILS);PTHR31016 (PANTHER);PTHR31016:SF6 (PANTHER)				MS-DArT_site_1358,MS-DArT_site_1357	0,0
Eucgr.A00808	Chr01	12195294	12196799	+	PF06697 - Protein of unknown function (DUF1191) (DUF1191) (1 of 5) & PREDICTED: uncharacterized protein LOC104432978	GO:0016021			PF06697 (PFAM);PTHR33512:SF1 (PANTHER);PTHR33512 (PANTHER);CYTOPLASMIC_DOMAIN (PHOBIUS);SIGNAL_PEPTIDE_N_REGION (PHOBIUS);NON_CYTOPLASMIC_DOMAIN (PHOBIUS);TRANSMEMBRANE (PHOBIUS);SIGNAL_PEPTIDE (PHOBIUS);SIGNAL_PEPTIDE_C_REGION (PHOBIUS);SIGNAL_PEPTIDE_H_REGION (PHOBIUS);SignalP-noTM (SIGNALP_EUK);TMhelix (TMHMM)				MS-DArT_site_1372	0
Eucgr.A00803	Chr01	12272872	12283445	-	PTHR27003:SF36 - LEUCINE-RICH REPEAT PROTEIN KINASE-LIKE PROTEIN (1 of 4) & probable LRR receptor-like serine threonine- kinase At1g06840 isoform X1	GO:0005515, GO:0006468, GO:0004672 & GO:0005524 & GO:0000165 & GO:0000186 & GO:0032440 & GO:0016021 & GO:0055114 & GO:0004709 & GO:0005622	2.7.11.1 & 2.7.11.25 & 2.7.11 & 1.3.1.74	Non-specific serine/threonine protein kinase. & Mitogen-activated protein kinase kinase kinase & Transferring phosphorus-containing groups & 2-alkenal reductase (NAD(P)(+))	SM00220 (SMART);SM00369 (SMART);G3DSA:1.10.510.10 (GENE3D);G3DSA:3.30.200.20 (GENE3D);PF08263 (PFAM);G3DSA:3.80.10.10 (GENE3D);PF07714 (PFAM);G3DSA:2.60.120.200 (GENE3D);PF13855 (PFAM);PTHR27003 (PANTHER);PTHR27003:SF36 (PANTHER);PTHR27003 (PANTHER);PS00107 (PROSITE_PATTERNS);PS00108 (PROSITE_PATTERNS);CYTOPLASMIC_DOMAIN (PHOBIUS);SIGNAL_PEPTIDE_C_REGION (PHOBIUS);SIGNAL_PEPTIDE (PHOBIUS);NON_CYT…	GO:0004672/GO:0005524/GO:0006468;GO:0006468/GO:0004672;GO:0005515;GO:0005524;GO:0006468/GO:0004672;GO:0005515;GO:0005515;GO:0005515;GO:0005515;GO:0005515;GO:0005515;GO:0005515;GO:0004672/GO:0005524/GO:0006468;GO:0005515	protein kinase activity/ATP binding/protein phosphorylation;protein phosphorylation/protein kinase activity;protein binding;ATP binding;protein phosphorylation/protein kinase activity;protein binding;protein binding;protein binding;protein binding;protein binding;protein binding;protein binding;protein kinase activity/ATP binding/protein phosphorylation;protein binding	Molecular Function/Molecular Function/Biological Process;Biological Process/Molecular Function;Molecular Function;Molecular Function;Biological Process/Molecular Function;Molecular Function;Molecular Function;Molecular Function;Molecular Function;Molecular Function;Molecular Function;Molecular Function;Molecular Function/Molecular Function/Biological Process;Molecular Function	MS-DArT_site_1379	0
Eucgr.A00779	Chr01	12712830	12717697	-	PTHR24351//PTHR24351:SF80 - RIBOSOMAL PROTEIN S6 KINASE // SUBFAMILY NOT NAMED (1 of 1), & serine threonine- kinase 2 19-like	GO:0005634 & GO:0005524 & GO:0005737 & GO:0004674 & GO:0006468 & GO:0035556	2.7.11.1 & 2.7.11	Non-specific serine/threonine protein kinase. & Transferring phosphorus-containing groups	SM00220 (SMART);SM00133 (SMART);G3DSA:3.30.200.20 (GENE3D);G3DSA:1.10.510.10 (GENE3D);PF00069 (PFAM);PTHR24351 (PANTHER);PTHR24351:SF80 (PANTHER);PS00107 (PROSITE_PATTERNS);PS00108 (PROSITE_PATTERNS);SIGNAL_PEPTIDE_H_REGION (PHOBIUS);NON_CYTOPLASMIC_DOMAIN (PHOBIUS);SIGNAL_PEPTIDE_N_REGION (PHOBIUS);SIGNAL_PEPTIDE (PHOBIUS);SIGNAL_PEPTIDE_C_REGION (PHOBIUS);PS50011 (PROSITE_PROFILES);PS51285 (PRO…	GO:0005524/GO:0004672/GO:0006468;GO:0004674/GO:0005524/GO:0006468;GO:0005524/GO:0004672/GO:0006468;GO:0005524;GO:0006468/GO:0004672;GO:0005524/GO:0004672/GO:0006468;GO:0004674/GO:0005524/GO:0006468	ATP binding/protein kinase activity/protein phosphorylation;protein serine/threonine kinase activity/ATP binding/protein phosphorylation;ATP binding/protein kinase activity/protein phosphorylation;ATP binding;protein phosphorylation/protein kinase activity;ATP binding/protein kinase activity/protein phosphorylation;protein serine/threonine kinase activity/ATP binding/protein phosphorylation	Molecular Function/Molecular Function/Biological Process;Molecular Function/Molecular Function/Biological Process;Molecular Function/Molecular Function/Biological Process;Molecular Function;Biological Process/Molecular Function;Molecular Function/Molecular Function/Biological Process;Molecular Function/Molecular Function/Biological Process	MS-DArT_site_1441	0
Eucgr.A00778	Chr01	12721783	12723130	+	PF01535//PF12854//PF13041 - PPR repeat (PPR) // PPR repeat (PPR_1) // PPR repeat family (PPR_2) (1 of 33) & pentatricopeptide repeat-containing mitochondrial-like				G3DSA:1.25.40.10 (GENE3D);PF12854 (PFAM);PF01535 (PFAM);TIGR00756 (TIGRFAM);PF13041 (PFAM);PTHR24015 (PANTHER);PTHR24015:SF579 (PANTHER);PS51375 (PROSITE_PROFILES);PS51375 (PROSITE_PROFILES);PS51375 (PROSITE_PROFILES);PS51375 (PROSITE_PROFILES);PS51375 (PROSITE_PROFILES);PS51375 (PROSITE_PROFILES);PS51375 (PROSITE_PROFILES);PS51375 (PROSITE_PROFILES);PS51375 (PROSITE_PROFILES)	GO:0005515	protein binding	Molecular Function	MS-DArT_site_1443	0
Eucgr.A00750	Chr01	13498200	13502675	+	KOG2568 - Predicted membrane protein (1 of 2) & transmembrane 87B	GO:0016021			PF06814 (PFAM);PTHR21229 (PANTHER);PTHR21229:SF1 (PANTHER);TRANSMEMBRANE (PHOBIUS);CYTOPLASMIC_DOMAIN (PHOBIUS);TRANSMEMBRANE (PHOBIUS);TRANSMEMBRANE (PHOBIUS);NON_CYTOPLASMIC_DOMAIN (PHOBIUS);NON_CYTOPLASMIC_DOMAIN (PHOBIUS);CYTOPLASMIC_DOMAIN (PHOBIUS);TRANSMEMBRANE (PHOBIUS);SIGNAL_PEPTIDE_C_REGION (PHOBIUS);TRANSMEMBRANE (PHOBIUS);SIGNAL_PEPTIDE_N_REGION (PHOBIUS);NON_CYTOPLASMIC_DOMAIN (PHOB…	GO:0016021;GO:0016021	integral component of membrane;integral component of membrane	Cellular Component;Cellular Component	MS-DArT_site_1512	0
Eucgr.A00733	Chr01	13709607	13715361	+	K00602 - phosphoribosylaminoimidazolecarboxamide formyltransferase / IMP cyclohydrolase (purH) (1 of 2) & bifunctional purine biosynthesis	GO:0006164, GO:0004643, GO:0003937 & GO:0006164 & GO:0003937 & GO:0004643	2.1.2.3, 3.5.4.10 & 3.5.4.10 & 2.1.2.3	Phosphoribosylaminoimidazolecarboxamide formyltransferase., IMP cyclohydrolase. & IMP cyclohydrolase & Phosphoribosylaminoimidazolecarboxamide formyltransferase	SM00798 (SMART);SM00851 (SMART);PIRSF000414 (PIRSF);PF01808 (PFAM);G3DSA:3.40.140.20 (GENE3D);G3DSA:3.40.140.20 (GENE3D);G3DSA:3.40.50.1380 (GENE3D);TIGR00355 (TIGRFAM);PF02142 (PFAM);PTHR11692 (PANTHER);SIGNAL_PEPTIDE (PHOBIUS);SIGNAL_PEPTIDE_H_REGION (PHOBIUS);SIGNAL_PEPTIDE_C_REGION (PHOBIUS);NON_CYTOPLASMIC_DOMAIN (PHOBIUS);SIGNAL_PEPTIDE_N_REGION (PHOBIUS);MF_00139 (HAMAP);SignalP-TM (SIGNAL…	GO:0004643/GO:0003937/GO:0006164;GO:0004643/GO:0003937/GO:0006164;GO:0004643/GO:0003937/GO:0006164;GO:0004643/GO:0003937/GO:0006164;GO:0004643/GO:0003937/GO:0006164;GO:0004643/GO:0003937/GO:0006164;GO:0003824	phosphoribosylaminoimidazolecarboxamide formyltransferase activity/IMP cyclohydrolase activity/purine nucleotide biosynthetic process;phosphoribosylaminoimidazolecarboxamide formyltransferase activity/IMP cyclohydrolase activity/purine nucleotide biosynthetic process;phosphoribosylaminoimidazolecarboxamide formyltransferase activity/IMP cyclohydrolase activity/purine nucleotide biosynthetic proce…	Molecular Function/Molecular Function/Biological Process;Molecular Function/Molecular Function/Biological Process;Molecular Function/Molecular Function/Biological Process;Molecular Function/Molecular Function/Biological Process;Molecular Function/Molecular Function/Biological Process;Molecular Function/Molecular Function/Biological Process;Molecular Function	MS-DArT_site_1565|MS-DArT_site_1566	0
Eucgr.A00717	Chr01	13902619	13913241	+	PTHR23092:SF30 - NUCLEOTIDYLTRANSFERASE FAMILY PROTEIN-RELATED (1 of 2) & NT domain of poly(A) polymerase and terminal uridylyl transferase-containing		2.7.7.19	Polynucleotide adenylyltransferase.	G3DSA:3.30.460.10 (GENE3D);PTHR23092 (PANTHER);PTHR23092:SF30 (PANTHER);NON_CYTOPLASMIC_DOMAIN (PHOBIUS);SIGNAL_PEPTIDE_C_REGION (PHOBIUS);SIGNAL_PEPTIDE (PHOBIUS);SIGNAL_PEPTIDE_H_REGION (PHOBIUS);SIGNAL_PEPTIDE_N_REGION (PHOBIUS);SignalP-TM (SIGNALP_GRAM_POSITIVE);SSF81301 (SUPERFAMILY);SSF81631 (SUPERFAMILY)				MS-DArT_site_1599	0
Eucgr.A00690	Chr01	14305972	14307407	-	K07198 - 5'-AMP-activated protein kinase, catalytic alpha subunit (PRKAA, AMPK) (1 of 6) & CBL-interacting kinase 2-like	GO:0007165 & GO:0005524 & GO:0016021 & GO:0004674 & GO:0006468	2.7.11.1 & 2.7.11	Non-specific serine/threonine protein kinase. & Transferring phosphorus-containing groups	SM00220 (SMART);PF00069 (PFAM);G3DSA:1.10.510.10 (GENE3D);G3DSA:3.30.310.80 (GENE3D);PF03822 (PFAM);G3DSA:3.30.200.20 (GENE3D);PTHR24347:SF215 (PANTHER);PTHR24347 (PANTHER);PS00107 (PROSITE_PATTERNS);PS00108 (PROSITE_PATTERNS);CYTOPLASMIC_DOMAIN (PHOBIUS);NON_CYTOPLASMIC_DOMAIN (PHOBIUS);TRANSMEMBRANE (PHOBIUS);PS50011 (PROSITE_PROFILES);PS50816 (PROSITE_PROFILES);SSF56112 (SUPERFAMILY)	GO:0005524/GO:0004672/GO:0006468;GO:0005524/GO:0004672/GO:0006468;GO:0007165;GO:0005524;GO:0004672/GO:0006468;GO:0005524/GO:0004672/GO:0006468;GO:0007165	ATP binding/protein kinase activity/protein phosphorylation;ATP binding/protein kinase activity/protein phosphorylation;signal transduction;ATP binding;protein kinase activity/protein phosphorylation;ATP binding/protein kinase activity/protein phosphorylation;signal transduction	Molecular Function/Molecular Function/Biological Process;Molecular Function/Molecular Function/Biological Process;Biological Process;Molecular Function;Molecular Function/Biological Process;Molecular Function/Molecular Function/Biological Process;Biological Process	MS-DArT_site_1637	0
Eucgr.A00647	Chr01	15345848	15352996	-	PTHR13856:SF75 - ENTH/VHS/GAT FAMILY PROTEIN (1 of 1) & TOM1 2	GO:0006886, GO:0005622 & GO:0006886 & GO:0005622			SM00288 (SMART);G3DSA:1.20.58.160 (GENE3D);G3DSA:1.25.40.90 (GENE3D);PF03127 (PFAM);PF00790 (PFAM);PTHR13856 (PANTHER);PTHR13856:SF75 (PANTHER);PS50179 (PROSITE_PROFILES);PS50909 (PROSITE_PROFILES);SSF89009 (SUPERFAMILY);SSF48464 (SUPERFAMILY)	GO:0006886;GO:0005622/GO:0006886;GO:0005622/GO:0006886;GO:0006886;GO:0006886;GO:0005622/GO:0006886	intracellular protein transport;intracellular/intracellular protein transport;intracellular/intracellular protein transport;intracellular protein transport;intracellular protein transport;intracellular/intracellular protein transport	Biological Process;Cellular Component/Biological Process;Cellular Component/Biological Process;Biological Process;Biological Process;Cellular Component/Biological Process	MS-DArT_site_1731|MS-DArT_site_1732	0
Eucgr.A00643	Chr01	15413461	15428113	+	6.3.2.4 - D-alanine--D-alanine ligase / D-alanylalanine synthetase (1 of 1), & D-alanine-D-alanine ligase	GO:0008716, GO:0005737 & GO:0005524 & GO:0008716 & GO:0009507 & GO:0046872	6.3.2.4	D-alanine--D-alanine ligase. & D-alanine--D-alanine ligase	PF01820 (PFAM);PF07478 (PFAM);G3DSA:3.30.1490.20 (GENE3D);G3DSA:3.30.470.20 (GENE3D);G3DSA:3.40.50.20 (GENE3D);G3DSA:3.30.470.20 (GENE3D);PTHR23132 (PANTHER);PTHR23132:SF0 (PANTHER);PS00844 (PROSITE_PATTERNS);PS00843 (PROSITE_PATTERNS);NON_CYTOPLASMIC_DOMAIN (PHOBIUS);SIGNAL_PEPTIDE (PHOBIUS);SIGNAL_PEPTIDE_C_REGION (PHOBIUS);SIGNAL_PEPTIDE_N_REGION (PHOBIUS);SIGNAL_PEPTIDE_H_REGION (PHOBIUS);PS5…	GO:0008716;GO:0005524/GO:0003824;GO:0005524;GO:0005524;GO:0005524/GO:0046872	D-alanine-D-alanine ligase activity;ATP binding/catalytic activity;ATP binding;ATP binding;ATP binding/metal ion binding	Molecular Function;Molecular Function/Molecular Function;Molecular Function;Molecular Function;Molecular Function/Molecular Function	MS-DArT_site_1738|MS-DArT_site_1739	0
Eucgr.A00642	Chr01	15429467	15435017	+	2.1.2.2 - Phosphoribosylglycinamide formyltransferase / Glycinamide ribonucleotide transformylase (1 of 1) & phosphoribosylglycinamide chloroplastic	GO:0016742, GO:0009058 & GO:0004644 & GO:0009507 & GO:0016021 & GO:0006189	2.1.2.2	Phosphoribosylglycinamide formyltransferase. & Phosphoribosylglycinamide formyltransferase	PF00551 (PFAM);G3DSA:3.40.50.170 (GENE3D);TIGR00639 (TIGRFAM);PTHR10520:SF9 (PANTHER);PTHR10520 (PANTHER);PS00373 (PROSITE_PATTERNS);MF_01930 (HAMAP);SSF53328 (SUPERFAMILY)	GO:0016742/GO:0009058;GO:0016742/GO:0009058;GO:0004644/GO:0006189;GO:0004644/GO:0006189;GO:0016742/GO:0009058	hydroxymethyl-, formyl- and related transferase activity/biosynthetic process;hydroxymethyl-, formyl- and related transferase activity/biosynthetic process;phosphoribosylglycinamide formyltransferase activity/'de novo' IMP biosynthetic process;phosphoribosylglycinamide formyltransferase activity/'de novo' IMP biosynthetic process;hydroxymethyl-, formyl- and related transferase activity/biosynthet…	Molecular Function/Biological Process;Molecular Function/Biological Process;Molecular Function/Biological Process;Molecular Function/Biological Process;Molecular Function/Biological Process	MS-DArT_site_1741	0
Eucgr.A00636	Chr01	15527170	15531755	+	sel1-like repeat-containing L18				SM00671 (SMART);G3DSA:1.25.40.10 (GENE3D);PTHR36792:SF2 (PANTHER);PTHR36792 (PANTHER);SSF81901 (SUPERFAMILY)	GO:0005515	protein binding	Molecular Function	MS-DArT_site_1747	0
Eucgr.A00608	Chr01	15917952	15921339	-	K02987 - small subunit ribosomal protein S4e (RP-S4e, RPS4) (1 of 3) & 40S ribosomal S4-3	GO:0003723, GO:0006412, GO:0005840, GO:0005622, GO:0003735 & GO:0003735 & GO:0022627 & GO:0019843 & GO:0006412			SM00363 (SMART);SM00739 (SMART);PIRSF002116 (PIRSF);PF00900 (PFAM);PF01479 (PFAM);PF08071 (PFAM);PF16121 (PFAM);PF00467 (PFAM);PTHR11581 (PANTHER);PS00528 (PROSITE_PATTERNS);PD002667 (PRODOM);PS50889 (PROSITE_PROFILES);MF_00485 (HAMAP)	GO:0003723;GO:0005840/GO:0005622/GO:0003735/GO:0006412;GO:0003723;GO:0005840/GO:0005622/GO:0003735/GO:0006412;GO:0003723;GO:0005840/GO:0005622/GO:0003735/GO:0006412	RNA binding;ribosome/intracellular/structural constituent of ribosome/translation;RNA binding;ribosome/intracellular/structural constituent of ribosome/translation;RNA binding;ribosome/intracellular/structural constituent of ribosome/translation	Molecular Function;Cellular Component/Cellular Component/Molecular Function/Biological Process;Molecular Function;Cellular Component/Cellular Component/Molecular Function/Biological Process;Molecular Function;Cellular Component/Cellular Component/Molecular Function/Biological Process	MS-DArT_site_1795	0
Eucgr.A00607	Chr01	15925812	15929687	-	PF14237 - Domain of unknown function (DUF4339) (DUF4339) (1 of 3) & TIC chloroplastic	GO:0009706 & GO:0008565 & GO:0008168 & GO:0045037 & GO:0032259			Coil (COILS);Coil (COILS);PF14237 (PFAM);PTHR37755 (PANTHER)				MS-DArT_site_1797	0
Eucgr.A00600	Chr01	16026746	16031553	-	K14293 - importin subunit beta-1 (KPNB1) (1 of 2) & importin subunit beta-1-like	GO:0008536, GO:0006886 & GO:0031965 & GO:0005737 & GO:0000060 & GO:0006607 & GO:0008565 & GO:0034399 & GO:0008536 & GO:0000059 & GO:0008139 & GO:0006610			SM00913 (SMART);PF03810 (PFAM);G3DSA:1.25.10.10 (GENE3D);PF13513 (PFAM);PTHR10527:SF19 (PANTHER);PTHR10527 (PANTHER);SIGNAL_PEPTIDE_C_REGION (PHOBIUS);NON_CYTOPLASMIC_DOMAIN (PHOBIUS);SIGNAL_PEPTIDE_H_REGION (PHOBIUS);SIGNAL_PEPTIDE_N_REGION (PHOBIUS);SIGNAL_PEPTIDE (PHOBIUS);PS50166 (PROSITE_PROFILES);SSF48371 (SUPERFAMILY)	GO:0006886/GO:0008536;GO:0006886/GO:0008536;GO:0008565/GO:0006913;GO:0006886/GO:0008536;GO:0005488	intracellular protein transport/Ran GTPase binding;intracellular protein transport/Ran GTPase binding;protein transporter activity/nucleocytoplasmic transport;intracellular protein transport/Ran GTPase binding;binding	Biological Process/Molecular Function;Biological Process/Molecular Function;Molecular Function/Biological Process;Biological Process/Molecular Function;Molecular Function	MS-DArT_site_1814	0
Eucgr.A00568	Chr01	16432344	16435865	-	PTHR27004:SF37 - DISEASE RESISTANCE FAMILY PROTEIN/LRR FAMILY PROTEIN-RELATED (1 of 23) & receptor 12	GO:0005515 & GO:0016021			PR00019 (PRINTS);SM00369 (SMART);G3DSA:3.80.10.10 (GENE3D);PF00560 (PFAM);PF13855 (PFAM);G3DSA:3.80.10.10 (GENE3D);G3DSA:3.80.10.10 (GENE3D);PTHR27004:SF37 (PANTHER);PTHR27004 (PANTHER);SIGNAL_PEPTIDE_C_REGION (PHOBIUS);CYTOPLASMIC_DOMAIN (PHOBIUS);SIGNAL_PEPTIDE (PHOBIUS);SIGNAL_PEPTIDE_H_REGION (PHOBIUS);TRANSMEMBRANE (PHOBIUS);NON_CYTOPLASMIC_DOMAIN (PHOBIUS);SIGNAL_PEPTIDE_N_REGION (PHOBIUS);…	GO:0005515;GO:0005515;GO:0005515	protein binding;protein binding;protein binding	Molecular Function;Molecular Function;Molecular Function	MS-DArT_site_1866	0
Eucgr.A00553	Chr01	16596539	16599472	-	KOG3623 - Homeobox transcription factor SIP1 (1 of 1) & transcription factor IIIA	GO:0003676 & GO:0046872			SM00355 (SMART);G3DSA:3.30.160.60 (GENE3D);G3DSA:3.30.160.60 (GENE3D);G3DSA:3.30.160.60 (GENE3D);G3DSA:3.30.160.60 (GENE3D);G3DSA:3.30.160.60 (GENE3D);PTHR24375:SF106 (PANTHER);PTHR24375 (PANTHER);PS00028 (PROSITE_PATTERNS);PS50157 (PROSITE_PROFILES);SSF57667 (SUPERFAMILY);SSF57667 (SUPERFAMILY);SSF57667 (SUPERFAMILY);SSF57667 (SUPERFAMILY)	GO:0003676;GO:0003676;GO:0003676;GO:0003676;GO:0003676;GO:0046872;GO:0046872	nucleic acid binding;nucleic acid binding;nucleic acid binding;nucleic acid binding;nucleic acid binding;metal ion binding;metal ion binding	Molecular Function;Molecular Function;Molecular Function;Molecular Function;Molecular Function;Molecular Function;Molecular Function	MS-DArT_site_1896	0
Eucgr.A00543	Chr01	16742439	16765031	+	PTHR10997:SF7 - IMPORTIN-11 (1 of 1) & importin-11 isoform X1	GO:0008536, GO:0006886 & GO:0005635 & GO:0005829 & GO:0008565 & GO:0042991 & GO:0008536			SM00913 (SMART);G3DSA:1.25.10.10 (GENE3D);PF03810 (PFAM);PTHR10997:SF7 (PANTHER);PTHR10997 (PANTHER);PS50166 (PROSITE_PROFILES);SSF48371 (SUPERFAMILY)	GO:0006886/GO:0008536;GO:0006886/GO:0008536;GO:0006886/GO:0008536;GO:0005488	intracellular protein transport/Ran GTPase binding;intracellular protein transport/Ran GTPase binding;intracellular protein transport/Ran GTPase binding;binding	Biological Process/Molecular Function;Biological Process/Molecular Function;Biological Process/Molecular Function;Molecular Function	MS-DArT_site_1923,MS-DArT_site_1924	0,0
Eucgr.A00535	Chr01	16927128	16934313	-	2.5.1.62 - Chlorophyll synthase (1 of 1) & chlorophyll chloroplastic	GO:0016021, GO:0004659 & GO:0015995 & GO:0046408 & GO:0016021	2.5.1.62 & 2.5.1	Chlorophyll synthase. & Transferring alkyl or aryl groups, other than methyl groups & Chlorophyll synthase	TIGR02056 (TIGRFAM);PF01040 (PFAM);TIGR01476 (TIGRFAM);PTHR11048 (PANTHER);PTHR11048:SF18 (PANTHER);CYTOPLASMIC_DOMAIN (PHOBIUS);TRANSMEMBRANE (PHOBIUS);CYTOPLASMIC_DOMAIN (PHOBIUS);TRANSMEMBRANE (PHOBIUS);CYTOPLASMIC_DOMAIN (PHOBIUS);CYTOPLASMIC_DOMAIN (PHOBIUS);TRANSMEMBRANE (PHOBIUS);NON_CYTOPLASMIC_DOMAIN (PHOBIUS);TRANSMEMBRANE (PHOBIUS);NON_CYTOPLASMIC_DOMAIN (PHOBIUS);NON_CYTOPLASMIC_DOMAI…	GO:0016021/GO:0015995/GO:0046408;GO:0016021/GO:0016765	integral component of membrane/chlorophyll biosynthetic process/chlorophyll synthetase activity;integral component of membrane/transferase activity, transferring alkyl or aryl (other than methyl) groups	Cellular Component/Biological Process/Molecular Function;Cellular Component/Molecular Function	MS-DArT_site_1950	0
Eucgr.A00534	Chr01	16945441	16957851	+	3.5.4.17 - Adenosine-phosphate deaminase (1 of 1) & AMP deaminase	GO:0019239, GO:0032264, GO:0003876 & GO:0031307 & GO:0005634 & GO:0003876 & GO:0009737 & GO:0009793 & GO:0032264 & GO:0005829 & GO:0043424	3.5.4.6, 3.5.4.17 & 3.5.4.17 & 3.5.4.6	AMP deaminase., Adenosine-phosphate deaminase. & Adenosine-phosphate deaminase & AMP deaminase	PF00962 (PFAM);TIGR01429 (TIGRFAM);G3DSA:3.20.20.140 (GENE3D);PTHR11359:SF8 (PANTHER);PTHR11359 (PANTHER);PS00485 (PROSITE_PATTERNS);CYTOPLASMIC_DOMAIN (PHOBIUS);TRANSMEMBRANE (PHOBIUS);NON_CYTOPLASMIC_DOMAIN (PHOBIUS);SSF51556 (SUPERFAMILY);TMhelix (TMHMM)	GO:0019239;GO:0003876/GO:0032264;GO:0003876/GO:0032264;GO:0009168/GO:0019239	deaminase activity;AMP deaminase activity/IMP salvage;AMP deaminase activity/IMP salvage;purine ribonucleoside monophosphate biosynthetic process/deaminase activity	Molecular Function;Molecular Function/Biological Process;Molecular Function/Biological Process;Biological Process/Molecular Function	MS-DArT_site_1952,MS-DArT_site_1953,MS-DArT_site_1954|MS-DArT_site_1955	0,0,0
Eucgr.A00531	Chr01	16981279	16982835	-	DNA double-strand break repair rad50 isoform 1				PTHR35117 (PANTHER)				MS-DArT_site_1963|MS-DArT_site_1965	0
Eucgr.A00516	Chr01	17476923	17481007	-	K06119 - sulfoquinovosyltransferase (SQD2) (1 of 1) & sulfoquinovosyl transferase SQD2	GO:0016757			PF13439 (PFAM);G3DSA:3.40.50.2000 (GENE3D);PF00534 (PFAM);PTHR12526 (PANTHER);PTHR12526:SF340 (PANTHER);CYTOPLASMIC_DOMAIN (PHOBIUS);NON_CYTOPLASMIC_DOMAIN (PHOBIUS);NON_CYTOPLASMIC_DOMAIN (PHOBIUS);CYTOPLASMIC_DOMAIN (PHOBIUS);TRANSMEMBRANE (PHOBIUS);TRANSMEMBRANE (PHOBIUS);TRANSMEMBRANE (PHOBIUS);SSF53756 (SUPERFAMILY)				MS-DArT_site_2000	0
Eucgr.A00509	Chr01	17633002	17635870	+	KOG4031 - Vesicle coat protein clathrin, light chain (1 of 1) & clathrin light chain 2-like	GO:0030132, GO:0030130, GO:0016192, GO:0006886, GO:0005198 & GO:0032050 & GO:0072583 & GO:0030130 & GO:0009941 & GO:0030132 & GO:0005198 & GO:0006886 & GO:0009504			Coil (COILS);PF01086 (PFAM);PTHR10639:SF10 (PANTHER);PTHR10639 (PANTHER)	GO:0006886/GO:0016192/GO:0005198/GO:0030130/GO:0030132;GO:0006886/GO:0016192/GO:0005198/GO:0030130/GO:0030132	intracellular protein transport/vesicle-mediated transport/structural molecule activity/clathrin coat of trans-Golgi network vesicle/clathrin coat of coated pit;intracellular protein transport/vesicle-mediated transport/structural molecule activity/clathrin coat of trans-Golgi network vesicle/clathrin coat of coated pit	Biological Process/Biological Process/Molecular Function/Cellular Component/Cellular Component;Biological Process/Biological Process/Molecular Function/Cellular Component/Cellular Component	MS-DArT_site_2008	0
Eucgr.B02817	Chr01	19737696	19741718	-	PTHR14614:SF42 - S-ADENOSYL-L-METHIONINE-DEPENDENT METHYLTRANSFERASE FAMILY PROTEIN (1 of 2) & N-methyltransferase NNT1 isoform X1	GO:0008168 & GO:0032259			G3DSA:3.40.50.150 (GENE3D);PF10294 (PFAM);PTHR14614 (PANTHER);PTHR14614:SF42 (PANTHER);SSF53335 (SUPERFAMILY)				MS-DArT_site_2113	0
Eucgr.B02805	Chr01	19875770	19893902	+	K06100 - symplekin (SYMPK) (1 of 2) & symplekin isoform X1	GO:0009987			PF11935 (PFAM);G3DSA:1.25.10.10 (GENE3D);PTHR15245:SF25 (PANTHER);PTHR15245 (PANTHER);SSF48371 (SUPERFAMILY)	GO:0005488	binding	Molecular Function	MS-DArT_site_2133,MS-DArT_site_2134	0,0
Eucgr.B02769	Chr01	20612393	20621622	-	K01962 - acetyl-CoA carboxylase carboxyl transferase subunit alpha (accA) (1 of 3) & acetyl-coenzyme A carboxylase carboxyl transferase subunit chloroplastic	GO:0003989 & GO:0016740 & GO:0006633 & GO:0009317	6.4.1.2 & 6.4.1	Acetyl-CoA carboxylase. & Forming carbon-carbon bonds & Acetyl-CoA carboxylase	Coil (COILS);Coil (COILS);Coil (COILS);PR01069 (PRINTS);TIGR00513 (TIGRFAM);PF03255 (PFAM);G3DSA:3.90.226.10 (GENE3D);PTHR22855:SF38 (PANTHER);PTHR22855 (PANTHER);MF_00823 (HAMAP);PS50989 (PROSITE_PROFILES);SSF52096 (SUPERFAMILY)	GO:0003989/GO:0009317/GO:0006633;GO:0003989/GO:0009317/GO:0006633;GO:0003989/GO:0009317/GO:0006633;GO:0003989/GO:0009317/GO:0006633;GO:0016874	acetyl-CoA carboxylase activity/acetyl-CoA carboxylase complex/fatty acid biosynthetic process;acetyl-CoA carboxylase activity/acetyl-CoA carboxylase complex/fatty acid biosynthetic process;acetyl-CoA carboxylase activity/acetyl-CoA carboxylase complex/fatty acid biosynthetic process;acetyl-CoA carboxylase activity/acetyl-CoA carboxylase complex/fatty acid biosynthetic process;ligase activity	Molecular Function/Cellular Component/Biological Process;Molecular Function/Cellular Component/Biological Process;Molecular Function/Cellular Component/Biological Process;Molecular Function/Cellular Component/Biological Process;Molecular Function	MS-DArT_site_2195	0
Eucgr.B02747	Chr01	20929730	20935376	-	PTHR27001:SF201 - PROTEIN KINASE PROTEIN WITH TETRATRICOPEPTIDE REPEAT DOMAIN (1 of 2) & probable serine threonine- kinase At5g41260	GO:0006468, GO:0004672 & GO:0005524 & GO:0004672 & GO:0006468	2.7.11.1, 2.7.10.2	Non-specific serine/threonine protein kinase., Non-specific protein-tyrosine kinase.	PF07714 (PFAM);G3DSA:1.25.40.10 (GENE3D);G3DSA:1.10.510.10 (GENE3D);G3DSA:3.30.200.20 (GENE3D);PTHR27001 (PANTHER);PTHR27001:SF201 (PANTHER);PTHR27001:SF201 (PANTHER);PTHR27001 (PANTHER);SIGNAL_PEPTIDE (PHOBIUS);SIGNAL_PEPTIDE_C_REGION (PHOBIUS);SIGNAL_PEPTIDE_H_REGION (PHOBIUS);NON_CYTOPLASMIC_DOMAIN (PHOBIUS);SIGNAL_PEPTIDE_N_REGION (PHOBIUS);PS50011 (PROSITE_PROFILES);SignalP-noTM (SIGNALP_EUK…	GO:0004672/GO:0006468;GO:0005515;GO:0005524/GO:0006468/GO:0004672;GO:0005515	protein kinase activity/protein phosphorylation;protein binding;ATP binding/protein phosphorylation/protein kinase activity;protein binding	Molecular Function/Biological Process;Molecular Function;Molecular Function/Biological Process/Molecular Function;Molecular Function	MS-DArT_site_2231	0
Eucgr.B02721	Chr01	21313611	21318306	-	PF11891 - Domain of unknown function (DUF3411) (DUF3411) (1 of 9) & chloroplastic	GO:0048366 & GO:0009941 & GO:0016021 & GO:0008643 & GO:0000302 & GO:0009648			PF11891 (PFAM);PTHR31038 (PANTHER);PTHR31038:SF1 (PANTHER);NON_CYTOPLASMIC_DOMAIN (PHOBIUS);CYTOPLASMIC_DOMAIN (PHOBIUS);TRANSMEMBRANE (PHOBIUS);TRANSMEMBRANE (PHOBIUS);CYTOPLASMIC_DOMAIN (PHOBIUS);TMhelix (TMHMM);TMhelix (TMHMM)				MS-DArT_site_2282	0
Eucgr.B02720	Chr01	21355382	21360664	+	PTHR12859 - PRA1 PROTEIN (1 of 2), & PRA1 family A1-like	GO:0016021			PF03208 (PFAM);PTHR12859 (PANTHER);TRANSMEMBRANE (PHOBIUS);NON_CYTOPLASMIC_DOMAIN (PHOBIUS);CYTOPLASMIC_DOMAIN (PHOBIUS);TRANSMEMBRANE (PHOBIUS);CYTOPLASMIC_DOMAIN (PHOBIUS);NON_CYTOPLASMIC_DOMAIN (PHOBIUS);CYTOPLASMIC_DOMAIN (PHOBIUS);TRANSMEMBRANE (PHOBIUS);TRANSMEMBRANE (PHOBIUS);TMhelix (TMHMM);TMhelix (TMHMM);TMhelix (TMHMM)				MS-DArT_site_2289,MS-DArT_site_2288	0,0
Eucgr.B02710	Chr01	21587348	21592597	+	PF04535 - Domain of unknown function (DUF588) (DUF588) (1 of 30) & CASP 5B2	GO:0016021 & GO:0005886			PF04535 (PFAM);PTHR32021 (PANTHER);PTHR32021:SF0 (PANTHER);NON_CYTOPLASMIC_DOMAIN (PHOBIUS);TRANSMEMBRANE (PHOBIUS);CYTOPLASMIC_DOMAIN (PHOBIUS);CYTOPLASMIC_DOMAIN (PHOBIUS);NON_CYTOPLASMIC_DOMAIN (PHOBIUS);CYTOPLASMIC_DOMAIN (PHOBIUS);TRANSMEMBRANE (PHOBIUS);TRANSMEMBRANE (PHOBIUS);TRANSMEMBRANE (PHOBIUS);TMhelix (TMHMM);TMhelix (TMHMM);TMhelix (TMHMM);TMhelix (TMHMM)				MS-DArT_site_2300,MS-DArT_site_2299	0,0
Eucgr.A01266	Chr01	22239195	22263297	+	PTHR21497 - UBIQUITIN LIGASE E3 ALPHA-RELATED (1 of 1) & E3 ubiquitin- ligase PRT6	GO:0008270	3.4.17.20	Carboxypeptidase U.	SM00396 (SMART);G3DSA:3.30.40.10 (GENE3D);PF02207 (PFAM);PTHR21497 (PANTHER);PTHR21497:SF24 (PANTHER);NON_CYTOPLASMIC_DOMAIN (PHOBIUS);TRANSMEMBRANE (PHOBIUS);CYTOPLASMIC_DOMAIN (PHOBIUS);PS51157 (PROSITE_PROFILES);SSF46785 (SUPERFAMILY)	GO:0008270;GO:0008270;GO:0008270	zinc ion binding;zinc ion binding;zinc ion binding	Molecular Function;Molecular Function;Molecular Function	MS-DArT_site_2380,MS-DArT_site_2381	0,0
Eucgr.A01263	Chr01	22288527	22291500	+	PTHR24115:SF462 - KINESIN-LIKE PROTEIN KIF22 (1 of 1) & kinesin KIF22	GO:0008017, GO:0007018, GO:0005524, GO:0003777, GO:0005871 & GO:0016887 & GO:0005524 & GO:0003777 & GO:0005871 & GO:0007018 & GO:0005874 & GO:0008017	3.6.4.4 & 3.6.1 & 3.6.1.3 & 3.6.1.15	Plus-end-directed kinesin ATPase. & Acting on acid anhydrides & Adenosinetriphosphatase & Nucleoside-triphosphate phosphatase	PR00380 (PRINTS);SM00129 (SMART);G3DSA:3.40.850.10 (GENE3D);PF00225 (PFAM);PTHR24115:SF462 (PANTHER);PTHR24115 (PANTHER);PTHR24115:SF462 (PANTHER);PS00411 (PROSITE_PATTERNS);PS50067 (PROSITE_PROFILES);SSF52540 (SUPERFAMILY)	GO:0008017/GO:0007018/GO:0005524/GO:0003777;GO:0008017/GO:0007018/GO:0005524/GO:0003777;GO:0008017/GO:0007018/GO:0005524/GO:0003777;GO:0008017/GO:0007018/GO:0005524/GO:0003777;GO:0003777/GO:0007018;GO:0003777/GO:0005524/GO:0007018;GO:0008017/GO:0007018/GO:0005524/GO:0003777	microtubule binding/microtubule-based movement/ATP binding/microtubule motor activity;microtubule binding/microtubule-based movement/ATP binding/microtubule motor activity;microtubule binding/microtubule-based movement/ATP binding/microtubule motor activity;microtubule binding/microtubule-based movement/ATP binding/microtubule motor activity;microtubule motor activity/microtubule-based movement;m…	Molecular Function/Biological Process/Molecular Function/Molecular Function;Molecular Function/Biological Process/Molecular Function/Molecular Function;Molecular Function/Biological Process/Molecular Function/Molecular Function;Molecular Function/Biological Process/Molecular Function/Molecular Function;Molecular Function/Biological Process;Molecular Function/Molecular Function/Biological Process;…	MS-DArT_site_2387	0
Eucgr.A01178	Chr01	24471457	24480151	+	PTHR11254:SF350 - E3 UBIQUITIN-PROTEIN LIGASE UPL4 (1 of 1) & E3 ubiquitin- ligase UPL4	GO:0004842 & GO:0005634 & GO:0005737 & GO:0016874 & GO:0042787	6.3.2.19	Ubiquitin--protein ligase.	SM00119 (SMART);SM00185 (SMART);G3DSA:1.25.10.10 (GENE3D);PF00632 (PFAM);PTHR11254:SF350 (PANTHER);PTHR11254 (PANTHER);PS50237 (PROSITE_PROFILES);SSF48371 (SUPERFAMILY);SSF56204 (SUPERFAMILY)	GO:0004842;GO:0005515;GO:0004842;GO:0004842;GO:0005488;GO:0004842	ubiquitin-protein transferase activity;protein binding;ubiquitin-protein transferase activity;ubiquitin-protein transferase activity;binding;ubiquitin-protein transferase activity	Molecular Function;Molecular Function;Molecular Function;Molecular Function;Molecular Function;Molecular Function	MS-DArT_site_2584,MS-DArT_site_2583	0,0
Eucgr.A01177	Chr01	24487742	24497251	-	K10737 - DNA helicase MCM8 [EC:3.6.4.12] (MCM8) (1 of 1) & probable DNA helicase MCM8 isoform X1	GO:0006260, GO:0005524, GO:0003677 & GO:0005634 & GO:0003677 & GO:0005524 & GO:0006270 & GO:0008094 & GO:0046872 & GO:0007143 & GO:0007140 & GO:0000724 & GO:0009555 & GO:0004386	3.6.4.12 & 3.6.1 & 3.6.1.3 & 3.6.1.15	DNA helicase. & Acting on acid anhydrides & Adenosinetriphosphatase & Nucleoside-triphosphate phosphatase	Coil (COILS);PR01657 (PRINTS);SM00382 (SMART);SM00350 (SMART);G3DSA:2.40.50.140 (GENE3D);PF17207 (PFAM);PF00493 (PFAM);G3DSA:3.40.50.300 (GENE3D);PTHR11630:SF47 (PANTHER);PTHR11630 (PANTHER);PTHR11630 (PANTHER);PS50051 (PROSITE_PROFILES);SSF50249 (SUPERFAMILY);SSF52540 (SUPERFAMILY)	GO:0006260/GO:0005524/GO:0003677;GO:0006260/GO:0005524/GO:0003677;GO:0006260/GO:0005524/GO:0003677	DNA replication/ATP binding/DNA binding;DNA replication/ATP binding/DNA binding;DNA replication/ATP binding/DNA binding	Biological Process/Molecular Function/Molecular Function;Biological Process/Molecular Function/Molecular Function;Biological Process/Molecular Function/Molecular Function	MS-DArT_site_2587,MS-DArT_site_2588|MS-DArT_site_2589	0,0
Eucgr.A01168	Chr01	24607073	24609841	-	PF04689 - DNA binding protein S1FA (S1FA) (1 of 1) & ---NA---	GO:0006355, GO:0005634, GO:0003677			PF04689 (PFAM);PTHR35298 (PANTHER);NON_CYTOPLASMIC_DOMAIN (PHOBIUS);TRANSMEMBRANE (PHOBIUS);CYTOPLASMIC_DOMAIN (PHOBIUS);TMhelix (TMHMM)	GO:0005634/GO:0006355/GO:0003677	nucleus/regulation of transcription, DNA-templated/DNA binding	Cellular Component/Biological Process/Molecular Function	MS-DArT_site_2607	0
Eucgr.A01669	Chr01	25670827	25677360	+	PTHR10343:SF60 - SNF1 PROTEIN KINASE SUBUNIT BETA-2-RELATED (1 of 1) & 5\ -AMP-activated kinase- isoform 1				Coil (COILS);PF16561 (PFAM);PTHR10343 (PANTHER);PTHR10343:SF60 (PANTHER);SSF81296 (SUPERFAMILY)				MS-DArT_site_2697|MS-DArT_site_2698	0
Eucgr.A01618	Chr01	26579460	26587827	-	PTHR23086:SF42 - PHOSPHATIDYLINOSITOL 4-PHOSPHATE 5-KINASE 9 (1 of 1) & phosphatidylinositol 4-phosphate 5-kinase 9	GO:0046488, GO:0016307 & GO:0005634 & GO:0005524 & GO:0005975 & GO:0016308 & GO:0016020 & GO:0005829 & GO:0006520 & GO:0046854	2.7.1.68 & 2.7.1	1-phosphatidylinositol-4-phosphate 5-kinase. & Transferring phosphorus-containing groups & 1-phosphatidylinositol-4-phosphate 5-kinase	SM00330 (SMART);PIRSF037274 (PIRSF);SM00698 (SMART);G3DSA:2.20.110.10 (GENE3D);PF02493 (PFAM);PF01504 (PFAM);G3DSA:3.30.810.10 (GENE3D);G3DSA:3.30.800.10 (GENE3D);PTHR23086:SF42 (PANTHER);PTHR23086 (PANTHER);PS51455 (PROSITE_PROFILES);SSF82185 (SUPERFAMILY);SSF56104 (SUPERFAMILY)	GO:0016307/GO:0046488;GO:0005524/GO:0016308;GO:0016307/GO:0046488;GO:0016307/GO:0046488	phosphatidylinositol phosphate kinase activity/phosphatidylinositol metabolic process;ATP binding/1-phosphatidylinositol-4-phosphate 5-kinase activity;phosphatidylinositol phosphate kinase activity/phosphatidylinositol metabolic process;phosphatidylinositol phosphate kinase activity/phosphatidylinositol metabolic process	Molecular Function/Biological Process;Molecular Function/Molecular Function;Molecular Function/Biological Process;Molecular Function/Biological Process	MS-DArT_site_2791	0
Eucgr.A01617	Chr01	26596143	26608035	-	PTHR20852:SF16 - TYPE-1 GLUTAMINE SYNTHETASE 1 (1 of 1) & fluG	GO:0016787, GO:0006807, GO:0004356 & GO:0048829 & GO:0009737 & GO:0005829 & GO:0006542 & GO:0043015 & GO:0043621 & GO:0004356 & GO:0008017 & GO:0016787 & GO:0010311	6.3.1.2 & 6.3.1	Glutamate--ammonia ligase. & Forming carbon-nitrogen bonds & Glutamine synthetase	SM01230 (SMART);G3DSA:3.30.590.10 (GENE3D);G3DSA:3.20.20.140 (GENE3D);PF04909 (PFAM);PF16952 (PFAM);PF00120 (PFAM);PTHR20852 (PANTHER);PTHR20852:SF16 (PANTHER);SSF55931 (SUPERFAMILY);SSF51556 (SUPERFAMILY);SSF54368 (SUPERFAMILY)	GO:0006807/GO:0004356;GO:0003824;GO:0016787;GO:0004356/GO:0006542/GO:0006807;GO:0006807/GO:0004356;GO:0004356/GO:0006542/GO:0006807	nitrogen compound metabolic process/glutamate-ammonia ligase activity;catalytic activity;hydrolase activity;glutamate-ammonia ligase activity/glutamine biosynthetic process/nitrogen compound metabolic process;nitrogen compound metabolic process/glutamate-ammonia ligase activity;glutamate-ammonia ligase activity/glutamine biosynthetic process/nitrogen compound metabolic process	Biological Process/Molecular Function;Molecular Function;Molecular Function;Molecular Function/Biological Process/Biological Process;Biological Process/Molecular Function;Molecular Function/Biological Process/Biological Process	MS-DArT_site_2794	0
Eucgr.A01604	Chr01	26829706	26840754	-	PTHR24098:SF5 - ACYL-COA N-ACYLTRANSFERASE WITH RING/FYVE/PHD-TYPE ZINC FINGER DOMAIN-CONTAINING PROTEIN (1 of 2), & increased DNA methylation 1-like isoform X2	GO:0005515 & GO:0008270	2.3.1.48	Histone acetyltransferase.	SM00249 (SMART);G3DSA:3.30.40.10 (GENE3D);PF16135 (PFAM);PF00628 (PFAM);PTHR24098 (PANTHER);PTHR24098:SF5 (PANTHER);PS01359 (PROSITE_PATTERNS);NON_CYTOPLASMIC_DOMAIN (PHOBIUS);CYTOPLASMIC_DOMAIN (PHOBIUS);TRANSMEMBRANE (PHOBIUS);PS50016 (PROSITE_PROFILES);SSF57903 (SUPERFAMILY);SSF57903 (SUPERFAMILY)	GO:0005515/GO:0008270;GO:0005515;GO:0005515	protein binding/zinc ion binding;protein binding;protein binding	Molecular Function/Molecular Function;Molecular Function;Molecular Function	MS-DArT_site_2820|MS-DArT_site_2821	0
Eucgr.A01593	Chr01	27088486	27092501	+	K12185 - ESCRT-I complex subunit VPS37 (VPS37) (1 of 1) & vacuolar -sorting-associated 37 homolog 1				Coil (COILS);Coil (COILS);PF07200 (PFAM);PTHR13678 (PANTHER);PS51314 (PROSITE_PROFILES);SSF140111 (SUPERFAMILY)				MS-DArT_site_2846	0
Eucgr.A01592	Chr01	27104936	27111321	+	PTHR13683:SF350 - EUKARYOTIC ASPARTYL PROTEASE FAMILY PROTEIN (1 of 1) & aspartic ase 2	GO:0006508, GO:0004190 & GO:0004190 & GO:0006508 & GO:0016021	3.4.23.12 & 3.4.23	Nepenthesin. & Acting on peptide bonds (peptidases)	PR00792 (PRINTS);G3DSA:2.40.70.10 (GENE3D);PF14543 (PFAM);PF14541 (PFAM);G3DSA:2.40.70.10 (GENE3D);PTHR13683:SF350 (PANTHER);PTHR13683 (PANTHER);CYTOPLASMIC_DOMAIN (PHOBIUS);SIGNAL_PEPTIDE_N_REGION (PHOBIUS);NON_CYTOPLASMIC_DOMAIN (PHOBIUS);TRANSMEMBRANE (PHOBIUS);SIGNAL_PEPTIDE (PHOBIUS);SIGNAL_PEPTIDE_C_REGION (PHOBIUS);SIGNAL_PEPTIDE_H_REGION (PHOBIUS);PS51767 (PROSITE_PROFILES);SignalP-TM (SI…	GO:0006508/GO:0004190;GO:0006508/GO:0004190	proteolysis/aspartic-type endopeptidase activity;proteolysis/aspartic-type endopeptidase activity	Biological Process/Molecular Function;Biological Process/Molecular Function	MS-DArT_site_2852	0
Eucgr.A01591	Chr01	27120375	27125877	+	PTHR24012:SF455 - POLYADENYLATE-BINDING PROTEIN 7 (1 of 2) & polyadenylate-binding 7	GO:0003723, GO:0003676 & GO:0000166 & GO:0003723 & GO:0005737			Coil (COILS);SM00517 (SMART);SM00360 (SMART);SM00361 (SMART);PF00076 (PFAM);TIGR01628 (TIGRFAM);G3DSA:3.30.70.330 (GENE3D);G3DSA:1.10.1900.10 (GENE3D);PF00658 (PFAM);G3DSA:3.30.70.330 (GENE3D);G3DSA:3.30.70.330 (GENE3D);PTHR24012 (PANTHER);PTHR24012:SF455 (PANTHER);PTHR24012:SF455 (PANTHER);PTHR24012 (PANTHER);PTHR24012 (PANTHER);PS50102 (PROSITE_PROFILES);PS50102 (PROSITE_PROFILES);PS50102 (PROS…	GO:0003723;GO:0003676;GO:0003676;GO:0003676;GO:0003723;GO:0000166;GO:0003723;GO:0003723;GO:0000166;GO:0000166;GO:0003676;GO:0003676;GO:0003676;GO:0003676;GO:0003723;GO:0003723;GO:0000166;GO:0000166;GO:0000166	RNA binding;nucleic acid binding;nucleic acid binding;nucleic acid binding;RNA binding;nucleotide binding;RNA binding;RNA binding;nucleotide binding;nucleotide binding;nucleic acid binding;nucleic acid binding;nucleic acid binding;nucleic acid binding;RNA binding;RNA binding;nucleotide binding;nucleotide binding;nucleotide binding	Molecular Function;Molecular Function;Molecular Function;Molecular Function;Molecular Function;Molecular Function;Molecular Function;Molecular Function;Molecular Function;Molecular Function;Molecular Function;Molecular Function;Molecular Function;Molecular Function;Molecular Function;Molecular Function;Molecular Function;Molecular Function;Molecular Function	MS-DArT_site_2855|MS-DArT_site_2856	0
Eucgr.A01564	Chr01	27458187	27461668	-	PF05003 - Protein of unknown function (DUF668) (DUF668) (1 of 15) & PREDICTED: uncharacterized protein LOC104438606 isoform X1				Coil (COILS);PF11961 (PFAM);PF05003 (PFAM);PTHR31371:SF7 (PANTHER);PTHR31371 (PANTHER)				MS-DArT_site_2910,MS-DArT_site_2912	0,0
Eucgr.A01547	Chr01	27788481	27799967	+	PTHR10359:SF22 - DEMETER-LIKE PROTEIN 2-RELATED (1 of 2) & ROS1-like isoform X1	GO:0006284 & GO:0003824 & GO:0051539	4.2.99.18	DNA-(apurinic or apyrimidinic site) lyase.	Coil (COILS);Coil (COILS);SM00525 (SMART);SM00478 (SMART);G3DSA:1.10.1670.10 (GENE3D);PF15629 (PFAM);G3DSA:1.10.340.30 (GENE3D);PF15628 (PFAM);PTHR10359 (PANTHER);PTHR10359:SF22 (PANTHER);PTHR10359 (PANTHER);PTHR10359:SF22 (PANTHER);SSF48150 (SUPERFAMILY)	GO:0051539;GO:0006284;GO:0006281/GO:0003824;GO:0006281/GO:0003824	4 iron, 4 sulfur cluster binding;base-excision repair;DNA repair/catalytic activity;DNA repair/catalytic activity	Molecular Function;Biological Process;Biological Process/Molecular Function;Biological Process/Molecular Function	MS-DArT_site_2957	0
Eucgr.A01538	Chr01	27865106	27868058	+	K01623 - fructose-bisphosphate aldolase, class I (ALDO) (1 of 6), & fructose-bisphosphate aldolase cytoplasmic isozyme	GO:0006096, GO:0004332 & GO:0006096 & GO:0004332	4.1.2.13	Fructose-bisphosphate aldolase. & Fructose-bisphosphate aldolase	G3DSA:3.20.20.70 (GENE3D);PF00274 (PFAM);PTHR11627 (PANTHER);PS00158 (PROSITE_PATTERNS);SignalP-TM (SIGNALP_GRAM_POSITIVE);SSF51569 (SUPERFAMILY)	GO:0003824;GO:0006096/GO:0004332	catalytic activity;glycolytic process/fructose-bisphosphate aldolase activity	Molecular Function;Biological Process/Molecular Function	MS-DArT_site_2968	0
Eucgr.A01533	Chr01	28129058	28151756	-	PTHR10357:SF141 - 1,4-ALPHA-GLUCAN-BRANCHING ENZYME 2-1, CHLOROPLASTIC/AMYLOPLASTIC-RELATED (1 of 1) & 1,4-alpha-glucan-branching enzyme 2- chloroplastic amyloplastic isoform X1	GO:0043169, GO:0005975, GO:0003824, GO:0004553 & GO:0005978 & GO:0003844 & GO:0043169 & GO:0004553	2.4.1.18	1,4-alpha-glucan branching enzyme. & 1,4-alpha-glucan branching enzyme	Coil (COILS);SM00642 (SMART);G3DSA:2.60.40.10 (GENE3D);G3DSA:3.20.20.80 (GENE3D);PF02806 (PFAM);PF02922 (PFAM);PF00128 (PFAM);G3DSA:2.60.40.1180 (GENE3D);PTHR10357:SF141 (PANTHER);PTHR10357 (PANTHER);SSF51445 (SUPERFAMILY);SSF81296 (SUPERFAMILY);SSF51011 (SUPERFAMILY)	GO:0003824/GO:0005975;GO:0005975;GO:0003824/GO:0043169/GO:0005975;GO:0005975/GO:0004553;GO:0003824/GO:0005975;GO:0003824	catalytic activity/carbohydrate metabolic process;carbohydrate metabolic process;catalytic activity/cation binding/carbohydrate metabolic process;carbohydrate metabolic process/hydrolase activity, hydrolyzing O-glycosyl compounds;catalytic activity/carbohydrate metabolic process;catalytic activity	Molecular Function/Biological Process;Biological Process;Molecular Function/Molecular Function/Biological Process;Biological Process/Molecular Function;Molecular Function/Biological Process;Molecular Function	MS-DArT_site_2986,MS-DArT_site_2985	0,0
Eucgr.A01531	Chr01	28158237	28160401	-	KOG0374 - Serine/threonine specific protein phosphatase PP1, catalytic subunit (1 of 10) & calcineurin-like phosphoesterase family	GO:0016787 & GO:0004722 & GO:0070262 & GO:0035970 & GO:0004725 & GO:0005739 & GO:0005829 & GO:0035335	3.1.3.16 & 3.1 & 3.1.3.48 & 3.1.3.41	Phosphoprotein phosphatase. & Protein-serine/threonine phosphatase & Acting on ester bonds & Protein-tyrosine-phosphatase & 4-nitrophenylphosphatase	PF00149 (PFAM);G3DSA:3.60.21.10 (GENE3D);PTHR24032 (PANTHER);SSF56300 (SUPERFAMILY)	GO:0016787	hydrolase activity	Molecular Function	MS-DArT_site_2990	0
Eucgr.A01527	Chr01	28202499	28207196	-	PTHR24351:SF92 - PROTEIN KINASE-RELATED (1 of 1) & Serine threonine- kinase KIPK	GO:0006468, GO:0004672, GO:0005524 & GO:0005634 & GO:0005524 & GO:0005737 & GO:0004674 & GO:0006468 & GO:0005886 & GO:0035556	2.7.11.1 & 2.7.11	Non-specific serine/threonine protein kinase. & Transferring phosphorus-containing groups	SM00220 (SMART);G3DSA:3.30.200.20 (GENE3D);PF00069 (PFAM);G3DSA:1.10.510.10 (GENE3D);PTHR24351 (PANTHER);PTHR24351 (PANTHER);PTHR24351:SF92 (PANTHER);PTHR24351:SF92 (PANTHER);PS00108 (PROSITE_PATTERNS);PS50011 (PROSITE_PROFILES);SSF56112 (SUPERFAMILY)	GO:0006468/GO:0004672/GO:0005524;GO:0006468/GO:0004672/GO:0005524;GO:0004672/GO:0006468;GO:0006468/GO:0004672/GO:0005524	protein phosphorylation/protein kinase activity/ATP binding;protein phosphorylation/protein kinase activity/ATP binding;protein kinase activity/protein phosphorylation;protein phosphorylation/protein kinase activity/ATP binding	Biological Process/Molecular Function/Molecular Function;Biological Process/Molecular Function/Molecular Function;Molecular Function/Biological Process;Biological Process/Molecular Function/Molecular Function	MS-DArT_site_3003	0
Eucgr.A01517	Chr01	28411363	28416549	-	K15287 - solute carrier family 35, member F1/2 (SLC35F1_2) (1 of 3) & solute carrier family 35 member F2 isoform X1	GO:0016021, GO:0006810, & GO:0016021 & GO:0006810			PF06027 (PFAM);PTHR14233:SF13 (PANTHER);PTHR14233 (PANTHER);NON_CYTOPLASMIC_DOMAIN (PHOBIUS);TRANSMEMBRANE (PHOBIUS);TRANSMEMBRANE (PHOBIUS);CYTOPLASMIC_DOMAIN (PHOBIUS);TRANSMEMBRANE (PHOBIUS);TRANSMEMBRANE (PHOBIUS);TRANSMEMBRANE (PHOBIUS);TRANSMEMBRANE (PHOBIUS);TRANSMEMBRANE (PHOBIUS);CYTOPLASMIC_DOMAIN (PHOBIUS);TRANSMEMBRANE (PHOBIUS);TRANSMEMBRANE (PHOBIUS);CYTOPLASMIC_DOMAIN (PHOBIUS);NON…	GO:0006810/GO:0016021	transport/integral component of membrane	Biological Process/Cellular Component	MS-DArT_site_3025	0
Eucgr.A01456	Chr01	29120627	29124301	-	PTHR10315:SF34 - E3 UBIQUITIN-PROTEIN LIGASE SINAT3-RELATED (1 of 3) & E3 ubiquitin- ligase SINAT5	GO:0007275, GO:0006511, GO:0005634 & GO:0005634 & GO:0008270 & GO:0061630 & GO:0043161 & GO:0005737 & GO:0007275 & GO:0006915 & GO:0016874 & GO:0042787	6.3.2.19	Ubiquitin--protein ligase.	G3DSA:2.60.210.10 (GENE3D);PF03145 (PFAM);G3DSA:3.30.40.10 (GENE3D);G3DSA:3.90.890.10 (GENE3D);PTHR10315 (PANTHER);PTHR10315:SF34 (PANTHER);PS51081 (PROSITE_PROFILES);PS50089 (PROSITE_PROFILES);SSF57850 (SUPERFAMILY);SSF49599 (SUPERFAMILY)	GO:0005515;GO:0007275/GO:0005634/GO:0006511;GO:0016567/GO:0004842/GO:0008270;GO:0006511/GO:0005634/GO:0007275;GO:0008270;GO:0005515/GO:0008270;GO:0005515	protein binding;multicellular organism development/nucleus/ubiquitin-dependent protein catabolic process;protein ubiquitination/ubiquitin-protein transferase activity/zinc ion binding;ubiquitin-dependent protein catabolic process/nucleus/multicellular organism development;zinc ion binding;protein binding/zinc ion binding;protein binding	Molecular Function;Biological Process/Cellular Component/Biological Process;Biological Process/Molecular Function/Molecular Function;Biological Process/Cellular Component/Biological Process;Molecular Function;Molecular Function/Molecular Function;Molecular Function	MS-DArT_site_3145	0
Eucgr.A01454	Chr01	29131453	29136893	-	PTHR10933 - IMMUNOGLOBULIN-BINDING PROTEIN 1 (1 of 1), & PP2A regulatory subunit TAP46	GO:0009966 & GO:0005829 & GO:0034047 & GO:0008601 & GO:0051721			Coil (COILS);PF04177 (PFAM);PTHR10933:SF9 (PANTHER);PTHR10933 (PANTHER)	GO:0009966;GO:0009966	regulation of signal transduction;regulation of signal transduction	Biological Process;Biological Process	MS-DArT_site_3149	0
Eucgr.A01449	Chr01	29211123	29216547	-	PTHR10992//PTHR10992:SF699 - ALPHA/BETA HYDROLASE FOLD-CONTAINING PROTEIN // SUBFAMILY NOT NAMED (1 of 2) & aminoacrylate hydrolase	GO:0016020 & GO:0016787	3.1.1.1	Carboxylesterase.	PR00412 (PRINTS);G3DSA:3.40.50.1820 (GENE3D);PF00561 (PFAM);PTHR10992 (PANTHER);PTHR10992:SF699 (PANTHER);SSF53474 (SUPERFAMILY)	GO:0003824	catalytic activity	Molecular Function	MS-DArT_site_3159	0
Eucgr.A01411	Chr01	29444576	29467358	+	K14774 - U3 small nucleolar RNA-associated protein 25 (UTP25, DEF) (1 of 1) & U3 small nucleolar RNA-associated 25 isoform X1	GO:0005634 & GO:0032040 & GO:0000462 & GO:0009793 & GO:0009303 & GO:0034511 & GO:0009553 & GO:0005730 & GO:0019843			G3DSA:3.40.50.300 (GENE3D);PF06862 (PFAM);PTHR12933 (PANTHER)	GO:0005634;GO:0005634	nucleus;nucleus	Cellular Component;Cellular Component	MS-DArT_site_3207	0
Eucgr.A01406	Chr01	29502964	29505901	-	PTHR33231:SF1 - 30S RIBOSOMAL PROTEIN-RELATED (1 of 1) & ribosome-binding factor chloroplastic	GO:0044238 & GO:0009570 & GO:0009534 & GO:0005840			TIGR00741 (TIGRFAM);PF16321 (PFAM);G3DSA:3.30.160.100 (GENE3D);PF02482 (PFAM);PTHR33231 (PANTHER);PTHR33231:SF1 (PANTHER);NON_CYTOPLASMIC_DOMAIN (PHOBIUS);SIGNAL_PEPTIDE (PHOBIUS);SIGNAL_PEPTIDE_C_REGION (PHOBIUS);SIGNAL_PEPTIDE_H_REGION (PHOBIUS);SIGNAL_PEPTIDE_N_REGION (PHOBIUS);SignalP-TM (SIGNALP_GRAM_POSITIVE);SSF69754 (SUPERFAMILY)	GO:0044238;GO:0044238;GO:0044238;GO:0044238	primary metabolic process;primary metabolic process;primary metabolic process;primary metabolic process	Biological Process;Biological Process;Biological Process;Biological Process	MS-DArT_site_3228	0
Eucgr.A01405	Chr01	29511231	29516444	+	K12130 - pseudo-response regulator 5 (PRR5) (1 of 1) & two-component response regulator-like APRR5 isoform X1	GO:0005515, GO:0000160 & GO:0000160 & GO:0005622			SM00448 (SMART);PF00072 (PFAM);G3DSA:3.40.50.2300 (GENE3D);PF06203 (PFAM);PTHR26402 (PANTHER);PTHR26402:SF569 (PANTHER);PS50110 (PROSITE_PROFILES);PS51017 (PROSITE_PROFILES);SSF52172 (SUPERFAMILY)	GO:0000160;GO:0000160;GO:0005515;GO:0000160;GO:0005515	phosphorelay signal transduction system;phosphorelay signal transduction system;protein binding;phosphorelay signal transduction system;protein binding	Biological Process;Biological Process;Molecular Function;Biological Process;Molecular Function	MS-DArT_site_3236	0
Eucgr.A00967	Chr01	29805808	29810602	-	PREDICTED: uncharacterized protein LOC104433997 isoform X2				PTHR34361 (PANTHER);PTHR34361:SF2 (PANTHER)				MS-DArT_site_3267	0
Eucgr.A00989	Chr01	29956174	29960430	-	PTHR13486:SF2 - NOVEL PROTEIN (ZGC:103692) (1 of 1), & hypothetical protein EUGRSUZ_A00989				Coil (COILS);Coil (COILS);PF07052 (PFAM);PTHR13486 (PANTHER);PTHR13486:SF2 (PANTHER)				MS-DArT_site_3300	0
Eucgr.A00991	Chr01	29964670	29970646	-	PTHR13832:SF301 - PROTEIN PHOSPHATASE 2C 32 (1 of 1) & phosphatase 2C 32	GO:0003824, GO:0006470, GO:0004722 & GO:0004722 & GO:0010074 & GO:0006470 & GO:0006355 & GO:0005543 & GO:0005886 & GO:0004741	3.1.3.16 & 3.1 & 3.1.3.43 & 3.1.3.41	Phosphoprotein phosphatase. & Protein-serine/threonine phosphatase & Acting on ester bonds & [Pyruvate dehydrogenase (acetyl-transferring)]-phosphatase & 4-nitrophenylphosphatase	Coil (COILS);SM00332 (SMART);PF00481 (PFAM);G3DSA:3.60.40.10 (GENE3D);PTHR13832:SF301 (PANTHER);PTHR13832 (PANTHER);PS51746 (PROSITE_PROFILES);SSF81606 (SUPERFAMILY)	GO:0003824;GO:0003824;GO:0003824;GO:0004722/GO:0006470;GO:0003824;GO:0003824	catalytic activity;catalytic activity;catalytic activity;protein serine/threonine phosphatase activity/protein dephosphorylation;catalytic activity;catalytic activity	Molecular Function;Molecular Function;Molecular Function;Molecular Function/Biological Process;Molecular Function;Molecular Function	MS-DArT_site_3306	0
Eucgr.A00993	Chr01	29982707	29988913	+	PTHR10566:SF65 - UBIQUINONE BIOSYNTHESIS PROTEIN COQ-8 (1 of 1) & aarF domain-containing kinase 4	GO:0005746 & GO:0017004 & GO:0015996	3.6.3.46	Cadmium-transporting ATPase.	PF03109 (PFAM);PTHR10566:SF65 (PANTHER);PTHR10566 (PANTHER);SSF56112 (SUPERFAMILY)				MS-DArT_site_3310	0
Eucgr.A01014	Chr01	30238730	30242653	-	PTHR24078:SF255 - DNAJ HOMOLOG DNJ-5 (1 of 1) & RADIALIS-like 3	GO:0003677			SM00717 (SMART);PTHR24078:SF255 (PANTHER);PTHR24078 (PANTHER);SSF46689 (SUPERFAMILY)	GO:0003677	DNA binding	Molecular Function	MS-DArT_site_3364|MS-DArT_site_3365	0
Eucgr.A01048	Chr01	30718843	30726619	-	K14300 - nuclear pore complex protein Nup133 (NUP133) (1 of 1) & nuclear pore complex NUP133	GO:0009507			PF03177 (PFAM);PF08801 (PFAM);PTHR13405:SF11 (PANTHER);PTHR13405 (PANTHER);SSF117289 (SUPERFAMILY)				MS-DArT_site_3431	0
Eucgr.A01050	Chr01	30736239	30741617	-	PTHR23323:SF24 - VACUOLAR PROTEIN SORTING-ASSOCIATED PROTEIN 11 HOMOLOG (1 of 1) & vacuolar -sorting-associated 11 homolog	GO:0016192, GO:0006886 & GO:0007040 & GO:0009705 & GO:0008270 & GO:0005768 & GO:0035542 & GO:0007032 & GO:0006904 & GO:0006886 & GO:0030674 & GO:0030897			Coil (COILS);G3DSA:3.30.40.10 (GENE3D);G3DSA:2.130.10.10 (GENE3D);PF12451 (PFAM);PF17122 (PFAM);PF00637 (PFAM);G3DSA:1.25.40.10 (GENE3D);PTHR23323 (PANTHER);PTHR23323:SF24 (PANTHER);PS50089 (PROSITE_PROFILES);PS50236 (PROSITE_PROFILES);SSF57850 (SUPERFAMILY);SSF48371 (SUPERFAMILY);SSF50978 (SUPERFAMILY)	GO:0005515;GO:0005515/GO:0008270;GO:0016192/GO:0006886;GO:0005515;GO:0005515/GO:0008270;GO:0016192/GO:0006886;GO:0005488;GO:0005515	protein binding;protein binding/zinc ion binding;vesicle-mediated transport/intracellular protein transport;protein binding;protein binding/zinc ion binding;vesicle-mediated transport/intracellular protein transport;binding;protein binding	Molecular Function;Molecular Function/Molecular Function;Biological Process/Biological Process;Molecular Function;Molecular Function/Molecular Function;Biological Process/Biological Process;Molecular Function;Molecular Function	MS-DArT_site_3434	0
Eucgr.A01054	Chr01	30759168	30760326	+	RNA polymerase beta partial (chloroplast)	GO:0003677 & GO:0009507 & GO:0003899 & GO:0006351	2.7.7.6	DNA-directed RNA polymerase					MS-DArT_site_3443	0
Eucgr.A01094	Chr01	31166642	31170260	+	K18045 - tyrosine-protein phosphatase SIW14 [EC:3.1.3.48] (SIW14, OCA3) (1 of 3) & probable tyrosine- phosphatase At1g05000	GO:0004725 & GO:0035335	3.1.3.48 & 3.1.3.16 & 3.1 & 3.1.3.41	Protein-tyrosine-phosphatase. & Protein-serine/threonine phosphatase & Acting on ester bonds & Protein-tyrosine-phosphatase & 4-nitrophenylphosphatase	PR01911 (PRINTS);G3DSA:3.90.190.10 (GENE3D);PF03162 (PFAM);PTHR31126 (PANTHER);PTHR31126:SF15 (PANTHER);PS00383 (PROSITE_PATTERNS);SSF52799 (SUPERFAMILY)	GO:0004725;GO:0016791/GO:0016311/GO:0004725	protein tyrosine phosphatase activity;phosphatase activity/dephosphorylation/protein tyrosine phosphatase activity	Molecular Function;Molecular Function/Biological Process/Molecular Function	MS-DArT_site_3504	0
Eucgr.A01101	Chr01	31203903	31206703	-	Coiled-coil domain-containing isoform partial	GO:0016020			PTHR36704 (PANTHER)				MS-DArT_site_3516	0
Eucgr.A01107	Chr01	31277448	31281836	+	K06676 - condensin complex subunit 2 (BRRN1, BRN1, CAPH) (1 of 1) & condensin complex subunit 2	GO:0007076, GO:0000796 & GO:0007076 & GO:0000796			PF05786 (PFAM);PTHR13108 (PANTHER)	GO:0000796/GO:0007076	condensin complex/mitotic chromosome condensation	Cellular Component/Biological Process	MS-DArT_site_3553	0
Eucgr.A01121	Chr01	31445543	31446935	+	PTHR22939:SF79 - PEPTIDASE M50 FAMILY PROTEIN (1 of 1) & membrane metalloprotease chloroplastic	GO:0005515, GO:0006508, GO:0004222 & GO:0006508 & GO:0016021 & GO:0004222	3.4.24.85 & 3.4.24	S2P endopeptidase. & Acting on peptide bonds (peptidases)	SM00228 (SMART);PF02163 (PFAM);G3DSA:2.30.42.10 (GENE3D);PF13180 (PFAM);PTHR22939:SF79 (PANTHER);PTHR22939 (PANTHER);CYTOPLASMIC_DOMAIN (PHOBIUS);TRANSMEMBRANE (PHOBIUS);TRANSMEMBRANE (PHOBIUS);CYTOPLASMIC_DOMAIN (PHOBIUS);NON_CYTOPLASMIC_DOMAIN (PHOBIUS);PS50106 (PROSITE_PROFILES);SSF50156 (SUPERFAMILY);TMhelix (TMHMM);TMhelix (TMHMM)	GO:0005515;GO:0006508/GO:0004222;GO:0005515;GO:0005515;GO:0005515;GO:0005515	protein binding;proteolysis/metalloendopeptidase activity;protein binding;protein binding;protein binding;protein binding	Molecular Function;Biological Process/Molecular Function;Molecular Function;Molecular Function;Molecular Function;Molecular Function	MS-DArT_site_3576	0
Eucgr.A01129	Chr01	31548421	31557569	+	K01681 - aconitate hydratase (ACO, acnA) (1 of 3) & aconitate cytoplasmic	GO:0008152 & GO:0009570 & GO:0005524 & GO:0006979 & GO:0005507 & GO:0005618 & GO:0005739 & GO:0006101 & GO:0006102 & GO:0051539 & GO:0005774 & GO:0003994	4.2.1.3	Aconitate hydratase. & Aconitate hydratase	PR00415 (PRINTS);TIGR01341 (TIGRFAM);G3DSA:3.30.499.10 (GENE3D);G3DSA:3.30.499.10 (GENE3D);G3DSA:3.20.19.10 (GENE3D);PF00694 (PFAM);PF00330 (PFAM);G3DSA:3.40.1060.10 (GENE3D);PTHR11670:SF37 (PANTHER);PTHR11670:SF37 (PANTHER);PTHR11670 (PANTHER);PS00450 (PROSITE_PATTERNS);PS01244 (PROSITE_PATTERNS);SSF52016 (SUPERFAMILY);SSF53732 (SUPERFAMILY)	GO:0008152;GO:0008152;GO:0008152;GO:0008152;GO:0008152;GO:0008152;GO:0008152;GO:0008152	metabolic process;metabolic process;metabolic process;metabolic process;metabolic process;metabolic process;metabolic process;metabolic process	Biological Process;Biological Process;Biological Process;Biological Process;Biological Process;Biological Process;Biological Process;Biological Process	MS-DArT_site_3596	0
Eucgr.A01743	Chr01	32334300	32336284	+	PF00646//PF08387 - F-box domain (F-box) // FBD (FBD) (1 of 11) & F-box FBD LRR-repeat At4g03220	GO:0005515			SM00256 (SMART);SM00579 (SMART);G3DSA:3.80.10.10 (GENE3D);PF00646 (PFAM);PF08387 (PFAM);PTHR32212:SF56 (PANTHER);PTHR32212 (PANTHER);PS50181 (PROSITE_PROFILES);SSF52047 (SUPERFAMILY);SSF81383 (SUPERFAMILY)	GO:0005515;GO:0005515;GO:0005515;GO:0005515	protein binding;protein binding;protein binding;protein binding	Molecular Function;Molecular Function;Molecular Function;Molecular Function	MS-DArT_site_3686	0
Eucgr.A01754	Chr01	32456771	32467945	+	K15341 - DNA cross-link repair 1B protein [EC:3.1.-.-] (DCLRE1B, SNM1B) (1 of 1) & 5 exonuclease Apollo	GO:0031848 & GO:0036297 & GO:0035312 & GO:0006303 & GO:0003684 & GO:0000784	3.1 & 3.1.11 & 3.1.15	Acting on ester bonds	PF07522 (PFAM);G3DSA:3.60.15.10 (GENE3D);PTHR23240 (PANTHER);PTHR23240:SF9 (PANTHER);SSF56281 (SUPERFAMILY)				MS-DArT_site_3720	0
Eucgr.A01755	Chr01	32459655	32462150	+	PF00069//PF00954//PF01453//PF08276 - Protein kinase domain (Pkinase) // S-locus glycoprotein domain (S_locus_glycop) // D-mannose binding lectin (B_lectin) // PAN-like domain (PAN_2) (1 of 32) & G-type lectin S-receptor-like serine threonine- kinase At2g19130	GO:0048544, GO:0006468, GO:0005524, GO:0004672 & GO:0005524 & GO:0048544 & GO:0016021 & GO:0004674 & GO:0006468	2.7.11.1 & 2.7.11	Non-specific serine/threonine protein kinase. & Transferring phosphorus-containing groups	SM00220 (SMART);SM00473 (SMART);PIRSF000641 (PIRSF);SM00108 (SMART);PF08276 (PFAM);PF01453 (PFAM);PF00954 (PFAM);PF00069 (PFAM);G3DSA:2.60.120.200 (GENE3D);G3DSA:2.90.10.10 (GENE3D);G3DSA:1.10.510.10 (GENE3D);G3DSA:3.30.200.20 (GENE3D);PTHR27002 (PANTHER);PTHR27002:SF150 (PANTHER);PS00107 (PROSITE_PATTERNS);PS00108 (PROSITE_PATTERNS);SIGNAL_PEPTIDE_C_REGION (PHOBIUS);CYTOPLASMIC_DOMAIN (PHOBIUS);…	GO:0006468/GO:0004672/GO:0005524;GO:0004674;GO:0048544;GO:0006468/GO:0004672/GO:0005524;GO:0005524;GO:0006468/GO:0004672;GO:0006468/GO:0004672/GO:0005524	protein phosphorylation/protein kinase activity/ATP binding;protein serine/threonine kinase activity;recognition of pollen;protein phosphorylation/protein kinase activity/ATP binding;ATP binding;protein phosphorylation/protein kinase activity;protein phosphorylation/protein kinase activity/ATP binding	Biological Process/Molecular Function/Molecular Function;Molecular Function;Biological Process;Biological Process/Molecular Function/Molecular Function;Molecular Function;Biological Process/Molecular Function;Biological Process/Molecular Function/Molecular Function	MS-DArT_site_3720	0
Eucgr.A01807	Chr01	33080167	33083598	-	PTHR19282:SF158 - TETRASPANIN-19 (1 of 1) & tetraspanin-19	GO:0016021			PF00335 (PFAM);PTHR19282 (PANTHER);PTHR19282:SF158 (PANTHER);CYTOPLASMIC_DOMAIN (PHOBIUS);CYTOPLASMIC_DOMAIN (PHOBIUS);TRANSMEMBRANE (PHOBIUS);NON_CYTOPLASMIC_DOMAIN (PHOBIUS);TRANSMEMBRANE (PHOBIUS);TRANSMEMBRANE (PHOBIUS);CYTOPLASMIC_DOMAIN (PHOBIUS);TRANSMEMBRANE (PHOBIUS);NON_CYTOPLASMIC_DOMAIN (PHOBIUS);TRANSMEMBRANE (PHOBIUS);NON_CYTOPLASMIC_DOMAIN (PHOBIUS);TMhelix (TMHMM);TMhelix (TMHMM);…	GO:0016021	integral component of membrane	Cellular Component	MS-DArT_site_3840	0
Eucgr.A01808	Chr01	33080440	33081196	+	hypothetical protein EUGRSUZ_A01808								MS-DArT_site_3840	0
Eucgr.A01811	Chr01	33094542	33097552	+	Acyl-[acyl-carrier- ]--UDP-N-acetylglucosamine O-acyltransferase	GO:0016740			PTHR35497 (PANTHER)				MS-DArT_site_3844	0
Eucgr.A01814	Chr01	33124611	33127928	+	PTHR21392:SF4 - DTW DOMAIN-CONTAINING PROTEIN (1 of 1) & DTW domain-containing isoform 1				SM01144 (SMART);PF03942 (PFAM);PTHR21392 (PANTHER);PTHR21392:SF4 (PANTHER);PS51257 (PROSITE_PROFILES)				MS-DArT_site_3851	0
Eucgr.A01820	Chr01	33175023	33178230	-	PTHR31805:SF3 - PROLINE-RICH PROTEIN-RELATED (1 of 2) & bromodomain-containing 4				Coil (COILS);PF07223 (PFAM);G3DSA:1.10.8.10 (GENE3D);PTHR31805 (PANTHER);PTHR31805:SF3 (PANTHER)				MS-DArT_site_3863,MS-DArT_site_3864|MS-DArT_site_3865	0,0
Eucgr.A01823	Chr01	33196272	33200552	-	PTHR31451:SF1 - MANNAN ENDO-1,4-BETA-MANNOSIDASE 2-RELATED (1 of 2) & mannan endo-1,4-beta-mannosidase 2-like	GO:0005975, GO:0004553 & GO:0046355 & GO:0016021 & GO:0016985	3.2.1.78 & 3.2.1.25 & 3.2.1	Mannan endo-1,4-beta-mannosidase. & Beta-mannosidase & Mannan endo-1,4-beta-mannosidase & Glycosylases	PF00150 (PFAM);G3DSA:3.20.20.80 (GENE3D);PTHR31451 (PANTHER);PTHR31451:SF1 (PANTHER);CYTOPLASMIC_DOMAIN (PHOBIUS);TRANSMEMBRANE (PHOBIUS);NON_CYTOPLASMIC_DOMAIN (PHOBIUS);PS51257 (PROSITE_PROFILES);SSF51445 (SUPERFAMILY);TMhelix (TMHMM)	GO:0004553/GO:0005975;GO:0005975	hydrolase activity, hydrolyzing O-glycosyl compounds/carbohydrate metabolic process;carbohydrate metabolic process	Molecular Function/Biological Process;Biological Process	MS-DArT_site_3875|MS-DArT_site_3876	0
Eucgr.A01888	Chr01	34024649	34028156	-	hypothetical protein EUGRSUZ_A01888				Coil (COILS);Coil (COILS);Coil (COILS);Coil (COILS);Coil (COILS);PTHR35120:SF2 (PANTHER);PTHR35120 (PANTHER)				MS-DArT_site_4020,MS-DArT_site_4022	0,0
Eucgr.A01905	Chr01	34267173	34270599	-	PTHR12847:SF4 - ADAPTIN EAR-BINDING COAT-ASSOCIATED PROTEIN 1 NECAP-1 (1 of 1) & NECAP CG9132	GO:0016020, GO:0006897 & GO:0016020 & GO:0006897			PF07933 (PFAM);G3DSA:2.30.29.30 (GENE3D);PTHR12847 (PANTHER);PTHR12847:SF4 (PANTHER);SSF50729 (SUPERFAMILY)	GO:0016020/GO:0006897	membrane/endocytosis	Cellular Component/Biological Process	MS-DArT_site_4065	0
Eucgr.A01915	Chr01	34452858	34459891	-	4.1.1.31 - Phosphoenolpyruvate carboxylase / Phosphoenolpyruvic carboxylase (1 of 3), & phosphoenolpyruvate carboxylase 2	GO:0015977, GO:0008964, GO:0006099 & GO:0032440 & GO:0006099 & GO:0015977 & GO:0008964	4.1.1.31 & 4.1.1 & 1.3.1.74	Phosphoenolpyruvate carboxylase. & Carbon-carbon lyases & 2-alkenal reductase (NAD(P)(+)) & Phosphoenolpyruvate carboxylase	PR00150 (PRINTS);PF00311 (PFAM);G3DSA:1.20.1440.90 (GENE3D);PTHR30523 (PANTHER);PTHR30523:SF8 (PANTHER);PS00393 (PROSITE_PATTERNS);PS00781 (PROSITE_PATTERNS);MF_00595 (HAMAP);SSF51621 (SUPERFAMILY)	GO:0015977/GO:0006099/GO:0008964;GO:0015977/GO:0006099/GO:0008964;GO:0015977/GO:0006099/GO:0008964;GO:0003824	carbon fixation/tricarboxylic acid cycle/phosphoenolpyruvate carboxylase activity;carbon fixation/tricarboxylic acid cycle/phosphoenolpyruvate carboxylase activity;carbon fixation/tricarboxylic acid cycle/phosphoenolpyruvate carboxylase activity;catalytic activity	Biological Process/Biological Process/Molecular Function;Biological Process/Biological Process/Molecular Function;Biological Process/Biological Process/Molecular Function;Molecular Function	MS-DArT_site_4087|MS-DArT_site_4088	0
Eucgr.A01926	Chr01	34572941	34578938	+	PTHR24057:SF12 - SHAGGY-RELATED PROTEIN KINASE IOTA-RELATED (1 of 1) & shaggy-related kinase eta isoform X1	GO:0006468, GO:0004672 & GO:0005524 & GO:0004674 & GO:0006468	2.7.11.1, 2.7.11.26 & 2.7.11	Non-specific serine/threonine protein kinase., [Tau protein] kinase. & Transferring phosphorus-containing groups	SM00220 (SMART);G3DSA:3.30.200.20 (GENE3D);G3DSA:1.10.510.10 (GENE3D);PF00069 (PFAM);PTHR24057:SF12 (PANTHER);PTHR24057 (PANTHER);PS00108 (PROSITE_PATTERNS);PS00107 (PROSITE_PATTERNS);PS50011 (PROSITE_PROFILES);SSF56112 (SUPERFAMILY)	GO:0006468/GO:0005524/GO:0004672;GO:0006468/GO:0005524/GO:0004672;GO:0006468/GO:0004672;GO:0005524;GO:0006468/GO:0005524/GO:0004672	protein phosphorylation/ATP binding/protein kinase activity;protein phosphorylation/ATP binding/protein kinase activity;protein phosphorylation/protein kinase activity;ATP binding;protein phosphorylation/ATP binding/protein kinase activity	Biological Process/Molecular Function/Molecular Function;Biological Process/Molecular Function/Molecular Function;Biological Process/Molecular Function;Molecular Function;Biological Process/Molecular Function/Molecular Function	MS-DArT_site_4104	0
Eucgr.A01931	Chr01	34625688	34629160	+	PTHR10788:SF18 - ALPHA,ALPHA-TREHALOSE-PHOSPHATE SYNTHASE [UDP-FORMING] 7-RELATED (1 of 2) & probable alpha,alpha-trehalose-phosphate synthase [UDP-forming] 7	GO:0005992, GO:0003824 & GO:0003825 & GO:0004805 & GO:0016021 & GO:0005829 & GO:0005992 & GO:0016311	2.4.1.15, 3.1.3.12 & 2.4.1.15 & 3.1 & 3.1.3.12 & 3.1.3.41 & 2.4.1	Alpha,alpha-trehalose-phosphate synthase (UDP-forming)., Trehalose-phosphatase. & Alpha,alpha-trehalose-phosphate synthase (UDP-forming) & Acting on ester bonds & Trehalose-phosphatase & 4-nitrophenylphosphatase & Glycosyltransferases	Coil (COILS);G3DSA:3.40.50.2000 (GENE3D);TIGR01484 (TIGRFAM);G3DSA:3.40.50.1000 (GENE3D);TIGR00685 (TIGRFAM);PF00982 (PFAM);G3DSA:3.40.50.2000 (GENE3D);PF02358 (PFAM);PTHR10788:SF18 (PANTHER);PTHR10788 (PANTHER);SSF53756 (SUPERFAMILY);SSF56784 (SUPERFAMILY)	GO:0003824/GO:0005992;GO:0003824/GO:0005992;GO:0003824/GO:0005992	catalytic activity/trehalose biosynthetic process;catalytic activity/trehalose biosynthetic process;catalytic activity/trehalose biosynthetic process	Molecular Function/Biological Process;Molecular Function/Biological Process;Molecular Function/Biological Process	MS-DArT_site_4108	0
Eucgr.A02000	Chr01	35422074	35422585	-	coiled-coil domain-containing 94 homolog								MS-DArT_site_4251	0
Eucgr.A02014	Chr01	35595581	35597620	-	PTHR31479:SF3 - GB (1 of 2) & GDSL esterase lipase At4g10955-like	GO:0006629 & GO:0016787			G3DSA:3.40.50.1820 (GENE3D);PF01764 (PFAM);PTHR31479:SF3 (PANTHER);PTHR31479 (PANTHER);SSF53474 (SUPERFAMILY)	GO:0006629	lipid metabolic process	Biological Process	MS-DArT_site_4280|MS-DArT_site_4281,MS-DArT_site_4282	0,0
Eucgr.A02017	Chr01	35607477	35617519	+	PTHR12811 - VACUOLAR PROTEIN SORTING VPS16 (1 of 1) & VACUOLELESS1	GO:0006886, GO:0005737, GO:0007033 & GO:0009705 & GO:0032889 & GO:0005768 & GO:0035542 & GO:0003779 & GO:0045992 & GO:0016197 & GO:0006886 & GO:0005765 & GO:0030897 & GO:0051469			PIRSF007949 (PIRSF);PF04840 (PFAM);G3DSA:2.130.10.10 (GENE3D);PF04841 (PFAM);PTHR12811:SF0 (PANTHER);PTHR12811 (PANTHER);SSF50978 (SUPERFAMILY)	GO:0007033/GO:0006886;GO:0005737/GO:0006886;GO:0005515;GO:0005737/GO:0006886;GO:0007033/GO:0006886;GO:0005515	vacuole organization/intracellular protein transport;cytoplasm/intracellular protein transport;protein binding;cytoplasm/intracellular protein transport;vacuole organization/intracellular protein transport;protein binding	Biological Process/Biological Process;Cellular Component/Biological Process;Molecular Function;Cellular Component/Biological Process;Biological Process/Biological Process;Molecular Function	MS-DArT_site_4284	0
Eucgr.A02032	Chr01	35747192	35750528	-	PTHR13439//PTHR13439:SF18 - CT120 PROTEIN // SUBFAMILY NOT NAMED (1 of 1) & transmembrane 56	GO:0016021			SM00724 (SMART);PF03798 (PFAM);PTHR13439 (PANTHER);PTHR13439:SF18 (PANTHER);NON_CYTOPLASMIC_DOMAIN (PHOBIUS);TRANSMEMBRANE (PHOBIUS);CYTOPLASMIC_DOMAIN (PHOBIUS);CYTOPLASMIC_DOMAIN (PHOBIUS);TRANSMEMBRANE (PHOBIUS);TRANSMEMBRANE (PHOBIUS);CYTOPLASMIC_DOMAIN (PHOBIUS);TRANSMEMBRANE (PHOBIUS);TRANSMEMBRANE (PHOBIUS);NON_CYTOPLASMIC_DOMAIN (PHOBIUS);CYTOPLASMIC_DOMAIN (PHOBIUS);TRANSMEMBRANE (PHOBIU…	GO:0016021;GO:0016021;GO:0016021	integral component of membrane;integral component of membrane;integral component of membrane	Cellular Component;Cellular Component;Cellular Component	MS-DArT_site_4309	0
Eucgr.A02072	Chr01	36198171	36200985	+	extensin isoform X1				PTHR31257:SF2 (PANTHER);PTHR31257 (PANTHER)				MS-DArT_site_4372|MS-DArT_site_4373	0
Eucgr.A02078	Chr01	36257091	36263001	+	PTHR31150:SF9 - PROTEIN BINDING / ZINC ION BINDING PROTEIN (1 of 1), & RING U-box superfamily	GO:0008270			SM00184 (SMART);G3DSA:3.30.40.10 (GENE3D);PTHR31150:SF9 (PANTHER);PTHR31150 (PANTHER);NON_CYTOPLASMIC_DOMAIN (PHOBIUS);CYTOPLASMIC_DOMAIN (PHOBIUS);TRANSMEMBRANE (PHOBIUS);PS50089 (PROSITE_PROFILES);SSF57850 (SUPERFAMILY);TMhelix (TMHMM)	GO:0008270/GO:0005515;GO:0008270/GO:0005515	zinc ion binding/protein binding;zinc ion binding/protein binding	Molecular Function/Molecular Function;Molecular Function/Molecular Function	MS-DArT_site_4387|MS-DArT_site_4388	0
Eucgr.A02083	Chr01	36284058	36296035	+	K12580 - CCR4-NOT transcription complex subunit 3 (CNOT3, NOT3) (1 of 1), & general negative regulator of transcription subunit 3 isoform X1	GO:0006355, GO:0005634 & GO:0005634 & GO:0000932 & GO:0006355 & GO:0030015 & GO:0017148 & GO:0000288			Coil (COILS);Coil (COILS);PIRSF005290 (PIRSF);PF04153 (PFAM);PF04065 (PFAM);PTHR23326 (PANTHER);PTHR23326 (PANTHER);PTHR23326:SF1 (PANTHER);PTHR23326:SF1 (PANTHER)	GO:0006355/GO:0005634;GO:0005634/GO:0006355;GO:0006355/GO:0005634	regulation of transcription, DNA-templated/nucleus;nucleus/regulation of transcription, DNA-templated;regulation of transcription, DNA-templated/nucleus	Biological Process/Cellular Component;Cellular Component/Biological Process;Biological Process/Cellular Component	MS-DArT_site_4394,MS-DArT_site_4393	0,0
Eucgr.A02087	Chr01	36319659	36323581	-	PF01844 - HNH endonuclease (HNH) (1 of 4) & HNH endonuclease	GO:0004519, GO:0003676 & GO:0090305 & GO:0004519	3.1	Acting on ester bonds	SM00507 (SMART);PF14279 (PFAM);PTHR33877:SF2 (PANTHER);PTHR33877 (PANTHER)				MS-DArT_site_4397,MS-DArT_site_4396	0,0
Eucgr.A02095	Chr01	36359002	36364470	-	K09500 - T-complex protein 1 subunit theta (CCT8) (1 of 1) & T-complex 1 subunit theta	GO:0005524 & GO:0005737 & GO:0051082 & GO:0006457			Coil (COILS);PR00304 (PRINTS);G3DSA:1.10.560.10 (GENE3D);PF00118 (PFAM);G3DSA:3.30.260.10 (GENE3D);TIGR02346 (TIGRFAM);PTHR11353 (PANTHER);PTHR11353:SF19 (PANTHER);PS00750 (PROSITE_PATTERNS);SSF48592 (SUPERFAMILY);SSF54849 (SUPERFAMILY);SSF52029 (SUPERFAMILY)	GO:0005524;GO:0051082/GO:0006457/GO:0005524;GO:0051082/GO:0006457/GO:0005524	ATP binding;unfolded protein binding/protein folding/ATP binding;unfolded protein binding/protein folding/ATP binding	Molecular Function;Molecular Function/Biological Process/Molecular Function;Molecular Function/Biological Process/Molecular Function	MS-DArT_site_4403	0
Eucgr.A02119	Chr01	36589039	36596954	-	PTHR22870:SF175 - ANKYRIN REPEAT AND REGULATOR OF CHROMOSOME CONDENSATION (RCC1) DOMAIN-CONTAINING PROTEIN (1 of 1) & ankyrin repeat family	GO:0016310 & GO:0016301			Coil (COILS);PR00633 (PRINTS);SM00248 (SMART);G3DSA:1.25.40.20 (GENE3D);G3DSA:2.130.10.30 (GENE3D);G3DSA:2.130.10.30 (GENE3D);PF00415 (PFAM);PF12796 (PFAM);PTHR22870 (PANTHER);PTHR22870:SF175 (PANTHER);PS50088 (PROSITE_PROFILES);PS50012 (PROSITE_PROFILES);PS50012 (PROSITE_PROFILES);PS50088 (PROSITE_PROFILES);PS50297 (PROSITE_PROFILES);PS50012 (PROSITE_PROFILES);PS50012 (PROSITE_PROFILES);PS50012 …	GO:0005515;GO:0005515;GO:0005515	protein binding;protein binding;protein binding	Molecular Function;Molecular Function;Molecular Function	MS-DArT_site_4456|MS-DArT_site_4457,MS-DArT_site_4455	0,0
Eucgr.A02133	Chr01	36693516	36695479	-	K11433 - histone-lysine N-methyltransferase SETMAR (SETMAR) (1 of 1) & histone-lysine N-methyltransferase SUVR3	GO:0005515 & GO:0005634 & GO:0034968 & GO:0018024	2.1.1.43 & 2.1.1	Histone-lysine N-methyltransferase. & Histone-lysine N-methyltransferase & Transferring one-carbon groups	SM00317 (SMART);G3DSA:2.170.270.10 (GENE3D);PF00856 (PFAM);PTHR22884 (PANTHER);PTHR22884:SF332 (PANTHER);PS50868 (PROSITE_PROFILES);PS50280 (PROSITE_PROFILES);SSF82199 (SUPERFAMILY)	GO:0005515;GO:0005515;GO:0005515	protein binding;protein binding;protein binding	Molecular Function;Molecular Function;Molecular Function	MS-DArT_site_4483	0
Eucgr.A02134	Chr01	36697583	36704293	+	PTHR31587:SF3 - F1K23.6 (1 of 1), & Transmembrane 194A	GO:0016021			PF10225 (PFAM);PTHR31587 (PANTHER);PTHR31587:SF3 (PANTHER);NON_CYTOPLASMIC_DOMAIN (PHOBIUS);TRANSMEMBRANE (PHOBIUS);NON_CYTOPLASMIC_DOMAIN (PHOBIUS);NON_CYTOPLASMIC_DOMAIN (PHOBIUS);TRANSMEMBRANE (PHOBIUS);TRANSMEMBRANE (PHOBIUS);NON_CYTOPLASMIC_DOMAIN (PHOBIUS);TRANSMEMBRANE (PHOBIUS);TRANSMEMBRANE (PHOBIUS);CYTOPLASMIC_DOMAIN (PHOBIUS);CYTOPLASMIC_DOMAIN (PHOBIUS);CYTOPLASMIC_DOMAIN (PHOBIUS);T…				MS-DArT_site_4487,MS-DArT_site_4488,MS-DArT_site_4486	0,0,0
Eucgr.A02139	Chr01	36744330	36748303	+	K14846 - ribosome production factor 1 (RPF1) (1 of 1) & ribosome production factor 1-like	GO:0000460 & GO:0000470 & GO:0009793 & GO:0005829 & GO:0042134 & GO:0005730 & GO:0000027 & GO:0030687			PTHR37726:SF1 (PANTHER);PTHR37726 (PANTHER);NON_CYTOPLASMIC_DOMAIN (PHOBIUS);CYTOPLASMIC_DOMAIN (PHOBIUS);TRANSMEMBRANE (PHOBIUS);CYTOPLASMIC_DOMAIN (PHOBIUS);CYTOPLASMIC_DOMAIN (PHOBIUS);NON_CYTOPLASMIC_DOMAIN (PHOBIUS);TRANSMEMBRANE (PHOBIUS);TRANSMEMBRANE (PHOBIUS);CYTOPLASMIC_DOMAIN (PHOBIUS);TRANSMEMBRANE (PHOBIUS);TRANSMEMBRANE (PHOBIUS);TRANSMEMBRANE (PHOBIUS);TRANSMEMBRANE (PHOBIUS);NON_C…				MS-DArT_site_4489	0
Eucgr.A02143	Chr01	36777819	36781496	+	PTHR19297:SF93 - CORE-2/I-BRANCHING BETA-1,6-N-ACETYLGLUCOSAMINYLTRANSFERASE FAMILY PROTEIN (1 of 1) & beta-glucuronosyltransferase 14A	GO:0016020, GO:0008375 & GO:0008375 & GO:0016021 & GO:0009567 & GO:0048868	2.4.1	Glycosyltransferases	PF02485 (PFAM);PTHR19297 (PANTHER);PTHR19297:SF93 (PANTHER);NON_CYTOPLASMIC_DOMAIN (PHOBIUS);TRANSMEMBRANE (PHOBIUS);CYTOPLASMIC_DOMAIN (PHOBIUS);TMhelix (TMHMM)	GO:0008375/GO:0016020	acetylglucosaminyltransferase activity/membrane	Molecular Function/Cellular Component	MS-DArT_site_4497	0
Eucgr.A02162	Chr01	36984879	36995756	-	K15559 - regulator of Ty1 transposition protein 103 (RTT103) (1 of 3) & regulation of nuclear pre-mRNA domain-containing 1B-like				Coil (COILS);SM00582 (SMART);PF04818 (PFAM);G3DSA:1.25.40.90 (GENE3D);PTHR12460 (PANTHER);PS51391 (PROSITE_PROFILES);SSF48464 (SUPERFAMILY)				MS-DArT_site_4534	0
Eucgr.A02166	Chr01	37014553	37017222	-	PTHR24078 - DNAJ HOMOLOG SUBFAMILY C MEMBER (1 of 100) & chaperone dnaJ 72	GO:0016021			PR00625 (PRINTS);SM00271 (SMART);PF00226 (PFAM);G3DSA:1.10.287.110 (GENE3D);PTHR24078 (PANTHER);PS00636 (PROSITE_PATTERNS);NON_CYTOPLASMIC_DOMAIN (PHOBIUS);TRANSMEMBRANE (PHOBIUS);CYTOPLASMIC_DOMAIN (PHOBIUS);PS50076 (PROSITE_PROFILES);SSF46565 (SUPERFAMILY);TMhelix (TMHMM);TMhelix (TMHMM)				MS-DArT_site_4538	0
Eucgr.A02176	Chr01	37070100	37073626	+	PTHR19139:SF128 - AQUAPORIN SIP2-1-RELATED (1 of 1), & probable aquaporin SIP2-1	GO:0016020, GO:0006810, GO:0005215 & GO:0005887 & GO:0006833 & GO:0015254 & GO:0009992 & GO:0015793 & GO:0034220 & GO:0015250			PR00783 (PRINTS);G3DSA:1.20.1080.10 (GENE3D);PTHR19139 (PANTHER);PTHR19139:SF128 (PANTHER);TRANSMEMBRANE (PHOBIUS);TRANSMEMBRANE (PHOBIUS);TRANSMEMBRANE (PHOBIUS);TRANSMEMBRANE (PHOBIUS);TRANSMEMBRANE (PHOBIUS);TRANSMEMBRANE (PHOBIUS);CYTOPLASMIC_DOMAIN (PHOBIUS);NON_CYTOPLASMIC_DOMAIN (PHOBIUS);CYTOPLASMIC_DOMAIN (PHOBIUS);NON_CYTOPLASMIC_DOMAIN (PHOBIUS);NON_CYTOPLASMIC_DOMAIN (PHOBIUS);CYTOPLA…	GO:0006810/GO:0016020/GO:0005215;GO:0006810/GO:0016020/GO:0005215	transport/membrane/transporter activity;transport/membrane/transporter activity	Biological Process/Cellular Component/Molecular Function;Biological Process/Cellular Component/Molecular Function	MS-DArT_site_4561	0
Eucgr.A02178	Chr01	37089002	37097332	+	K01209 - alpha-N-arabinofuranosidase (E3.2.1.55, abfA) (1 of 2) & alpha-L-arabinofuranosidase 1	GO:0046556, GO:0046373 & GO:0046373 & GO:0046556	3.2.1.55	Non-reducing end alpha-L-arabinofuranosidase. & Non-reducing end alpha-L-arabinofuranosidase	SM00813 (SMART);G3DSA:2.60.120.260 (GENE3D);PF06964 (PFAM);PTHR31776 (PANTHER);PTHR31776:SF0 (PANTHER);SIGNAL_PEPTIDE_C_REGION (PHOBIUS);SIGNAL_PEPTIDE (PHOBIUS);SIGNAL_PEPTIDE_N_REGION (PHOBIUS);NON_CYTOPLASMIC_DOMAIN (PHOBIUS);SIGNAL_PEPTIDE_H_REGION (PHOBIUS);SignalP-noTM (SIGNALP_EUK);SSF51445 (SUPERFAMILY);TMhelix (TMHMM)	GO:0046556/GO:0046373;GO:0046556/GO:0046373	alpha-L-arabinofuranosidase activity/L-arabinose metabolic process;alpha-L-arabinofuranosidase activity/L-arabinose metabolic process	Molecular Function/Biological Process;Molecular Function/Biological Process	MS-DArT_site_4565	0
Eucgr.A02181	Chr01	37105608	37106979	-	K19034 - 50S ribosomal protein 5 (PSRP5) (1 of 2) & 50S ribosomal chloroplastic-like	GO:0009507			PTHR34678:SF1 (PANTHER);PTHR34678 (PANTHER);SIGNAL_PEPTIDE (PHOBIUS);SIGNAL_PEPTIDE_N_REGION (PHOBIUS);NON_CYTOPLASMIC_DOMAIN (PHOBIUS);SIGNAL_PEPTIDE_H_REGION (PHOBIUS);SIGNAL_PEPTIDE_C_REGION (PHOBIUS);PD031914 (PRODOM);SignalP-noTM (SIGNALP_GRAM_NEGATIVE);SignalP-TM (SIGNALP_GRAM_POSITIVE)				MS-DArT_site_4567	0
Eucgr.A02228	Chr01	37685037	37687624	-	1.1.1.100 - 3-oxoacyl-[acyl-carrier-protein] reductase (1 of 6) & 3-oxoacyl-[acyl-carrier- ] reductase -like	GO:0004316 & GO:0055114	1.1.1.100 & 2.3.1.85	3-oxoacyl-[acyl-carrier-protein] reductase. & Fatty-acid synthase & 3-oxoacyl-[acyl-carrier-protein] reductase	PR00081 (PRINTS);PR00080 (PRINTS);G3DSA:3.40.50.720 (GENE3D);PF00106 (PFAM);PTHR24322 (PANTHER);PTHR24322:SF364 (PANTHER);PTHR24322:SF364 (PANTHER);PS00061 (PROSITE_PATTERNS);SSF51735 (SUPERFAMILY)	GO:0016491	oxidoreductase activity	Molecular Function	MS-DArT_site_4670	0
Eucgr.A02236	Chr01	37759858	37770596	-	K02470 - DNA gyrase subunit B [EC:5.99.1.3] (gyrB) (1 of 1) & DNA gyrase subunit chloroplastic mitochondrial	GO:0006265, GO:0005524, GO:0003918, GO:0003677 & GO:0009295 & GO:0003677 & GO:0005524 & GO:0009507 & GO:0046872 & GO:0009330 & GO:0005739 & GO:0007059 & GO:0005694 & GO:0003918 & GO:0006265 & GO:0006268	5.99.1.3 & 3.6.1 & 3.6.1.3 & 5.99.1 & 3.6.1.15	DNA topoisomerase (ATP-hydrolyzing). & Acting on acid anhydrides & Adenosinetriphosphatase & Other isomerases & DNA topoisomerase (ATP-hydrolyzing) & Nucleoside-triphosphate phosphatase	PR00418 (PRINTS);PR01159 (PRINTS);SM00387 (SMART);SM00433 (SMART);PF00986 (PFAM);G3DSA:3.30.565.10 (GENE3D);G3DSA:3.40.50.670 (GENE3D);PF00204 (PFAM);PF02518 (PFAM);G3DSA:3.30.230.10 (GENE3D);TIGR01059 (TIGRFAM);PF01751 (PFAM);PTHR10169 (PANTHER);PTHR10169:SF35 (PANTHER);PS00177 (PROSITE_PATTERNS);SIGNAL_PEPTIDE_H_REGION (PHOBIUS);SIGNAL_PEPTIDE (PHOBIUS);SIGNAL_PEPTIDE_N_REGION (PHOBIUS);SIGNAL_…	GO:0006265/GO:0005524/GO:0003918/GO:0003677;GO:0006265/GO:0003677/GO:0005524/GO:0003918;GO:0006265/GO:0005524/GO:0003918/GO:0003677;GO:0006265/GO:0003918/GO:0005524/GO:0003677;GO:0003677/GO:0005524/GO:0003918/GO:0006265;GO:0003677/GO:0005524/GO:0006265/GO:0003918;GO:0005694/GO:0003677/GO:0006265/GO:0003918/GO:0005524;GO:0006265/GO:0003918/GO:0003677/GO:0005524;GO:0003918/GO:0005524	DNA topological change/ATP binding/DNA topoisomerase type II (ATP-hydrolyzing) activity/DNA binding;DNA topological change/DNA binding/ATP binding/DNA topoisomerase type II (ATP-hydrolyzing) activity;DNA topological change/ATP binding/DNA topoisomerase type II (ATP-hydrolyzing) activity/DNA binding;DNA topological change/DNA topoisomerase type II (ATP-hydrolyzing) activity/ATP binding/DNA binding…	Biological Process/Molecular Function/Molecular Function/Molecular Function;Biological Process/Molecular Function/Molecular Function/Molecular Function;Biological Process/Molecular Function/Molecular Function/Molecular Function;Biological Process/Molecular Function/Molecular Function/Molecular Function;Molecular Function/Molecular Function/Molecular Function/Biological Process;Molecular Function/…	MS-DArT_site_4694	0
Eucgr.A02240	Chr01	37792498	37797778	-	K14431 - transcription factor TGA (TGA) (1 of 9) & transcription factor HBP-1b(c38)-like isoform X1	GO:0043565, GO:0006355, GO:0003700, GO:0006351 & GO:0003700 & GO:0006351 & GO:0006355 & GO:0043565			Coil (COILS);SM00338 (SMART);PF00170 (PFAM);PF14144 (PFAM);G3DSA:1.20.5.170 (GENE3D);PTHR22952:SF206 (PANTHER);PTHR22952 (PANTHER);PS00036 (PROSITE_PATTERNS);PS50217 (PROSITE_PROFILES);SSF57959 (SUPERFAMILY)	GO:0043565/GO:0006355/GO:0003700;GO:0043565/GO:0006355/GO:0003700;GO:0006351/GO:0043565;GO:0043565/GO:0006355/GO:0003700;GO:0043565/GO:0006355/GO:0003700	sequence-specific DNA binding/regulation of transcription, DNA-templated/transcription factor activity, sequence-specific DNA binding;sequence-specific DNA binding/regulation of transcription, DNA-templated/transcription factor activity, sequence-specific DNA binding;transcription, DNA-templated/sequence-specific DNA binding;sequence-specific DNA binding/regulation of transcription, DNA-templated…	Molecular Function/Biological Process/Molecular Function;Molecular Function/Biological Process/Molecular Function;Biological Process/Molecular Function;Molecular Function/Biological Process/Molecular Function;Molecular Function/Biological Process/Molecular Function	MS-DArT_site_4702|MS-DArT_site_4703	0
Eucgr.A02290	Chr01	38321034	38326352	-	K03860 - phosphatidylinositol glycan, class Q (PIGQ, GPI1) (1 of 1) & N-acetylglucosaminyl-phosphatidylinositol biosynthetic gpi1 isoform X1	GO:0017176, GO:0016021, GO:0006506 & GO:0006506 & GO:0000506 & GO:0016021 & GO:0017176	2.4.1.198 & 2.4.1	Phosphatidylinositol N-acetylglucosaminyltransferase. & Glycosyltransferases & Phosphatidylinositol N-acetylglucosaminyltransferase	PF05024 (PFAM);PTHR21329:SF3 (PANTHER);PTHR21329 (PANTHER);TRANSMEMBRANE (PHOBIUS);CYTOPLASMIC_DOMAIN (PHOBIUS);CYTOPLASMIC_DOMAIN (PHOBIUS);NON_CYTOPLASMIC_DOMAIN (PHOBIUS);NON_CYTOPLASMIC_DOMAIN (PHOBIUS);TRANSMEMBRANE (PHOBIUS);CYTOPLASMIC_DOMAIN (PHOBIUS);TRANSMEMBRANE (PHOBIUS);TRANSMEMBRANE (PHOBIUS);TRANSMEMBRANE (PHOBIUS);NON_CYTOPLASMIC_DOMAIN (PHOBIUS);TRANSMEMBRANE (PHOBIUS);NON_CYTOPL…	GO:0006506/GO:0016021/GO:0017176	GPI anchor biosynthetic process/integral component of membrane/phosphatidylinositol N-acetylglucosaminyltransferase activity	Biological Process/Cellular Component/Molecular Function	MS-DArT_site_4797|MS-DArT_site_4798	0
Eucgr.A02294	Chr01	38355982	38367792	+	6.3.2.17 - Tetrahydrofolate synthase / Tetrahydrofolylpolyglutamate synthase (1 of 2) & folylpolyglutamate synthase isoform X1	GO:0009058, GO:0005524, GO:0009396, GO:0004326 & GO:0004326 & GO:0005524 & GO:0046901	6.3.2.17	Tetrahydrofolate synthase. & Tetrahydrofolate synthase	G3DSA:3.90.190.20 (GENE3D);TIGR01499 (TIGRFAM);G3DSA:3.40.1190.10 (GENE3D);PF08245 (PFAM);PTHR11136:SF7 (PANTHER);PTHR11136 (PANTHER);PS01012 (PROSITE_PATTERNS);SSF53244 (SUPERFAMILY);SSF53623 (SUPERFAMILY)	GO:0016874/GO:0009058/GO:0005524;GO:0005524/GO:0004326/GO:0009396;GO:0005524/GO:0009058;GO:0005524/GO:0009058;GO:0005524/GO:0004326/GO:0009396;GO:0004326/GO:0009396/GO:0005524;GO:0016874/GO:0009058/GO:0005524;GO:0005524/GO:0009058	ligase activity/biosynthetic process/ATP binding;ATP binding/tetrahydrofolylpolyglutamate synthase activity/folic acid-containing compound biosynthetic process;ATP binding/biosynthetic process;ATP binding/biosynthetic process;ATP binding/tetrahydrofolylpolyglutamate synthase activity/folic acid-containing compound biosynthetic process;tetrahydrofolylpolyglutamate synthase activity/folic acid-cont…	Molecular Function/Biological Process/Molecular Function;Molecular Function/Molecular Function/Biological Process;Molecular Function/Biological Process;Molecular Function/Biological Process;Molecular Function/Molecular Function/Biological Process;Molecular Function/Biological Process/Molecular Function;Molecular Function/Biological Process/Molecular Function;Molecular Function/Biological Process	MS-DArT_site_4805,MS-DArT_site_4806	0,0
Eucgr.A02297	Chr01	38381117	38385528	-	K12662 - U4/U6 small nuclear ribonucleoprotein PRP4 (PRPF4, PRP4) (1 of 1) & U4 U6 small nuclear ribonucleo PRP4	GO:0005515 & GO:0030529 & GO:0019013			Coil (COILS);PR00320 (PRINTS);SM00500 (SMART);SM00320 (SMART);PF00400 (PFAM);G3DSA:2.130.10.10 (GENE3D);PF08799 (PFAM);PTHR19846 (PANTHER);PS00678 (PROSITE_PATTERNS);PS50294 (PROSITE_PROFILES);PS50082 (PROSITE_PROFILES);SSF158230 (SUPERFAMILY);SSF50978 (SUPERFAMILY)	GO:0005515;GO:0005515;GO:0005515;GO:0005515;GO:0005515;GO:0005515	protein binding;protein binding;protein binding;protein binding;protein binding;protein binding	Molecular Function;Molecular Function;Molecular Function;Molecular Function;Molecular Function;Molecular Function	MS-DArT_site_4812	0
Eucgr.A02303	Chr01	38477885	38483148	-	PTHR22942:SF41 - DNA REPAIR PROTEIN RECA HOMOLOG 2, MITOCHONDRIAL (1 of 1) & DNA repair recA homolog mitochondrial	GO:0009432, GO:0006281, GO:0005524, GO:0003697 & GO:0008094 & GO:0003690 & GO:0004520 & GO:0000400 & GO:0000730 & GO:0042148 & GO:0006312 & GO:0003697 & GO:0000002 & GO:0005524 & GO:0009408 & GO:0000150 & GO:0010212	3.6.1.8 & 3.6.1 & 3.6.1.3 & 3.1 & 3.6.1.15	ATP diphosphatase. & Acting on acid anhydrides & Adenosinetriphosphatase & Acting on ester bonds & Nucleoside-triphosphate phosphatase	PR00142 (PRINTS);SM00382 (SMART);PF00154 (PFAM);G3DSA:3.30.250.10 (GENE3D);TIGR02012 (TIGRFAM);G3DSA:3.40.50.300 (GENE3D);PTHR22942:SF41 (PANTHER);PTHR22942 (PANTHER);PS00321 (PROSITE_PATTERNS);SIGNAL_PEPTIDE (PHOBIUS);NON_CYTOPLASMIC_DOMAIN (PHOBIUS);SIGNAL_PEPTIDE_H_REGION (PHOBIUS);SIGNAL_PEPTIDE_N_REGION (PHOBIUS);SIGNAL_PEPTIDE_C_REGION (PHOBIUS);PS50163 (PROSITE_PROFILES);PS50162 (PROSITE_P…	GO:0006281/GO:0005524/GO:0003697;GO:0006281/GO:0005524/GO:0003697;GO:0006281/GO:0005524/GO:0003697;GO:0008094/GO:0006259/GO:0003677/GO:0005524;GO:0008094/GO:0003677/GO:0005524/GO:0006259;GO:0006281/GO:0005524/GO:0008094/GO:0003677	DNA repair/ATP binding/single-stranded DNA binding;DNA repair/ATP binding/single-stranded DNA binding;DNA repair/ATP binding/single-stranded DNA binding;DNA-dependent ATPase activity/DNA metabolic process/DNA binding/ATP binding;DNA-dependent ATPase activity/DNA binding/ATP binding/DNA metabolic process;DNA repair/ATP binding/DNA-dependent ATPase activity/DNA binding	Biological Process/Molecular Function/Molecular Function;Biological Process/Molecular Function/Molecular Function;Biological Process/Molecular Function/Molecular Function;Molecular Function/Biological Process/Molecular Function/Molecular Function;Molecular Function/Molecular Function/Molecular Function/Biological Process;Biological Process/Molecular Function/Molecular Function/Molecular Function	MS-DArT_site_4818	0
Eucgr.A02319	Chr01	38620554	38622120	+	PTHR21027 - TRNA-SPLICING ENDONUCLEASE SUBUNIT SEN54 (1 of 4) & tRNA-splicing endonuclease subunit Sen54	GO:0016070			PF12928 (PFAM);PTHR21027 (PANTHER)				MS-DArT_site_4850	0
Eucgr.A02322	Chr01	38650444	38654507	+	K15326 - tRNA-splicing endonuclease subunit Sen54 (TSEN54) (1 of 2), & tRNA-splicing endonuclease subunit Sen54	GO:0090501 & GO:0000214 & GO:0000379 & GO:0000213	3.1.27.9 & 3.1.31 & 3.1 & 3.1.27	Acting on ester bonds	PF12928 (PFAM);PTHR21027 (PANTHER)				MS-DArT_site_4855	0
Eucgr.A02344	Chr01	38910036	38920767	-	K05768 - gelsolin (GSN) (1 of 1) & villin-3 isoform X1	GO:0007010, GO:0003779 & GO:0051015 & GO:0051017			PR00597 (PRINTS);SM00262 (SMART);SM00153 (SMART);G3DSA:3.40.20.10 (GENE3D);G3DSA:3.40.20.10 (GENE3D);PF02209 (PFAM);G3DSA:1.10.950.10 (GENE3D);PF00626 (PFAM);G3DSA:3.40.20.10 (GENE3D);PTHR11977:SF46 (PANTHER);PTHR11977 (PANTHER);PS51089 (PROSITE_PROFILES);SSF55753 (SUPERFAMILY);SSF55753 (SUPERFAMILY);SSF55753 (SUPERFAMILY);SSF55753 (SUPERFAMILY);SSF47050 (SUPERFAMILY);SSF55753 (SUPERFAMILY);SSF55…	GO:0003779;GO:0003779;GO:0007010/GO:0003779;GO:0007010/GO:0003779;GO:0007010/GO:0003779;GO:0051017/GO:0051015;GO:0003779;GO:0007010/GO:0003779;GO:0007010/GO:0003779	actin binding;actin binding;cytoskeleton organization/actin binding;cytoskeleton organization/actin binding;cytoskeleton organization/actin binding;actin filament bundle assembly/actin filament binding;actin binding;cytoskeleton organization/actin binding;cytoskeleton organization/actin binding	Molecular Function;Molecular Function;Biological Process/Molecular Function;Biological Process/Molecular Function;Biological Process/Molecular Function;Biological Process/Molecular Function;Molecular Function;Biological Process/Molecular Function;Biological Process/Molecular Function	MS-DArT_site_4886	0
Eucgr.A02349	Chr01	38945948	38950814	-	PTHR31362:SF1 - EXPRESSED PROTEIN (1 of 1) & probable glycosyltransferase STELLO1	GO:0016021			PF03385 (PFAM);PTHR31362 (PANTHER);PTHR31362:SF1 (PANTHER);NON_CYTOPLASMIC_DOMAIN (PHOBIUS);TRANSMEMBRANE (PHOBIUS);CYTOPLASMIC_DOMAIN (PHOBIUS);TMhelix (TMHMM)				MS-DArT_site_4900	0
Eucgr.A02359	Chr01	39075462	39091785	-	K01408 - insulysin (IDE, ide) (1 of 5) & insulin-degrading enzyme-like peroxisomal isoform X1	GO:0008270 & GO:0043171 & GO:0005739 & GO:0016485 & GO:0004222 & GO:0051603	3.4.24.56 & 3.4.24	Insulysin. & Acting on peptide bonds (peptidases)	PF16187 (PFAM);G3DSA:3.30.830.10 (GENE3D);G3DSA:3.30.830.10 (GENE3D);G3DSA:3.30.830.10 (GENE3D);G3DSA:3.30.830.10 (GENE3D);PF05193 (PFAM);PF00675 (PFAM);PTHR11851:SF155 (PANTHER);PTHR11851 (PANTHER);PS00143 (PROSITE_PATTERNS);SSF63411 (SUPERFAMILY);SSF63411 (SUPERFAMILY);SSF63411 (SUPERFAMILY);SSF63411 (SUPERFAMILY)	GO:0046872;GO:0046872;GO:0046872;GO:0046872;GO:0004222/GO:0006508;GO:0003824/GO:0046872;GO:0003824/GO:0046872;GO:0003824/GO:0046872;GO:0003824/GO:0046872	metal ion binding;metal ion binding;metal ion binding;metal ion binding;metalloendopeptidase activity/proteolysis;catalytic activity/metal ion binding;catalytic activity/metal ion binding;catalytic activity/metal ion binding;catalytic activity/metal ion binding	Molecular Function;Molecular Function;Molecular Function;Molecular Function;Molecular Function/Biological Process;Molecular Function/Molecular Function;Molecular Function/Molecular Function;Molecular Function/Molecular Function;Molecular Function/Molecular Function	MS-DArT_site_4919,MS-DArT_site_4917	0,0
Eucgr.A02371	Chr01	39165588	39168127	-	K02981 - small subunit ribosomal protein S2e (RP-S2e, RPS2) (1 of 2) & 40S ribosomal S2-4	GO:0006412, GO:0005840, GO:0003735, GO:0003723 & GO:0003723 & GO:0003735 & GO:0022627 & GO:0006412			G3DSA:3.30.160.20 (GENE3D);PF00333 (PFAM);G3DSA:3.30.230.10 (GENE3D);TIGR01020 (TIGRFAM);PF03719 (PFAM);PTHR13718:SF69 (PANTHER);PTHR13718 (PANTHER);PS00585 (PROSITE_PATTERNS);PS50881 (PROSITE_PROFILES);SSF54768 (SUPERFAMILY);SSF54211 (SUPERFAMILY)	GO:0005840/GO:0003735/GO:0006412/GO:0003723;GO:0006412/GO:0003735/GO:0015935;GO:0005840/GO:0006412/GO:0003735;GO:0005840/GO:0006412/GO:0003735;GO:0005840/GO:0003735/GO:0006412/GO:0003723	ribosome/structural constituent of ribosome/translation/RNA binding;translation/structural constituent of ribosome/small ribosomal subunit;ribosome/translation/structural constituent of ribosome;ribosome/translation/structural constituent of ribosome;ribosome/structural constituent of ribosome/translation/RNA binding	Cellular Component/Molecular Function/Biological Process/Molecular Function;Biological Process/Molecular Function/Cellular Component;Cellular Component/Biological Process/Molecular Function;Cellular Component/Biological Process/Molecular Function;Cellular Component/Molecular Function/Biological Process/Molecular Function	MS-DArT_site_4939|MS-DArT_site_4940	0
Eucgr.A02372	Chr01	39171840	39176044	-	PTHR13301//PTHR13301:SF64 - X-BOX TRANSCRIPTION FACTOR-RELATED // SUBFAMILY NOT NAMED (1 of 2) & Cellulose synthase family	GO:0030244, GO:0016760, GO:0016020 & GO:0008270 & GO:0016021 & GO:0016760 & GO:0030244 & GO:0071555 & GO:0005886	2.4.1.12 & 2.4.1	Cellulose synthase (UDP-forming). & Cellulose synthase (UDP-forming) & Glycosyltransferases	PF03552 (PFAM);PTHR13301 (PANTHER);PTHR13301:SF64 (PANTHER);TRANSMEMBRANE (PHOBIUS);TRANSMEMBRANE (PHOBIUS);TRANSMEMBRANE (PHOBIUS);NON_CYTOPLASMIC_DOMAIN (PHOBIUS);TRANSMEMBRANE (PHOBIUS);CYTOPLASMIC_DOMAIN (PHOBIUS);TRANSMEMBRANE (PHOBIUS);NON_CYTOPLASMIC_DOMAIN (PHOBIUS);NON_CYTOPLASMIC_DOMAIN (PHOBIUS);TRANSMEMBRANE (PHOBIUS);TRANSMEMBRANE (PHOBIUS);TRANSMEMBRANE (PHOBIUS);NON_CYTOPLASMIC_DOM…	GO:0016760/GO:0016020/GO:0030244	cellulose synthase (UDP-forming) activity/membrane/cellulose biosynthetic process	Molecular Function/Cellular Component/Biological Process	MS-DArT_site_4942	0
Eucgr.A02384	Chr01	39300182	39304696	+	PF00642//PF12796 - Zinc finger C-x8-C-x5-C-x3-H type (and similar) (zf-CCCH) // Ankyrin repeats (3 copies) (Ank_2) (1 of 3) & zinc finger CCCH domain-containing 30	GO:0046872 & GO:0005634 & GO:0005737			SM00356 (SMART);SM00248 (SMART);G3DSA:4.10.1000.10 (GENE3D);PF12796 (PFAM);PF00642 (PFAM);G3DSA:1.25.40.20 (GENE3D);PTHR14493 (PANTHER);PTHR14493:SF45 (PANTHER);PTHR14493:SF45 (PANTHER);PTHR14493 (PANTHER);PS50297 (PROSITE_PROFILES);PS50103 (PROSITE_PROFILES);PS50088 (PROSITE_PROFILES);SSF48403 (SUPERFAMILY)	GO:0046872;GO:0005515;GO:0046872;GO:0046872;GO:0046872;GO:0005515	metal ion binding;protein binding;metal ion binding;metal ion binding;metal ion binding;protein binding	Molecular Function;Molecular Function;Molecular Function;Molecular Function;Molecular Function;Molecular Function	MS-DArT_site_4972|MS-DArT_site_4973	0
Eucgr.A02392	Chr01	39350334	39354792	-	PREDICTED: uncharacterized protein LOC104445336	GO:0016021			PTHR34459:SF2 (PANTHER);PTHR34459 (PANTHER);TRANSMEMBRANE (PHOBIUS);CYTOPLASMIC_DOMAIN (PHOBIUS);NON_CYTOPLASMIC_DOMAIN (PHOBIUS);TMhelix (TMHMM);TMhelix (TMHMM)				MS-DArT_site_4977	0
Eucgr.A02406	Chr01	39455417	39456247	+	probable E3 ubiquitin- ligase ARI7 isoform X3								MS-DArT_site_4997,MS-DArT_site_4996	0,0
Eucgr.A02437	Chr01	39723836	39727920	-	PTHR10024:SF243 - ANTHRANILATE PHOSPHORIBOSYLTRANSFERASE-LIKE PROTEIN (1 of 2) & QUIRKY-like	GO:0005515 & GO:0005509 & GO:0016021 & GO:0004609 & GO:0005886 & GO:0005544	4.1.1.65	Phosphatidylserine decarboxylase	SM00239 (SMART);PF08372 (PFAM);G3DSA:2.60.40.150 (GENE3D);G3DSA:2.60.40.150 (GENE3D);PF00168 (PFAM);PTHR10024:SF243 (PANTHER);PTHR10024 (PANTHER);TRANSMEMBRANE (PHOBIUS);TRANSMEMBRANE (PHOBIUS);CYTOPLASMIC_DOMAIN (PHOBIUS);TRANSMEMBRANE (PHOBIUS);NON_CYTOPLASMIC_DOMAIN (PHOBIUS);NON_CYTOPLASMIC_DOMAIN (PHOBIUS);CYTOPLASMIC_DOMAIN (PHOBIUS);PS50004 (PROSITE_PROFILES);SSF49562 (SUPERFAMILY);SSF4956…	GO:0005515;GO:0005515;GO:0005515;GO:0005515;GO:0005515;GO:0005515;GO:0005515;GO:0005515	protein binding;protein binding;protein binding;protein binding;protein binding;protein binding;protein binding;protein binding	Molecular Function;Molecular Function;Molecular Function;Molecular Function;Molecular Function;Molecular Function;Molecular Function;Molecular Function	MS-DArT_site_5056	0
Eucgr.A02444	Chr01	39776908	39779403	-	PTHR31314:SF7 - MYB-LIKE HTH TRANSCRIPTIONAL REGULATOR FAMILY PROTEIN (1 of 1) & myb family transcription factor PHL5-like	GO:0005634 & GO:0003677 & GO:0006351 & GO:0006355			TIGR01557 (TIGRFAM);PF00249 (PFAM);PF14379 (PFAM);G3DSA:1.10.10.60 (GENE3D);PTHR31314 (PANTHER);PTHR31314:SF7 (PANTHER);PS51294 (PROSITE_PROFILES);SSF46689 (SUPERFAMILY)	GO:0003677;GO:0003677	DNA binding;DNA binding	Molecular Function;Molecular Function	MS-DArT_site_5073	0
Eucgr.A02448	Chr01	39813088	39817251	-	K00208 - enoyl- (fabI) (1 of 2) & enoyl-[acyl-carrier- ] reductase [NADH] chloroplastic-like	GO:0004318 & GO:0055114	1.3.1.9 & 2.3.1.85	Enoyl-[acyl-carrier-protein] reductase (NADH). & Fatty-acid synthase & Enoyl-[acyl-carrier-protein] reductase (NADH)	PR00081 (PRINTS);G3DSA:3.40.50.720 (GENE3D);PF13561 (PFAM);PTHR24322 (PANTHER);PTHR24322:SF411 (PANTHER);PTHR24322:SF411 (PANTHER);PTHR24322 (PANTHER);PTHR24322 (PANTHER);PTHR24322:SF411 (PANTHER);PTHR24322:SF411 (PANTHER);PTHR24322 (PANTHER);SSF51735 (SUPERFAMILY)				MS-DArT_site_5088|MS-DArT_site_5089	0
Eucgr.A02449	Chr01	39828993	39830144	+	1.14.19.6 - Delta(12)-fatty-acid desaturase / Oleoyl-CoA Delta(12) desaturase (1 of 2) & delta(12)-fatty-acid desaturase FAD2-like	GO:0055114, GO:0016717, GO:0006629 & GO:0050184 & GO:0016717 & GO:0006629 & GO:0016021 & GO:0055114 & GO:0016720	1.14.19.6, 1.3.1.35 & 1.14.99.33 & 1.14.19 & 1.3.1.35	Delta(12)-fatty-acid desaturase., Phosphatidylcholine desaturase. & Acting on paired donors, with incorporation or reduction of molecular oxygen. The oxygen incorporated need not be derived from O(2) & Acting on the CH-CH group of donors	PF11960 (PFAM);PF00487 (PFAM);PTHR32100:SF16 (PANTHER);PTHR32100 (PANTHER);NON_CYTOPLASMIC_DOMAIN (PHOBIUS);TRANSMEMBRANE (PHOBIUS);CYTOPLASMIC_DOMAIN (PHOBIUS);CYTOPLASMIC_DOMAIN (PHOBIUS);TRANSMEMBRANE (PHOBIUS);CYTOPLASMIC_DOMAIN (PHOBIUS);NON_CYTOPLASMIC_DOMAIN (PHOBIUS);NON_CYTOPLASMIC_DOMAIN (PHOBIUS);CYTOPLASMIC_DOMAIN (PHOBIUS);TRANSMEMBRANE (PHOBIUS);TRANSMEMBRANE (PHOBIUS);TRANSMEMBRANE…	GO:0016717/GO:0055114;GO:0006629	oxidoreductase activity, acting on paired donors, with oxidation of a pair of donors resulting in the reduction of molecular oxygen to two molecules of water/oxidation-reduction process;lipid metabolic process	Molecular Function/Biological Process;Biological Process	MS-DArT_site_5094	0
Eucgr.A02455	Chr01	39865110	39867185	+	PTHR13871//PTHR13871:SF36 - THIOREDOXIN // SUBFAMILY NOT NAMED (1 of 2) & DC1 domain-containing family				PTHR13871:SF36 (PANTHER);PTHR13871 (PANTHER);SSF57889 (SUPERFAMILY)				MS-DArT_site_5102|MS-DArT_site_5103	0
Eucgr.A02496	Chr01	40266647	40274313	+	K12603 - CCR4-NOT transcription complex subunit 6 (CNOT6, CCR4) (1 of 3) & carbon catabolite repressor 4 homolog 1	GO:0004535 & GO:0090503 & GO:0004519	3.1.13.4 & 3.1 & 3.1.13 & 3.1.15	Poly(A)-specific ribonuclease. & Acting on ester bonds & Poly(A)-specific ribonuclease	PF15801 (PFAM);PF03372 (PFAM);G3DSA:3.60.10.10 (GENE3D);PTHR12121 (PANTHER);PTHR12121:SF34 (PANTHER);SSF56219 (SUPERFAMILY)				MS-DArT_site_5159	0
Eucgr.A02507	Chr01	40339711	40363512	+	K14792 - rRNA biogenesis protein RRP5 (RRP5, PDCD11) (1 of 1) & rRNA biogenesis RRP5	GO:0006397, GO:0005634, GO:0003676 & GO:0032040 & GO:0003723 & GO:0006364 & GO:0006397 & GO:0009553 & GO:0005730 & GO:0005886			Coil (COILS);Coil (COILS);SM00316 (SMART);SM00386 (SMART);G3DSA:2.40.50.140 (GENE3D);G3DSA:1.25.40.10 (GENE3D);PF00575 (PFAM);PF05843 (PFAM);G3DSA:2.40.50.140 (GENE3D);G3DSA:2.40.50.140 (GENE3D);PTHR23270:SF10 (PANTHER);PTHR23270 (PANTHER);PS50126 (PROSITE_PROFILES);SSF50249 (SUPERFAMILY);SSF50249 (SUPERFAMILY);SSF50249 (SUPERFAMILY);SSF50249 (SUPERFAMILY);SSF50249 (SUPERFAMILY);SSF50249 (SUPERFA…	GO:0006396;GO:0005515;GO:0003676;GO:0005634/GO:0006397;GO:0003676;GO:0005515	RNA processing;protein binding;nucleic acid binding;nucleus/mRNA processing;nucleic acid binding;protein binding	Biological Process;Molecular Function;Molecular Function;Cellular Component/Biological Process;Molecular Function;Molecular Function	MS-DArT_site_5184|MS-DArT_site_5185,MS-DArT_site_5181,MS-DArT_site_5182|MS-DArT_site_5183	0,0,0
Eucgr.A02534	Chr01	40596426	40599160	-	PTHR10627//PTHR10627:SF43 - SCP160 // SUBFAMILY NOT NAMED (1 of 1) & PREDICTED: uncharacterized protein LOC104446503	GO:0005515			SM00454 (SMART);PF07647 (PFAM);G3DSA:1.10.150.50 (GENE3D);PTHR10627 (PANTHER);PTHR10627:SF43 (PANTHER);PS50105 (PROSITE_PROFILES);SSF47769 (SUPERFAMILY)	GO:0005515;GO:0005515;GO:0005515	protein binding;protein binding;protein binding	Molecular Function;Molecular Function;Molecular Function	MS-DArT_site_5237	0
Eucgr.A02540	Chr01	40649630	40653751	+	PTHR31422:SF0 - F26K24.14 PROTEIN-RELATED (1 of 2) & myosin-binding 7	GO:0016021			Coil (COILS);Coil (COILS);PF04576 (PFAM);PTHR31422 (PANTHER);PTHR31422:SF0 (PANTHER);TRANSMEMBRANE (PHOBIUS);CYTOPLASMIC_DOMAIN (PHOBIUS);NON_CYTOPLASMIC_DOMAIN (PHOBIUS);TMhelix (TMHMM)				MS-DArT_site_5246	0
Eucgr.A02541	Chr01	40655494	40658340	+	PTHR12480:SF21 - TRANSCRIPTION FACTOR JUMONJI, JMJC DOMAIN-CONTAINING PROTEIN (1 of 1) & F-box At5g06550	GO:0016740			SM00558 (SMART);G3DSA:3.80.10.10 (GENE3D);G3DSA:2.60.120.650 (GENE3D);PF13621 (PFAM);PTHR12480:SF21 (PANTHER);PTHR12480 (PANTHER);PS51184 (PROSITE_PROFILES);SSF51197 (SUPERFAMILY);SSF81383 (SUPERFAMILY)	GO:0005515	protein binding	Molecular Function	MS-DArT_site_5250	0
Eucgr.A02543	Chr01	40661830	40668048	-	PTHR12972 - DOWNSTREAM NEIGHBOR OF SON (1 of 1) & downstream neighbor of Son				PR02064 (PRINTS);PTHR12972 (PANTHER)				MS-DArT_site_5260	0
Eucgr.A02545	Chr01	40680075	40686331	+	PTHR24349:SF81 - CALCIUM-DEPENDENT PROTEIN KINASE 20 (1 of 1) & calcium-dependent kinase 20-like	GO:0006468, GO:0004672 & GO:0005634 & GO:0005524 & GO:0005516 & GO:0009738 & GO:0005737 & GO:0005509 & GO:0046777 & GO:0004683 & GO:0018105 & GO:0005886 & GO:0035556 & GO:0009931	2.7.11.1 & 2.7.11 & 2.7.11.17	Non-specific serine/threonine protein kinase. & Transferring phosphorus-containing groups & Calcium/calmodulin-dependent protein kinase	SM00220 (SMART);SM00054 (SMART);PF13499 (PFAM);G3DSA:3.30.200.20 (GENE3D);G3DSA:1.10.238.10 (GENE3D);PF00069 (PFAM);G3DSA:1.10.510.10 (GENE3D);PTHR24349:SF81 (PANTHER);PTHR24349 (PANTHER);PS00018 (PROSITE_PATTERNS);PS00018 (PROSITE_PATTERNS);PS00107 (PROSITE_PATTERNS);PS00018 (PROSITE_PATTERNS);PS00018 (PROSITE_PATTERNS);PS00108 (PROSITE_PATTERNS);PS50222 (PROSITE_PROFILES);PS50222 (PROSITE_PROFI…	GO:0004672/GO:0006468/GO:0005524;GO:0005509;GO:0005509;GO:0004672/GO:0006468/GO:0005524;GO:0005524;GO:0006468/GO:0004672;GO:0005509;GO:0005509;GO:0005509;GO:0004672/GO:0006468/GO:0005524;GO:0005509	protein kinase activity/protein phosphorylation/ATP binding;calcium ion binding;calcium ion binding;protein kinase activity/protein phosphorylation/ATP binding;ATP binding;protein phosphorylation/protein kinase activity;calcium ion binding;calcium ion binding;calcium ion binding;protein kinase activity/protein phosphorylation/ATP binding;calcium ion binding	Molecular Function/Biological Process/Molecular Function;Molecular Function;Molecular Function;Molecular Function/Biological Process/Molecular Function;Molecular Function;Biological Process/Molecular Function;Molecular Function;Molecular Function;Molecular Function;Molecular Function/Biological Process/Molecular Function;Molecular Function	MS-DArT_site_5266	0
Eucgr.A02560	Chr01	40778780	40792039	-	PTHR24006:SF520 - TRAF-LIKE FAMILY PROTEIN-RELATED (1 of 2) & ubiquitin carboxyl-terminal hydrolase 8-like isoform X1	GO:0016579 & GO:0036459 & GO:0006511	3.4.19.12 & 3.4	Ubiquitinyl hydrolase 1. & Acting on peptide bonds (peptidases) & Ubiquitinyl hydrolase 1	PF00443 (PFAM);PTHR24006:SF520 (PANTHER);PTHR24006 (PANTHER);PS00972 (PROSITE_PATTERNS);PS00973 (PROSITE_PATTERNS);PS50235 (PROSITE_PROFILES);SSF54001 (SUPERFAMILY)	GO:0036459/GO:0016579;GO:0006511/GO:0036459;GO:0006511/GO:0036459	thiol-dependent ubiquitinyl hydrolase activity/protein deubiquitination;ubiquitin-dependent protein catabolic process/thiol-dependent ubiquitinyl hydrolase activity;ubiquitin-dependent protein catabolic process/thiol-dependent ubiquitinyl hydrolase activity	Molecular Function/Biological Process;Biological Process/Molecular Function;Biological Process/Molecular Function	MS-DArT_site_5281	0
Eucgr.A02575	Chr01	40903483	40923380	-	PTHR12975 - TRANSPORT PROTEIN TRAPP (1 of 1) & trafficking particle complex subunit 8 isoform X1	GO:0006888 & GO:0044804 & GO:0034497 & GO:0000407 & GO:0030242 & GO:0031410 & GO:1990072 & GO:0032258			G3DSA:1.25.40.10 (GENE3D);PF08626 (PFAM);PF12739 (PFAM);PTHR12975 (PANTHER);PTHR12975:SF6 (PANTHER);SSF48452 (SUPERFAMILY)	GO:0005515;GO:0005515	protein binding;protein binding	Molecular Function;Molecular Function	MS-DArT_site_5295,MS-DArT_site_5293,MS-DArT_site_5296,MS-DArT_site_5294	0,0,0,0
Eucgr.A02578	Chr01	40941464	40958453	+	PTHR23185:SF0 - PROTEIN VIRILIZER HOMOLOG (1 of 1) & Embryo defective				Coil (COILS);PF15912 (PFAM);PTHR23185:SF0 (PANTHER);PTHR23185 (PANTHER);CYTOPLASMIC_DOMAIN (PHOBIUS);NON_CYTOPLASMIC_DOMAIN (PHOBIUS);TRANSMEMBRANE (PHOBIUS);NON_CYTOPLASMIC_DOMAIN (PHOBIUS);TRANSMEMBRANE (PHOBIUS)				MS-DArT_site_5306|MS-DArT_site_5307	0
Eucgr.A02621	Chr01	41446195	41448348	-	PF01535//PF13041 - PPR repeat (PPR) // PPR repeat family (PPR_2) (1 of 235) & pentatricopeptide repeat-containing At5g37570				PF01535 (PFAM);PF13041 (PFAM);TIGR00756 (TIGRFAM);G3DSA:1.25.40.10 (GENE3D);PTHR24015 (PANTHER);PTHR24015:SF139 (PANTHER);PS51375 (PROSITE_PROFILES);PS51375 (PROSITE_PROFILES);PS51375 (PROSITE_PROFILES);PS51375 (PROSITE_PROFILES);PS51375 (PROSITE_PROFILES);PS51375 (PROSITE_PROFILES);PS51375 (PROSITE_PROFILES);PS51375 (PROSITE_PROFILES);PS51375 (PROSITE_PROFILES);PS51375 (PROSITE_PROFILES);PS51375…	GO:0005515;GO:0005515	protein binding;protein binding	Molecular Function;Molecular Function	MS-DArT_site_5402,MS-DArT_site_5401	0,0
Eucgr.A02664	Chr01	41903292	41910131	-	3.6.5.6 - Tubulin GTPase (1 of 3), & cell division homolog 2- chloroplastic-like	GO:0003924 & GO:0005525 & GO:0051301 & GO:0005737	3.6.5.6 & 3.6.1 & 3.6.1.15	Tubulin GTPase. & Acting on acid anhydrides & Nucleoside-triphosphate phosphatase	PR00423 (PRINTS);SM00865 (SMART);SM00864 (SMART);G3DSA:3.40.50.1440 (GENE3D);G3DSA:3.30.1330.20 (GENE3D);PF00091 (PFAM);PF12327 (PFAM);TIGR00065 (TIGRFAM);PTHR30314 (PANTHER);PTHR30314:SF13 (PANTHER);PS01135 (PROSITE_PATTERNS);MF_00909 (HAMAP);SSF55307 (SUPERFAMILY);SSF52490 (SUPERFAMILY)	GO:0003924;GO:0003924;GO:0003924;GO:0003924;GO:0005525;GO:0005737/GO:0005525;GO:0005525;GO:0003924	GTPase activity;GTPase activity;GTPase activity;GTPase activity;GTP binding;cytoplasm/GTP binding;GTP binding;GTPase activity	Molecular Function;Molecular Function;Molecular Function;Molecular Function;Molecular Function;Cellular Component/Molecular Function;Molecular Function;Molecular Function	MS-DArT_site_5487,MS-DArT_site_5488	0,0
Eucgr.A02677	Chr01	42082504	42094705	+	K03155 - timeless (TIMELESS) (1 of 1) & timeless homolog				Coil (COILS);PF05029 (PFAM);PF04821 (PFAM);PTHR22940 (PANTHER);PTHR22940:SF4 (PANTHER)				MS-DArT_site_5522	0
Eucgr.A02683	Chr01	42116760	42120504	+	PTHR10794:SF58 - CAAX AMINO TERMINAL PROTEASE FAMILY PROTEIN (1 of 2) & CAAX amino terminal protease	GO:0016020 & GO:0009507 & GO:0006508 & GO:0016021 & GO:0009643 & GO:0008233			PF02517 (PFAM);PTHR10794:SF58 (PANTHER);PTHR10794 (PANTHER);TRANSMEMBRANE (PHOBIUS);CYTOPLASMIC_DOMAIN (PHOBIUS);NON_CYTOPLASMIC_DOMAIN (PHOBIUS);NON_CYTOPLASMIC_DOMAIN (PHOBIUS);CYTOPLASMIC_DOMAIN (PHOBIUS);TRANSMEMBRANE (PHOBIUS);NON_CYTOPLASMIC_DOMAIN (PHOBIUS);TRANSMEMBRANE (PHOBIUS);CYTOPLASMIC_DOMAIN (PHOBIUS);TRANSMEMBRANE (PHOBIUS);TRANSMEMBRANE (PHOBIUS);TRANSMEMBRANE (PHOBIUS);CYTOPLASM…	GO:0016020	membrane	Cellular Component	MS-DArT_site_5527|MS-DArT_site_5528	0
Eucgr.A02720	Chr01	42483873	42486928	-	PF01535//PF13041 - PPR repeat (PPR) // PPR repeat family (PPR_2) (1 of 235) & pentatricopeptide repeat-containing At4g21190	GO:0016021			TIGR00756 (TIGRFAM);PF01535 (PFAM);PTHR24015:SF628 (PANTHER);PTHR24015 (PANTHER);PS51375 (PROSITE_PROFILES)				MS-DArT_site_5551	0
Eucgr.A02762	Chr01	42792632	42798842	+	PTHR24361//PTHR24361:SF253 - MITOGEN-ACTIVATED KINASE KINASE KINASE // SUBFAMILY NOT NAMED (1 of 1) & mitogen-activated kinase kinase kinase YODA-like	GO:0005524 & GO:0004702 & GO:0005737 & GO:0023014	2.7.11.25 & 2.7.11	Mitogen-activated protein kinase kinase kinase. & Transferring phosphorus-containing groups	SM00220 (SMART);PF00069 (PFAM);G3DSA:1.10.510.10 (GENE3D);G3DSA:3.30.200.20 (GENE3D);PTHR24361 (PANTHER);PTHR24361:SF253 (PANTHER);PS00107 (PROSITE_PATTERNS);PS50011 (PROSITE_PROFILES);SSF56112 (SUPERFAMILY)	GO:0005524/GO:0006468/GO:0004672;GO:0005524/GO:0006468/GO:0004672;GO:0005524;GO:0005524/GO:0006468/GO:0004672	ATP binding/protein phosphorylation/protein kinase activity;ATP binding/protein phosphorylation/protein kinase activity;ATP binding;ATP binding/protein phosphorylation/protein kinase activity	Molecular Function/Biological Process/Molecular Function;Molecular Function/Biological Process/Molecular Function;Molecular Function;Molecular Function/Biological Process/Molecular Function	MS-DArT_site_5591|MS-DArT_site_5592,MS-DArT_site_5593	0,0
Eucgr.A02776	Chr01	42903687	42907068	-	K09598 - signal peptide peptidase-like 3 [EC:3.4.23.-] (SPPL3) (1 of 1) & signal peptide peptidase-like 1	GO:0016021, GO:0004190 & GO:0005802 & GO:0005768 & GO:0033619 & GO:0030660 & GO:0071556 & GO:0071458 & GO:0006465 & GO:0042500 & GO:0005765	3.4.23	Acting on peptide bonds (peptidases)	SM00730 (SMART);PF04258 (PFAM);PTHR12174:SF22 (PANTHER);PTHR12174 (PANTHER);TRANSMEMBRANE (PHOBIUS);NON_CYTOPLASMIC_DOMAIN (PHOBIUS);CYTOPLASMIC_DOMAIN (PHOBIUS);TRANSMEMBRANE (PHOBIUS);CYTOPLASMIC_DOMAIN (PHOBIUS);TRANSMEMBRANE (PHOBIUS);TRANSMEMBRANE (PHOBIUS);NON_CYTOPLASMIC_DOMAIN (PHOBIUS);NON_CYTOPLASMIC_DOMAIN (PHOBIUS);TRANSMEMBRANE (PHOBIUS);TRANSMEMBRANE (PHOBIUS);CYTOPLASMIC_DOMAIN (PH…	GO:0016021/GO:0004190;GO:0004190/GO:0016021;GO:0004190/GO:0016021	integral component of membrane/aspartic-type endopeptidase activity;aspartic-type endopeptidase activity/integral component of membrane;aspartic-type endopeptidase activity/integral component of membrane	Cellular Component/Molecular Function;Molecular Function/Cellular Component;Molecular Function/Cellular Component	MS-DArT_site_5619	0
Eucgr.A02778	Chr01	42934096	42954104	+	K01280 - tripeptidyl-peptidase II [EC:3.4.14.10] (TPP2) (1 of 1) & tripeptidyl-peptidase 2	GO:0006508, GO:0004252 & GO:0009507 & GO:0022626 & GO:0008240 & GO:0006508 & GO:0004252 & GO:0005774	3.4.14.10 & 3.4.21 & 3.4.14	Tripeptidyl-peptidase II. & Acting on peptide bonds (peptidases)	Coil (COILS);Coil (COILS);PR00723 (PRINTS);G3DSA:3.40.50.200 (GENE3D);PF00082 (PFAM);PF12580 (PFAM);PTHR10795:SF351 (PANTHER);PTHR10795 (PANTHER);PS00137 (PROSITE_PATTERNS);PS00138 (PROSITE_PATTERNS);SSF52743 (SUPERFAMILY)	GO:0006508/GO:0004252;GO:0006508/GO:0004252;GO:0006508/GO:0004252	proteolysis/serine-type endopeptidase activity;proteolysis/serine-type endopeptidase activity;proteolysis/serine-type endopeptidase activity	Biological Process/Molecular Function;Biological Process/Molecular Function;Biological Process/Molecular Function	MS-DArT_site_5622|MS-DArT_site_5623	0
Eucgr.A02836	Chr01	43461675	43468689	+	PTHR24221:SF169 - ABC TRANSPORTER B FAMILY MEMBER 28 (1 of 1) & ABC transporter B family member 28	GO:0016887, GO:0005524, GO:0055085, GO:0042626, GO:0016021, GO:0006810 & GO:0005524 & GO:0042626 & GO:0055085 & GO:0009941 & GO:0016021	3.6.3.43 & 3.6.1 & 3.6.1.3 & 3.6.1.15	Peptide-transporting ATPase. & Acting on acid anhydrides & Adenosinetriphosphatase & Nucleoside-triphosphate phosphatase	SM00382 (SMART);PF00005 (PFAM);PF00664 (PFAM);G3DSA:1.20.1560.10 (GENE3D);G3DSA:3.40.50.300 (GENE3D);PTHR24221:SF169 (PANTHER);PTHR24221 (PANTHER);PS00211 (PROSITE_PATTERNS);NON_CYTOPLASMIC_DOMAIN (PHOBIUS);TRANSMEMBRANE (PHOBIUS);TRANSMEMBRANE (PHOBIUS);CYTOPLASMIC_DOMAIN (PHOBIUS);NON_CYTOPLASMIC_DOMAIN (PHOBIUS);TRANSMEMBRANE (PHOBIUS);CYTOPLASMIC_DOMAIN (PHOBIUS);PS50929 (PROSITE_PROFILES);PS…	GO:0016887/GO:0005524;GO:0042626/GO:0005524/GO:0016021/GO:0055085/GO:0006810;GO:0005524/GO:0016887;GO:0042626/GO:0005524/GO:0016021/GO:0055085/GO:0006810;GO:0016887/GO:0005524;GO:0042626/GO:0005524/GO:0016021/GO:0055085/GO:0006810	ATPase activity/ATP binding;ATPase activity, coupled to transmembrane movement of substances/ATP binding/integral component of membrane/transmembrane transport/transport;ATP binding/ATPase activity;ATPase activity, coupled to transmembrane movement of substances/ATP binding/integral component of membrane/transmembrane transport/transport;ATPase activity/ATP binding;ATPase activity, coupled to tra…	Molecular Function/Molecular Function;Molecular Function/Molecular Function/Cellular Component/Biological Process/Biological Process;Molecular Function/Molecular Function;Molecular Function/Molecular Function/Cellular Component/Biological Process/Biological Process;Molecular Function/Molecular Function;Molecular Function/Molecular Function/Cellular Component/Biological Process/Biological Process	MS-DArT_site_5689	0
Eucgr.A02848	Chr01	43557304	43560409	-	PTHR10584//PTHR10584:SF200 - SUGAR KINASE // SUBFAMILY NOT NAMED (1 of 2) & probable fructokinase-7	GO:0004747 & GO:0005829 & GO:0006014 & GO:0046835	2.7.1.4 & 2.7.1.15	Fructokinase. & Ribokinase	PR00990 (PRINTS);PF00294 (PFAM);G3DSA:3.40.1190.20 (GENE3D);PTHR10584 (PANTHER);PTHR10584:SF200 (PANTHER);PS00583 (PROSITE_PATTERNS);PS00584 (PROSITE_PATTERNS);SIGNAL_PEPTIDE_N_REGION (PHOBIUS);NON_CYTOPLASMIC_DOMAIN (PHOBIUS);SIGNAL_PEPTIDE_H_REGION (PHOBIUS);SIGNAL_PEPTIDE_C_REGION (PHOBIUS);SIGNAL_PEPTIDE (PHOBIUS);SignalP-noTM (SIGNALP_EUK);SSF53613 (SUPERFAMILY)	GO:0004747/GO:0006014;GO:0016773;GO:0016773	ribokinase activity/D-ribose metabolic process;phosphotransferase activity, alcohol group as acceptor;phosphotransferase activity, alcohol group as acceptor	Molecular Function/Biological Process;Molecular Function;Molecular Function	MS-DArT_site_5706,MS-DArT_site_5705	0,0
Eucgr.A02851	Chr01	43608638	43611335	-	PTHR10584//PTHR10584:SF200 - SUGAR KINASE // SUBFAMILY NOT NAMED (1 of 2) & probable fructokinase-7	GO:0004747 & GO:0006014 & GO:0046835	2.7.1.4 & 2.7.1.15	Fructokinase. & Ribokinase	PF00294 (PFAM);G3DSA:3.40.1190.20 (GENE3D);PTHR10584 (PANTHER);PTHR10584:SF192 (PANTHER);PS00583 (PROSITE_PATTERNS);SSF53613 (SUPERFAMILY)	GO:0016773	phosphotransferase activity, alcohol group as acceptor	Molecular Function	MS-DArT_site_5710|MS-DArT_site_5711	0
Eucgr.A02866	Chr01	43759097	43762228	-	PTHR22726 - OMA1 HOMOLOG, ZINC METALLOPEPTIDASE (1 of 2) & mitochondrial metalloendopeptidase OMA1	GO:0006508, GO:0004222 & GO:0006508 & GO:0016021 & GO:0004222	3.4.24	Acting on peptide bonds (peptidases)	G3DSA:3.30.2010.10 (GENE3D);PF01435 (PFAM);PTHR22726:SF1 (PANTHER);PTHR22726 (PANTHER);CYTOPLASMIC_DOMAIN (PHOBIUS);NON_CYTOPLASMIC_DOMAIN (PHOBIUS);TRANSMEMBRANE (PHOBIUS);TMhelix (TMHMM)	GO:0006508/GO:0004222	proteolysis/metalloendopeptidase activity	Biological Process/Molecular Function	MS-DArT_site_5744,MS-DArT_site_5743	0,0
Eucgr.A02872	Chr01	43795662	43798891	+	K13458 - disease resistance protein (RAR1) (1 of 1) & cysteine and histidine-rich domain-containing RAR1				PF04968 (PFAM);PTHR12621 (PANTHER);PS51401 (PROSITE_PROFILES)				MS-DArT_site_5761	0
Eucgr.A02895	Chr01	44018559	44026670	+	K06674 - structural maintenance of chromosome 2 (SMC2) (1 of 1) & structural maintenance of chromosomes 2-1	GO:0051276, GO:0005694, GO:0005524, GO:0005515, GO:0007076, GO:0000796 & GO:0005634 & GO:0005524 & GO:0007076 & GO:0000796			Coil (COILS);Coil (COILS);Coil (COILS);Coil (COILS);Coil (COILS);Coil (COILS);Coil (COILS);Coil (COILS);Coil (COILS);SM00968 (SMART);PIRSF005719 (PIRSF);PF02463 (PFAM);G3DSA:3.40.50.300 (GENE3D);PF06470 (PFAM);PTHR18937 (PANTHER);PTHR18937:SF9 (PANTHER);TRANSMEMBRANE (PHOBIUS);NON_CYTOPLASMIC_DOMAIN (PHOBIUS);CYTOPLASMIC_DOMAIN (PHOBIUS);SSF75553 (SUPERFAMILY);SSF52540 (SUPERFAMILY)	GO:0005694/GO:0005515/GO:0005524/GO:0051276;GO:0005694/GO:0005515/GO:0005524/GO:0051276;GO:0000796/GO:0007076;GO:0005694/GO:0005515/GO:0005524/GO:0051276	chromosome/protein binding/ATP binding/chromosome organization;chromosome/protein binding/ATP binding/chromosome organization;condensin complex/mitotic chromosome condensation;chromosome/protein binding/ATP binding/chromosome organization	Cellular Component/Molecular Function/Molecular Function/Biological Process;Cellular Component/Molecular Function/Molecular Function/Biological Process;Cellular Component/Biological Process;Cellular Component/Molecular Function/Molecular Function/Biological Process	MS-DArT_site_5810	0
Eucgr.A02903	Chr01	44103837	44106235	-	K02877 - large subunit ribosomal protein L15e (RP-L15e, RPL15) (1 of 2) & 60S ribosomal L15	GO:0006412, GO:0005840, GO:0003735 & GO:0003735 & GO:0002181 & GO:0022625			SM01384 (SMART);G3DSA:3.40.1120.10 (GENE3D);PF00827 (PFAM);PTHR11847 (PANTHER);PS01194 (PROSITE_PATTERNS);SSF54189 (SUPERFAMILY)	GO:0003735/GO:0005840/GO:0006412;GO:0005840/GO:0003735;GO:0003735/GO:0005840/GO:0006412;GO:0003735/GO:0005840/GO:0006412;GO:0005622/GO:0006412/GO:0003735/GO:0005840;GO:0003735/GO:0005622/GO:0005840/GO:0006412	structural constituent of ribosome/ribosome/translation;ribosome/structural constituent of ribosome;structural constituent of ribosome/ribosome/translation;structural constituent of ribosome/ribosome/translation;intracellular/translation/structural constituent of ribosome/ribosome;structural constituent of ribosome/intracellular/ribosome/translation	Molecular Function/Cellular Component/Biological Process;Cellular Component/Molecular Function;Molecular Function/Cellular Component/Biological Process;Molecular Function/Cellular Component/Biological Process;Cellular Component/Biological Process/Molecular Function/Cellular Component;Molecular Function/Cellular Component/Cellular Component/Biological Process	MS-DArT_site_5829	0
Eucgr.A02904	Chr01	44110300	44113934	+	hypothetical protein EUGRSUZ_A02904				PTHR33625 (PANTHER);PTHR33625:SF3 (PANTHER);CYTOPLASMIC_DOMAIN (PHOBIUS);NON_CYTOPLASMIC_DOMAIN (PHOBIUS);TRANSMEMBRANE (PHOBIUS)				MS-DArT_site_5831	0
Eucgr.A02911	Chr01	44179188	44181898	+	PTHR23500:SF30 - SUGAR TRANSPORT PROTEIN 3 (1 of 5) & hexose carrier HEX6	GO:0055085, GO:0016021 & GO:0005887 & GO:0015992 & GO:0032440 & GO:0005351 & GO:0046323 & GO:0055114 & GO:0005355 & GO:1904659	1.3.1.74	2-alkenal reductase (NAD(P)(+))	PR00171 (PRINTS);PF00083 (PFAM);G3DSA:1.20.1250.20 (GENE3D);TIGR00879 (TIGRFAM);PTHR23500:SF30 (PANTHER);PTHR23500 (PANTHER);PS00216 (PROSITE_PATTERNS);PS00217 (PROSITE_PATTERNS);TRANSMEMBRANE (PHOBIUS);TRANSMEMBRANE (PHOBIUS);TRANSMEMBRANE (PHOBIUS);NON_CYTOPLASMIC_DOMAIN (PHOBIUS);TRANSMEMBRANE (PHOBIUS);TRANSMEMBRANE (PHOBIUS);TRANSMEMBRANE (PHOBIUS);NON_CYTOPLASMIC_DOMAIN (PHOBIUS);NON_CYTOPL…	GO:0022891/GO:0016020/GO:0055085;GO:0055085/GO:0022857/GO:0016021;GO:0022891/GO:0016020/GO:0055085;GO:0005215/GO:0055085/GO:0016021;GO:0005215/GO:0055085/GO:0016021	substrate-specific transmembrane transporter activity/membrane/transmembrane transport;transmembrane transport/transmembrane transporter activity/integral component of membrane;substrate-specific transmembrane transporter activity/membrane/transmembrane transport;transporter activity/transmembrane transport/integral component of membrane;transporter activity/transmembrane transport/integral compo…	Molecular Function/Cellular Component/Biological Process;Biological Process/Molecular Function/Cellular Component;Molecular Function/Cellular Component/Biological Process;Molecular Function/Biological Process/Cellular Component;Molecular Function/Biological Process/Cellular Component	MS-DArT_site_5838	0
Eucgr.A02912	Chr01	44182723	44186964	+	K18470 - Rho GTPase-activating protein 1 (ARHGAP1, CDC42GAP) (1 of 1) & uncharacterized Rho GTPase-activating At5g61530	GO:0007165 & GO:0005737 & GO:0043087			SM00324 (SMART);G3DSA:1.10.555.10 (GENE3D);PF00620 (PFAM);PTHR23176:SF32 (PANTHER);PTHR23176 (PANTHER);PS50238 (PROSITE_PROFILES);SSF48350 (SUPERFAMILY)	GO:0007165;GO:0007165;GO:0007165;GO:0007165;GO:0007165	signal transduction;signal transduction;signal transduction;signal transduction;signal transduction	Biological Process;Biological Process;Biological Process;Biological Process;Biological Process	MS-DArT_site_5841	0
Eucgr.A02913	Chr01	44242901	44247017	+	3.5.1.26 - N(4)-(beta-N-acetylglucosaminyl)-L-asparaginase / N-aspartyl-beta-glucosaminidase (1 of 1) & probable isoaspartyl peptidase L-asparaginase 3 isoform X1	GO:0016787 & GO:0003948	3.5.1.26	N(4)-(beta-N-acetylglucosaminyl)-L-asparaginase. & N(4)-(beta-N-acetylglucosaminyl)-L-asparaginase	PF01112 (PFAM);PTHR10188 (PANTHER);PTHR10188:SF6 (PANTHER);PTHR10188:SF6 (PANTHER);SIGNAL_PEPTIDE (PHOBIUS);SIGNAL_PEPTIDE_N_REGION (PHOBIUS);NON_CYTOPLASMIC_DOMAIN (PHOBIUS);SIGNAL_PEPTIDE_C_REGION (PHOBIUS);SIGNAL_PEPTIDE_H_REGION (PHOBIUS);SSF56235 (SUPERFAMILY);TMhelix (TMHMM)	GO:0016787;GO:0016787	hydrolase activity;hydrolase activity	Molecular Function;Molecular Function	MS-DArT_site_5845	0
Eucgr.A02915	Chr01	44261833	44267567	+	PTHR27003:SF29 - U-BOX DOMAIN-CONTAINING PROTEIN 35-RELATED (1 of 3) & U-box domain-containing 35-like isoform X1	GO:0006950, GO:0016567, GO:0004842, GO:0006468, GO:0004672 & GO:0004842 & GO:0005524 & GO:0004674 & GO:0006468 & GO:0006950 & GO:0016567	2.7.11.1 & 2.7.11	Non-specific serine/threonine protein kinase. & Transferring phosphorus-containing groups	Coil (COILS);Coil (COILS);Coil (COILS);SM00504 (SMART);SM00220 (SMART);G3DSA:3.30.40.10 (GENE3D);PF00582 (PFAM);PF04564 (PFAM);G3DSA:1.10.510.10 (GENE3D);G3DSA:3.30.200.20 (GENE3D);G3DSA:3.40.50.620 (GENE3D);PF07714 (PFAM);PTHR27003 (PANTHER);PTHR27003:SF29 (PANTHER);PS00108 (PROSITE_PATTERNS);PS00107 (PROSITE_PATTERNS);PS50011 (PROSITE_PROFILES);PS51698 (PROSITE_PROFILES);SSF52402 (SUPERFAMILY);…	GO:0004842/GO:0016567;GO:0005524/GO:0006468/GO:0004672;GO:0006950;GO:0004842/GO:0016567;GO:0004672/GO:0006468;GO:0004672/GO:0006468;GO:0005524;GO:0005524/GO:0006468/GO:0004672;GO:0004842/GO:0016567	ubiquitin-protein transferase activity/protein ubiquitination;ATP binding/protein phosphorylation/protein kinase activity;response to stress;ubiquitin-protein transferase activity/protein ubiquitination;protein kinase activity/protein phosphorylation;protein kinase activity/protein phosphorylation;ATP binding;ATP binding/protein phosphorylation/protein kinase activity;ubiquitin-protein transferas…	Molecular Function/Biological Process;Molecular Function/Biological Process/Molecular Function;Biological Process;Molecular Function/Biological Process;Molecular Function/Biological Process;Molecular Function/Biological Process;Molecular Function;Molecular Function/Biological Process/Molecular Function;Molecular Function/Biological Process	MS-DArT_site_5849	0
Eucgr.A02921	Chr01	44300992	44323108	-	K14550 - U3 small nucleolar RNA-associated protein 10 (UTP10, HEATR1) (1 of 1) & U3 small nucleolar RNA-associated 10 and NUC211 domain-containing isoform 1				SM01036 (SMART);PF08146 (PFAM);G3DSA:1.25.10.10 (GENE3D);PTHR13457 (PANTHER);PTHR13457:SF1 (PANTHER);CYTOPLASMIC_DOMAIN (PHOBIUS);TRANSMEMBRANE (PHOBIUS);NON_CYTOPLASMIC_DOMAIN (PHOBIUS);NON_CYTOPLASMIC_DOMAIN (PHOBIUS);TRANSMEMBRANE (PHOBIUS);TRANSMEMBRANE (PHOBIUS);NON_CYTOPLASMIC_DOMAIN (PHOBIUS);CYTOPLASMIC_DOMAIN (PHOBIUS);TRANSMEMBRANE (PHOBIUS);SSF48371 (SUPERFAMILY);SSF48371 (SUPERFAMILY)	GO:0005488;GO:0005488	binding;binding	Molecular Function;Molecular Function	MS-DArT_site_5857,MS-DArT_site_5859	0,0
Eucgr.A02925	Chr01	44357225	44372352	-	PTHR22597 - POLYCOMB GROUP PROTEIN (1 of 2), & polycomb group EMBRYONIC FLOWER 2	GO:0005634 & GO:0006349 & GO:0009910			PF09733 (PFAM);PTHR22597 (PANTHER)				MS-DArT_site_5873	0
Eucgr.A02946	Chr01	44540371	44544334	-	K08288 - protein kinase C substrate 80K-H (PRKCSH) (1 of 4) & Glucosidase 2 subunit partial	GO:0006491 & GO:0009507 & GO:0005516 & GO:0005783 & GO:0042742			PF12999 (PFAM);G3DSA:4.10.400.10 (GENE3D);PTHR12630 (PANTHER);PTHR12630:SF1 (PANTHER)	GO:0005515;GO:0006491	protein binding;N-glycan processing	Molecular Function;Biological Process	MS-DArT_site_5913	0
Eucgr.A02961	Chr01	44630746	44643205	-	K06228 - fused (FU) (1 of 1) & serine threonine- kinase TIO isoform X1	GO:0006468, GO:0005524, GO:0004672 & GO:0005524 & GO:0004672 & GO:0006468 & GO:0044699	2.7.11.1	Non-specific serine/threonine protein kinase.	Coil (COILS);SM00220 (SMART);SM00185 (SMART);PF00069 (PFAM);G3DSA:1.25.10.10 (GENE3D);G3DSA:1.10.510.10 (GENE3D);PTHR22983:SF6 (PANTHER);PTHR22983 (PANTHER);PTHR22983 (PANTHER);PTHR22983:SF6 (PANTHER);PS00107 (PROSITE_PATTERNS);PS00108 (PROSITE_PATTERNS);PS50011 (PROSITE_PROFILES);SSF48371 (SUPERFAMILY);SSF56112 (SUPERFAMILY)	GO:0004672/GO:0006468/GO:0005524;GO:0005515;GO:0004672/GO:0006468/GO:0005524;GO:0005524;GO:0006468/GO:0004672;GO:0004672/GO:0006468/GO:0005524;GO:0005488	protein kinase activity/protein phosphorylation/ATP binding;protein binding;protein kinase activity/protein phosphorylation/ATP binding;ATP binding;protein phosphorylation/protein kinase activity;protein kinase activity/protein phosphorylation/ATP binding;binding	Molecular Function/Biological Process/Molecular Function;Molecular Function;Molecular Function/Biological Process/Molecular Function;Molecular Function;Biological Process/Molecular Function;Molecular Function/Biological Process/Molecular Function;Molecular Function	MS-DArT_site_5930	0
Eucgr.A02966	Chr01	44668853	44682734	-	K14290 - exportin-1 (XPO1, CRM1) (1 of 1) & EXPORTIN 1A	GO:0008536, GO:0006886 & GO:0006886 & GO:0008536 & GO:0005622			SM01102 (SMART);SM00913 (SMART);PF03810 (PFAM);G3DSA:1.25.10.10 (GENE3D);G3DSA:1.25.10.10 (GENE3D);PF08389 (PFAM);G3DSA:1.25.10.10 (GENE3D);PF08767 (PFAM);PTHR11223 (PANTHER);PS50166 (PROSITE_PROFILES);SSF48371 (SUPERFAMILY)	GO:0006886/GO:0008536;GO:0006886/GO:0008536;GO:0006886/GO:0008536;GO:0005488	intracellular protein transport/Ran GTPase binding;intracellular protein transport/Ran GTPase binding;intracellular protein transport/Ran GTPase binding;binding	Biological Process/Molecular Function;Biological Process/Molecular Function;Biological Process/Molecular Function;Molecular Function	MS-DArT_site_5937	0
Eucgr.A02967	Chr01	44687360	44692515	+	PTHR10585:SF26 - ER LUMEN PROTEIN RETAINING RECEPTOR (1 of 2) & ER lumen -retaining receptor	GO:0046923, GO:0016021, GO:0006621 & GO:0005789 & GO:0015031 & GO:0016021 & GO:0046923 & GO:0006621			PR00660 (PRINTS);PF00810 (PFAM);PTHR10585:SF26 (PANTHER);PTHR10585 (PANTHER);PS00951 (PROSITE_PATTERNS);PS00952 (PROSITE_PATTERNS);CYTOPLASMIC_DOMAIN (PHOBIUS);NON_CYTOPLASMIC_DOMAIN (PHOBIUS);CYTOPLASMIC_DOMAIN (PHOBIUS);TRANSMEMBRANE (PHOBIUS);TRANSMEMBRANE (PHOBIUS);NON_CYTOPLASMIC_DOMAIN (PHOBIUS);TRANSMEMBRANE (PHOBIUS);NON_CYTOPLASMIC_DOMAIN (PHOBIUS);TRANSMEMBRANE (PHOBIUS);CYTOPLASMIC_DOM…	GO:0016021/GO:0006621/GO:0046923;GO:0016021/GO:0006621/GO:0046923;GO:0016021/GO:0006621/GO:0046923;GO:0016021/GO:0006621/GO:0046923;GO:0016021/GO:0006621/GO:0046923	integral component of membrane/protein retention in ER lumen/ER retention sequence binding;integral component of membrane/protein retention in ER lumen/ER retention sequence binding;integral component of membrane/protein retention in ER lumen/ER retention sequence binding;integral component of membrane/protein retention in ER lumen/ER retention sequence binding;integral component of membrane/prot…	Cellular Component/Biological Process/Molecular Function;Cellular Component/Biological Process/Molecular Function;Cellular Component/Biological Process/Molecular Function;Cellular Component/Biological Process/Molecular Function;Cellular Component/Biological Process/Molecular Function	MS-DArT_site_5939	0
Eucgr.A02969	Chr01	44701530	44710890	+	PF01535//PF13041 - PPR repeat (PPR) // PPR repeat family (PPR_2) (1 of 235) & pentatricopeptide repeat-containing At5g27270 isoform X1				PF01535 (PFAM);TIGR00756 (TIGRFAM);G3DSA:1.25.40.10 (GENE3D);G3DSA:1.25.40.10 (GENE3D);PF13812 (PFAM);PF17177 (PFAM);G3DSA:1.25.40.10 (GENE3D);PF13041 (PFAM);PTHR24015:SF321 (PANTHER);PTHR24015 (PANTHER);PS51375 (PROSITE_PROFILES);SSF48452 (SUPERFAMILY);SSF48452 (SUPERFAMILY)	GO:0005515;GO:0005515;GO:0005515;GO:0005515;GO:0005515	protein binding;protein binding;protein binding;protein binding;protein binding	Molecular Function;Molecular Function;Molecular Function;Molecular Function;Molecular Function	MS-DArT_site_5944,MS-DArT_site_5943	0,0
Eucgr.A02971	Chr01	44715454	44720326	-	PTHR13856//PTHR13856:SF93 - VHS DOMAIN CONTAINING PROTEIN FAMILY // SUBFAMILY NOT NAMED (1 of 2), & TOM1 2	GO:0006886, GO:0005622 & GO:0005829 & GO:0006886 & GO:0005886			SM00288 (SMART);G3DSA:1.20.58.160 (GENE3D);PF00790 (PFAM);PF03127 (PFAM);G3DSA:1.25.40.90 (GENE3D);PTHR13856:SF93 (PANTHER);PTHR13856 (PANTHER);PS50179 (PROSITE_PROFILES);PS50909 (PROSITE_PROFILES);SSF89009 (SUPERFAMILY);SSF48464 (SUPERFAMILY)	GO:0006886;GO:0005622/GO:0006886;GO:0006886;GO:0005622/GO:0006886;GO:0006886;GO:0005622/GO:0006886	intracellular protein transport;intracellular/intracellular protein transport;intracellular protein transport;intracellular/intracellular protein transport;intracellular protein transport;intracellular/intracellular protein transport	Biological Process;Cellular Component/Biological Process;Biological Process;Cellular Component/Biological Process;Biological Process;Cellular Component/Biological Process	MS-DArT_site_5948,MS-DArT_site_5949,MS-DArT_site_5947,MS-DArT_site_5950	0,0,0,0
Eucgr.A02991	Chr01	44878354	44888933	-	RING FYVE PHD zinc finger superfamily isoform 2	GO:0008270			SM00249 (SMART);G3DSA:3.30.40.10 (GENE3D);PTHR33304:SF1 (PANTHER);PTHR33304 (PANTHER);PS50016 (PROSITE_PROFILES);SSF57903 (SUPERFAMILY)	GO:0005515/GO:0008270;GO:0005515	protein binding/zinc ion binding;protein binding	Molecular Function/Molecular Function;Molecular Function	MS-DArT_site_5978,MS-DArT_site_5979	0,0
Eucgr.A02992	Chr01	44889904	44901559	+	K02605 - origin recognition complex subunit 3 (ORC3) (1 of 1) & origin of replication complex subunit 3 isoform X1	GO:0006260, GO:0005664, GO:0003677 & GO:0003677 & GO:0006260 & GO:0005664			PF07034 (PFAM);PTHR12748 (PANTHER);PTHR12748:SF0 (PANTHER)	GO:0006260/GO:0005664/GO:0003677;GO:0006260/GO:0005664/GO:0003677	DNA replication/nuclear origin of replication recognition complex/DNA binding;DNA replication/nuclear origin of replication recognition complex/DNA binding	Biological Process/Cellular Component/Molecular Function;Biological Process/Cellular Component/Molecular Function	MS-DArT_site_5985	0
Eucgr.B00072	Chr02	139227	150558	+	PTHR13140:SF270 - MYOSIN-12 (1 of 4) & myosin-12	GO:0005515, GO:0016459, GO:0005524, GO:0003774 & GO:0016459 & GO:0005524 & GO:0003779 & GO:0003774	3.6.4.1 & 3.6.1 & 3.6.1.15	Myosin ATPase. & Acting on acid anhydrides & Nucleoside-triphosphate phosphatase	Coil (COILS);Coil (COILS);PR00193 (PRINTS);SM01132 (SMART);SM00242 (SMART);SM00015 (SMART);PF01843 (PFAM);G3DSA:3.40.50.300 (GENE3D);PF00612 (PFAM);PF00063 (PFAM);G3DSA:3.40.50.300 (GENE3D);PTHR13140 (PANTHER);PTHR13140:SF270 (PANTHER);SIGNAL_PEPTIDE_C_REGION (PHOBIUS);SIGNAL_PEPTIDE_N_REGION (PHOBIUS);SIGNAL_PEPTIDE (PHOBIUS);NON_CYTOPLASMIC_DOMAIN (PHOBIUS);SIGNAL_PEPTIDE_H_REGION (PHOBIUS);PS5…	GO:0016459/GO:0003774/GO:0005524;GO:0016459/GO:0003774/GO:0005524;GO:0005515;GO:0005515;GO:0016459/GO:0003774/GO:0005524;GO:0005515;GO:0016459/GO:0003774/GO:0005524;GO:0005515;GO:0005515;GO:0005515	myosin complex/motor activity/ATP binding;myosin complex/motor activity/ATP binding;protein binding;protein binding;myosin complex/motor activity/ATP binding;protein binding;myosin complex/motor activity/ATP binding;protein binding;protein binding;protein binding	Cellular Component/Molecular Function/Molecular Function;Cellular Component/Molecular Function/Molecular Function;Molecular Function;Molecular Function;Cellular Component/Molecular Function/Molecular Function;Molecular Function;Cellular Component/Molecular Function/Molecular Function;Molecular Function;Molecular Function;Molecular Function	MS-DArT_site_6017	0
Eucgr.B00073	Chr02	179562	185364	+	PTHR10159//PTHR10159:SF346 - DUAL SPECIFICITY PROTEIN PHOSPHATASE // SUBFAMILY NOT NAMED (1 of 1) & dual specificity phosphatase PHS1 isoform X1	GO:0008138, GO:0006470 & GO:0004725 & GO:0016310 & GO:0016301 & GO:0035335 & GO:0008138	3.1.3.16, 3.1.3.48 & 3.1.3.16 & 3.1 & 3.1.3.48 & 3.1.3.41 & 3.1.3	Phosphoprotein phosphatase., Protein-tyrosine-phosphatase. & Protein-serine/threonine phosphatase & Acting on ester bonds & Protein-tyrosine-phosphatase & 4-nitrophenylphosphatase	SM00195 (SMART);G3DSA:3.90.190.10 (GENE3D);PF00782 (PFAM);G3DSA:1.10.1070.11 (GENE3D);G3DSA:3.30.1010.10 (GENE3D);PF09192 (PFAM);PTHR10159:SF346 (PANTHER);PTHR10159 (PANTHER);PS00383 (PROSITE_PATTERNS);PS50054 (PROSITE_PROFILES);PS50056 (PROSITE_PROFILES);SSF52799 (SUPERFAMILY);SSF56112 (SUPERFAMILY)	GO:0008138/GO:0006470;GO:0008138/GO:0006470;GO:0016301;GO:0016791/GO:0016311/GO:0004725;GO:0008138/GO:0006470;GO:0016791/GO:0016311	protein tyrosine/serine/threonine phosphatase activity/protein dephosphorylation;protein tyrosine/serine/threonine phosphatase activity/protein dephosphorylation;kinase activity;phosphatase activity/dephosphorylation/protein tyrosine phosphatase activity;protein tyrosine/serine/threonine phosphatase activity/protein dephosphorylation;phosphatase activity/dephosphorylation	Molecular Function/Biological Process;Molecular Function/Biological Process;Molecular Function;Molecular Function/Biological Process/Molecular Function;Molecular Function/Biological Process;Molecular Function/Biological Process	MS-DArT_site_6023	0
Eucgr.B00103	Chr02	378992	382009	+	PTHR24078//PTHR24078:SF211 - DNAJ HOMOLOG SUBFAMILY C MEMBER // SUBFAMILY NOT NAMED (1 of 3) & meiotically up-regulated gene 184 -like				PR00625 (PRINTS);SM00271 (SMART);G3DSA:1.10.287.110 (GENE3D);PF11926 (PFAM);PF00226 (PFAM);PTHR24078 (PANTHER);PTHR24078:SF211 (PANTHER);PS50076 (PROSITE_PROFILES);SSF46565 (SUPERFAMILY)				MS-DArT_site_6062	0
Eucgr.B00129	Chr02	719166	728333	-	3.5.2.6 - Beta-lactamase / Penicillinase (1 of 1) & ribonuclease J isoform X1	GO:0046872, GO:0003723 & GO:0003677 & GO:0009507 & GO:0003723 & GO:0046872 & GO:0016021	3.5.2.6	Beta-lactamase.	SM00849 (SMART);PF13837 (PFAM);PF07521 (PFAM);PF12706 (PFAM);G3DSA:1.10.10.60 (GENE3D);G3DSA:3.60.15.10 (GENE3D);PTHR11203 (PANTHER);PTHR11203:SF22 (PANTHER);PS50090 (PROSITE_PROFILES);SSF56281 (SUPERFAMILY)	GO:0003677;GO:0046872/GO:0003723	DNA binding;metal ion binding/RNA binding	Molecular Function;Molecular Function/Molecular Function	MS-DArT_site_6124	0
Eucgr.B00141	Chr02	838285	844121	+	PTHR22880:SF156 - TRANSCRIPTION FACTOR GTE10 (1 of 2) & transcription factor GTE10	GO:0005515 & GO:0016746			Coil (COILS);Coil (COILS);PR00503 (PRINTS);SM00297 (SMART);G3DSA:1.20.920.10 (GENE3D);PF17035 (PFAM);PF00439 (PFAM);PTHR22880 (PANTHER);PTHR22880:SF156 (PANTHER);PS51525 (PROSITE_PROFILES);PS50014 (PROSITE_PROFILES);SSF47370 (SUPERFAMILY)	GO:0005515;GO:0005515;GO:0005515;GO:0005515;GO:0005515;GO:0005515	protein binding;protein binding;protein binding;protein binding;protein binding;protein binding	Molecular Function;Molecular Function;Molecular Function;Molecular Function;Molecular Function;Molecular Function	MS-DArT_site_6150,MS-DArT_site_6151	0,0
Eucgr.B00150	Chr02	907040	915472	-	KOG1230 - Protein containing repeated kelch motifs (1 of 1) & kelch domain-containing 4				G3DSA:2.120.10.80 (GENE3D);PF13422 (PFAM);PF13415 (PFAM);PTHR23244 (PANTHER);PTHR23244:SF304 (PANTHER);SSF117281 (SUPERFAMILY)	GO:0005515	protein binding	Molecular Function	MS-DArT_site_6158	0
Eucgr.B00160	Chr02	1046416	1077041	+	PTHR12741:SF5 - CALLOSE SYNTHASE 10 (1 of 1) & callose synthase 10	GO:0016020, GO:0006075, GO:0003843, GO:0000148 & GO:0003843 & GO:0006075 & GO:0016021 & GO:0000148	2.4.1.34 & 2.4.1	1,3-beta-glucan synthase. & 1,3-beta-glucan synthase & Glycosyltransferases	Coil (COILS);SM01205 (SMART);PF02364 (PFAM);PF14288 (PFAM);PTHR12741:SF5 (PANTHER);PTHR12741 (PANTHER);TRANSMEMBRANE (PHOBIUS);CYTOPLASMIC_DOMAIN (PHOBIUS);TRANSMEMBRANE (PHOBIUS);TRANSMEMBRANE (PHOBIUS);NON_CYTOPLASMIC_DOMAIN (PHOBIUS);TRANSMEMBRANE (PHOBIUS);TRANSMEMBRANE (PHOBIUS);TRANSMEMBRANE (PHOBIUS);TRANSMEMBRANE (PHOBIUS);NON_CYTOPLASMIC_DOMAIN (PHOBIUS);TRANSMEMBRANE (PHOBIUS);NON_CYTOP…	GO:0006075/GO:0003843/GO:0000148/GO:0016020	(1->3)-beta-D-glucan biosynthetic process/1,3-beta-D-glucan synthase activity/1,3-beta-D-glucan synthase complex/membrane	Biological Process/Molecular Function/Cellular Component/Cellular Component	MS-DArT_site_6185	0
Eucgr.B00161	Chr02	1078314	1083979	-	PTHR12506:SF20 - ZINC FINGER CCCH DOMAIN-CONTAINING PROTEIN 43 (1 of 2), & zinc finger CCCH domain-containing 43 isoform X1	GO:0046872			SM00356 (SMART);PF00642 (PFAM);G3DSA:4.10.1000.10 (GENE3D);PTHR12506:SF20 (PANTHER);PTHR12506 (PANTHER);SIGNAL_PEPTIDE_C_REGION (PHOBIUS);NON_CYTOPLASMIC_DOMAIN (PHOBIUS);SIGNAL_PEPTIDE (PHOBIUS);SIGNAL_PEPTIDE_N_REGION (PHOBIUS);SIGNAL_PEPTIDE_H_REGION (PHOBIUS);PS50103 (PROSITE_PROFILES);PS50103 (PROSITE_PROFILES);PS50103 (PROSITE_PROFILES);PS50103 (PROSITE_PROFILES);PS50103 (PROSITE_PROFILES);…	GO:0046872;GO:0046872;GO:0046872;GO:0046872;GO:0046872;GO:0046872;GO:0046872;GO:0046872;GO:0046872;GO:0046872;GO:0046872;GO:0046872;GO:0046872	metal ion binding;metal ion binding;metal ion binding;metal ion binding;metal ion binding;metal ion binding;metal ion binding;metal ion binding;metal ion binding;metal ion binding;metal ion binding;metal ion binding;metal ion binding	Molecular Function;Molecular Function;Molecular Function;Molecular Function;Molecular Function;Molecular Function;Molecular Function;Molecular Function;Molecular Function;Molecular Function;Molecular Function;Molecular Function;Molecular Function	MS-DArT_site_6187,MS-DArT_site_6186	0,0
Eucgr.B00165	Chr02	1138378	1140993	-	PF13041 - PPR repeat family (PPR_2) (1 of 527) & pentatricopeptide repeat-containing chloroplastic				PF13041 (PFAM);TIGR00756 (TIGRFAM);G3DSA:1.25.40.10 (GENE3D);PF01535 (PFAM);PF13812 (PFAM);PTHR24015 (PANTHER);PTHR24015:SF606 (PANTHER);PS51375 (PROSITE_PROFILES);PS51375 (PROSITE_PROFILES);PS51375 (PROSITE_PROFILES);PS51375 (PROSITE_PROFILES);PS51375 (PROSITE_PROFILES);PS51375 (PROSITE_PROFILES);PS51375 (PROSITE_PROFILES);PS51375 (PROSITE_PROFILES);PS51375 (PROSITE_PROFILES);PS51375 (PROSITE_PR…	GO:0005515	protein binding	Molecular Function	MS-DArT_site_6201|MS-DArT_site_6202	0
Eucgr.B00166	Chr02	1142772	1147494	-	PTHR23083:SF343 - BARDET-BIEDL SYNDROME 4 PROTEIN HOMOLOG (1 of 1) & probable UDP-N-acetylglucosamine--peptide N-acetylglucosaminyltransferase SPINDLY	GO:0005515 & GO:0016757	2.4.1.255	Protein O-GlcNAc transferase.	Coil (COILS);SM00028 (SMART);PF13424 (PFAM);G3DSA:1.25.40.10 (GENE3D);PF13181 (PFAM);PF13432 (PFAM);G3DSA:1.25.40.10 (GENE3D);PTHR23083 (PANTHER);PTHR23083:SF343 (PANTHER);PTHR23083:SF343 (PANTHER);PTHR23083 (PANTHER);PS50005 (PROSITE_PROFILES);PS50293 (PROSITE_PROFILES);PS50005 (PROSITE_PROFILES);PS50005 (PROSITE_PROFILES);PS50005 (PROSITE_PROFILES);PS50005 (PROSITE_PROFILES);PS50293 (PROSITE_PR…	GO:0005515;GO:0005515;GO:0005515;GO:0005515;GO:0005515;GO:0005515;GO:0005515;GO:0005515;GO:0005515;GO:0005515;GO:0005515;GO:0005515;GO:0005515;GO:0005515;GO:0005515;GO:0005515;GO:0005515	protein binding;protein binding;protein binding;protein binding;protein binding;protein binding;protein binding;protein binding;protein binding;protein binding;protein binding;protein binding;protein binding;protein binding;protein binding;protein binding;protein binding	Molecular Function;Molecular Function;Molecular Function;Molecular Function;Molecular Function;Molecular Function;Molecular Function;Molecular Function;Molecular Function;Molecular Function;Molecular Function;Molecular Function;Molecular Function;Molecular Function;Molecular Function;Molecular Function;Molecular Function	MS-DArT_site_6204,MS-DArT_site_6206	0,0
Eucgr.B00173	Chr02	1183834	1187410	-	K17890 - autophagy-related protein 16, animal type (ATG16L) (1 of 1) & autophagy-related 16	GO:0005515 & GO:0000045 & GO:0016905 & GO:0006468 & GO:0000421	2.7.11 & 2.7.11.17 & 2.7.11.7	Transferring phosphorus-containing groups & Calcium/calmodulin-dependent protein kinase & [Myosin heavy-chain] kinase	Coil (COILS);Coil (COILS);Coil (COILS);Coil (COILS);PR00320 (PRINTS);SM00320 (SMART);PF08614 (PFAM);G3DSA:2.130.10.10 (GENE3D);PF00400 (PFAM);PTHR19878 (PANTHER);PS00678 (PROSITE_PATTERNS);PS50294 (PROSITE_PROFILES);PS50082 (PROSITE_PROFILES);SSF50978 (SUPERFAMILY)	GO:0005515;GO:0005515;GO:0005515;GO:0005515;GO:0005515;GO:0005515	protein binding;protein binding;protein binding;protein binding;protein binding;protein binding	Molecular Function;Molecular Function;Molecular Function;Molecular Function;Molecular Function;Molecular Function	MS-DArT_site_6221	0
Eucgr.B00214	Chr02	1789208	1791461	+	PTHR15680:SF9 - 39S RIBOSOMAL PROTEIN L19, MITOCHONDRIAL (1 of 1) & 50S ribosomal chloroplastic-like	GO:0006412, GO:0005840, GO:0005622, GO:0003735 & GO:0003735 & GO:0005840 & GO:0006412			PR00061 (PRINTS);TIGR01024 (TIGRFAM);PF01245 (PFAM);PTHR15680 (PANTHER);PTHR15680:SF9 (PANTHER);SSF50104 (SUPERFAMILY)	GO:0005840/GO:0003735/GO:0005622/GO:0006412;GO:0005840/GO:0003735/GO:0005622/GO:0006412;GO:0005840/GO:0003735/GO:0005622/GO:0006412;GO:0005840/GO:0003735/GO:0005622/GO:0006412	ribosome/structural constituent of ribosome/intracellular/translation;ribosome/structural constituent of ribosome/intracellular/translation;ribosome/structural constituent of ribosome/intracellular/translation;ribosome/structural constituent of ribosome/intracellular/translation	Cellular Component/Molecular Function/Cellular Component/Biological Process;Cellular Component/Molecular Function/Cellular Component/Biological Process;Cellular Component/Molecular Function/Cellular Component/Biological Process;Cellular Component/Molecular Function/Cellular Component/Biological Process	MS-DArT_site_6277	0
Eucgr.B00215	Chr02	1794819	1799273	+	K08867 - WNK lysine deficient protein kinase [EC:2.7.11.1] (WNK, PRKWNK) (1 of 10) & probable serine threonine- kinase WNK3 isoform X1	GO:0006468, GO:0005524, GO:0004672 & GO:0005524 & GO:0005829 & GO:0004674 & GO:0006468 & GO:0035556	2.7.11.1 & 2.7.11	Non-specific serine/threonine protein kinase. & Transferring phosphorus-containing groups	Coil (COILS);SM00220 (SMART);G3DSA:1.10.510.10 (GENE3D);PF00069 (PFAM);G3DSA:3.30.200.20 (GENE3D);G3DSA:3.10.20.90 (GENE3D);PTHR13902 (PANTHER);PS00108 (PROSITE_PATTERNS);PS50011 (PROSITE_PROFILES);SSF56112 (SUPERFAMILY)	GO:0006468/GO:0005524/GO:0004672;GO:0006468/GO:0005524/GO:0004672;GO:0004672/GO:0006468;GO:0006468/GO:0005524/GO:0004672	protein phosphorylation/ATP binding/protein kinase activity;protein phosphorylation/ATP binding/protein kinase activity;protein kinase activity/protein phosphorylation;protein phosphorylation/ATP binding/protein kinase activity	Biological Process/Molecular Function/Molecular Function;Biological Process/Molecular Function/Molecular Function;Molecular Function/Biological Process;Biological Process/Molecular Function/Molecular Function	MS-DArT_site_6279	0
Eucgr.B00222	Chr02	1828690	1831638	-	PTHR23257//PTHR23257:SF473 - SERINE-THREONINE PROTEIN KINASE // SUBFAMILY NOT NAMED (1 of 2) & serine threonine- kinase HT1-like	GO:0005524 & GO:0000165 & GO:0000186 & GO:0004709 & GO:0005622	2.7.12.1 & 2.7.11.25 & 2.7.11	Dual-specificity kinase. & Mitogen-activated protein kinase kinase kinase & Transferring phosphorus-containing groups	PR00109 (PRINTS);SM00220 (SMART);PF07714 (PFAM);G3DSA:3.30.200.20 (GENE3D);G3DSA:1.10.510.10 (GENE3D);PTHR23257:SF473 (PANTHER);PTHR23257 (PANTHER);PS00107 (PROSITE_PATTERNS);PS00108 (PROSITE_PATTERNS);PS50011 (PROSITE_PROFILES);SSF56112 (SUPERFAMILY)	GO:0004672/GO:0006468;GO:0006468/GO:0005524/GO:0004672;GO:0004672/GO:0006468;GO:0005524;GO:0004672/GO:0006468;GO:0006468/GO:0005524/GO:0004672	protein kinase activity/protein phosphorylation;protein phosphorylation/ATP binding/protein kinase activity;protein kinase activity/protein phosphorylation;ATP binding;protein kinase activity/protein phosphorylation;protein phosphorylation/ATP binding/protein kinase activity	Molecular Function/Biological Process;Biological Process/Molecular Function/Molecular Function;Molecular Function/Biological Process;Molecular Function;Molecular Function/Biological Process;Biological Process/Molecular Function/Molecular Function	MS-DArT_site_6285	0
Eucgr.B00228	Chr02	1887392	1897010	+	PTHR10638//PTHR10638:SF34 - COPPER AMINE OXIDASE // SUBFAMILY NOT NAMED (1 of 2) & copper methylamine oxidase-like	GO:0055114, GO:0048038, GO:0009308, GO:0008131, GO:0005507 & GO:0009308 & GO:0005507 & GO:0048038 & GO:0008131 & GO:0055114	1.4.3.21	Primary-amine oxidase. & Primary-amine oxidase	Coil (COILS);SM00185 (SMART);G3DSA:3.10.450.40 (GENE3D);PF02728 (PFAM);G3DSA:1.25.10.10 (GENE3D);G3DSA:2.70.98.20 (GENE3D);G3DSA:3.10.450.40 (GENE3D);PF01179 (PFAM);PTHR10638:SF34 (PANTHER);PTHR10638 (PANTHER);PS50176 (PROSITE_PROFILES);SSF54416 (SUPERFAMILY);SSF49998 (SUPERFAMILY);SSF48371 (SUPERFAMILY);SSF54416 (SUPERFAMILY)	GO:0005515;GO:0005507/GO:0048038/GO:0055114/GO:0009308/GO:0008131;GO:0055114/GO:0008131/GO:0005507/GO:0048038/GO:0009308;GO:0055114/GO:0008131/GO:0005507/GO:0048038/GO:0009308;GO:0009308/GO:0048038/GO:0008131/GO:0005507/GO:0055114;GO:0005515;GO:0005507/GO:0008131/GO:0055114/GO:0048038/GO:0009308;GO:0055114/GO:0008131/GO:0005507/GO:0048038/GO:0009308;GO:0005488;GO:0005507/GO:0008131/GO:0055114/GO:…	protein binding;copper ion binding/quinone binding/oxidation-reduction process/amine metabolic process/primary amine oxidase activity;oxidation-reduction process/primary amine oxidase activity/copper ion binding/quinone binding/amine metabolic process;oxidation-reduction process/primary amine oxidase activity/copper ion binding/quinone binding/amine metabolic process;amine metabolic process/quino…	Molecular Function;Molecular Function/Molecular Function/Biological Process/Biological Process/Molecular Function;Biological Process/Molecular Function/Molecular Function/Molecular Function/Biological Process;Biological Process/Molecular Function/Molecular Function/Molecular Function/Biological Process;Biological Process/Molecular Function/Molecular Function/Molecular Function/Biological Process;…	MS-DArT_site_6308	0
Eucgr.B00238	Chr02	2075490	2081326	-	2.6.1.27 - Tryptophan transaminase / Tryptophan aminotransferase (1 of 2) & tryptophan aminotransferase-related 2-like	GO:0016846 & GO:0005789 & GO:0009958 & GO:0010087 & GO:0048467 & GO:0043562 & GO:0016740 & GO:0010078 & GO:0042742 & GO:0009723 & GO:0048527	2.6.1.99, 2.6.1.27	L-tryptophan--pyruvate aminotransferase., Tryptophan transaminase.	PF04864 (PFAM);G3DSA:3.40.640.10 (GENE3D);G3DSA:3.90.1150.10 (GENE3D);G3DSA:2.10.25.30 (GENE3D);PTHR11751 (PANTHER);PTHR11751:SF434 (PANTHER);CYTOPLASMIC_DOMAIN (PHOBIUS);NON_CYTOPLASMIC_DOMAIN (PHOBIUS);TRANSMEMBRANE (PHOBIUS);SSF53383 (SUPERFAMILY)	GO:0016846;GO:0003824;GO:0003824;GO:0016846	carbon-sulfur lyase activity;catalytic activity;catalytic activity;carbon-sulfur lyase activity	Molecular Function;Molecular Function;Molecular Function;Molecular Function	MS-DArT_site_6329|MS-DArT_site_6330	0
Eucgr.B00242	Chr02	2162548	2168068	-	K13525 - transitional endoplasmic reticulum ATPase (VCP, CDC48) (1 of 5) & cell division cycle 48 homolog	GO:0005524, GO:0009378, GO:0006310, GO:0006281 & GO:0051301 & GO:0005524 & GO:0016787	3.6.4.6	Vesicle-fusing ATPase.	SM00382 (SMART);SM01072 (SMART);SM01073 (SMART);PF02359 (PFAM);G3DSA:3.10.330.10 (GENE3D);G3DSA:3.40.50.300 (GENE3D);G3DSA:3.40.50.300 (GENE3D);TIGR01243 (TIGRFAM);G3DSA:1.10.8.60 (GENE3D);PF02933 (PFAM);G3DSA:2.40.40.20 (GENE3D);PF00004 (PFAM);PTHR23077:SF82 (PANTHER);PTHR23077 (PANTHER);PS00674 (PROSITE_PATTERNS);SSF52540 (SUPERFAMILY);SSF52540 (SUPERFAMILY);SSF50692 (SUPERFAMILY);SSF54585 (SUP…	GO:0016787;GO:0005524;GO:0005524	hydrolase activity;ATP binding;ATP binding	Molecular Function;Molecular Function;Molecular Function	MS-DArT_site_6345|MS-DArT_site_6346	0
Eucgr.B00302	Chr02	2900248	2906224	-	PTHR11453//PTHR11453:SF51 - ANION EXCHANGE PROTEIN // SUBFAMILY NOT NAMED (1 of 1) & probable boron transporter 2	GO:0016021, GO:0006820, GO:0016020, GO:0005452 & GO:0015698 & GO:0005887 & GO:0051453 & GO:0098656 & GO:0005452			PF00955 (PFAM);G3DSA:1.10.287.570 (GENE3D);PTHR11453:SF51 (PANTHER);PTHR11453 (PANTHER);TRANSMEMBRANE (PHOBIUS);NON_CYTOPLASMIC_DOMAIN (PHOBIUS);CYTOPLASMIC_DOMAIN (PHOBIUS);TRANSMEMBRANE (PHOBIUS);TRANSMEMBRANE (PHOBIUS);CYTOPLASMIC_DOMAIN (PHOBIUS);TRANSMEMBRANE (PHOBIUS);CYTOPLASMIC_DOMAIN (PHOBIUS);NON_CYTOPLASMIC_DOMAIN (PHOBIUS);TRANSMEMBRANE (PHOBIUS);CYTOPLASMIC_DOMAIN (PHOBIUS);TRANSMEMB…	GO:0006820/GO:0016021;GO:0006820/GO:0016020/GO:0005452	anion transport/integral component of membrane;anion transport/membrane/inorganic anion exchanger activity	Biological Process/Cellular Component;Biological Process/Cellular Component/Molecular Function	MS-DArT_site_6437	0
Eucgr.B00317	Chr02	3083522	3087719	-	K13343 - peroxin-14 (PEX14) (1 of 1) & peroxisomal membrane PEX14	GO:0016560, GO:0005778, GO:0005515 & GO:0005778 & GO:0016021 & GO:0016560			PF04695 (PFAM);PTHR23058 (PANTHER);PTHR23058:SF0 (PANTHER);NON_CYTOPLASMIC_DOMAIN (PHOBIUS);CYTOPLASMIC_DOMAIN (PHOBIUS);TRANSMEMBRANE (PHOBIUS);TMhelix (TMHMM)	GO:0005515/GO:0005778/GO:0016560	protein binding/peroxisomal membrane/protein import into peroxisome matrix, docking	Molecular Function/Cellular Component/Biological Process	MS-DArT_site_6467|MS-DArT_site_6468	0
Eucgr.B00341	Chr02	3310325	3316341	+	K10084 - ER degradation enhancer, mannosidase alpha-like 1 (EDEM1) (1 of 1) & alpha-mannosidase I MNS5	GO:0016020, GO:0005509, GO:0004571 & GO:0030968 & GO:0097466 & GO:0005509 & GO:0006491 & GO:0016020 & GO:0004571 & GO:0005783 & GO:0030433	3.2.1.113 & 3.2.1.24 & 3.2.1	Mannosyl-oligosaccharide 1,2-alpha-mannosidase & Alpha-mannosidase & Glycosylases	PR00747 (PRINTS);PF01532 (PFAM);G3DSA:1.50.10.50 (GENE3D);PTHR11742 (PANTHER);PTHR11742:SF44 (PANTHER);SIGNAL_PEPTIDE_N_REGION (PHOBIUS);NON_CYTOPLASMIC_DOMAIN (PHOBIUS);SIGNAL_PEPTIDE (PHOBIUS);SIGNAL_PEPTIDE_H_REGION (PHOBIUS);SIGNAL_PEPTIDE_C_REGION (PHOBIUS);SignalP-noTM (SIGNALP_EUK);SSF48225 (SUPERFAMILY)	GO:0004571/GO:0005509/GO:0016020;GO:0004571/GO:0005509/GO:0016020;GO:0004571/GO:0005509/GO:0016020;GO:0004571/GO:0005509/GO:0016020	mannosyl-oligosaccharide 1,2-alpha-mannosidase activity/calcium ion binding/membrane;mannosyl-oligosaccharide 1,2-alpha-mannosidase activity/calcium ion binding/membrane;mannosyl-oligosaccharide 1,2-alpha-mannosidase activity/calcium ion binding/membrane;mannosyl-oligosaccharide 1,2-alpha-mannosidase activity/calcium ion binding/membrane	Molecular Function/Molecular Function/Cellular Component;Molecular Function/Molecular Function/Cellular Component;Molecular Function/Molecular Function/Cellular Component;Molecular Function/Molecular Function/Cellular Component	MS-DArT_site_6501	0
Eucgr.B00343	Chr02	3322449	3326054	-	PF04134 - Protein of unknown function, DUF393 (DUF393) (1 of 3), & Thiol-disulfide oxidoreductase DCC isoform 1				PF04134 (PFAM);PTHR34290 (PANTHER);PTHR34290:SF2 (PANTHER);SSF52833 (SUPERFAMILY)				MS-DArT_site_6505	0
Eucgr.B00354	Chr02	3388647	3391978	-	PTHR10788:SF14 - ALPHA,ALPHA-TREHALOSE-PHOSPHATE SYNTHASE [UDP-FORMING] 10-RELATED (1 of 3) & probable alpha,alpha-trehalose-phosphate synthase [UDP-forming] 9	GO:0005992, GO:0003824 & GO:0003825 & GO:0004805 & GO:0005992 & GO:0016311	2.4.1.15, 3.1.3.12 & 2.4.1.15 & 3.1 & 3.1.3.12 & 3.1.3.41 & 2.4.1	Alpha,alpha-trehalose-phosphate synthase (UDP-forming)., Trehalose-phosphatase. & Alpha,alpha-trehalose-phosphate synthase (UDP-forming) & Acting on ester bonds & Trehalose-phosphatase & 4-nitrophenylphosphatase & Glycosyltransferases	TIGR00685 (TIGRFAM);TIGR01484 (TIGRFAM);G3DSA:3.40.50.2000 (GENE3D);G3DSA:3.40.50.1000 (GENE3D);PF02358 (PFAM);PF00982 (PFAM);G3DSA:3.40.50.2000 (GENE3D);PTHR10788 (PANTHER);PTHR10788:SF14 (PANTHER);SIGNAL_PEPTIDE (PHOBIUS);NON_CYTOPLASMIC_DOMAIN (PHOBIUS);SIGNAL_PEPTIDE_C_REGION (PHOBIUS);SIGNAL_PEPTIDE_N_REGION (PHOBIUS);SIGNAL_PEPTIDE_H_REGION (PHOBIUS);SSF53756 (SUPERFAMILY);SSF56784 (SUPERFA…	GO:0005992/GO:0003824;GO:0005992/GO:0003824;GO:0005992/GO:0003824	trehalose biosynthetic process/catalytic activity;trehalose biosynthetic process/catalytic activity;trehalose biosynthetic process/catalytic activity	Biological Process/Molecular Function;Biological Process/Molecular Function;Biological Process/Molecular Function	MS-DArT_site_6527,MS-DArT_site_6526	0,0
Eucgr.B00365	Chr02	3476356	3480167	-	PTHR23257//PTHR23257:SF511 - SERINE-THREONINE PROTEIN KINASE // SUBFAMILY NOT NAMED (1 of 2) & serine threonine- kinase HT1-like	GO:0006468, GO:0005524, GO:0004672 & GO:0005524 & GO:0004672 & GO:0006468	2.7.12.1	Dual-specificity kinase.	PR00109 (PRINTS);SM00220 (SMART);G3DSA:3.30.200.20 (GENE3D);PF07714 (PFAM);G3DSA:1.10.510.10 (GENE3D);PTHR23257 (PANTHER);PTHR23257:SF511 (PANTHER);PS00108 (PROSITE_PATTERNS);PS50011 (PROSITE_PROFILES);SSF56112 (SUPERFAMILY)	GO:0004672/GO:0006468;GO:0006468/GO:0005524/GO:0004672;GO:0004672/GO:0006468;GO:0006468/GO:0004672;GO:0006468/GO:0005524/GO:0004672	protein kinase activity/protein phosphorylation;protein phosphorylation/ATP binding/protein kinase activity;protein kinase activity/protein phosphorylation;protein phosphorylation/protein kinase activity;protein phosphorylation/ATP binding/protein kinase activity	Molecular Function/Biological Process;Biological Process/Molecular Function/Molecular Function;Molecular Function/Biological Process;Biological Process/Molecular Function;Biological Process/Molecular Function/Molecular Function	MS-DArT_site_6543	0
Eucgr.B00367	Chr02	3556604	3558858	-	PF03181 - BURP domain (BURP) (1 of 14) & polygalacturonase 1 beta 3	GO:0016020			SM01045 (SMART);PF03181 (PFAM);PTHR31458 (PANTHER);PTHR31458:SF2 (PANTHER);SIGNAL_PEPTIDE_C_REGION (PHOBIUS);NON_CYTOPLASMIC_DOMAIN (PHOBIUS);SIGNAL_PEPTIDE (PHOBIUS);SIGNAL_PEPTIDE_N_REGION (PHOBIUS);SIGNAL_PEPTIDE_H_REGION (PHOBIUS);PS51277 (PROSITE_PROFILES);SignalP-noTM (SIGNALP_GRAM_NEGATIVE);SignalP-TM (SIGNALP_GRAM_POSITIVE);SignalP-noTM (SIGNALP_EUK)				MS-DArT_site_6550	0
Eucgr.B00368	Chr02	3567099	3571040	+	PTHR23029:SF45 - PHOSPHOGLYCERATE MUTASE FAMILY PROTEIN (1 of 1), & hypothetical protein EUGRSUZ_B00368	GO:0016791 & GO:0005829 & GO:0016311	3.1.3.3, 3.1.3.46 & 3.1 & 3.1.3.41	Phosphoserine phosphatase., Fructose-2,6-bisphosphate 2-phosphatase. & Acting on ester bonds & 4-nitrophenylphosphatase	G3DSA:3.40.50.1240 (GENE3D);PF00300 (PFAM);PTHR23029 (PANTHER);PTHR23029:SF45 (PANTHER);SSF53254 (SUPERFAMILY)				MS-DArT_site_6553	0
Eucgr.B00369	Chr02	3571422	3576069	+	K16284 - E3 ubiquitin-protein ligase SIS3 [EC:6.3.2.19] (SIS3) (1 of 1) & E3 ubiquitin- ligase SIS3 isoform X1	GO:0008270, GO:0005515 & GO:0004842 & GO:0008270 & GO:0010182 & GO:0016021 & GO:0016874 & GO:0016567			SM00184 (SMART);PF13639 (PFAM);G3DSA:3.30.40.10 (GENE3D);PTHR14155 (PANTHER);PTHR14155:SF120 (PANTHER);CYTOPLASMIC_DOMAIN (PHOBIUS);TRANSMEMBRANE (PHOBIUS);CYTOPLASMIC_DOMAIN (PHOBIUS);NON_CYTOPLASMIC_DOMAIN (PHOBIUS);TRANSMEMBRANE (PHOBIUS);CYTOPLASMIC_DOMAIN (PHOBIUS);TRANSMEMBRANE (PHOBIUS);NON_CYTOPLASMIC_DOMAIN (PHOBIUS);TRANSMEMBRANE (PHOBIUS);PS50089 (PROSITE_PROFILES);SSF57850 (SUPERFAMIL…	GO:0005515/GO:0008270;GO:0005515/GO:0008270;GO:0005515/GO:0008270	protein binding/zinc ion binding;protein binding/zinc ion binding;protein binding/zinc ion binding	Molecular Function/Molecular Function;Molecular Function/Molecular Function;Molecular Function/Molecular Function	MS-DArT_site_6556|MS-DArT_site_6557,MS-DArT_site_6555	0,0
Eucgr.B00380	Chr02	3650129	3654860	-	PTHR24351//PTHR24351:SF83 - RIBOSOMAL PROTEIN S6 KINASE // SUBFAMILY NOT NAMED (1 of 1) & serine threonine- kinase 2 19-like	GO:0005634 & GO:0005524 & GO:0005737 & GO:0004674 & GO:0006468 & GO:0035556	2.7.11.1 & 2.7.11	Non-specific serine/threonine protein kinase. & Transferring phosphorus-containing groups	SM00220 (SMART);SM00133 (SMART);G3DSA:1.10.510.10 (GENE3D);G3DSA:3.30.200.20 (GENE3D);PF00433 (PFAM);PF00069 (PFAM);PTHR24351:SF83 (PANTHER);PTHR24351 (PANTHER);PS00107 (PROSITE_PATTERNS);PS00108 (PROSITE_PATTERNS);PS50011 (PROSITE_PROFILES);PS51285 (PROSITE_PROFILES);SignalP-TM (SIGNALP_GRAM_POSITIVE);SSF56112 (SUPERFAMILY)	GO:0005524/GO:0004672/GO:0006468;GO:0006468/GO:0005524/GO:0004674;GO:0005524/GO:0004674/GO:0006468;GO:0005524/GO:0004672/GO:0006468;GO:0005524;GO:0006468/GO:0004672;GO:0005524/GO:0004672/GO:0006468;GO:0006468/GO:0005524/GO:0004674	ATP binding/protein kinase activity/protein phosphorylation;protein phosphorylation/ATP binding/protein serine/threonine kinase activity;ATP binding/protein serine/threonine kinase activity/protein phosphorylation;ATP binding/protein kinase activity/protein phosphorylation;ATP binding;protein phosphorylation/protein kinase activity;ATP binding/protein kinase activity/protein phosphorylation;prote…	Molecular Function/Molecular Function/Biological Process;Biological Process/Molecular Function/Molecular Function;Molecular Function/Molecular Function/Biological Process;Molecular Function/Molecular Function/Biological Process;Molecular Function;Biological Process/Molecular Function;Molecular Function/Molecular Function/Biological Process;Biological Process/Molecular Function/Molecular Function	MS-DArT_site_6587	0
Eucgr.B00382	Chr02	3675547	3679210	+	2.7.1.78 - Polynucleotide 5'-hydroxyl-kinase (1 of 1), & polynucleotide 5 -hydroxyl-kinase NOL9	GO:0005634 & GO:0005524 & GO:0051731 & GO:0000448 & GO:0016310	2.7.1.78 & 2.7.1	Polynucleotide 5'-hydroxyl-kinase. & Transferring phosphorus-containing groups	G3DSA:3.40.50.300 (GENE3D);PF16575 (PFAM);PTHR12755 (PANTHER);SSF52540 (SUPERFAMILY)				MS-DArT_site_6596	0
Eucgr.B00389	Chr02	3698877	3702736	-	tRNA (Ile)-lysidine synthase				Coil (COILS);PTHR36764:SF1 (PANTHER);PTHR36764 (PANTHER)				MS-DArT_site_6605	0
Eucgr.B00393	Chr02	3722245	3725909	-	1.1.99.35 - Soluble quinoprotein glucose dehydrogenase / Soluble glucose dehydrogenase (1 of 1) & HIPL1 -like	GO:0048038, GO:0016901, GO:0005975 & GO:0005975 & GO:0016901 & GO:0048038 & GO:0055114	1.1.99.35, 1.1.5.2	Soluble quinoprotein glucose dehydrogenase., Quinoprotein glucose dehydrogenase (PQQ, quinone).	PF07995 (PFAM);G3DSA:2.120.10.30 (GENE3D);PTHR19328 (PANTHER);PTHR19328:SF34 (PANTHER);SIGNAL_PEPTIDE (PHOBIUS);SIGNAL_PEPTIDE_C_REGION (PHOBIUS);NON_CYTOPLASMIC_DOMAIN (PHOBIUS);TRANSMEMBRANE (PHOBIUS);SIGNAL_PEPTIDE_N_REGION (PHOBIUS);CYTOPLASMIC_DOMAIN (PHOBIUS);SIGNAL_PEPTIDE_H_REGION (PHOBIUS);SignalP-noTM (SIGNALP_EUK);SignalP-noTM (SIGNALP_GRAM_NEGATIVE);SignalP-TM (SIGNALP_GRAM_POSITIVE);…	GO:0016901/GO:0048038/GO:0005975;GO:0003824	oxidoreductase activity, acting on the CH-OH group of donors, quinone or similar compound as acceptor/quinone binding/carbohydrate metabolic process;catalytic activity	Molecular Function/Molecular Function/Biological Process;Molecular Function	MS-DArT_site_6621|MS-DArT_site_6623	0
Eucgr.B00394	Chr02	3727604	3734644	-	PTHR13361:SF1 - WW DOMAIN-BINDING PROTEIN 11 (1 of 1) & formin 5	GO:0006396 & GO:0048573 & GO:0045292 & GO:0005681			Coil (COILS);Coil (COILS);PF12622 (PFAM);PF09429 (PFAM);PTHR13361 (PANTHER);PTHR13361:SF1 (PANTHER)	GO:0006396	RNA processing	Biological Process	MS-DArT_site_6626,MS-DArT_site_6627	0,0
Eucgr.B00398	Chr02	3747489	3756918	-	PTHR22975 - UBIQUITIN SPECIFIC PROTEINASE (1 of 2) & Ubiquitin carboxyl-terminal hydrolase-related isoform 1	GO:0036459, GO:0016579 & GO:0016579 & GO:0046872 & GO:0036459	3.4.19.12 & 3.4	Ubiquitinyl hydrolase 1. & Acting on peptide bonds (peptidases) & Ubiquitinyl hydrolase 1	Coil (COILS);Coil (COILS);Coil (COILS);G3DSA:1.25.40.10 (GENE3D);PF04780 (PFAM);PF04781 (PFAM);PF00443 (PFAM);PTHR22975:SF9 (PANTHER);PTHR22975 (PANTHER);PS00028 (PROSITE_PATTERNS);SIGNAL_PEPTIDE_C_REGION (PHOBIUS);NON_CYTOPLASMIC_DOMAIN (PHOBIUS);SIGNAL_PEPTIDE_H_REGION (PHOBIUS);SIGNAL_PEPTIDE (PHOBIUS);SIGNAL_PEPTIDE_N_REGION (PHOBIUS);PS50235 (PROSITE_PROFILES);SignalP-TM (SIGNALP_GRAM_POSITI…	GO:0005515;GO:0016579/GO:0036459;GO:0046872	protein binding;protein deubiquitination/thiol-dependent ubiquitinyl hydrolase activity;metal ion binding	Molecular Function;Biological Process/Molecular Function;Molecular Function	MS-DArT_site_6642	0
Eucgr.B00470	Chr02	4479164	4482310	-	PTHR23042:SF51 - TRANSCRIPTION FACTOR BHLH47 (1 of 1) & transcription factor bHLH47	GO:0065007 & GO:0016020 & GO:0046983			Coil (COILS);Coil (COILS);Coil (COILS);G3DSA:4.10.280.10 (GENE3D);PTHR23042 (PANTHER);PTHR23042:SF51 (PANTHER);PS50888 (PROSITE_PROFILES);SSF47459 (SUPERFAMILY)	GO:0046983;GO:0046983;GO:0046983	protein dimerization activity;protein dimerization activity;protein dimerization activity	Molecular Function;Molecular Function;Molecular Function	MS-DArT_site_6756	0
Eucgr.B00481	Chr02	4566465	4572059	-	PTHR10108:SF776 - METHYLTRANSFERASE PMT2-RELATED (1 of 2) & probable methyltransferase PMT2	GO:0008168 & GO:0005802 & GO:0005768 & GO:0016021 & GO:0005774 & GO:0008757 & GO:0032259			Coil (COILS);G3DSA:3.40.50.150 (GENE3D);G3DSA:3.40.50.150 (GENE3D);PF03141 (PFAM);PTHR10108 (PANTHER);PTHR10108:SF776 (PANTHER);NON_CYTOPLASMIC_DOMAIN (PHOBIUS);CYTOPLASMIC_DOMAIN (PHOBIUS);TRANSMEMBRANE (PHOBIUS);NON_CYTOPLASMIC_DOMAIN (PHOBIUS);TRANSMEMBRANE (PHOBIUS);SSF53335 (SUPERFAMILY);SSF53335 (SUPERFAMILY);TMhelix (TMHMM);TMhelix (TMHMM)	GO:0008168	methyltransferase activity	Molecular Function	MS-DArT_site_6777,MS-DArT_site_6778	0,0
Eucgr.B00527	Chr02	5436053	5439673	+	KOG3292 - Predicted membrane protein (1 of 3) & uncharacterized endoplasmic reticulum membrane	GO:0016021			PF06127 (PFAM);PTHR28026:SF4 (PANTHER);PTHR28026 (PANTHER);CYTOPLASMIC_DOMAIN (PHOBIUS);NON_CYTOPLASMIC_DOMAIN (PHOBIUS);NON_CYTOPLASMIC_DOMAIN (PHOBIUS);TRANSMEMBRANE (PHOBIUS);TRANSMEMBRANE (PHOBIUS);NON_CYTOPLASMIC_DOMAIN (PHOBIUS);CYTOPLASMIC_DOMAIN (PHOBIUS);TRANSMEMBRANE (PHOBIUS);TRANSMEMBRANE (PHOBIUS);TRANSMEMBRANE (PHOBIUS);CYTOPLASMIC_DOMAIN (PHOBIUS);TMhelix (TMHMM);TMhelix (TMHMM);TM…				MS-DArT_site_6921	0
Eucgr.B00544	Chr02	5601699	5607791	-	PTHR24343:SF15 - 5'-AMP-ACTIVATED PROTEIN KINASE CATALYTIC SUBUNIT ALPHA-2 (1 of 2) & SNF1-related kinase catalytic subunit alpha KIN10	GO:0009594 & GO:0010260 & GO:0080022 & GO:0010050 & GO:0010182 & GO:0004674 & GO:0006468 & GO:0005524 & GO:0003006 & GO:0009738 & GO:0000152 & GO:0005515 & GO:0005737 & GO:0035556	2.7.11.1 & 2.7.11	Non-specific serine/threonine protein kinase. & Transferring phosphorus-containing groups	SM00220 (SMART);G3DSA:3.30.200.20 (GENE3D);G3DSA:1.10.8.10 (GENE3D);G3DSA:1.10.510.10 (GENE3D);PF00069 (PFAM);PF02149 (PFAM);PTHR24343:SF15 (PANTHER);PTHR24343 (PANTHER);PS00107 (PROSITE_PATTERNS);PS00108 (PROSITE_PATTERNS);PS50032 (PROSITE_PROFILES);PS50030 (PROSITE_PROFILES);PS50011 (PROSITE_PROFILES);SSF56112 (SUPERFAMILY);SSF103243 (SUPERFAMILY)	GO:0005524/GO:0006468/GO:0004672;GO:0005524/GO:0006468/GO:0004672;GO:0005524;GO:0004672/GO:0006468;GO:0005524/GO:0006468/GO:0004672	ATP binding/protein phosphorylation/protein kinase activity;ATP binding/protein phosphorylation/protein kinase activity;ATP binding;protein kinase activity/protein phosphorylation;ATP binding/protein phosphorylation/protein kinase activity	Molecular Function/Biological Process/Molecular Function;Molecular Function/Biological Process/Molecular Function;Molecular Function;Molecular Function/Biological Process;Molecular Function/Biological Process/Molecular Function	MS-DArT_site_6946|MS-DArT_site_6947	0
Eucgr.B00560	Chr02	5755496	5757773	+	PF01535//PF13041//PF14432 - PPR repeat (PPR) // PPR repeat family (PPR_2) // DYW family of nucleic acid deaminases (DYW_deaminase) (1 of 78) & pentatricopeptide repeat-containing chloroplastic-like	GO:0008270			PF01535 (PFAM);TIGR00756 (TIGRFAM);G3DSA:1.25.40.10 (GENE3D);PF13041 (PFAM);PF14432 (PFAM);PTHR24015 (PANTHER);PS51375 (PROSITE_PROFILES)	GO:0005515;GO:0008270	protein binding;zinc ion binding	Molecular Function;Molecular Function	MS-DArT_site_6973	0
Eucgr.B00561	Chr02	5757875	5758850	-	PTHR11783:SF74 - CYTOSOLIC SULFOTRANSFERASE 1-RELATED (1 of 16) & cytosolic sulfotransferase 5-like	GO:0008146			G3DSA:3.40.50.300 (GENE3D);PF00685 (PFAM);PTHR11783 (PANTHER);PTHR11783:SF74 (PANTHER);SSF52540 (SUPERFAMILY)	GO:0008146	sulfotransferase activity	Molecular Function	MS-DArT_site_6975	0
Eucgr.B00566	Chr02	5805976	5813346	-	PTHR31434:SF2 - S PHASE CYCLIN A-ASSOCIATED PROTEIN IN THE ENDOPLASMIC RETICULUM (1 of 1) & S phase cyclin A-associated in the endoplasmic reticulum				Coil (COILS);Coil (COILS);Coil (COILS);PF16501 (PFAM);PTHR31434 (PANTHER);PTHR31434:SF2 (PANTHER)				MS-DArT_site_6985,MS-DArT_site_6988|MS-DArT_site_6989,MS-DArT_site_6987	0,0,0
Eucgr.B00575	Chr02	5872988	5880370	-	PTHR11255:SF54 - DIACYLGLYCEROL KINASE 1 (1 of 2) & diacylglycerol kinase 1	GO:0035556, GO:0016301, GO:0007205, GO:0004143 & GO:0005524 & GO:0016021 & GO:0004143 & GO:0016310 & GO:0007205 & GO:0005622 & GO:0035556	2.7.1.107	Diacylglycerol kinase. & Diacylglycerol kinase (ATP)	SM00046 (SMART);SM00045 (SMART);SM00109 (SMART);G3DSA:3.30.60.20 (GENE3D);PF00130 (PFAM);PF00609 (PFAM);PF00781 (PFAM);PTHR11255 (PANTHER);PTHR11255:SF54 (PANTHER);CYTOPLASMIC_DOMAIN (PHOBIUS);NON_CYTOPLASMIC_DOMAIN (PHOBIUS);TRANSMEMBRANE (PHOBIUS);PS50081 (PROSITE_PROFILES);PS50146 (PROSITE_PROFILES);SSF111331 (SUPERFAMILY);SSF57889 (SUPERFAMILY);TMhelix (TMHMM)	GO:0016301;GO:0004143/GO:0007205;GO:0035556;GO:0035556;GO:0004143/GO:0007205;GO:0016301;GO:0035556;GO:0016301	kinase activity;diacylglycerol kinase activity/protein kinase C-activating G-protein coupled receptor signaling pathway;intracellular signal transduction;intracellular signal transduction;diacylglycerol kinase activity/protein kinase C-activating G-protein coupled receptor signaling pathway;kinase activity;intracellular signal transduction;kinase activity	Molecular Function;Molecular Function/Biological Process;Biological Process;Biological Process;Molecular Function/Biological Process;Molecular Function;Biological Process;Molecular Function	MS-DArT_site_7013,MS-DArT_site_7009|MS-DArT_site_7010,MS-DArT_site_7011|MS-DArT_site_7012	0,0,0
Eucgr.B00583	Chr02	5946009	5971966	-	K18663 - activating signal cointegrator complex subunit 3 [EC:3.6.4.12] (ASCC3) (1 of 1) & D -box ATP-dependent RNA helicase D 14	GO:0005524, GO:0003676, GO:0031204, GO:0008565 & GO:0003676 & GO:0005524 & GO:0030529 & GO:0019013 & GO:0004386	3.6.4.12 & 3.6.1 & 3.6.1.15	DNA helicase. & Acting on acid anhydrides & Nucleoside-triphosphate phosphatase	Coil (COILS);SM00973 (SMART);SM00382 (SMART);SM00490 (SMART);SM00487 (SMART);PIRSF039073 (PIRSF);G3DSA:3.40.50.300 (GENE3D);G3DSA:3.40.50.300 (GENE3D);G3DSA:2.60.40.150 (GENE3D);G3DSA:1.10.3380.10 (GENE3D);PF00270 (PFAM);G3DSA:3.40.50.300 (GENE3D);PF00271 (PFAM);PF02889 (PFAM);PTHR24075 (PANTHER);PTHR24075:SF0 (PANTHER);PS51194 (PROSITE_PROFILES);PS51192 (PROSITE_PROFILES);SSF52540 (SUPERFAMILY);…	GO:0005515;GO:0005524/GO:0003676	protein binding;ATP binding/nucleic acid binding	Molecular Function;Molecular Function/Molecular Function	MS-DArT_site_7021	0
Eucgr.B00588	Chr02	6009541	6013045	-	PTHR24089:SF370 - MITOCHONDRIAL SUBSTRATE CARRIER FAMILY PROTEIN (1 of 1) & mitochondrial substrate carrier family E isoform X1	GO:0055085 & GO:0016021			PF00153 (PFAM);G3DSA:1.50.40.10 (GENE3D);PTHR24089 (PANTHER);PTHR24089:SF370 (PANTHER);PS50920 (PROSITE_PROFILES);SSF103506 (SUPERFAMILY)				MS-DArT_site_7038	0
Eucgr.B00609	Chr02	6176646	6182493	-	PF14309//PF14383 - Domain of unknown function (DUF4378) (DUF4378) // DUF761-associated sequence motif (VARLMGL) (1 of 7) & LONGIFOLIA 1	GO:0051513			Coil (COILS);PF14383 (PFAM);PF14309 (PFAM);PTHR31680 (PANTHER);PTHR31680:SF3 (PANTHER)	GO:0051513	regulation of monopolar cell growth	Biological Process	MS-DArT_site_7073	0
Eucgr.B00614	Chr02	6224682	6232718	-	PF01805 - Surp module (Surp) (1 of 8), & serine arginine repetitive matrix 2-like	GO:0006396, GO:0003723 & GO:0003723 & GO:0046872 & GO:0006396			SM00648 (SMART);SM00356 (SMART);PF01805 (PFAM);PTHR36886 (PANTHER);PTHR36886:SF2 (PANTHER);PS50103 (PROSITE_PROFILES);PS50128 (PROSITE_PROFILES);SSF109905 (SUPERFAMILY)	GO:0006396/GO:0003723;GO:0046872;GO:0006396/GO:0003723;GO:0046872;GO:0006396/GO:0003723;GO:0006396/GO:0003723	RNA processing/RNA binding;metal ion binding;RNA processing/RNA binding;metal ion binding;RNA processing/RNA binding;RNA processing/RNA binding	Biological Process/Molecular Function;Molecular Function;Biological Process/Molecular Function;Molecular Function;Biological Process/Molecular Function;Biological Process/Molecular Function	MS-DArT_site_7084,MS-DArT_site_7087|MS-DArT_site_7088,MS-DArT_site_7086	0,0,0
Eucgr.B00616	Chr02	6240791	6249464	-	PF13415//PF13418 - Galactose oxidase, central domain (Kelch_3) // Galactose oxidase, central domain (Kelch_4) (1 of 3) & kelch domain-containing 3 isoform X1				PF13418 (PFAM);G3DSA:2.120.10.80 (GENE3D);PF13415 (PFAM);PTHR23244 (PANTHER);TRANSMEMBRANE (PHOBIUS);NON_CYTOPLASMIC_DOMAIN (PHOBIUS);CYTOPLASMIC_DOMAIN (PHOBIUS);SSF50965 (SUPERFAMILY);TMhelix (TMHMM)	GO:0005515	protein binding	Molecular Function	MS-DArT_site_7091	0
Eucgr.B00628	Chr02	6559855	6562698	+	PF04833 - COBRA-like protein (COBRA) (1 of 14) & COBRA-like	GO:0031225, GO:0016049, GO:0010215 & GO:0009825 & GO:0009651 & GO:0009930 & GO:0016021 & GO:0010215 & GO:0009505 & GO:0046658			PF04833 (PFAM);PIRSF038122 (PIRSF);PTHR31673 (PANTHER);TRANSMEMBRANE (PHOBIUS);SIGNAL_PEPTIDE_N_REGION (PHOBIUS);SIGNAL_PEPTIDE (PHOBIUS);CYTOPLASMIC_DOMAIN (PHOBIUS);SIGNAL_PEPTIDE_H_REGION (PHOBIUS);NON_CYTOPLASMIC_DOMAIN (PHOBIUS);SIGNAL_PEPTIDE_C_REGION (PHOBIUS);PD140986 (PRODOM)	GO:0031225/GO:0016049/GO:0010215;GO:0031225/GO:0016049/GO:0010215;GO:0031225/GO:0016049/GO:0010215	anchored component of membrane/cell growth/cellulose microfibril organization;anchored component of membrane/cell growth/cellulose microfibril organization;anchored component of membrane/cell growth/cellulose microfibril organization	Cellular Component/Biological Process/Biological Process;Cellular Component/Biological Process/Biological Process;Cellular Component/Biological Process/Biological Process	MS-DArT_site_7140	0
Eucgr.B00644	Chr02	6738112	6741994	+	PF10250 - GDP-fucose protein O-fucosyltransferase (O-FucT) (1 of 41) & O-fucosyltransferase family isoform 2	GO:0016757 & GO:0005737 & GO:0016021			PIRSF009360 (PIRSF);PF10250 (PFAM);PTHR31741 (PANTHER);PTHR31741:SF5 (PANTHER);NON_CYTOPLASMIC_DOMAIN (PHOBIUS);SIGNAL_PEPTIDE_H_REGION (PHOBIUS);SIGNAL_PEPTIDE_N_REGION (PHOBIUS);SIGNAL_PEPTIDE_C_REGION (PHOBIUS);SIGNAL_PEPTIDE (PHOBIUS)				MS-DArT_site_7174,MS-DArT_site_7175	0,0
Eucgr.B00646	Chr02	6765636	6768745	-	PF13639 - Ring finger domain (zf-RING_2) (1 of 200) & PHD and RING finger domain-containing 1	GO:0008270, GO:0005515 & GO:0008270			Coil (COILS);SM00249 (SMART);SM00184 (SMART);G3DSA:3.30.40.10 (GENE3D);PF13639 (PFAM);G3DSA:3.30.40.10 (GENE3D);PS00518 (PROSITE_PATTERNS);PS50016 (PROSITE_PROFILES);PS50089 (PROSITE_PROFILES);SSF57850 (SUPERFAMILY);SSF57903 (SUPERFAMILY)	GO:0008270/GO:0005515;GO:0005515/GO:0008270;GO:0005515/GO:0008270;GO:0005515;GO:0005515/GO:0008270	zinc ion binding/protein binding;protein binding/zinc ion binding;protein binding/zinc ion binding;protein binding;protein binding/zinc ion binding	Molecular Function/Molecular Function;Molecular Function/Molecular Function;Molecular Function/Molecular Function;Molecular Function;Molecular Function/Molecular Function	MS-DArT_site_7185|MS-DArT_site_7186	0
Eucgr.B00657	Chr02	6902789	6904134	+	PTHR22763//PTHR22763:SF8 - RING ZINC FINGER PROTEIN // SUBFAMILY NOT NAMED (1 of 3) & Zinc finger isoform 1	GO:0008270, GO:0005515 & GO:0008270 & GO:0044267	6.3.2.19	Ubiquitin--protein ligase.	SM00184 (SMART);G3DSA:3.30.40.10 (GENE3D);PF13639 (PFAM);PTHR22763 (PANTHER);PTHR22763:SF8 (PANTHER);PS50089 (PROSITE_PROFILES);SSF57850 (SUPERFAMILY)	GO:0008270/GO:0005515;GO:0008270/GO:0005515;GO:0008270/GO:0005515	zinc ion binding/protein binding;zinc ion binding/protein binding;zinc ion binding/protein binding	Molecular Function/Molecular Function;Molecular Function/Molecular Function;Molecular Function/Molecular Function	MS-DArT_site_7207	0
Eucgr.B00660	Chr02	6932022	6939867	+	PTHR10285:SF76 - URIDINE KINASE (1 of 2) & uridine-cytidine kinase C-like	GO:0016301, GO:0008152, GO:0005524 & GO:0005524 & GO:0006206 & GO:0009737 & GO:0043097 & GO:0004849 & GO:0016021 & GO:0006222 & GO:0005829 & GO:0016310	2.7.1.48	Uridine kinase. & Uridine kinase	Coil (COILS);PR00988 (PRINTS);PF01928 (PFAM);PF00485 (PFAM);G3DSA:3.40.50.300 (GENE3D);G3DSA:2.40.320.10 (GENE3D);PTHR10285:SF76 (PANTHER);PTHR10285 (PANTHER);TRANSMEMBRANE (PHOBIUS);CYTOPLASMIC_DOMAIN (PHOBIUS);NON_CYTOPLASMIC_DOMAIN (PHOBIUS);PS51707 (PROSITE_PROFILES);SSF52540 (SUPERFAMILY);SSF55154 (SUPERFAMILY);TMhelix (TMHMM)	GO:0008152/GO:0005524/GO:0016301	metabolic process/ATP binding/kinase activity	Biological Process/Molecular Function/Molecular Function	MS-DArT_site_7216,MS-DArT_site_7214	0,0
Eucgr.B00672	Chr02	7023010	7026232	-	K03111 - single-strand DNA-binding protein (ssb) (1 of 1) & single-stranded DNA-binding mitochondrial	GO:0003697, GO:0006260 & GO:0006260 & GO:0005739 & GO:0003697			G3DSA:2.40.50.140 (GENE3D);PF00436 (PFAM);PTHR10302 (PANTHER);PTHR10302:SF3 (PANTHER);SIGNAL_PEPTIDE_C_REGION (PHOBIUS);SIGNAL_PEPTIDE_N_REGION (PHOBIUS);NON_CYTOPLASMIC_DOMAIN (PHOBIUS);SIGNAL_PEPTIDE (PHOBIUS);SIGNAL_PEPTIDE_H_REGION (PHOBIUS);PS50935 (PROSITE_PROFILES);SignalP-TM (SIGNALP_GRAM_POSITIVE);SSF50249 (SUPERFAMILY)	GO:0003697;GO:0006260/GO:0003697;GO:0003697	single-stranded DNA binding;DNA replication/single-stranded DNA binding;single-stranded DNA binding	Molecular Function;Biological Process/Molecular Function;Molecular Function	MS-DArT_site_7240	0
Eucgr.B00689	Chr02	7204852	7207897	+	PTHR23272:SF21 - BED ZINC FINGER AND HAT DIMERIZATION DOMAIN-CONTAINING PROTEIN (1 of 1) & zinc finger BED domain-containing DAYSLEEPER isoform X1	GO:0003677, GO:0046983 & GO:0005634 & GO:0003700 & GO:0000977 & GO:0046983 & GO:0006950 & GO:0006357			Coil (COILS);SM00614 (SMART);PF02892 (PFAM);PF05699 (PFAM);PF14372 (PFAM);PTHR23272 (PANTHER);PTHR23272:SF21 (PANTHER);SSF53098 (SUPERFAMILY)	GO:0003677;GO:0003677;GO:0046983;GO:0003677;GO:0003676	DNA binding;DNA binding;protein dimerization activity;DNA binding;nucleic acid binding	Molecular Function;Molecular Function;Molecular Function;Molecular Function;Molecular Function	MS-DArT_site_7266	0
Eucgr.B00701	Chr02	7286699	7292350	+	PTHR13677:SF0 - PROTEIN F53H1.3, ISOFORM A (1 of 1), & DENND6A	GO:0055037 & GO:0017112 & GO:0043547			PF08616 (PFAM);PTHR13677 (PANTHER);PTHR13677:SF0 (PANTHER)				MS-DArT_site_7282	0
Eucgr.B00702	Chr02	7295392	7305241	-	PTHR10625:SF120 - HISTONE DEACETYLASE 15 (1 of 1), & histone deacetylase 15 isoform X1	GO:0009294 & GO:0008270 & GO:0016787	3.5.1.98	Histone deacetylase.	PR01270 (PRINTS);PF00850 (PFAM);G3DSA:3.40.800.20 (GENE3D);PTHR10625:SF120 (PANTHER);PTHR10625 (PANTHER);PS01358 (PROSITE_PATTERNS);SSF52768 (SUPERFAMILY)	GO:0008270	zinc ion binding	Molecular Function	MS-DArT_site_7283|MS-DArT_site_7284	0
Eucgr.B00704	Chr02	7318317	7329128	-	K11340 - actin-like protein 6A (ACTL6A, INO80K) (1 of 1) & actin-related 4	GO:0006281 & GO:0006338 & GO:0035267 & GO:0006355 & GO:0031011			SM00268 (SMART);G3DSA:3.30.420.40 (GENE3D);G3DSA:3.30.420.40 (GENE3D);G3DSA:3.90.640.10 (GENE3D);PF00022 (PFAM);PTHR11937:SF235 (PANTHER);PTHR11937 (PANTHER);SSF53067 (SUPERFAMILY);SSF53067 (SUPERFAMILY)	GO:0006355/GO:0006338/GO:0006281/GO:0035267/GO:0031011	regulation of transcription, DNA-templated/chromatin remodeling/DNA repair/NuA4 histone acetyltransferase complex/Ino80 complex	Biological Process/Biological Process/Biological Process/Cellular Component/Cellular Component	MS-DArT_site_7287,MS-DArT_site_7289,MS-DArT_site_7288	0,0,0
Eucgr.B00707	Chr02	7364807	7373987	-	K09313 - homeobox protein cut-like (CUTL) (1 of 1), & CASP isoform X1	GO:0030173, GO:0006891 & GO:0005802 & GO:0005768 & GO:0030173 & GO:0006891			Coil (COILS);Coil (COILS);Coil (COILS);Coil (COILS);Coil (COILS);Coil (COILS);PF08172 (PFAM);PTHR14043 (PANTHER);TRANSMEMBRANE (PHOBIUS);CYTOPLASMIC_DOMAIN (PHOBIUS);NON_CYTOPLASMIC_DOMAIN (PHOBIUS);TMhelix (TMHMM)	GO:0006891/GO:0030173	intra-Golgi vesicle-mediated transport/integral component of Golgi membrane	Biological Process/Cellular Component	MS-DArT_site_7296	0
Eucgr.B00717	Chr02	7491597	7497633	-	PTHR31086:SF20 - ALUMINUM-ACTIVATED MALATE TRANSPORTER 4-RELATED (1 of 2), & aluminum-activated malate transporter 9	GO:0015743 & GO:0009705 & GO:0016021 & GO:0015140 & GO:0071423			PF11744 (PFAM);PTHR31086 (PANTHER);PTHR31086:SF20 (PANTHER);CYTOPLASMIC_DOMAIN (PHOBIUS);NON_CYTOPLASMIC_DOMAIN (PHOBIUS);TRANSMEMBRANE (PHOBIUS);TRANSMEMBRANE (PHOBIUS);TRANSMEMBRANE (PHOBIUS);NON_CYTOPLASMIC_DOMAIN (PHOBIUS);NON_CYTOPLASMIC_DOMAIN (PHOBIUS);CYTOPLASMIC_DOMAIN (PHOBIUS);TRANSMEMBRANE (PHOBIUS);TRANSMEMBRANE (PHOBIUS);TRANSMEMBRANE (PHOBIUS);CYTOPLASMIC_DOMAIN (PHOBIUS);CYTOPLASM…	GO:0015743	malate transport	Biological Process	MS-DArT_site_7323	0
Eucgr.B00736	Chr02	7757912	7765057	+	K11866 - STAM-binding protein (STAMBP, AMSH) (1 of 3) & AMSH-like ubiquitin thioesterase 1	GO:0005515	3.4.25.1, 3.4.19.12	Proteasome endopeptidase complex., Ubiquitinyl hydrolase 1.	SM00232 (SMART);PF01398 (PFAM);G3DSA:3.40.140.10 (GENE3D);PF08969 (PFAM);PTHR12947:SF10 (PANTHER);PTHR12947 (PANTHER);SSF140856 (SUPERFAMILY);SSF102712 (SUPERFAMILY)	GO:0005515;GO:0005515	protein binding;protein binding	Molecular Function;Molecular Function	MS-DArT_site_7364	0
Eucgr.B00741	Chr02	7787199	7796332	-	PTHR21319:SF0 - RING FINGER AND CHY ZINC FINGER DOMAIN-CONTAINING PROTEIN 1 (1 of 1) & Uncharacterized RING finger	GO:0008270, GO:0005515 & GO:0008270	6.3.2.19	Ubiquitin--protein ligase.	SM00184 (SMART);PF13639 (PFAM);PF01814 (PFAM);G3DSA:3.30.40.10 (GENE3D);PF14599 (PFAM);G3DSA:1.20.120.520 (GENE3D);PF05495 (PFAM);G3DSA:2.20.28.10 (GENE3D);PTHR21319 (PANTHER);PTHR21319:SF0 (PANTHER);PS51270 (PROSITE_PROFILES);PS51266 (PROSITE_PROFILES);PS50089 (PROSITE_PROFILES);SSF57850 (SUPERFAMILY);SSF161245 (SUPERFAMILY);SSF161219 (SUPERFAMILY)	GO:0008270/GO:0005515;GO:0008270/GO:0005515;GO:0008270;GO:0008270;GO:0008270/GO:0005515	zinc ion binding/protein binding;zinc ion binding/protein binding;zinc ion binding;zinc ion binding;zinc ion binding/protein binding	Molecular Function/Molecular Function;Molecular Function/Molecular Function;Molecular Function;Molecular Function;Molecular Function/Molecular Function	MS-DArT_site_7368,MS-DArT_site_7369	0,0
Eucgr.B00853	Chr02	8917844	8920908	-	K12861 - pre-mRNA-splicing factor SPF27 (BCAS2) (1 of 1) & pre-mRNA-splicing factor SPF27 homolog	GO:0006397 & GO:0071013 & GO:0009870 & GO:0071011 & GO:0071012 & GO:0010204 & GO:0000974 & GO:0005730 & GO:0050832 & GO:0042742 & GO:0000398			Coil (COILS);Coil (COILS);Coil (COILS);PF05700 (PFAM);PTHR13296:SF0 (PANTHER);PTHR13296 (PANTHER);SIGNAL_PEPTIDE_H_REGION (PHOBIUS);SIGNAL_PEPTIDE (PHOBIUS);NON_CYTOPLASMIC_DOMAIN (PHOBIUS);SIGNAL_PEPTIDE_N_REGION (PHOBIUS);SIGNAL_PEPTIDE_C_REGION (PHOBIUS)	GO:0006397;GO:0006397	mRNA processing;mRNA processing	Biological Process;Biological Process	MS-DArT_site_7473	0
Eucgr.B00855	Chr02	8922644	8927575	-	K13336 - peroxin-3 (PEX3) (1 of 1) & peroxisome biogenesis 3-2	GO:0007031, GO:0005779 & GO:0005779 & GO:0007031			PF04882 (PFAM);PTHR28080 (PANTHER);PTHR28080:SF1 (PANTHER);CYTOPLASMIC_DOMAIN (PHOBIUS);NON_CYTOPLASMIC_DOMAIN (PHOBIUS);TRANSMEMBRANE (PHOBIUS);CYTOPLASMIC_DOMAIN (PHOBIUS);TRANSMEMBRANE (PHOBIUS);TMhelix (TMHMM)	GO:0007031/GO:0005779	peroxisome organization/integral component of peroxisomal membrane	Biological Process/Cellular Component	MS-DArT_site_7476	0
Eucgr.B00871	Chr02	9277580	9283761	-	PTHR24055//PTHR24055:SF201 - MITOGEN-ACTIVATED PROTEIN KINASE // SUBFAMILY NOT NAMED (1 of 1), & mitogen-activated kinase 9	GO:0016773, GO:0016020, GO:0005524 & GO:0005524 & GO:0000165 & GO:0004707 & GO:0005622	2.7.11.24 & 2.7.11	Mitogen-activated protein kinase. & Transferring phosphorus-containing groups & Mitogen-activated protein kinase	SM00220 (SMART);G3DSA:3.30.200.20 (GENE3D);PF00069 (PFAM);G3DSA:1.10.510.10 (GENE3D);PTHR24055 (PANTHER);PTHR24055:SF201 (PANTHER);PS01351 (PROSITE_PATTERNS);PS00107 (PROSITE_PATTERNS);PS50011 (PROSITE_PROFILES);SSF56112 (SUPERFAMILY)	GO:0005524/GO:0006468/GO:0004672;GO:0005524/GO:0006468/GO:0004672;GO:0006468/GO:0005524/GO:0004707;GO:0005524;GO:0005524/GO:0006468/GO:0004672	ATP binding/protein phosphorylation/protein kinase activity;ATP binding/protein phosphorylation/protein kinase activity;protein phosphorylation/ATP binding/MAP kinase activity;ATP binding;ATP binding/protein phosphorylation/protein kinase activity	Molecular Function/Biological Process/Molecular Function;Molecular Function/Biological Process/Molecular Function;Biological Process/Molecular Function/Molecular Function;Molecular Function;Molecular Function/Biological Process/Molecular Function	MS-DArT_site_7515,MS-DArT_site_7514	0,0
Eucgr.B00874	Chr02	9301737	9312151	+	PTHR23257:SF466 - MAPKKK-LIKE KINASE-RELATED (1 of 1), & serine threonine- kinase EDR1-like isoform X1	GO:0005524 & GO:0004674 & GO:0006468	2.7.11.1 & 2.7.11	Non-specific serine/threonine protein kinase. & Transferring phosphorus-containing groups	PR00109 (PRINTS);SM00220 (SMART);G3DSA:3.30.200.20 (GENE3D);PF07714 (PFAM);G3DSA:1.10.510.10 (GENE3D);PF14381 (PFAM);PTHR23257 (PANTHER);PTHR23257 (PANTHER);PTHR23257:SF466 (PANTHER);PS00108 (PROSITE_PATTERNS);PS00107 (PROSITE_PATTERNS);NON_CYTOPLASMIC_DOMAIN (PHOBIUS);NON_CYTOPLASMIC_DOMAIN (PHOBIUS);TRANSMEMBRANE (PHOBIUS);TRANSMEMBRANE (PHOBIUS);CYTOPLASMIC_DOMAIN (PHOBIUS);PS50011 (PROSITE_PR…	GO:0004672/GO:0006468;GO:0006468/GO:0004672/GO:0005524;GO:0004672/GO:0006468;GO:0006468/GO:0004672;GO:0005524;GO:0006468/GO:0004672/GO:0005524	protein kinase activity/protein phosphorylation;protein phosphorylation/protein kinase activity/ATP binding;protein kinase activity/protein phosphorylation;protein phosphorylation/protein kinase activity;ATP binding;protein phosphorylation/protein kinase activity/ATP binding	Molecular Function/Biological Process;Biological Process/Molecular Function/Molecular Function;Molecular Function/Biological Process;Biological Process/Molecular Function;Molecular Function;Biological Process/Molecular Function/Molecular Function	MS-DArT_site_7517,MS-DArT_site_7520	0,0
Eucgr.B00894	Chr02	11803636	11810654	+	PF07714//PF11721 - Protein tyrosine kinase (Pkinase_Tyr) // Di-glucose binding within endoplasmic reticulum (Malectin) (1 of 55) & probable LRR receptor-like serine threonine- kinase At1g53430	GO:0006468, GO:0004672 & GO:0005524 & GO:0016021 & GO:0004672 & GO:0006468	2.7.11.1	Non-specific serine/threonine protein kinase.	SM00220 (SMART);PF07714 (PFAM);G3DSA:3.30.200.20 (GENE3D);G3DSA:1.10.510.10 (GENE3D);G3DSA:3.80.10.10 (GENE3D);G3DSA:2.60.120.200 (GENE3D);PF11721 (PFAM);PTHR27006 (PANTHER);PTHR27006:SF35 (PANTHER);PS00108 (PROSITE_PATTERNS);NON_CYTOPLASMIC_DOMAIN (PHOBIUS);TRANSMEMBRANE (PHOBIUS);CYTOPLASMIC_DOMAIN (PHOBIUS);PS50011 (PROSITE_PROFILES);SSF56112 (SUPERFAMILY);SSF52058 (SUPERFAMILY);TMhelix (TMHMM…	GO:0004672/GO:0006468/GO:0005524;GO:0004672/GO:0006468;GO:0004672/GO:0006468;GO:0004672/GO:0006468/GO:0005524	protein kinase activity/protein phosphorylation/ATP binding;protein kinase activity/protein phosphorylation;protein kinase activity/protein phosphorylation;protein kinase activity/protein phosphorylation/ATP binding	Molecular Function/Biological Process/Molecular Function;Molecular Function/Biological Process;Molecular Function/Biological Process;Molecular Function/Biological Process/Molecular Function	MS-DArT_site_7652	0
Eucgr.B00991	Chr02	13768501	13785443	+	PTHR22981:SF27 - KETOSE-BISPHOSPHATE ALDOLASE CLASS-II FAMILY PROTEIN (1 of 2) & Ketose-bisphosphate aldolase class-II family isoform 1	GO:0051287, GO:0055114, GO:0004616, GO:0016832, GO:0008270, GO:0005975 & GO:0016832 & GO:0005975 & GO:0008270 & GO:0004616 & GO:0051287 & GO:0055114	4.1.2.13 & 1.1.1.44	Fructose-bisphosphate aldolase. & Phosphogluconate dehydrogenase (NADP(+)-dependent, decarboxylating)	TIGR00167 (TIGRFAM);G3DSA:1.10.1040.10 (GENE3D);G3DSA:3.20.20.70 (GENE3D);G3DSA:3.40.50.720 (GENE3D);PF01116 (PFAM);PF17042 (PFAM);PF03446 (PFAM);PF07005 (PFAM);PF14833 (PFAM);PTHR22981:SF27 (PANTHER);PTHR22981 (PANTHER);PS00895 (PROSITE_PATTERNS);SSF142764 (SUPERFAMILY);SSF48179 (SUPERFAMILY);SSF51735 (SUPERFAMILY);SSF51735 (SUPERFAMILY);SSF51569 (SUPERFAMILY);SSF48179 (SUPERFAMILY)	GO:0016832/GO:0005975/GO:0008270;GO:0055114/GO:0016491;GO:0003824;GO:0016832/GO:0005975/GO:0008270;GO:0004616/GO:0055114;GO:0051287;GO:0055114/GO:0016491;GO:0055114;GO:0055114	aldehyde-lyase activity/carbohydrate metabolic process/zinc ion binding;oxidation-reduction process/oxidoreductase activity;catalytic activity;aldehyde-lyase activity/carbohydrate metabolic process/zinc ion binding;phosphogluconate dehydrogenase (decarboxylating) activity/oxidation-reduction process;NAD binding;oxidation-reduction process/oxidoreductase activity;oxidation-reduction process;oxidat…	Molecular Function/Biological Process/Molecular Function;Biological Process/Molecular Function;Molecular Function;Molecular Function/Biological Process/Molecular Function;Molecular Function/Biological Process;Molecular Function;Biological Process/Molecular Function;Biological Process;Biological Process	MS-DArT_site_7805	0
Eucgr.B00999	Chr02	13882513	13887739	-	PTHR23111//PTHR23111:SF40 - ZINC FINGER PROTEIN // SUBFAMILY NOT NAMED (1 of 1) & zinc finger chloroplastic	GO:0008270			SM00547 (SMART);G3DSA:4.10.1060.10 (GENE3D);PF00641 (PFAM);PTHR23111:SF40 (PANTHER);PTHR23111 (PANTHER);PS01358 (PROSITE_PATTERNS);SIGNAL_PEPTIDE_C_REGION (PHOBIUS);SIGNAL_PEPTIDE_H_REGION (PHOBIUS);NON_CYTOPLASMIC_DOMAIN (PHOBIUS);SIGNAL_PEPTIDE_N_REGION (PHOBIUS);SIGNAL_PEPTIDE (PHOBIUS);PS50199 (PROSITE_PROFILES);SSF90209 (SUPERFAMILY);SSF90209 (SUPERFAMILY);SSF90209 (SUPERFAMILY);SSF90209 (SU…	GO:0008270;GO:0008270;GO:0008270;GO:0008270;GO:0008270;GO:0008270;GO:0008270;GO:0008270;GO:0008270	zinc ion binding;zinc ion binding;zinc ion binding;zinc ion binding;zinc ion binding;zinc ion binding;zinc ion binding;zinc ion binding;zinc ion binding	Molecular Function;Molecular Function;Molecular Function;Molecular Function;Molecular Function;Molecular Function;Molecular Function;Molecular Function;Molecular Function	MS-DArT_site_7819	0
Eucgr.B01001	Chr02	13956876	13960235	+	PTHR22811:SF31 - RE49489P (1 of 1) & transmembrane emp24 domain-containing p24beta3	GO:0016021, GO:0006810 & GO:0005789 & GO:0016021 & GO:0005794 & GO:0005773 & GO:0006810			SM01190 (SMART);PF01105 (PFAM);PTHR22811:SF31 (PANTHER);PTHR22811 (PANTHER);SIGNAL_PEPTIDE_H_REGION (PHOBIUS);NON_CYTOPLASMIC_DOMAIN (PHOBIUS);SIGNAL_PEPTIDE_N_REGION (PHOBIUS);SIGNAL_PEPTIDE_C_REGION (PHOBIUS);CYTOPLASMIC_DOMAIN (PHOBIUS);TRANSMEMBRANE (PHOBIUS);SIGNAL_PEPTIDE (PHOBIUS);PS50866 (PROSITE_PROFILES);SSF101576 (SUPERFAMILY);TMhelix (TMHMM)	GO:0016021/GO:0006810;GO:0016021/GO:0006810;GO:0016021/GO:0006810;GO:0016021/GO:0006810	integral component of membrane/transport;integral component of membrane/transport;integral component of membrane/transport;integral component of membrane/transport	Cellular Component/Biological Process;Cellular Component/Biological Process;Cellular Component/Biological Process;Cellular Component/Biological Process	MS-DArT_site_7828,MS-DArT_site_7829	0,0
Eucgr.B01002	Chr02	13962349	13970636	+	K05288 - phosphatidylinositol glycan, class O (PIGO) (1 of 1) & GPI ethanolamine phosphate transferase 3	GO:0003824 & GO:0008152 & GO:0016021			Coil (COILS);PF01663 (PFAM);G3DSA:3.40.720.10 (GENE3D);PTHR23071:SF1 (PANTHER);PTHR23071 (PANTHER);TRANSMEMBRANE (PHOBIUS);TRANSMEMBRANE (PHOBIUS);NON_CYTOPLASMIC_DOMAIN (PHOBIUS);NON_CYTOPLASMIC_DOMAIN (PHOBIUS);NON_CYTOPLASMIC_DOMAIN (PHOBIUS);CYTOPLASMIC_DOMAIN (PHOBIUS);TRANSMEMBRANE (PHOBIUS);TRANSMEMBRANE (PHOBIUS);NON_CYTOPLASMIC_DOMAIN (PHOBIUS);TRANSMEMBRANE (PHOBIUS);TRANSMEMBRANE (PHOB…	GO:0003824;GO:0008152/GO:0003824;GO:0003824/GO:0008152	catalytic activity;metabolic process/catalytic activity;catalytic activity/metabolic process	Molecular Function;Biological Process/Molecular Function;Molecular Function/Biological Process	MS-DArT_site_7831	0
Eucgr.B01028	Chr02	14273132	14279294	-	K14777 - ATP-dependent RNA helicase DDX47/RRP3 [EC:3.6.4.13] (DDX47, RRP3) (1 of 2) & DEAD-box ATP-dependent RNA helicase 10	GO:0005524, GO:0003676 & GO:0003676 & GO:0005524 & GO:0010501 & GO:0006364 & GO:0004004	3.6.4.13 & 3.6.1 & 3.6.1.3 & 2.7.7 & 3.6.1.15	RNA helicase. & Acting on acid anhydrides & Adenosinetriphosphatase & Transferring phosphorus-containing groups & Nucleoside-triphosphate phosphatase	SM00490 (SMART);SM00487 (SMART);G3DSA:3.40.50.300 (GENE3D);PF00271 (PFAM);G3DSA:3.40.50.300 (GENE3D);PF00270 (PFAM);PTHR24031:SF78 (PANTHER);PTHR24031 (PANTHER);PS00039 (PROSITE_PATTERNS);PS51192 (PROSITE_PROFILES);PS51195 (PROSITE_PROFILES);PS51194 (PROSITE_PROFILES);SSF52540 (SUPERFAMILY)	GO:0005524/GO:0003676	ATP binding/nucleic acid binding	Molecular Function/Molecular Function	MS-DArT_site_7870	0
Eucgr.B01052	Chr02	15353152	15356886	+	PTHR23257:SF499 - KINASE LIKE PROTEIN (1 of 2) & serine threonine- kinase HT1	GO:0006468, GO:0004672 & GO:0005524 & GO:0000165 & GO:0000186 & GO:0004709 & GO:0005622	2.7.12.1 & 2.7.11.25 & 2.7.11	Dual-specificity kinase. & Mitogen-activated protein kinase kinase kinase & Transferring phosphorus-containing groups	PR00109 (PRINTS);SM00220 (SMART);G3DSA:1.10.510.10 (GENE3D);G3DSA:3.30.200.20 (GENE3D);PF07714 (PFAM);PTHR23257:SF499 (PANTHER);PTHR23257 (PANTHER);PS00108 (PROSITE_PATTERNS);PS50011 (PROSITE_PROFILES);SSF56112 (SUPERFAMILY)	GO:0004672/GO:0006468;GO:0006468/GO:0005524/GO:0004672;GO:0004672/GO:0006468;GO:0004672/GO:0006468;GO:0006468/GO:0005524/GO:0004672	protein kinase activity/protein phosphorylation;protein phosphorylation/ATP binding/protein kinase activity;protein kinase activity/protein phosphorylation;protein kinase activity/protein phosphorylation;protein phosphorylation/ATP binding/protein kinase activity	Molecular Function/Biological Process;Biological Process/Molecular Function/Molecular Function;Molecular Function/Biological Process;Molecular Function/Biological Process;Biological Process/Molecular Function/Molecular Function	MS-DArT_site_7932	0
Eucgr.B01112	Chr02	16851354	16854632	-	PTHR10430:SF7 - PEROXIREDOXIN-2F, MITOCHONDRIAL (1 of 1) & peroxiredoxin- mitochondrial	GO:0016491 & GO:0004601 & GO:0006979 & GO:0005759 & GO:0098869 & GO:0055114 & GO:0051920	1.11.1.15 & 1.11.1.7	Peroxiredoxin. & Peroxiredoxin & Peroxidase	G3DSA:3.40.30.10 (GENE3D);PF08534 (PFAM);PTHR10430 (PANTHER);PTHR10430:SF7 (PANTHER);PS51352 (PROSITE_PROFILES);SSF52833 (SUPERFAMILY)	GO:0016491;GO:0045454	oxidoreductase activity;cell redox homeostasis	Molecular Function;Biological Process	MS-DArT_site_8046|MS-DArT_site_8047	0
Eucgr.B01114	Chr02	16868962	16871301	-	K04708 - 3-dehydrosphinganine reductase (E1.1.1.102) (1 of 2) & 3-dehydrosphinganine reductase TSC10A	GO:0016491 & GO:0016021 & GO:0055114	1.1.1.102	3-dehydrosphinganine reductase.	PR00081 (PRINTS);SM00822 (SMART);G3DSA:3.40.50.720 (GENE3D);PF00106 (PFAM);PTHR24320:SF1 (PANTHER);PTHR24320 (PANTHER);PS00061 (PROSITE_PATTERNS);TRANSMEMBRANE (PHOBIUS);CYTOPLASMIC_DOMAIN (PHOBIUS);TRANSMEMBRANE (PHOBIUS);CYTOPLASMIC_DOMAIN (PHOBIUS);NON_CYTOPLASMIC_DOMAIN (PHOBIUS);TRANSMEMBRANE (PHOBIUS);NON_CYTOPLASMIC_DOMAIN (PHOBIUS);SSF51735 (SUPERFAMILY);TMhelix (TMHMM);TMhelix (TMHMM)	GO:0016491	oxidoreductase activity	Molecular Function	MS-DArT_site_8053|MS-DArT_site_8054	0
Eucgr.B01121	Chr02	16936510	16941211	-	PTHR32285:SF65 - PROTEIN TRICHOME BIREFRINGENCE-LIKE 10-RELATED (1 of 4) & trichome birefringence-like 10	GO:0016021 & GO:0005794 & GO:0071554 & GO:0016413	2.3.1	Acyltransferases	PF14416 (PFAM);PF13839 (PFAM);PTHR32285 (PANTHER);PTHR32285:SF65 (PANTHER);TRANSMEMBRANE (PHOBIUS);CYTOPLASMIC_DOMAIN (PHOBIUS);NON_CYTOPLASMIC_DOMAIN (PHOBIUS);TMhelix (TMHMM)				MS-DArT_site_8062	0
Eucgr.B01123	Chr02	16955781	16961117	-	PTHR11772:SF18 - ALUMINUM INDUCED PROTEIN WITH YGL AND LRDR MOTIFS (1 of 1) & stem-specific TSJT1				SM01172 (SMART);G3DSA:3.60.20.10 (GENE3D);PF12481 (PFAM);PTHR11772:SF18 (PANTHER);PTHR11772 (PANTHER);SSF56235 (SUPERFAMILY)				MS-DArT_site_8066	0
Eucgr.B01157	Chr02	17756567	17763155	+	PTHR24055:SF211 - MITOGEN-ACTIVATED PROTEIN KINASE 16-RELATED (1 of 3) & mitogen-activated kinase	GO:0006468, GO:0005524, GO:0004672 & GO:0005524 & GO:0000165 & GO:0004707 & GO:0005773 & GO:0005886	2.7.11.24 & 2.7.11	Mitogen-activated protein kinase. & Transferring phosphorus-containing groups & Mitogen-activated protein kinase	SM00220 (SMART);G3DSA:1.10.510.10 (GENE3D);PF00069 (PFAM);G3DSA:3.30.200.20 (GENE3D);PTHR24055 (PANTHER);PTHR24055:SF211 (PANTHER);PS01351 (PROSITE_PATTERNS);PS00107 (PROSITE_PATTERNS);PS50011 (PROSITE_PROFILES);SSF56112 (SUPERFAMILY)	GO:0005524/GO:0006468/GO:0004672;GO:0005524/GO:0006468/GO:0004672;GO:0004707/GO:0006468/GO:0005524;GO:0005524;GO:0005524/GO:0006468/GO:0004672	ATP binding/protein phosphorylation/protein kinase activity;ATP binding/protein phosphorylation/protein kinase activity;MAP kinase activity/protein phosphorylation/ATP binding;ATP binding;ATP binding/protein phosphorylation/protein kinase activity	Molecular Function/Biological Process/Molecular Function;Molecular Function/Biological Process/Molecular Function;Molecular Function/Biological Process/Molecular Function;Molecular Function;Molecular Function/Biological Process/Molecular Function	MS-DArT_site_8120	0
Eucgr.B01185	Chr02	18577572	18586075	+	PTHR24006:SF435 - F-BOX/LRR-REPEAT PROTEIN 4 (1 of 1) & F-box LRR-repeat 4	GO:0005515			SM00367 (SMART);G3DSA:3.80.10.10 (GENE3D);G3DSA:3.80.10.10 (GENE3D);PF00646 (PFAM);G3DSA:1.20.1280.50 (GENE3D);PF13516 (PFAM);PTHR24006:SF435 (PANTHER);PTHR24006 (PANTHER);SSF52047 (SUPERFAMILY);SSF52047 (SUPERFAMILY);SSF81383 (SUPERFAMILY)	GO:0005515;GO:0005515;GO:0005515	protein binding;protein binding;protein binding	Molecular Function;Molecular Function;Molecular Function	MS-DArT_site_8197|MS-DArT_site_8198	0
Eucgr.B01280	Chr02	20310701	20318287	-	PTHR12506:SF27 - ZINC FINGER CCCH DOMAIN-CONTAINING PROTEIN 34-RELATED (1 of 3) & zinc finger CCCH domain-containing 34	GO:0046872			SM00356 (SMART);PF00642 (PFAM);G3DSA:4.10.1000.10 (GENE3D);PTHR12506 (PANTHER);PTHR12506:SF27 (PANTHER);PS50103 (PROSITE_PROFILES);SSF90229 (SUPERFAMILY);SSF90229 (SUPERFAMILY);SSF90229 (SUPERFAMILY);SSF90229 (SUPERFAMILY);SSF90229 (SUPERFAMILY)	GO:0046872;GO:0046872;GO:0046872;GO:0046872;GO:0046872;GO:0046872;GO:0046872;GO:0046872;GO:0046872	metal ion binding;metal ion binding;metal ion binding;metal ion binding;metal ion binding;metal ion binding;metal ion binding;metal ion binding;metal ion binding	Molecular Function;Molecular Function;Molecular Function;Molecular Function;Molecular Function;Molecular Function;Molecular Function;Molecular Function;Molecular Function	MS-DArT_site_8325	0
Eucgr.B01309	Chr02	20798553	20803893	-	PTHR13832:SF309 - PROTEIN PHOSPHATASE 2C 40-RELATED (1 of 1) & probable phosphatase 2C 40 isoform X1	GO:0003824, GO:0006470, GO:0004722 & GO:0004722 & GO:0006470	3.1.3.16 & 3.1 & 3.1.3.41	Phosphoprotein phosphatase. & Protein-serine/threonine phosphatase & Acting on ester bonds & 4-nitrophenylphosphatase	SM00332 (SMART);G3DSA:3.60.40.10 (GENE3D);PF00481 (PFAM);PTHR13832:SF309 (PANTHER);PTHR13832 (PANTHER);PS51746 (PROSITE_PROFILES);SSF81606 (SUPERFAMILY)	GO:0003824;GO:0003824;GO:0003824;GO:0004722/GO:0006470;GO:0003824;GO:0003824	catalytic activity;catalytic activity;catalytic activity;protein serine/threonine phosphatase activity/protein dephosphorylation;catalytic activity;catalytic activity	Molecular Function;Molecular Function;Molecular Function;Molecular Function/Biological Process;Molecular Function;Molecular Function	MS-DArT_site_8354|MS-DArT_site_8355	0
Eucgr.B01310	Chr02	20811875	20816428	-	PTHR11777:SF7 - THREONYL AND ALANYL TRNA SYNTHETASE SECOND ADDITIONAL DOMAIN-CONTAINING PROTEIN (1 of 1) & alanine--tRNA ligase	GO:0006419, GO:0005524, GO:0004813, GO:0000166 & GO:0005524 & GO:0004813 & GO:0006450 & GO:0006419 & GO:0002196 & GO:0000049	6.1.1.7 & 6.1.1 & 3.1.1.1	Alanine--tRNA ligase. & Alanine--tRNA ligase & Forming carbon-oxygen bonds & Carboxylesterase	PF01411 (PFAM);PTHR11777:SF7 (PANTHER);PTHR11777 (PANTHER);PS50860 (PROSITE_PROFILES);SSF55186 (SUPERFAMILY);SSF50447 (SUPERFAMILY)	GO:0000166/GO:0004813/GO:0006419/GO:0005524;GO:0003676/GO:0005524/GO:0006419/GO:0004813;GO:0000166	nucleotide binding/alanine-tRNA ligase activity/alanyl-tRNA aminoacylation/ATP binding;nucleic acid binding/ATP binding/alanyl-tRNA aminoacylation/alanine-tRNA ligase activity;nucleotide binding	Molecular Function/Molecular Function/Biological Process/Molecular Function;Molecular Function/Molecular Function/Biological Process/Molecular Function;Molecular Function	MS-DArT_site_8358	0
Eucgr.B01590	Chr02	22029190	22030096	-	histone-lysine N-methyltransferase ATX2-like isoform X2								MS-DArT_site_8467	0
Eucgr.B01575	Chr02	22639495	22641275	+	K01213 - galacturan 1,4-alpha-galacturonidase (E3.2.1.67) (1 of 20) & exopolygalacturonase-like	GO:0005975, GO:0004650 & GO:0005975 & GO:0004650 & GO:0071555 & GO:0005576	3.2.1.15	Polygalacturonase. & Polygalacturonase	SM00710 (SMART);PF00295 (PFAM);G3DSA:2.160.20.10 (GENE3D);PTHR31375:SF35 (PANTHER);PTHR31375 (PANTHER);PS00502 (PROSITE_PATTERNS);SSF51126 (SUPERFAMILY)	GO:0004650/GO:0005975;GO:0004650/GO:0005975	polygalacturonase activity/carbohydrate metabolic process;polygalacturonase activity/carbohydrate metabolic process	Molecular Function/Biological Process;Molecular Function/Biological Process	MS-DArT_site_8534	0
Eucgr.B01556	Chr02	22888712	22893004	+	KOG4249 - Uncharacterized conserved protein (1 of 4) & root UVB sensitive chloroplastic	GO:0009926 & GO:0005739 & GO:0009941 & GO:0016573 & GO:0010224 & GO:0000123			PF04884 (PFAM);PTHR12770:SF5 (PANTHER);PTHR12770 (PANTHER)				MS-DArT_site_8572|MS-DArT_site_8573	0
Eucgr.B01555	Chr02	22898332	22902762	+	K12819 - pre-mRNA-processing factor SLU7 (SLU7) (1 of 2) & pre-mRNA-splicing factor SLU7-A	GO:0000386 & GO:0000375 & GO:0005681			Coil (COILS);PF11708 (PFAM);PTHR12942 (PANTHER);PTHR12942:SF2 (PANTHER)				MS-DArT_site_8577	0
Eucgr.B01550	Chr02	22943203	22960432	-	K06636 - structural maintenance of chromosome 1 (SMC1) (1 of 1) & structural maintenance of chromosomes 1	GO:0051276, GO:0005694, GO:0005524, GO:0005515 & GO:0005634 & GO:0005524 & GO:0051276 & GO:0005694			Coil (COILS);Coil (COILS);Coil (COILS);Coil (COILS);Coil (COILS);Coil (COILS);Coil (COILS);Coil (COILS);Coil (COILS);Coil (COILS);Coil (COILS);PIRSF005719 (PIRSF);SM00968 (SMART);G3DSA:3.40.50.300 (GENE3D);PF02463 (PFAM);G3DSA:3.40.50.300 (GENE3D);PF06470 (PFAM);PTHR18937:SF177 (PANTHER);PTHR18937 (PANTHER);SSF52540 (SUPERFAMILY);SSF52540 (SUPERFAMILY);SSF75553 (SUPERFAMILY)	GO:0005694/GO:0005515/GO:0051276/GO:0005524;GO:0005694/GO:0005515/GO:0051276/GO:0005524;GO:0005694/GO:0005515/GO:0051276/GO:0005524	chromosome/protein binding/chromosome organization/ATP binding;chromosome/protein binding/chromosome organization/ATP binding;chromosome/protein binding/chromosome organization/ATP binding	Cellular Component/Molecular Function/Biological Process/Molecular Function;Cellular Component/Molecular Function/Biological Process/Molecular Function;Cellular Component/Molecular Function/Biological Process/Molecular Function	MS-DArT_site_8594	0
Eucgr.B01536	Chr02	23318027	23326532	-	K17907 - autophagy-related protein 9 (ATG9) (1 of 1), & autophagy-related 9	GO:0006914 & GO:0016021			PF04109 (PFAM);PTHR13038 (PANTHER);PTHR13038:SF10 (PANTHER);PTHR13038 (PANTHER);CYTOPLASMIC_DOMAIN (PHOBIUS);TRANSMEMBRANE (PHOBIUS);NON_CYTOPLASMIC_DOMAIN (PHOBIUS);TRANSMEMBRANE (PHOBIUS);TRANSMEMBRANE (PHOBIUS);TRANSMEMBRANE (PHOBIUS);TRANSMEMBRANE (PHOBIUS);CYTOPLASMIC_DOMAIN (PHOBIUS);CYTOPLASMIC_DOMAIN (PHOBIUS);NON_CYTOPLASMIC_DOMAIN (PHOBIUS);NON_CYTOPLASMIC_DOMAIN (PHOBIUS);TRANSMEMBRANE…				MS-DArT_site_8608	0
Eucgr.B01534	Chr02	23360360	23365327	-	K14826 - FK506-binding nuclear protein [EC:5.2.1.8] (FPR3_4) (1 of 2), & peptidyl-prolyl cis-trans isomerase FKBP53	GO:0006457 & GO:0003755 & GO:0043231 & GO:0044444 & GO:0000413 & GO:0005488 & GO:0044446	5.2.1.8	Peptidylprolyl isomerase. & Peptidylprolyl isomerase	G3DSA:3.10.50.40 (GENE3D);PF00254 (PFAM);PTHR10516 (PANTHER);PTHR10516:SF292 (PANTHER);PS50059 (PROSITE_PROFILES);SSF54534 (SUPERFAMILY)	GO:0006457;GO:0006457	protein folding;protein folding	Biological Process;Biological Process	MS-DArT_site_8617	0
Eucgr.B01529	Chr02	23520442	23521264	+	PTHR31529:SF2 - LOB DOMAIN-CONTAINING PROTEIN 17-RELATED (1 of 1) & LOB domain-containing 29				Coil (COILS);PF03195 (PFAM);PTHR31529:SF2 (PANTHER);PTHR31529 (PANTHER);PS50891 (PROSITE_PROFILES)				MS-DArT_site_8626	0
Eucgr.B01526	Chr02	23546553	23558400	-	K03593 - ATP-binding protein involved in chromosome partitioning (mrp, NUBPL) (1 of 1) & iron-sulfur NUBPL				G3DSA:3.40.50.300 (GENE3D);PF10609 (PFAM);PTHR23264 (PANTHER);PTHR23264:SF31 (PANTHER);MF_02040 (HAMAP);SSF52540 (SUPERFAMILY)				MS-DArT_site_8627|MS-DArT_site_8628	0
Eucgr.B01495	Chr02	24212872	24220229	-	PTHR10825//PTHR10825:SF28 - RING FINGER DOMAIN-CONTAINING, POLYCOMB GROUP COMPONENT // SUBFAMILY NOT NAMED (1 of 1) & E3 ubiquitin ligase DRIP2-like	GO:0046872 & GO:0008270 & GO:0016874			SM00184 (SMART);PF13923 (PFAM);G3DSA:3.30.40.10 (GENE3D);PTHR10825 (PANTHER);PTHR10825:SF28 (PANTHER);PS00518 (PROSITE_PATTERNS);PS50089 (PROSITE_PROFILES);SSF57850 (SUPERFAMILY)	GO:0008270/GO:0005515;GO:0008270/GO:0005515	zinc ion binding/protein binding;zinc ion binding/protein binding	Molecular Function/Molecular Function;Molecular Function/Molecular Function	MS-DArT_site_8698|MS-DArT_site_8700	0
Eucgr.B01476	Chr02	24489902	24497218	-	PTHR35129:SF2 - GUANINE NUCLEOTIDE-BINDING PROTEIN SUBUNIT GAMMA 1 (1 of 1) & guanine nucleotide-binding subunit gamma 2-like	GO:0007186, GO:0005834, GO:0004871 & GO:0009817 & GO:0015696 & GO:0005834 & GO:0007186 & GO:0018342 & GO:0005794 & GO:0018345 & GO:0010541 & GO:0004871 & GO:0009845 & GO:0010540 & GO:0048527			Coil (COILS);SM01224 (SMART);PF00631 (PFAM);PTHR35129:SF2 (PANTHER);PTHR35129 (PANTHER)	GO:0007186/GO:0005834/GO:0004871	G-protein coupled receptor signaling pathway/heterotrimeric G-protein complex/signal transducer activity	Biological Process/Cellular Component/Molecular Function	MS-DArT_site_8726	0
Eucgr.B01475	Chr02	24499058	24503756	+	2.1.1.295 - 2-methyl-6-phytyl-1,4-hydroquinone methyltransferase / MPBQ/MSBQ methyltransferase (1 of 1) & 2-methyl-6-phytyl-1,4-hydroquinone chloroplastic-like	GO:0008168, GO:0008152 & GO:0005737 & GO:0019031 & GO:0016021 & GO:0008757 & GO:0032259	2.1.1.295		G3DSA:3.40.50.150 (GENE3D);PF08241 (PFAM);PTHR10108 (PANTHER);PTHR10108:SF920 (PANTHER);NON_CYTOPLASMIC_DOMAIN (PHOBIUS);CYTOPLASMIC_DOMAIN (PHOBIUS);TRANSMEMBRANE (PHOBIUS);PS51734 (PROSITE_PROFILES);SSF53335 (SUPERFAMILY);TMhelix (TMHMM)	GO:0008152/GO:0008168;GO:0032259	metabolic process/methyltransferase activity;methylation	Biological Process/Molecular Function;Biological Process	MS-DArT_site_8728	0
Eucgr.B01462	Chr02	24838010	24842664	-	PTHR11075:SF46 - PROTEIN HIGH CHLOROPHYLL FLUORESCENT 109 (1 of 1) & peptide chain release factor chloroplastic	GO:0006415, GO:0003747, GO:0016149, GO:0005737 & GO:0009570 & GO:0006415 & GO:0043022 & GO:0006396 & GO:0009657 & GO:0016149			Coil (COILS);SM00937 (SMART);PF00472 (PFAM);G3DSA:1.20.58.410 (GENE3D);TIGR00020 (TIGRFAM);G3DSA:3.30.160.20 (GENE3D);PF03462 (PFAM);PTHR11075 (PANTHER);PTHR11075:SF46 (PANTHER);PS00745 (PROSITE_PATTERNS);SSF75620 (SUPERFAMILY)	GO:0016149/GO:0006415/GO:0005737;GO:0003747/GO:0006415;GO:0005737/GO:0016149/GO:0006415;GO:0016149/GO:0006415/GO:0005737;GO:0003747/GO:0006415	translation release factor activity, codon specific/translational termination/cytoplasm;translation release factor activity/translational termination;cytoplasm/translation release factor activity, codon specific/translational termination;translation release factor activity, codon specific/translational termination/cytoplasm;translation release factor activity/translational termination	Molecular Function/Biological Process/Cellular Component;Molecular Function/Biological Process;Cellular Component/Molecular Function/Biological Process;Molecular Function/Biological Process/Cellular Component;Molecular Function/Biological Process	MS-DArT_site_8745	0
Eucgr.B01457	Chr02	24952578	24959594	+	K10750 - chromatin assembly factor 1 subunit A (CHAF1A) (1 of 1) & chromatin assembly factor 1 subunit FAS1	GO:0048856 & GO:0006325 & GO:0044767			Coil (COILS);PF12253 (PFAM);PTHR15272:SF0 (PANTHER);PTHR15272 (PANTHER)				MS-DArT_site_8755	0
Eucgr.B01452	Chr02	25004009	25016150	-	PTHR12585:SF29 - FI11703P (1 of 1) & sister chromatid cohesion 1 4	GO:0000228, GO:0005515 & GO:0000228 & GO:0070601 & GO:0006302			PF04825 (PFAM);PF04824 (PFAM);G3DSA:1.10.10.580 (GENE3D);PTHR12585 (PANTHER);PTHR12585:SF29 (PANTHER);SSF46785 (SUPERFAMILY)	GO:0005515;GO:0000228	protein binding;nuclear chromosome	Molecular Function;Cellular Component	MS-DArT_site_8760	0
Eucgr.B01436	Chr02	25345687	25351141	-	PTHR11440:SF53 - PHOSPHOLIPASE A(1) LCAT3 (1 of 2) & phospholipase A(1) LCAT3 isoform X1	GO:0008374, GO:0006629 & GO:0008374 & GO:0006629	3.1.1.32 & 2.3.1	Phospholipase A(1). & Acyltransferases	PF02450 (PFAM);G3DSA:3.40.50.1820 (GENE3D);PTHR11440 (PANTHER);PTHR11440:SF53 (PANTHER);SSF53474 (SUPERFAMILY)	GO:0008374/GO:0006629	O-acyltransferase activity/lipid metabolic process	Molecular Function/Biological Process	MS-DArT_site_8785	0
Eucgr.B01428	Chr02	25396000	25402505	-	PTHR12375 - RNA-BINDING PROTEIN LUC7-RELATED (1 of 1), & RNA-binding Luc7-like 2	GO:0006376, GO:0005685, GO:0003729 & GO:0006376 & GO:0003729 & GO:0071004 & GO:0005685			Coil (COILS);Coil (COILS);Coil (COILS);PF03194 (PFAM);PTHR12375:SF32 (PANTHER);PTHR12375 (PANTHER)	GO:0005685/GO:0006376/GO:0003729;GO:0005685/GO:0006376/GO:0003729	U1 snRNP/mRNA splice site selection/mRNA binding;U1 snRNP/mRNA splice site selection/mRNA binding	Cellular Component/Biological Process/Molecular Function;Cellular Component/Biological Process/Molecular Function	MS-DArT_site_8790	0
Eucgr.B01418	Chr02	25493928	25500922	-	PTHR14208 - BASIC LEUCINE ZIPPER AND W2 DOMAIN-CONTAINING PROTEIN (1 of 2) & basic leucine zipper and W2 domain-containing 2	GO:0005515 & GO:0003743 & GO:0006413			Coil (COILS);SM00515 (SMART);G3DSA:1.25.40.180 (GENE3D);PF02020 (PFAM);PTHR14208 (PANTHER);PS51363 (PROSITE_PROFILES);SSF48371 (SUPERFAMILY)	GO:0005515;GO:0005515;GO:0005515;GO:0005488	protein binding;protein binding;protein binding;binding	Molecular Function;Molecular Function;Molecular Function;Molecular Function	MS-DArT_site_8811,MS-DArT_site_8810	0,0
Eucgr.B01415	Chr02	25519551	25522049	+	K18835 - WRKY transcription factor 2 (WRKY2) (1 of 2) & probable WRKY transcription factor 2	GO:0043565, GO:0006355, GO:0003700 & GO:0003700 & GO:0006355 & GO:0043565			SM00774 (SMART);PF03106 (PFAM);G3DSA:2.20.25.80 (GENE3D);PTHR31221:SF1 (PANTHER);PTHR31221:SF1 (PANTHER);PTHR31221 (PANTHER);PTHR31221 (PANTHER);PS50811 (PROSITE_PROFILES);PS50811 (PROSITE_PROFILES);SSF118290 (SUPERFAMILY);SSF118290 (SUPERFAMILY)	GO:0043565/GO:0003700/GO:0006355;GO:0043565/GO:0003700/GO:0006355;GO:0043565/GO:0003700/GO:0006355;GO:0043565/GO:0003700/GO:0006355;GO:0043565/GO:0003700/GO:0006355;GO:0043565/GO:0003700/GO:0006355;GO:0043565/GO:0003700/GO:0006355	sequence-specific DNA binding/transcription factor activity, sequence-specific DNA binding/regulation of transcription, DNA-templated;sequence-specific DNA binding/transcription factor activity, sequence-specific DNA binding/regulation of transcription, DNA-templated;sequence-specific DNA binding/transcription factor activity, sequence-specific DNA binding/regulation of transcription, DNA-templat…	Molecular Function/Molecular Function/Biological Process;Molecular Function/Molecular Function/Biological Process;Molecular Function/Molecular Function/Biological Process;Molecular Function/Molecular Function/Biological Process;Molecular Function/Molecular Function/Biological Process;Molecular Function/Molecular Function/Biological Process;Molecular Function/Molecular Function/Biological Process	MS-DArT_site_8816	0
Eucgr.B01378	Chr02	25967624	25974832	-	2.4.1.173 - Sterol 3-beta-glucosyltransferase (1 of 6) & sterol 3-beta-glucosyltransferase UGT80A2-like isoform X2	GO:0030259, GO:0016758, GO:0005975, GO:0008152 & GO:0005975 & GO:0016758 & GO:0030259	2.4.1.173	Sterol 3-beta-glucosyltransferase.	G3DSA:3.40.50.2000 (GENE3D);PF03033 (PFAM);G3DSA:3.40.50.2000 (GENE3D);PTHR11926:SF308 (PANTHER);PTHR11926 (PANTHER);SSF53756 (SUPERFAMILY)	GO:0030259/GO:0016758/GO:0005975;GO:0008152/GO:0016758	lipid glycosylation/transferase activity, transferring hexosyl groups/carbohydrate metabolic process;metabolic process/transferase activity, transferring hexosyl groups	Biological Process/Molecular Function/Biological Process;Biological Process/Molecular Function	MS-DArT_site_8879	0
Eucgr.B01361	Chr02	26187832	26201043	+	PTHR22847:SF387 - GENERAL TRANSCRIPTIONAL COREPRESSOR TUPA (1 of 1) & hypothetical protein EUGRSUZ_B013612, partial	GO:0005886			SM00320 (SMART);G3DSA:2.130.10.10 (GENE3D);PTHR22847 (PANTHER);PTHR22847:SF387 (PANTHER);PS00678 (PROSITE_PATTERNS);PS50082 (PROSITE_PROFILES);PS50294 (PROSITE_PROFILES);SSF50978 (SUPERFAMILY)	GO:0005515;GO:0005515;GO:0005515;GO:0005515;GO:0005515	protein binding;protein binding;protein binding;protein binding;protein binding	Molecular Function;Molecular Function;Molecular Function;Molecular Function;Molecular Function	MS-DArT_site_8910,MS-DArT_site_8906|MS-DArT_site_8907,MS-DArT_site_8908	0,0,0
Eucgr.B01360	Chr02	26203029	26208960	-	K14779 - ATP-dependent RNA helicase DDX52/ROK1 [EC:3.6.4.13] (DDX52, ROK1) (1 of 1) & DEAD-box ATP-dependent RNA helicase 57	GO:0016787, GO:0005524, GO:0003677 & GO:0003676 & GO:0005524 & GO:0010501 & GO:0006364 & GO:0004004	3.6.4.13 & 3.6.1 & 3.6.1.3 & 2.7.7 & 3.6.1.15	RNA helicase. & Acting on acid anhydrides & Adenosinetriphosphatase & Transferring phosphorus-containing groups & Nucleoside-triphosphate phosphatase	SM00490 (SMART);SM00487 (SMART);G3DSA:3.40.50.300 (GENE3D);PF00271 (PFAM);PF00270 (PFAM);G3DSA:3.40.50.300 (GENE3D);PTHR24031:SF336 (PANTHER);PTHR24031 (PANTHER);PS51192 (PROSITE_PROFILES);PS51195 (PROSITE_PROFILES);PS51194 (PROSITE_PROFILES);SSF52540 (SUPERFAMILY)	GO:0003676/GO:0005524	nucleic acid binding/ATP binding	Molecular Function/Molecular Function	MS-DArT_site_8911	0
Eucgr.B01356	Chr02	26233663	26239444	+	PTHR24423:SF519 - PHYTOCHROME A (1 of 1), & phytochrome A	GO:0007165, GO:0000155, GO:0005515, GO:0006355, GO:0018298, GO:0009584 & GO:0016604 & GO:0042803 & GO:0009585 & GO:0009640 & GO:0006351 & GO:0009584 & GO:0010161 & GO:0006355 & GO:0009630 & GO:0023014 & GO:0000155 & GO:0031516 & GO:0009638 & GO:0005737 & GO:0046685 & GO:0000160 & GO:0010203 & GO:0018298 & GO:0010018 & GO:0017148 & GO:0017006 & GO:0010201	2.7.3 & 2.7.13.3	Transferring phosphorus-containing groups & Histidine kinase	PR01033 (PRINTS);SM00091 (SMART);PIRSF000084 (PIRSF);SM00065 (SMART);SM00387 (SMART);SM00388 (SMART);PF01590 (PFAM);TIGR00229 (TIGRFAM);PF00512 (PFAM);PF00360 (PFAM);G3DSA:3.30.450.20 (GENE3D);PF00989 (PFAM);PF02518 (PFAM);PF08446 (PFAM);G3DSA:3.30.565.10 (GENE3D);G3DSA:3.30.450.20 (GENE3D);PTHR24423:SF519 (PANTHER);PTHR24423 (PANTHER);PS00245 (PROSITE_PATTERNS);PS50112 (PROSITE_PROFILES);PS50109…	GO:0006355/GO:0009584;GO:0009585/GO:0042803/GO:0017006/GO:0006355/GO:0009881;GO:0005515;GO:0007165/GO:0000155;GO:0005515;GO:0007165/GO:0000155;GO:0006355/GO:0018298/GO:0009584;GO:0006355;GO:0006355;GO:0018298;GO:0018298	regulation of transcription, DNA-templated/detection of visible light;red, far-red light phototransduction/protein homodimerization activity/protein-tetrapyrrole linkage/regulation of transcription, DNA-templated/photoreceptor activity;protein binding;signal transduction/phosphorelay sensor kinase activity;protein binding;signal transduction/phosphorelay sensor kinase activity;regulation of trans…	Biological Process/Biological Process;Biological Process/Molecular Function/Biological Process/Biological Process/Molecular Function;Molecular Function;Biological Process/Molecular Function;Molecular Function;Biological Process/Molecular Function;Biological Process/Biological Process/Biological Process;Biological Process;Biological Process;Biological Process;Biological Process	MS-DArT_site_8923,MS-DArT_site_8922	0,0
Eucgr.B01628	Chr02	27459799	27465023	-	6.1.1.2 - Tryptophan--tRNA ligase / Tryptophanyl-tRNA synthetase (1 of 3) & tryptophan--tRNA cytoplasmic	GO:0006418, GO:0005524, GO:0004812, GO:0000166, GO:0006436, GO:0005737, GO:0004830 & GO:0005524 & GO:0005829 & GO:0016740 & GO:0006436 & GO:0004830	6.1.1.2 & 6.1.1	Tryptophan--tRNA ligase. & Tryptophan--tRNA ligase & Forming carbon-oxygen bonds	PR01039 (PRINTS);G3DSA:3.40.50.620 (GENE3D);G3DSA:1.10.240.10 (GENE3D);TIGR00233 (TIGRFAM);PF00579 (PFAM);PTHR10055 (PANTHER);PTHR10055:SF1 (PANTHER);PS00178 (PROSITE_PATTERNS);SSF52374 (SUPERFAMILY)	GO:0005737/GO:0005524/GO:0004830/GO:0006436/GO:0000166;GO:0005737/GO:0005524/GO:0004830/GO:0006436/GO:0000166;GO:0005524/GO:0006418/GO:0000166/GO:0004812;GO:0005737/GO:0005524/GO:0004830/GO:0006436/GO:0000166;GO:0006418/GO:0005524/GO:0000166/GO:0004812	cytoplasm/ATP binding/tryptophan-tRNA ligase activity/tryptophanyl-tRNA aminoacylation/nucleotide binding;cytoplasm/ATP binding/tryptophan-tRNA ligase activity/tryptophanyl-tRNA aminoacylation/nucleotide binding;ATP binding/tRNA aminoacylation for protein translation/nucleotide binding/aminoacyl-tRNA ligase activity;cytoplasm/ATP binding/tryptophan-tRNA ligase activity/tryptophanyl-tRNA aminoacyl…	Cellular Component/Molecular Function/Molecular Function/Biological Process/Molecular Function;Cellular Component/Molecular Function/Molecular Function/Biological Process/Molecular Function;Molecular Function/Biological Process/Molecular Function/Molecular Function;Cellular Component/Molecular Function/Molecular Function/Biological Process/Molecular Function;Biological Process/Molecular Function/…	MS-DArT_site_8997	0
Eucgr.B01630	Chr02	27526175	27532660	+	2.4.1.173 - Sterol 3-beta-glucosyltransferase (1 of 6) & sterol 3-beta-glucosyltransferase UGT80A2-like isoform X2	GO:0030259, GO:0016758, GO:0005975, GO:0008152 & GO:0005975 & GO:0016758 & GO:0030259	2.4.1.173	Sterol 3-beta-glucosyltransferase.	G3DSA:3.40.50.2000 (GENE3D);G3DSA:3.40.50.2000 (GENE3D);PF03033 (PFAM);PF00201 (PFAM);PTHR11926 (PANTHER);PTHR11926:SF308 (PANTHER);SSF53756 (SUPERFAMILY)	GO:0016758/GO:0005975/GO:0030259;GO:0016758/GO:0008152;GO:0016758/GO:0008152	transferase activity, transferring hexosyl groups/carbohydrate metabolic process/lipid glycosylation;transferase activity, transferring hexosyl groups/metabolic process;transferase activity, transferring hexosyl groups/metabolic process	Molecular Function/Biological Process/Biological Process;Molecular Function/Biological Process;Molecular Function/Biological Process	MS-DArT_site_9004	0
Eucgr.B01798	Chr02	29194011	29198216	+	PTHR14732:SF0 - RNA POLYMERASE II SUBUNIT B1 CTD PHOSPHATASE RPAP2-RELATED (1 of 1) & RNA polymerase II subunit B1 CTD phosphatase RPAP2 homolog	GO:0005634 & GO:0005737 & GO:0070940 & GO:0008420	3.1.3.16 & 3.1 & 3.1.3.41	Phosphoprotein phosphatase. & Protein-serine/threonine phosphatase & Acting on ester bonds & 4-nitrophenylphosphatase	PF04181 (PFAM);PTHR14732:SF0 (PANTHER);PTHR14732 (PANTHER);PS51479 (PROSITE_PROFILES)				MS-DArT_site_9136	0
Eucgr.L00271	Chr02	31169627	31175863	-	K01507 - inorganic pyrophosphatase (ppa) (1 of 18) & pyrophosphate-energized vacuolar membrane proton pump 1-like	GO:0016020, GO:0015992, GO:0009678, GO:0004427 & GO:0004427 & GO:0015992 & GO:0055085 & GO:0032440 & GO:0016021 & GO:0055114 & GO:0009678	3.6.1.1 & 1.3.1.74 & 3.6.1	Inorganic diphosphatase. & Inorganic diphosphatase & 2-alkenal reductase (NAD(P)(+)) & Acting on acid anhydrides	PIRSF001265 (PIRSF);TIGR01104 (TIGRFAM);PF03030 (PFAM);PTHR31998 (PANTHER);PTHR31998:SF12 (PANTHER);CYTOPLASMIC_DOMAIN (PHOBIUS);NON_CYTOPLASMIC_DOMAIN (PHOBIUS);TRANSMEMBRANE (PHOBIUS);CYTOPLASMIC_DOMAIN (PHOBIUS);CYTOPLASMIC_DOMAIN (PHOBIUS);TRANSMEMBRANE (PHOBIUS);NON_CYTOPLASMIC_DOMAIN (PHOBIUS);TRANSMEMBRANE (PHOBIUS);NON_CYTOPLASMIC_DOMAIN (PHOBIUS);NON_CYTOPLASMIC_DOMAIN (PHOBIUS);TRANSMEM…	GO:0016020/GO:0009678/GO:0004427/GO:0015992;GO:0016020/GO:0009678/GO:0004427/GO:0015992;GO:0016020/GO:0009678/GO:0004427/GO:0015992;GO:0016020/GO:0009678/GO:0004427/GO:0015992	membrane/hydrogen-translocating pyrophosphatase activity/inorganic diphosphatase activity/proton transport;membrane/hydrogen-translocating pyrophosphatase activity/inorganic diphosphatase activity/proton transport;membrane/hydrogen-translocating pyrophosphatase activity/inorganic diphosphatase activity/proton transport;membrane/hydrogen-translocating pyrophosphatase activity/inorganic diphosphata…	Cellular Component/Molecular Function/Molecular Function/Biological Process;Cellular Component/Molecular Function/Molecular Function/Biological Process;Cellular Component/Molecular Function/Molecular Function/Biological Process;Cellular Component/Molecular Function/Molecular Function/Biological Process	MS-DArT_site_9299,MS-DArT_site_9300	0,0
Eucgr.L00266	Chr02	31215069	31226297	-	K08675 - Lon-like ATP-dependent protease [EC:3.4.21.-] (PRSS15, PIM1) (1 of 1) & lon protease homolog mitochondrial-like	GO:0005524, GO:0006508, GO:0004176, GO:0004252, GO:0030163 & GO:0005524 & GO:0070407 & GO:0006515 & GO:0005759 & GO:0051131 & GO:0004252 & GO:0090296 & GO:0034599 & GO:0043565 & GO:0004176	3.4.21.53 & 3.4.21 & 3.6.1 & 3.6.1.3 & 3.6.1.15	Endopeptidase La. & Acting on peptide bonds (peptidases) & Acting on acid anhydrides & Adenosinetriphosphatase & Nucleoside-triphosphate phosphatase	Coil (COILS);PR00830 (PRINTS);SM00464 (SMART);SM00382 (SMART);TIGR00763 (TIGRFAM);PF02190 (PFAM);PF00004 (PFAM);G3DSA:1.10.8.60 (GENE3D);G3DSA:3.40.50.300 (GENE3D);PF05362 (PFAM);G3DSA:3.30.230.10 (GENE3D);PTHR10046 (PANTHER);PTHR10046:SF44 (PANTHER);PS01046 (PROSITE_PATTERNS);MF_03120 (HAMAP);SSF88697 (SUPERFAMILY);SSF52540 (SUPERFAMILY);SSF54211 (SUPERFAMILY)	GO:0004176/GO:0006508;GO:0005524/GO:0004176/GO:0006508;GO:0004176/GO:0006508;GO:0005524;GO:0004176/GO:0006508/GO:0004252;GO:0030163/GO:0004252/GO:0004176/GO:0005524;GO:0004176/GO:0004252/GO:0006508;GO:0004252/GO:0006515	ATP-dependent peptidase activity/proteolysis;ATP binding/ATP-dependent peptidase activity/proteolysis;ATP-dependent peptidase activity/proteolysis;ATP binding;ATP-dependent peptidase activity/proteolysis/serine-type endopeptidase activity;protein catabolic process/serine-type endopeptidase activity/ATP-dependent peptidase activity/ATP binding;ATP-dependent peptidase activity/serine-type endopepti…	Molecular Function/Biological Process;Molecular Function/Molecular Function/Biological Process;Molecular Function/Biological Process;Molecular Function;Molecular Function/Biological Process/Molecular Function;Biological Process/Molecular Function/Molecular Function/Molecular Function;Molecular Function/Molecular Function/Biological Process;Molecular Function/Biological Process	MS-DArT_site_9309	0
Eucgr.L00263	Chr02	31252717	31259655	-	PTHR22904:SF323 - CARBOXYLATE CLAMP-TETRATRICOPEPTIDE REPEAT (1 of 1) & RNA polymerase II-associated 3 isoform X1				SM00028 (SMART);PF13877 (PFAM);G3DSA:1.25.40.10 (GENE3D);PTHR22904:SF323 (PANTHER);PTHR22904 (PANTHER);PS50005 (PROSITE_PROFILES);PS50293 (PROSITE_PROFILES);SSF48452 (SUPERFAMILY)	GO:0005515;GO:0005515;GO:0005515;GO:0005515;GO:0005515	protein binding;protein binding;protein binding;protein binding;protein binding	Molecular Function;Molecular Function;Molecular Function;Molecular Function;Molecular Function	MS-DArT_site_9315|MS-DArT_site_9316,MS-DArT_site_9317|MS-DArT_site_9318	0,0
Eucgr.B02077	Chr02	35611483	35616940	+	PTHR31875:SF0 - PROTEIN DEHYDRATION-INDUCED 19-RELATED (1 of 2) & DEHYDRATION-INDUCED 19 homolog 3				PF14571 (PFAM);PF05605 (PFAM);PTHR31875 (PANTHER);PTHR31875:SF0 (PANTHER)				MS-DArT_site_9643	0
Eucgr.B02075	Chr02	35625696	35634731	-	PTHR22847:SF424 - TOPLESS-RELATED PROTEIN 2-RELATED (1 of 2) & topless-related 3	GO:0005515 & GO:0006355			SM00668 (SMART);SM00320 (SMART);SM00667 (SMART);G3DSA:2.130.10.10 (GENE3D);PF00400 (PFAM);G3DSA:2.130.10.10 (GENE3D);PTHR22847 (PANTHER);PTHR22847:SF424 (PANTHER);PS00678 (PROSITE_PATTERNS);PS50294 (PROSITE_PROFILES);PS50082 (PROSITE_PROFILES);PS50896 (PROSITE_PROFILES);PS50897 (PROSITE_PROFILES);SSF50978 (SUPERFAMILY);SSF50978 (SUPERFAMILY)	GO:0005515;GO:0005515;GO:0005515;GO:0005515;GO:0005515;GO:0006355;GO:0005515;GO:0005515;GO:0005515;GO:0005515;GO:0005515	protein binding;protein binding;protein binding;protein binding;protein binding;regulation of transcription, DNA-templated;protein binding;protein binding;protein binding;protein binding;protein binding	Molecular Function;Molecular Function;Molecular Function;Molecular Function;Molecular Function;Biological Process;Molecular Function;Molecular Function;Molecular Function;Molecular Function;Molecular Function	MS-DArT_site_9646	0
Eucgr.B01908	Chr02	35863434	35865831	-	K02883 - large subunit ribosomal protein L18e (RP-L18e, RPL18) (1 of 3), & 60S ribosomal L18-2	GO:0006412, GO:0005840, GO:0005622, GO:0003735 & GO:0003735 & GO:0005840 & GO:0006412			G3DSA:3.100.10.10 (GENE3D);PF17135 (PFAM);PTHR10934 (PANTHER);SSF52080 (SUPERFAMILY)	GO:0006412/GO:0005840/GO:0005622/GO:0003735	translation/ribosome/intracellular/structural constituent of ribosome	Biological Process/Cellular Component/Cellular Component/Molecular Function	MS-DArT_site_9674,MS-DArT_site_9673	0,0
Eucgr.B01936	Chr02	36077307	36081902	-	PTHR10593:SF31 - C2H2-LIKE ZINC FINGER PROTEIN-RELATED (1 of 2) & indeterminate-domain 2-like	GO:0003676 & GO:0046872			SM00355 (SMART);PF12171 (PFAM);G3DSA:3.30.160.60 (GENE3D);G3DSA:3.30.160.60 (GENE3D);PTHR10593:SF31 (PANTHER);PTHR10593 (PANTHER);PS00028 (PROSITE_PATTERNS);SIGNAL_PEPTIDE_H_REGION (PHOBIUS);SIGNAL_PEPTIDE_N_REGION (PHOBIUS);NON_CYTOPLASMIC_DOMAIN (PHOBIUS);SIGNAL_PEPTIDE_C_REGION (PHOBIUS);SIGNAL_PEPTIDE (PHOBIUS);PS50157 (PROSITE_PROFILES);SSF57667 (SUPERFAMILY)	GO:0003676;GO:0003676;GO:0046872;GO:0046872	nucleic acid binding;nucleic acid binding;metal ion binding;metal ion binding	Molecular Function;Molecular Function;Molecular Function;Molecular Function	MS-DArT_site_9730|MS-DArT_site_9732	0
Eucgr.B01945	Chr02	36232752	36247981	-	K02350 - DNA polymerase zeta (POLZ1, rev3) (1 of 1) & DNA polymerase zeta catalytic subunit isoform X1	GO:0008408, GO:0003677, GO:0000166, GO:0019985, GO:0016035, GO:0006281 & GO:0000166 & GO:0003677 & GO:0008408 & GO:0090305 & GO:0003887 & GO:0006260 & GO:0016035 & GO:0019985	2.7.7.7 & 3.1	DNA-directed DNA polymerase. & Acting on ester bonds & DNA-directed DNA polymerase	PR00106 (PRINTS);SM00486 (SMART);PF14260 (PFAM);G3DSA:1.10.287.690 (GENE3D);PF03104 (PFAM);G3DSA:3.30.420.10 (GENE3D);PF00136 (PFAM);G3DSA:3.90.1600.10 (GENE3D);PTHR10322 (PANTHER);PTHR10322:SF5 (PANTHER);PS00116 (PROSITE_PATTERNS);SSF56672 (SUPERFAMILY);SSF53098 (SUPERFAMILY)	GO:0000166/GO:0003887/GO:0003676;GO:0000166/GO:0003887/GO:0003676;GO:0008408;GO:0003676;GO:0003677/GO:0000166;GO:0019985/GO:0006281/GO:0016035;GO:0003887/GO:0003676/GO:0000166;GO:0003676	nucleotide binding/DNA-directed DNA polymerase activity/nucleic acid binding;nucleotide binding/DNA-directed DNA polymerase activity/nucleic acid binding;3'-5' exonuclease activity;nucleic acid binding;DNA binding/nucleotide binding;translesion synthesis/DNA repair/zeta DNA polymerase complex;DNA-directed DNA polymerase activity/nucleic acid binding/nucleotide binding;nucleic acid binding	Molecular Function/Molecular Function/Molecular Function;Molecular Function/Molecular Function/Molecular Function;Molecular Function;Molecular Function;Molecular Function/Molecular Function;Biological Process/Biological Process/Cellular Component;Molecular Function/Molecular Function/Molecular Function;Molecular Function	MS-DArT_site_9744,MS-DArT_site_9747	0,0
Eucgr.B01946	Chr02	36253168	36256244	-	PTHR20932//PTHR20932:SF9 - LOC443603 PROTEIN-RELATED // SUBFAMILY NOT NAMED (1 of 3) & F-box At1g55000	GO:0005515			PTHR20932:SF9 (PANTHER);PTHR20932 (PANTHER)				MS-DArT_site_9748	0
Eucgr.B01971	Chr02	36732773	36734058	-	dnaJ homolog subfamily C member 5 homolog	GO:0009507							MS-DArT_site_9794	0
Eucgr.B01990	Chr02	36952929	36960705	-	K07870 - Ras homolog gene family, member T1 (RHOT1, ARHT1) (1 of 1), & mitochondrial Rho GTPase 1	GO:0007264, GO:0005525 & GO:0031307 & GO:0005525 & GO:0007264 & GO:0003924 & GO:0005509 & GO:0007005	3.6.1 & 3.6.1.15	Acting on acid anhydrides & Nucleoside-triphosphate phosphatase	PR00449 (PRINTS);SM00175 (SMART);SM00174 (SMART);SM00173 (SMART);PF00071 (PFAM);PF08355 (PFAM);PIRSF037488 (PIRSF);G3DSA:3.40.50.300 (GENE3D);PF08356 (PFAM);G3DSA:1.10.238.10 (GENE3D);G3DSA:3.40.50.300 (GENE3D);PTHR24072 (PANTHER);PTHR24072:SF166 (PANTHER);PS00018 (PROSITE_PATTERNS);CYTOPLASMIC_DOMAIN (PHOBIUS);NON_CYTOPLASMIC_DOMAIN (PHOBIUS);TRANSMEMBRANE (PHOBIUS);PS51423 (PROSITE_PROFILES);PS…	GO:0007264/GO:0005525;GO:0005739/GO:0007005/GO:0031307/GO:0003924/GO:0005509/GO:0005525;GO:0003924/GO:0007264/GO:0005525;GO:0005509;GO:0005509;GO:0003924/GO:0007264/GO:0005525	small GTPase mediated signal transduction/GTP binding;mitochondrion/mitochondrion organization/integral component of mitochondrial outer membrane/GTPase activity/calcium ion binding/GTP binding;GTPase activity/small GTPase mediated signal transduction/GTP binding;calcium ion binding;calcium ion binding;GTPase activity/small GTPase mediated signal transduction/GTP binding	Biological Process/Molecular Function;Cellular Component/Biological Process/Cellular Component/Molecular Function/Molecular Function/Molecular Function;Molecular Function/Biological Process/Molecular Function;Molecular Function;Molecular Function;Molecular Function/Biological Process/Molecular Function	MS-DArT_site_9807,MS-DArT_site_9804,MS-DArT_site_9806	0,0,0
Eucgr.B02001	Chr02	37209142	37222332	-	PTHR11825:SF7 - BRANCHED-CHAIN-AMINO-ACID AMINOTRANSFERASE-LIKE PROTEIN 1-RELATED (1 of 1), & branched-chain-amino-acid aminotransferase 1	GO:0008152, GO:0003824 & GO:0003824 & GO:0008152	2.6.1.42	Branched-chain-amino-acid transaminase.	G3DSA:3.20.10.10 (GENE3D);PF01063 (PFAM);G3DSA:3.30.470.10 (GENE3D);PTHR11825 (PANTHER);PTHR11825:SF7 (PANTHER);SSF52540 (SUPERFAMILY);SSF56752 (SUPERFAMILY)	GO:0003824/GO:0008152;GO:0003824/GO:0008152;GO:0003824/GO:0008152	catalytic activity/metabolic process;catalytic activity/metabolic process;catalytic activity/metabolic process	Molecular Function/Biological Process;Molecular Function/Biological Process;Molecular Function/Biological Process	MS-DArT_site_9840	0
Eucgr.B02004	Chr02	37238036	37254957	+	KOG1893 - Uncharacterized conserved protein (1 of 2) & piezo-type mechanosensitive ion channel homolog	GO:0016021, GO:0008381 & GO:0008381 & GO:0034220 & GO:0016021			PF12166 (PFAM);PTHR13167 (PANTHER);PTHR13167:SF45 (PANTHER);CYTOPLASMIC_DOMAIN (PHOBIUS);TRANSMEMBRANE (PHOBIUS);TRANSMEMBRANE (PHOBIUS);TRANSMEMBRANE (PHOBIUS);SIGNAL_PEPTIDE_H_REGION (PHOBIUS);SIGNAL_PEPTIDE_N_REGION (PHOBIUS);CYTOPLASMIC_DOMAIN (PHOBIUS);TRANSMEMBRANE (PHOBIUS);NON_CYTOPLASMIC_DOMAIN (PHOBIUS);TRANSMEMBRANE (PHOBIUS);NON_CYTOPLASMIC_DOMAIN (PHOBIUS);TRANSMEMBRANE (PHOBIUS);NON…	GO:0008381/GO:0016021	mechanically-gated ion channel activity/integral component of membrane	Molecular Function/Cellular Component	MS-DArT_site_9848	0
Eucgr.B02019	Chr02	37513029	37516177	-	PTHR23500:SF62 - SUGAR TRANSPORTER ERD6-LIKE 14-RELATED (1 of 23) & sugar transporter ERD6-like 5 isoform X1	GO:0055085, GO:0022857, GO:0016021 & GO:0022891 & GO:0055085 & GO:0016021			PR00171 (PRINTS);TIGR00879 (TIGRFAM);G3DSA:1.20.1250.20 (GENE3D);PF00083 (PFAM);PTHR23500:SF62 (PANTHER);PTHR23500 (PANTHER);PS00217 (PROSITE_PATTERNS);CYTOPLASMIC_DOMAIN (PHOBIUS);CYTOPLASMIC_DOMAIN (PHOBIUS);NON_CYTOPLASMIC_DOMAIN (PHOBIUS);CYTOPLASMIC_DOMAIN (PHOBIUS);TRANSMEMBRANE (PHOBIUS);NON_CYTOPLASMIC_DOMAIN (PHOBIUS);TRANSMEMBRANE (PHOBIUS);CYTOPLASMIC_DOMAIN (PHOBIUS);TRANSMEMBRANE (PH…	GO:0055085/GO:0022891/GO:0016020;GO:0055085/GO:0022891/GO:0016020;GO:0016021/GO:0022857/GO:0055085;GO:0005215/GO:0055085/GO:0016021	transmembrane transport/substrate-specific transmembrane transporter activity/membrane;transmembrane transport/substrate-specific transmembrane transporter activity/membrane;integral component of membrane/transmembrane transporter activity/transmembrane transport;transporter activity/transmembrane transport/integral component of membrane	Biological Process/Molecular Function/Cellular Component;Biological Process/Molecular Function/Cellular Component;Cellular Component/Molecular Function/Biological Process;Molecular Function/Biological Process/Cellular Component	MS-DArT_site_9895	0
Eucgr.B01760	Chr02	38544166	38547425	-	K04565 - superoxide dismutase, Cu-Zn family (SOD1) (1 of 4) & superoxide dismutase [Cu-Zn]-like	GO:0055114, GO:0046872, GO:0006801 & GO:0005634 & GO:0008270 & GO:0005507 & GO:0019430 & GO:0005829 & GO:0055114 & GO:0004784	1.15.1.1	Superoxide dismutase. & Superoxide dismutase	PR00068 (PRINTS);G3DSA:2.60.40.200 (GENE3D);PF00080 (PFAM);PTHR10003 (PANTHER);PS00087 (PROSITE_PATTERNS);PS00332 (PROSITE_PATTERNS);SSF49329 (SUPERFAMILY)	GO:0055114/GO:0006801/GO:0046872;GO:0055114/GO:0006801/GO:0046872;GO:0055114/GO:0006801/GO:0046872;GO:0004784/GO:0055114;GO:0004784/GO:0055114;GO:0055114/GO:0006801/GO:0046872	oxidation-reduction process/superoxide metabolic process/metal ion binding;oxidation-reduction process/superoxide metabolic process/metal ion binding;oxidation-reduction process/superoxide metabolic process/metal ion binding;superoxide dismutase activity/oxidation-reduction process;superoxide dismutase activity/oxidation-reduction process;oxidation-reduction process/superoxide metabolic process/m…	Biological Process/Biological Process/Molecular Function;Biological Process/Biological Process/Molecular Function;Biological Process/Biological Process/Molecular Function;Molecular Function/Biological Process;Molecular Function/Biological Process;Biological Process/Biological Process/Molecular Function	MS-DArT_site_10006	0
Eucgr.B02119	Chr02	40200298	40210142	-	K15156 - mediator of RNA polymerase II transcription subunit 14 (MED14, RGR1) (1 of 1) & mediator of RNA polymerase II transcription subunit 14	GO:0016592, GO:0006357, GO:0001104 & GO:0050662 & GO:0003824 & GO:0016592 & GO:0001104 & GO:0006357			PF08638 (PFAM);PTHR12809:SF3 (PANTHER);PTHR12809 (PANTHER);PTHR12809:SF3 (PANTHER);PTHR12809:SF3 (PANTHER);PTHR12809 (PANTHER);PTHR12809 (PANTHER);TRANSMEMBRANE (PHOBIUS);CYTOPLASMIC_DOMAIN (PHOBIUS);NON_CYTOPLASMIC_DOMAIN (PHOBIUS)	GO:0001104/GO:0016592/GO:0006357	RNA polymerase II transcription cofactor activity/mediator complex/regulation of transcription from RNA polymerase II promoter	Molecular Function/Cellular Component/Biological Process	MS-DArT_site_10218,MS-DArT_site_10219	0,0
Eucgr.B02147	Chr02	40468851	40476362	-	PTHR10694:SF41 - JUMONJI DOMAIN-CONTAINING PROTEIN 18-RELATED (1 of 2) & lysine-specific demethylase JMJ16	GO:0005634			SM00545 (SMART);SM00542 (SMART);SM00541 (SMART);SM00558 (SMART);PF02928 (PFAM);PF02373 (PFAM);PF05965 (PFAM);PF05964 (PFAM);PF02375 (PFAM);PTHR10694:SF41 (PANTHER);PTHR10694 (PANTHER);PS51543 (PROSITE_PROFILES);PS51184 (PROSITE_PROFILES);PS51542 (PROSITE_PROFILES);PS51183 (PROSITE_PROFILES);SSF51197 (SUPERFAMILY)	GO:0005634;GO:0005634;GO:0005634;GO:0005634;GO:0005634;GO:0005634	nucleus;nucleus;nucleus;nucleus;nucleus;nucleus	Cellular Component;Cellular Component;Cellular Component;Cellular Component;Cellular Component;Cellular Component	MS-DArT_site_10275,MS-DArT_site_10274	0,0
Eucgr.B02153	Chr02	40640345	40645146	-	PTHR13132 - ALPHA- 1,6 -FUCOSYLTRANSFERASE (1 of 3) & PREDICTED: uncharacterized protein LOC104432548	GO:0016021			PTHR13132 (PANTHER);PTHR13132:SF29 (PANTHER);CYTOPLASMIC_DOMAIN (PHOBIUS);TRANSMEMBRANE (PHOBIUS);TRANSMEMBRANE (PHOBIUS);NON_CYTOPLASMIC_DOMAIN (PHOBIUS);NON_CYTOPLASMIC_DOMAIN (PHOBIUS);TMhelix (TMHMM)				MS-DArT_site_10302	0
Eucgr.B02169	Chr02	40791049	40822647	+	K05749 - cytoplasmic FMR1 interacting protein (CYFIP) (1 of 1) & PIR				Coil (COILS);PR01698 (PRINTS);PIRSF008153 (PIRSF);PF07159 (PFAM);PF05994 (PFAM);PTHR12195 (PANTHER)				MS-DArT_site_10345	0
Eucgr.B02180	Chr02	40910323	40913994	+	K09839 - violaxanthin de-epoxidase (VDE, NPQ1) (1 of 1), & violaxanthin de- chloroplastic	GO:0055114, GO:0046422, GO:0009507 & GO:0015994 & GO:0009408 & GO:0031977 & GO:0009534 & GO:0010028 & GO:0046422 & GO:0055114 & GO:0006631	1.10.99.3	Violaxanthin de-epoxidase. & Acting on diphenols and related substances as donors	Coil (COILS);G3DSA:2.40.128.20 (GENE3D);PF07137 (PFAM);PTHR33970 (PANTHER);PTHR33970:SF1 (PANTHER);SSF50814 (SUPERFAMILY)	GO:0009507/GO:0046422/GO:0055114	chloroplast/violaxanthin de-epoxidase activity/oxidation-reduction process	Cellular Component/Molecular Function/Biological Process	MS-DArT_site_10361	0
Eucgr.B02209	Chr02	41308164	41318425	-	K17601 - WD repeat-containing protein 81 (WDR81) (1 of 1) & GFS12 isoform X1	GO:0006468, GO:0005524, GO:0004672 & GO:0005524 & GO:0009816 & GO:0004672 & GO:0006468 & GO:0006623 & GO:0005622			SM01026 (SMART);SM00320 (SMART);G3DSA:1.10.1540.10 (GENE3D);PF02138 (PFAM);G3DSA:1.10.510.10 (GENE3D);PF00400 (PFAM);G3DSA:1.25.10.10 (GENE3D);G3DSA:2.130.10.10 (GENE3D);PTHR13743 (PANTHER);PTHR13743:SF57 (PANTHER);PS00678 (PROSITE_PATTERNS);PS50082 (PROSITE_PROFILES);PS50011 (PROSITE_PROFILES);PS50197 (PROSITE_PROFILES);PS50294 (PROSITE_PROFILES);SSF50978 (SUPERFAMILY);SSF56112 (SUPERFAMILY);SSF…	GO:0005515;GO:0005515;GO:0005515;GO:0005515;GO:0006468/GO:0004672/GO:0005524;GO:0005515;GO:0005515	protein binding;protein binding;protein binding;protein binding;protein phosphorylation/protein kinase activity/ATP binding;protein binding;protein binding	Molecular Function;Molecular Function;Molecular Function;Molecular Function;Biological Process/Molecular Function/Molecular Function;Molecular Function;Molecular Function	MS-DArT_site_10408	0
Eucgr.B02210	Chr02	41321288	41324774	-	K15121 - solute carrier family 25, member 44 (SLC25A44) (1 of 3) & solute carrier family 25 member 44-like	GO:0055085 & GO:0003735 & GO:0016021 & GO:0006412			PR00926 (PRINTS);G3DSA:1.50.40.10 (GENE3D);PF00153 (PFAM);PTHR24089 (PANTHER);PTHR24089:SF296 (PANTHER);PS50920 (PROSITE_PROFILES);SSF103506 (SUPERFAMILY)	GO:0055085	transmembrane transport	Biological Process	MS-DArT_site_10411|MS-DArT_site_10412	0
Eucgr.B02221	Chr02	41399858	41403721	+	PTHR33405:SF1 - PROTEIN FLC EXPRESSOR (1 of 1) & FLC EXPRESSOR				Coil (COILS);Coil (COILS);Coil (COILS);PTHR33405 (PANTHER);PTHR33405:SF1 (PANTHER)				MS-DArT_site_10417	0
Eucgr.B02225	Chr02	41433780	41447281	-	K18270 - Rab3 GTPase-activating protein catalytic subunit (RAB3GAP1) (1 of 2) & rab3 GTPase-activating catalytic subunit isoform X1	GO:0005096 & GO:0009507 & GO:0043547			PF13890 (PFAM);PTHR21422:SF3 (PANTHER);PTHR21422 (PANTHER)	GO:0005096;GO:0005096	GTPase activator activity;GTPase activator activity	Molecular Function;Molecular Function	MS-DArT_site_10429	0
Eucgr.B02230	Chr02	41475493	41478523	-	pentatricopeptide repeat-containing chloroplastic				TIGR00756 (TIGRFAM);PTHR24015:SF683 (PANTHER);PTHR24015 (PANTHER);PS51375 (PROSITE_PROFILES)				MS-DArT_site_10438	0
Eucgr.B02240	Chr02	41587682	41591083	-	PTHR32285:SF14 - PROTEIN PMR5-RELATED (1 of 3) & PMR5-like	GO:0016021 & GO:0005794 & GO:0071554 & GO:0016413	2.3.1	Acyltransferases	PF14416 (PFAM);PF13839 (PFAM);PTHR32285:SF14 (PANTHER);PTHR32285 (PANTHER);SIGNAL_PEPTIDE_N_REGION (PHOBIUS);NON_CYTOPLASMIC_DOMAIN (PHOBIUS);SIGNAL_PEPTIDE_H_REGION (PHOBIUS);SIGNAL_PEPTIDE_C_REGION (PHOBIUS);SIGNAL_PEPTIDE (PHOBIUS);SignalP-noTM (SIGNALP_EUK)				MS-DArT_site_10465	0
Eucgr.B02246	Chr02	41619714	41622132	-	PTHR13544 - SELENOPROTEIN T (1 of 1), & selT	GO:0016021			G3DSA:3.40.30.10 (GENE3D);PF10262 (PFAM);TIGR02174 (TIGRFAM);PTHR13544 (PANTHER);PTHR13544:SF0 (PANTHER);NON_CYTOPLASMIC_DOMAIN (PHOBIUS);CYTOPLASMIC_DOMAIN (PHOBIUS);TRANSMEMBRANE (PHOBIUS);TRANSMEMBRANE (PHOBIUS);CYTOPLASMIC_DOMAIN (PHOBIUS);SSF52833 (SUPERFAMILY);TMhelix (TMHMM);TMhelix (TMHMM)				MS-DArT_site_10470	0
Eucgr.B02267	Chr02	41781309	41789397	-	K01657 - anthranilate synthase component I (trpE) (1 of 2) & anthranilate synthase alpha subunit chloroplastic-like	GO:0016833, GO:0009058 & GO:0009507 & GO:0000162 & GO:0004049	4.1.3.27	Anthranilate synthase. & Anthranilate synthase	PR00095 (PRINTS);TIGR00564 (TIGRFAM);G3DSA:3.60.120.10 (GENE3D);PF04715 (PFAM);PF00425 (PFAM);PTHR11236:SF20 (PANTHER);PTHR11236 (PANTHER);SignalP-TM (SIGNALP_GRAM_POSITIVE);SSF56322 (SUPERFAMILY)	GO:0009058;GO:0000162/GO:0004049;GO:0009058;GO:0016833/GO:0009058;GO:0009058	biosynthetic process;tryptophan biosynthetic process/anthranilate synthase activity;biosynthetic process;oxo-acid-lyase activity/biosynthetic process;biosynthetic process	Biological Process;Biological Process/Molecular Function;Biological Process;Molecular Function/Biological Process;Biological Process	MS-DArT_site_10509	0
Eucgr.B02279	Chr02	41869017	41890740	+	K12599 - antiviral helicase SKI2 (SKI2, SKIV2L) (1 of 1) & D -box ATP-dependent RNA helicase D 11 isoform X1	GO:0005524, GO:0003676 & GO:0005524 & GO:0003723 & GO:0003724 & GO:0006401	3.6.4.13 & 3.6.1 & 2.7.7 & 3.6.1.15	RNA helicase. & Acting on acid anhydrides & Transferring phosphorus-containing groups & Nucleoside-triphosphate phosphatase	Coil (COILS);SM01142 (SMART);SM00487 (SMART);PIRSF005198 (PIRSF);SM00490 (SMART);PF13234 (PFAM);G3DSA:3.40.50.300 (GENE3D);G3DSA:3.40.50.300 (GENE3D);PF08148 (PFAM);PF00270 (PFAM);PTHR12131 (PANTHER);PTHR12131:SF4 (PANTHER);PS51192 (PROSITE_PROFILES);PS51194 (PROSITE_PROFILES);SSF52540 (SUPERFAMILY)	GO:0003723/GO:0003724/GO:0006401;GO:0005524/GO:0003676	RNA binding/RNA helicase activity/RNA catabolic process;ATP binding/nucleic acid binding	Molecular Function/Molecular Function/Biological Process;Molecular Function/Molecular Function	MS-DArT_site_10538	0
Eucgr.B02283	Chr02	41912188	41916213	+	AT-rich interactive domain-containing 1A-like				PTHR37393 (PANTHER)				MS-DArT_site_10548	0
Eucgr.B02311	Chr02	42057270	42059124	-	low-temperature-induced 65 kDa				PTHR33836:SF2 (PANTHER);PTHR33836 (PANTHER)				MS-DArT_site_10574	0
Eucgr.B02314	Chr02	42076727	42083796	-	PTHR12537:SF78 - PUMILIO HOMOLOG 1-RELATED (1 of 2), & pumilio homolog 2-like	GO:0003723			Coil (COILS);Coil (COILS);SM00025 (SMART);G3DSA:1.25.10.10 (GENE3D);PF07990 (PFAM);PF00806 (PFAM);PTHR12537 (PANTHER);PTHR12537 (PANTHER);PTHR12537:SF78 (PANTHER);PS50302 (PROSITE_PROFILES);PS50303 (PROSITE_PROFILES);PS50302 (PROSITE_PROFILES);PS50302 (PROSITE_PROFILES);PS50302 (PROSITE_PROFILES);PS50302 (PROSITE_PROFILES);PS50302 (PROSITE_PROFILES);PS50302 (PROSITE_PROFILES);PS50302 (PROSITE_PRO…	GO:0003723;GO:0003723;GO:0003723;GO:0003723;GO:0003723;GO:0003723;GO:0003723;GO:0003723;GO:0003723;GO:0003723;GO:0003723;GO:0005488	RNA binding;RNA binding;RNA binding;RNA binding;RNA binding;RNA binding;RNA binding;RNA binding;RNA binding;RNA binding;RNA binding;binding	Molecular Function;Molecular Function;Molecular Function;Molecular Function;Molecular Function;Molecular Function;Molecular Function;Molecular Function;Molecular Function;Molecular Function;Molecular Function;Molecular Function	MS-DArT_site_10581	0
Eucgr.B02414	Chr02	42972781	42976660	+	PF12796//PF13962 - Ankyrin repeats (3 copies) (Ank_2) // Domain of unknown function (PGG) (1 of 116) & ankyrin repeat-containing At5g02620-like	GO:0016021			SM00248 (SMART);PF12796 (PFAM);G3DSA:1.25.40.20 (GENE3D);PF00023 (PFAM);PF13962 (PFAM);G3DSA:1.25.40.20 (GENE3D);PTHR24186 (PANTHER);PTHR24186:SF4 (PANTHER);TRANSMEMBRANE (PHOBIUS);NON_CYTOPLASMIC_DOMAIN (PHOBIUS);CYTOPLASMIC_DOMAIN (PHOBIUS);TRANSMEMBRANE (PHOBIUS);CYTOPLASMIC_DOMAIN (PHOBIUS);CYTOPLASMIC_DOMAIN (PHOBIUS);TRANSMEMBRANE (PHOBIUS);TRANSMEMBRANE (PHOBIUS);NON_CYTOPLASMIC_DOMAIN (PH…	GO:0005515;GO:0005515;GO:0005515;GO:0005515;GO:0005515;GO:0005515	protein binding;protein binding;protein binding;protein binding;protein binding;protein binding	Molecular Function;Molecular Function;Molecular Function;Molecular Function;Molecular Function;Molecular Function	MS-DArT_site_10745	0
Eucgr.B02421	Chr02	43165792	43166511	+	probable ribose-5-phosphate isomerase chloroplastic	GO:0009570 & GO:0009052 & GO:0009941 & GO:0004751 & GO:0009735 & GO:0009535	5.3.1.6	Ribose-5-phosphate isomerase					MS-DArT_site_10793	0
Eucgr.B02434	Chr02	43966106	43971983	-	K11671 - nuclear factor related to kappa-B-binding protein (NFRKB, INO80G) (1 of 1), & isoform 1	GO:0031011			PTHR13052:SF0 (PANTHER);PTHR13052 (PANTHER)	GO:0031011	Ino80 complex	Cellular Component	MS-DArT_site_10870,MS-DArT_site_10869	0,0
Eucgr.B02440	Chr02	43998199	44001050	-	BTB POZ domain-containing At5g60050				PTHR31060:SF12 (PANTHER);PTHR31060:SF12 (PANTHER);PTHR31060 (PANTHER);PTHR31060 (PANTHER)				MS-DArT_site_10879	0
Eucgr.B02454	Chr02	44590341	44600386	-	K10643 - CCR4-NOT transcription complex subunit 4 (CNOT4, NOT4, MOT2) (1 of 2), & general negative regulator of transcription subunit 4 isoform X1	GO:0000166 & GO:0008270 & GO:0003723			SM00360 (SMART);SM00361 (SMART);PF00076 (PFAM);G3DSA:3.30.40.10 (GENE3D);PF14570 (PFAM);G3DSA:3.30.70.330 (GENE3D);PTHR12603:SF3 (PANTHER);PTHR12603 (PANTHER);SIGNAL_PEPTIDE (PHOBIUS);NON_CYTOPLASMIC_DOMAIN (PHOBIUS);SIGNAL_PEPTIDE_C_REGION (PHOBIUS);SIGNAL_PEPTIDE_N_REGION (PHOBIUS);SIGNAL_PEPTIDE_H_REGION (PHOBIUS);PS50089 (PROSITE_PROFILES);PS50102 (PROSITE_PROFILES);SSF54928 (SUPERFAMILY);SSF…	GO:0003676;GO:0003676;GO:0003676;GO:0000166;GO:0008270/GO:0005515;GO:0003676;GO:0000166	nucleic acid binding;nucleic acid binding;nucleic acid binding;nucleotide binding;zinc ion binding/protein binding;nucleic acid binding;nucleotide binding	Molecular Function;Molecular Function;Molecular Function;Molecular Function;Molecular Function/Molecular Function;Molecular Function;Molecular Function	MS-DArT_site_10934	0
Eucgr.B02460	Chr02	44661524	44666804	-	interactor of constitutive active ROPs 3	GO:0005886			Coil (COILS);Coil (COILS);Coil (COILS);Coil (COILS);Coil (COILS);Coil (COILS);Coil (COILS);PTHR34224 (PANTHER);PTHR34224:SF4 (PANTHER)				MS-DArT_site_10944|MS-DArT_site_10945	0
Eucgr.B02466	Chr02	44724234	44727850	+	PTHR11685:SF107 - C3H4 TYPE ZINC FINGER PROTEIN-RELATED (1 of 2) & E3 ubiquitin- ligase rbrA	GO:0016567, GO:0004842 & GO:0003676 & GO:0004842 & GO:0008270 & GO:0016567	6.3.2.19	Ubiquitin--protein ligase.	SM00647 (SMART);PF01485 (PFAM);PF13456 (PFAM);G3DSA:3.30.40.10 (GENE3D);PTHR11685:SF107 (PANTHER);PTHR11685 (PANTHER);PS00518 (PROSITE_PATTERNS);SIGNAL_PEPTIDE_C_REGION (PHOBIUS);SIGNAL_PEPTIDE_H_REGION (PHOBIUS);SIGNAL_PEPTIDE_N_REGION (PHOBIUS);NON_CYTOPLASMIC_DOMAIN (PHOBIUS);SIGNAL_PEPTIDE (PHOBIUS);PS50089 (PROSITE_PROFILES);SSF57850 (SUPERFAMILY);SSF57850 (SUPERFAMILY);SSF57850 (SUPERFAMILY…	GO:0016567/GO:0004842;GO:0005515/GO:0008270;GO:0003676	protein ubiquitination/ubiquitin-protein transferase activity;protein binding/zinc ion binding;nucleic acid binding	Biological Process/Molecular Function;Molecular Function/Molecular Function;Molecular Function	MS-DArT_site_10954	0
Eucgr.B02467	Chr02	44739812	44761370	+	3.1.4.37 - 2',3'-cyclic-nucleotide 3'-phosphodiesterase / Cyclic-CMP phosphodiesterase (1 of 1) & RNAligase isoform 1	GO:0006388, GO:0005524, GO:0003972 & GO:0005524 & GO:0051731 & GO:0006388 & GO:0016310 & GO:0004113 & GO:0003972	3.1.4.37 & 3.1.4 & 2.7.1 & 6.5.1.3 & 3.1 & 6.5.1	2',3'-cyclic-nucleotide 3'-phosphodiesterase. & Acting on ester bonds & Transferring phosphorus-containing groups & RNA ligase (ATP) & 2',3'-cyclic-nucleotide 3'-phosphodiesterase & Forming phosphoric ester bonds	PF08302 (PFAM);PTHR35460 (PANTHER);PTHR35460:SF1 (PANTHER)	GO:0003972/GO:0006388/GO:0005524	RNA ligase (ATP) activity/tRNA splicing, via endonucleolytic cleavage and ligation/ATP binding	Molecular Function/Biological Process/Molecular Function	MS-DArT_site_10958	0
Eucgr.B02478	Chr02	44849971	44861366	+	KOG2169 - Zn-finger transcription factor (1 of 1) & E3 SUMO- ligase SIZ1 isoform X1	GO:0005515, GO:0008270, GO:0031668, GO:0019789, GO:0016925, GO:0016049, GO:0005634 & GO:0005634 & GO:0003677 & GO:0008270 & GO:0031668 & GO:0016925 & GO:0016874 & GO:0016049 & GO:0019789			SM00249 (SMART);SM00513 (SMART);G3DSA:3.30.40.10 (GENE3D);PF00628 (PFAM);PF02037 (PFAM);G3DSA:3.30.40.10 (GENE3D);PF02891 (PFAM);G3DSA:1.10.720.30 (GENE3D);PTHR10782 (PANTHER);PTHR10782:SF34 (PANTHER);PS01359 (PROSITE_PATTERNS);PS51044 (PROSITE_PROFILES);PS50800 (PROSITE_PROFILES);SSF68906 (SUPERFAMILY);SSF57903 (SUPERFAMILY)	GO:0005515/GO:0008270;GO:0005515;GO:0008270;GO:0016049/GO:0016925/GO:0005634/GO:0019789/GO:0031668;GO:0008270	protein binding/zinc ion binding;protein binding;zinc ion binding;cell growth/protein sumoylation/nucleus/SUMO transferase activity/cellular response to extracellular stimulus;zinc ion binding	Molecular Function/Molecular Function;Molecular Function;Molecular Function;Biological Process/Biological Process/Cellular Component/Molecular Function/Biological Process;Molecular Function	MS-DArT_site_10966	0
Eucgr.B02491	Chr02	44962385	44966170	+	K07359 - calcium/calmodulin-dependent protein kinase kinase (CAMKK) (1 of 1) & serine threonine- kinase GRIK1 isoform X1	GO:0005524 & GO:0004683 & GO:0006468	2.7.11.1 & 2.7.11 & 2.7.11.17	Non-specific serine/threonine protein kinase. & Transferring phosphorus-containing groups & Calcium/calmodulin-dependent protein kinase	SM00220 (SMART);G3DSA:3.30.200.20 (GENE3D);G3DSA:1.10.510.10 (GENE3D);PF00069 (PFAM);PTHR24347 (PANTHER);PTHR24347:SF1 (PANTHER);PS00107 (PROSITE_PATTERNS);PS00108 (PROSITE_PATTERNS);PS50011 (PROSITE_PROFILES);SSF56112 (SUPERFAMILY)	GO:0004672/GO:0005524/GO:0006468;GO:0004672/GO:0005524/GO:0006468;GO:0005524;GO:0006468/GO:0004672;GO:0004672/GO:0005524/GO:0006468	protein kinase activity/ATP binding/protein phosphorylation;protein kinase activity/ATP binding/protein phosphorylation;ATP binding;protein phosphorylation/protein kinase activity;protein kinase activity/ATP binding/protein phosphorylation	Molecular Function/Molecular Function/Biological Process;Molecular Function/Molecular Function/Biological Process;Molecular Function;Biological Process/Molecular Function;Molecular Function/Molecular Function/Biological Process	MS-DArT_site_11000,MS-DArT_site_11001	0,0
Eucgr.B02495	Chr02	44987543	44993685	+	1.17.7.1 - (E)-4-hydroxy-3-methylbut-2-enyl-diphosphate synthase (ferredoxin) / 4-hydroxy-3-methylbut-2-en-1-yl diphosphate synthase (1 of 1) & 4-hydroxy-3-methylbut-2-en-1-yl diphosphate synthase (ferredoxin) chloroplastic	GO:0055114, GO:0046429, GO:0016114 & GO:0009570 & GO:0009617 & GO:0003725 & GO:0005506 & GO:0009941 & GO:0019288 & GO:0009862 & GO:0055114 & GO:0051539 & GO:0046429 & GO:0016114	1.17.7.1 & 1.17.7	(E)-4-hydroxy-3-methylbut-2-enyl-diphosphate synthase. & (E)-4-hydroxy-3-methylbut-2-enyl-diphosphate synthase (ferredoxin) & Acting on CH or CH(2) groups	PIRSF037336 (PIRSF);TIGR00612 (TIGRFAM);PF04551 (PFAM);PTHR30454 (PANTHER);MF_00159 (HAMAP);SSF56014 (SUPERFAMILY)	GO:0046429/GO:0055114/GO:0008299/GO:0005506;GO:0016114/GO:0046429/GO:0055114;GO:0016114/GO:0046429/GO:0055114;GO:0016114/GO:0046429/GO:0055114	4-hydroxy-3-methylbut-2-en-1-yl diphosphate synthase activity/oxidation-reduction process/isoprenoid biosynthetic process/iron ion binding;terpenoid biosynthetic process/4-hydroxy-3-methylbut-2-en-1-yl diphosphate synthase activity/oxidation-reduction process;terpenoid biosynthetic process/4-hydroxy-3-methylbut-2-en-1-yl diphosphate synthase activity/oxidation-reduction process;terpenoid biosynth…	Molecular Function/Biological Process/Biological Process/Molecular Function;Biological Process/Molecular Function/Biological Process;Biological Process/Molecular Function/Biological Process;Biological Process/Molecular Function/Biological Process	MS-DArT_site_11011,MS-DArT_site_11010,MS-DArT_site_11012|MS-DArT_site_11013	0,0,0
Eucgr.B02503	Chr02	45054726	45059166	+	PTHR10910//PTHR10910:SF94 - EUKARYOTE SPECIFIC DSRNA BINDING PROTEIN // SUBFAMILY NOT NAMED (1 of 2) & double-stranded RNA-binding 2	GO:0070918 & GO:0051172 & GO:2000113 & GO:0080090 & GO:0040029			SM00358 (SMART);G3DSA:3.30.160.20 (GENE3D);PF00035 (PFAM);PTHR10910 (PANTHER);PTHR10910:SF94 (PANTHER);PS50137 (PROSITE_PROFILES);SSF54768 (SUPERFAMILY)				MS-DArT_site_11018	0
Eucgr.B02504	Chr02	45069758	45076408	+	PF08670 - MEKHLA domain (MEKHLA) (1 of 4) & homeobox-leucine zipper REVOLUTA	GO:0003677, GO:0008289 & GO:0005634 & GO:0010051 & GO:0044212 & GO:0030154 & GO:0008289 & GO:0009956 & GO:0009944 & GO:0010089 & GO:0009855 & GO:0010014			Coil (COILS);SM00389 (SMART);SM00234 (SMART);PF00046 (PFAM);PF08670 (PFAM);G3DSA:3.30.530.20 (GENE3D);G3DSA:1.10.10.60 (GENE3D);PF01852 (PFAM);PTHR24326 (PANTHER);PTHR24326:SF279 (PANTHER);PS50071 (PROSITE_PROFILES);PS50848 (PROSITE_PROFILES);SSF46689 (SUPERFAMILY);SSF55961 (SUPERFAMILY)	GO:0003677;GO:0008289;GO:0003677;GO:0003677;GO:0008289;GO:0003677;GO:0008289;GO:0003677	DNA binding;lipid binding;DNA binding;DNA binding;lipid binding;DNA binding;lipid binding;DNA binding	Molecular Function;Molecular Function;Molecular Function;Molecular Function;Molecular Function;Molecular Function;Molecular Function;Molecular Function	MS-DArT_site_11019	0
Eucgr.B02509	Chr02	45125343	45133412	-	PTHR12136:SF41 - PLECKSTRIN HOMOLOGY (PH) AND LIPID-BINDING START DOMAIN-CONTAINING PROTEIN (1 of 1), & ENHANCED DISEASE RESISTANCE 2 isoform X1	GO:0008289 & GO:0005886			SM00234 (SMART);SM00233 (SMART);G3DSA:2.30.29.30 (GENE3D);G3DSA:3.30.530.20 (GENE3D);PF00169 (PFAM);PF01852 (PFAM);PF07059 (PFAM);PTHR12136:SF41 (PANTHER);PTHR12136 (PANTHER);PS50003 (PROSITE_PROFILES);PS50848 (PROSITE_PROFILES);SSF55961 (SUPERFAMILY);SSF50729 (SUPERFAMILY)	GO:0008289;GO:0008289;GO:0008289	lipid binding;lipid binding;lipid binding	Molecular Function;Molecular Function;Molecular Function	MS-DArT_site_11031	0
Eucgr.B02532	Chr02	45327381	45331724	+	PTHR11353:SF11 - CHAPERONIN 60 SUBUNIT ALPHA 1, CHLOROPLASTIC (1 of 1), & ru large subunit-binding subunit alpha	GO:0005524 & GO:0009570 & GO:0022626 & GO:0009793 & GO:0005739 & GO:0016020 & GO:0048046 & GO:0009941 & GO:0042026 & GO:0009658 & GO:0009579			Coil (COILS);PR00298 (PRINTS);G3DSA:1.10.560.10 (GENE3D);G3DSA:3.50.7.10 (GENE3D);PF00118 (PFAM);G3DSA:1.10.560.10 (GENE3D);TIGR02348 (TIGRFAM);PTHR11353:SF11 (PANTHER);PTHR11353 (PANTHER);PS00296 (PROSITE_PATTERNS);MF_00600 (HAMAP);SSF54849 (SUPERFAMILY);SSF48592 (SUPERFAMILY);SSF52029 (SUPERFAMILY);SSF54849 (SUPERFAMILY)	GO:0005737/GO:0042026;GO:0005524;GO:0005737/GO:0042026;GO:0005737/GO:0005524/GO:0006457;GO:0005737/GO:0042026	cytoplasm/protein refolding;ATP binding;cytoplasm/protein refolding;cytoplasm/ATP binding/protein folding;cytoplasm/protein refolding	Cellular Component/Biological Process;Molecular Function;Cellular Component/Biological Process;Cellular Component/Molecular Function/Biological Process;Cellular Component/Biological Process	MS-DArT_site_11084	0
Eucgr.B02534	Chr02	45369152	45373919	+	PF13207 - AAA domain (AAA_17) (1 of 5) & P-loop NTPase domain-containing LPA1 homolog 1	GO:0016310 & GO:0016301 & GO:0016787			G3DSA:3.40.50.300 (GENE3D);PTHR33477 (PANTHER);PTHR33477:SF1 (PANTHER);SSF52540 (SUPERFAMILY)				MS-DArT_site_11089	0
Eucgr.B02536	Chr02	45397307	45404224	+	PTHR19241:SF200 - ABC TRANSPORTER G FAMILY MEMBER 3 (1 of 1) & ABC transporter G family member 3	GO:0016887, GO:0005524, GO:0016020 & GO:0015423 & GO:0005524 & GO:0055085 & GO:0016021 & GO:0015768 & GO:0005886	3.6.3.25 & 3.6.1 & 3.6.1.3 & 3.6.3.19 & 3.6.1.15 & 3.6.3.18	Sulfate-transporting ATPase. & Acting on acid anhydrides & Adenosinetriphosphatase & Maltose-transporting ATPase & Nucleoside-triphosphate phosphatase & Oligosaccharide-transporting ATPase	SM00382 (SMART);PF01061 (PFAM);PF00005 (PFAM);G3DSA:3.40.50.300 (GENE3D);PTHR19241 (PANTHER);PTHR19241:SF200 (PANTHER);TRANSMEMBRANE (PHOBIUS);TRANSMEMBRANE (PHOBIUS);NON_CYTOPLASMIC_DOMAIN (PHOBIUS);NON_CYTOPLASMIC_DOMAIN (PHOBIUS);NON_CYTOPLASMIC_DOMAIN (PHOBIUS);CYTOPLASMIC_DOMAIN (PHOBIUS);TRANSMEMBRANE (PHOBIUS);TRANSMEMBRANE (PHOBIUS);TRANSMEMBRANE (PHOBIUS);TRANSMEMBRANE (PHOBIUS);NON_CYTO…	GO:0016020;GO:0016887/GO:0005524;GO:0016887/GO:0005524	membrane;ATPase activity/ATP binding;ATPase activity/ATP binding	Cellular Component;Molecular Function/Molecular Function;Molecular Function/Molecular Function	MS-DArT_site_11097	0
Eucgr.B02538	Chr02	45411073	45415505	+	2.7.1.108 - Dolichol kinase (1 of 1) & dolichol kinase EVAN	GO:0016779 & GO:0016021 & GO:0016310 & GO:0016301	2.7.1.108	Dolichol kinase.	PTHR13205 (PANTHER);PTHR13205:SF15 (PANTHER);SIGNAL_PEPTIDE (PHOBIUS);NON_CYTOPLASMIC_DOMAIN (PHOBIUS);TRANSMEMBRANE (PHOBIUS);SIGNAL_PEPTIDE_N_REGION (PHOBIUS);TRANSMEMBRANE (PHOBIUS);CYTOPLASMIC_DOMAIN (PHOBIUS);TRANSMEMBRANE (PHOBIUS);CYTOPLASMIC_DOMAIN (PHOBIUS);TRANSMEMBRANE (PHOBIUS);SIGNAL_PEPTIDE_C_REGION (PHOBIUS);TRANSMEMBRANE (PHOBIUS);CYTOPLASMIC_DOMAIN (PHOBIUS);TRANSMEMBRANE (PHOBIU…				MS-DArT_site_11105	0
Eucgr.B02547	Chr02	45489416	45493043	+	K04733 - interleukin-1 receptor-associated kinase 4 (IRAK4) (1 of 57) & serine threonine- kinase PBS1	GO:0006468, GO:0005524, GO:0004672 & GO:0005524 & GO:0000165 & GO:0000186 & GO:0004709 & GO:0005622	2.7.11.1 & 2.7.11.25 & 2.7.11	Non-specific serine/threonine protein kinase. & Mitogen-activated protein kinase kinase kinase & Transferring phosphorus-containing groups	G3DSA:3.30.200.20 (GENE3D);PF00069 (PFAM);G3DSA:2.60.120.200 (GENE3D);G3DSA:1.10.510.10 (GENE3D);PTHR27001 (PANTHER);PTHR27001:SF150 (PANTHER);PS00108 (PROSITE_PATTERNS);PS00107 (PROSITE_PATTERNS);PS50011 (PROSITE_PROFILES);SSF56112 (SUPERFAMILY)	GO:0005524/GO:0004672/GO:0006468;GO:0006468/GO:0004672;GO:0005524;GO:0005524/GO:0004672/GO:0006468	ATP binding/protein kinase activity/protein phosphorylation;protein phosphorylation/protein kinase activity;ATP binding;ATP binding/protein kinase activity/protein phosphorylation	Molecular Function/Molecular Function/Biological Process;Biological Process/Molecular Function;Molecular Function;Molecular Function/Molecular Function/Biological Process	MS-DArT_site_11129	0
Eucgr.B02582	Chr02	45822040	45824226	+	PTHR35474:SF2 - SERINE-ARGININE-ASPARTATE-RICH PROTEIN SHW1 (1 of 1) & PREDICTED: uncharacterized protein LOC104432944	GO:0005634 & GO:0016021 & GO:0010100			PTHR35474:SF2 (PANTHER);PTHR35474 (PANTHER);TRANSMEMBRANE (PHOBIUS);NON_CYTOPLASMIC_DOMAIN (PHOBIUS);TRANSMEMBRANE (PHOBIUS);CYTOPLASMIC_DOMAIN (PHOBIUS);CYTOPLASMIC_DOMAIN (PHOBIUS);TMhelix (TMHMM)				MS-DArT_site_11192	0
Eucgr.B02594	Chr02	45919257	45938468	-	PTHR13803:SF4 - SEC24 (1 of 1) & transport Sec24-like At4g32640	GO:0030127, GO:0008270, GO:0006888, GO:0006886 & GO:0008270 & GO:0006888 & GO:0006886 & GO:0030127			PF00626 (PFAM);G3DSA:3.40.20.10 (GENE3D);G3DSA:3.40.50.410 (GENE3D);PF04815 (PFAM);PF04810 (PFAM);PF08033 (PFAM);PF04811 (PFAM);PTHR13803 (PANTHER);PTHR13803:SF4 (PANTHER);SSF53300 (SUPERFAMILY);SSF81811 (SUPERFAMILY);SSF82919 (SUPERFAMILY);SSF81995 (SUPERFAMILY);SSF82754 (SUPERFAMILY)	GO:0006888/GO:0006886/GO:0030127;GO:0006888/GO:0030127/GO:0006886/GO:0008270;GO:0006888/GO:0030127/GO:0006886;GO:0006888/GO:0006886/GO:0030127;GO:0006888/GO:0030127/GO:0006886/GO:0008270	ER to Golgi vesicle-mediated transport/intracellular protein transport/COPII vesicle coat;ER to Golgi vesicle-mediated transport/COPII vesicle coat/intracellular protein transport/zinc ion binding;ER to Golgi vesicle-mediated transport/COPII vesicle coat/intracellular protein transport;ER to Golgi vesicle-mediated transport/intracellular protein transport/COPII vesicle coat;ER to Golgi vesicle-me…	Biological Process/Biological Process/Cellular Component;Biological Process/Cellular Component/Biological Process/Molecular Function;Biological Process/Cellular Component/Biological Process;Biological Process/Biological Process/Cellular Component;Biological Process/Cellular Component/Biological Process/Molecular Function	MS-DArT_site_11220,MS-DArT_site_11221	0,0
Eucgr.B02596	Chr02	45944386	45948890	+	PF10280 - Mediator complex protein (Med11) (1 of 2) & mediator of RNA polymerase II transcription subunit 11	GO:0016592, GO:0006357, GO:0001104 & GO:0016592 & GO:0016021 & GO:0001104 & GO:0006357			PF10280 (PFAM);PTHR22890 (PANTHER)	GO:0006357/GO:0016592/GO:0001104	regulation of transcription from RNA polymerase II promoter/mediator complex/RNA polymerase II transcription cofactor activity	Biological Process/Cellular Component/Molecular Function	MS-DArT_site_11223	0
Eucgr.B02599	Chr02	45952579	45957934	-	PTHR33432:SF3 - EMSY N TERMINUS AND PLANT TUDOR-LIKE DOMAIN-CONTAINING PROTEIN (1 of 2) & EMSY-LIKE 3-like isoform X1				Coil (COILS);Coil (COILS);SM01191 (SMART);SM00743 (SMART);PF03735 (PFAM);PTHR33432 (PANTHER);PTHR33432:SF3 (PANTHER);PS51138 (PROSITE_PROFILES);SSF63748 (SUPERFAMILY);SSF158639 (SUPERFAMILY)	GO:0050832	defense response to fungus	Biological Process	MS-DArT_site_11225	0
Eucgr.B02610	Chr02	46049044	46054440	-	6.3.4.3 - Formate--tetrahydrofolate ligase / Tetrahydrofolic formylase (1 of 1) & formate--tetrahydrofolate ligase	GO:0009396, GO:0005524, GO:0004329 & GO:0005524 & GO:0004329 & GO:0009396 & GO:0035999	6.3.4.3	Formate--tetrahydrofolate ligase. & Formate--tetrahydrofolate ligase	G3DSA:3.30.1510.10 (GENE3D);G3DSA:3.10.410.10 (GENE3D);PF01268 (PFAM);G3DSA:3.40.50.300 (GENE3D);PTHR10025 (PANTHER);PS00721 (PROSITE_PATTERNS);PS00722 (PROSITE_PATTERNS);MF_01543 (HAMAP);SSF52540 (SUPERFAMILY)	GO:0009396/GO:0005524/GO:0004329;GO:0004329/GO:0005524/GO:0009396;GO:0004329/GO:0005524/GO:0009396;GO:0009396/GO:0005524/GO:0004329	folic acid-containing compound biosynthetic process/ATP binding/formate-tetrahydrofolate ligase activity;formate-tetrahydrofolate ligase activity/ATP binding/folic acid-containing compound biosynthetic process;formate-tetrahydrofolate ligase activity/ATP binding/folic acid-containing compound biosynthetic process;folic acid-containing compound biosynthetic process/ATP binding/formate-tetrahydrofo…	Biological Process/Molecular Function/Molecular Function;Molecular Function/Molecular Function/Biological Process;Molecular Function/Molecular Function/Biological Process;Biological Process/Molecular Function/Molecular Function	MS-DArT_site_11239	0
Eucgr.B02615	Chr02	46078768	46084840	+	PTHR10629:SF28 - DNA (CYTOSINE-5)-METHYLTRANSFERASE CMT3 (1 of 1) & DNA (cytosine-5)-methyltransferase CMT3	GO:0005634 & GO:0003886 & GO:0090116 & GO:0003682	2.1.1.37 & 2.1.1	DNA (cytosine-5-)-methyltransferase. & DNA (cytosine-5-)-methyltransferase & Transferring one-carbon groups	PR00105 (PRINTS);SM00298 (SMART);PF00145 (PFAM);PF00385 (PFAM);G3DSA:3.40.50.150 (GENE3D);G3DSA:3.90.120.10 (GENE3D);G3DSA:2.40.50.40 (GENE3D);PTHR10629 (PANTHER);PTHR10629:SF28 (PANTHER);PS50013 (PROSITE_PROFILES);PS51679 (PROSITE_PROFILES);SSF54160 (SUPERFAMILY);SSF53335 (SUPERFAMILY)	GO:0008168;GO:0008168	methyltransferase activity;methyltransferase activity	Molecular Function;Molecular Function	MS-DArT_site_11246,MS-DArT_site_11247	0,0
Eucgr.B02622	Chr02	46119759	46127236	-	PTHR23322:SF6 - UBX DOMAIN-CONTAINING PROTEIN 7 (1 of 1) & plant UBX domain-containing 7 isoform X2	GO:0005515			SM00594 (SMART);PIRSF037991 (PIRSF);G3DSA:3.40.30.10 (GENE3D);PF14555 (PFAM);G3DSA:3.10.20.90 (GENE3D);G3DSA:1.10.8.10 (GENE3D);PF00789 (PFAM);PF13899 (PFAM);PTHR23322 (PANTHER);PTHR23322:SF6 (PANTHER);PS50033 (PROSITE_PROFILES);PS50330 (PROSITE_PROFILES);SSF52833 (SUPERFAMILY);SSF46934 (SUPERFAMILY);SSF54236 (SUPERFAMILY)	GO:0005515;GO:0005515;GO:0005515	protein binding;protein binding;protein binding	Molecular Function;Molecular Function;Molecular Function	MS-DArT_site_11252|MS-DArT_site_11253	0
Eucgr.B02629	Chr02	46229753	46235956	-	PTHR11654//PTHR11654:SF153 - OLIGOPEPTIDE TRANSPORTER-RELATED // SUBFAMILY NOT NAMED (1 of 3) & NRT1 PTR FAMILY -like	GO:0016020, GO:0006810, GO:0005215 & GO:0006857 & GO:0016021 & GO:0005215			G3DSA:1.20.1250.20 (GENE3D);PF00854 (PFAM);PTHR11654:SF153 (PANTHER);PTHR11654 (PANTHER);PS01023 (PROSITE_PATTERNS);TRANSMEMBRANE (PHOBIUS);TRANSMEMBRANE (PHOBIUS);TRANSMEMBRANE (PHOBIUS);TRANSMEMBRANE (PHOBIUS);NON_CYTOPLASMIC_DOMAIN (PHOBIUS);TRANSMEMBRANE (PHOBIUS);NON_CYTOPLASMIC_DOMAIN (PHOBIUS);CYTOPLASMIC_DOMAIN (PHOBIUS);TRANSMEMBRANE (PHOBIUS);NON_CYTOPLASMIC_DOMAIN (PHOBIUS);TRANSMEMBRA…	GO:0005215/GO:0016020/GO:0006810;GO:0005215/GO:0016020/GO:0006810;GO:0006857/GO:0005215/GO:0016020	transporter activity/membrane/transport;transporter activity/membrane/transport;oligopeptide transport/transporter activity/membrane	Molecular Function/Cellular Component/Biological Process;Molecular Function/Cellular Component/Biological Process;Biological Process/Molecular Function/Cellular Component	MS-DArT_site_11274,MS-DArT_site_11272	0,0
Eucgr.B02630	Chr02	46237521	46244731	-	PTHR11654//PTHR11654:SF153 - OLIGOPEPTIDE TRANSPORTER-RELATED // SUBFAMILY NOT NAMED (1 of 3) & NRT1 PTR FAMILY -like	GO:0016020, GO:0006810, GO:0005215 & GO:0016021 & GO:0006810 & GO:0005215			PF00854 (PFAM);PTHR11654:SF153 (PANTHER);PTHR11654 (PANTHER);TRANSMEMBRANE (PHOBIUS);TRANSMEMBRANE (PHOBIUS);CYTOPLASMIC_DOMAIN (PHOBIUS);TRANSMEMBRANE (PHOBIUS);NON_CYTOPLASMIC_DOMAIN (PHOBIUS);CYTOPLASMIC_DOMAIN (PHOBIUS);NON_CYTOPLASMIC_DOMAIN (PHOBIUS);TMhelix (TMHMM);TMhelix (TMHMM);TMhelix (TMHMM)	GO:0005215/GO:0006810/GO:0016020;GO:0005215/GO:0006810/GO:0016020	transporter activity/transport/membrane;transporter activity/transport/membrane	Molecular Function/Biological Process/Cellular Component;Molecular Function/Biological Process/Cellular Component	MS-DArT_site_11275	0
Eucgr.B02635	Chr02	46302193	46309839	-	PTHR10110:SF86 - SODIUM/HYDROGEN EXCHANGER 7-RELATED (1 of 2) & sodium hydrogen exchanger 8-like isoform X1	GO:0016021, GO:0015299, GO:0006812 & GO:0015299 & GO:0016021 & GO:1902600			Coil (COILS);G3DSA:2.60.120.10 (GENE3D);PTHR10110 (PANTHER);PTHR10110:SF86 (PANTHER);NON_CYTOPLASMIC_DOMAIN (PHOBIUS);TRANSMEMBRANE (PHOBIUS);SIGNAL_PEPTIDE_C_REGION (PHOBIUS);SIGNAL_PEPTIDE_N_REGION (PHOBIUS);SIGNAL_PEPTIDE_H_REGION (PHOBIUS);CYTOPLASMIC_DOMAIN (PHOBIUS);SIGNAL_PEPTIDE (PHOBIUS);SSF51206 (SUPERFAMILY);TMhelix (TMHMM)	GO:0015299/GO:0006812/GO:0016021	solute:proton antiporter activity/cation transport/integral component of membrane	Molecular Function/Biological Process/Cellular Component	MS-DArT_site_11282|MS-DArT_site_11283	0
Eucgr.B02648	Chr02	46475969	46479370	+	PTHR27000:SF5 - SERINE/THREONINE-PROTEIN KINASE BRI1-LIKE 2 (1 of 2) & serine threonine- kinase BRI1-like 2	GO:0005515, GO:0006468, GO:0005524, GO:0004672 & GO:0005524 & GO:0032440 & GO:0016021 & GO:0055114 & GO:0004674 & GO:0006468	2.7.11.1 & 2.7.11 & 1.3.1.74	Non-specific serine/threonine protein kinase. & Transferring phosphorus-containing groups & 2-alkenal reductase (NAD(P)(+))	SM00369 (SMART);SM00220 (SMART);PF08263 (PFAM);PF00069 (PFAM);G3DSA:1.10.510.10 (GENE3D);G3DSA:2.60.120.200 (GENE3D);G3DSA:3.80.10.10 (GENE3D);PF13855 (PFAM);G3DSA:3.30.200.20 (GENE3D);PTHR27000:SF5 (PANTHER);PTHR27000 (PANTHER);PS00107 (PROSITE_PATTERNS);PS00108 (PROSITE_PATTERNS);SIGNAL_PEPTIDE (PHOBIUS);SIGNAL_PEPTIDE_N_REGION (PHOBIUS);NON_CYTOPLASMIC_DOMAIN (PHOBIUS);CYTOPLASMIC_DOMAIN (PHOB…	GO:0004672/GO:0005524/GO:0006468;GO:0004672/GO:0005524/GO:0006468;GO:0005515;GO:0005524;GO:0004672/GO:0006468;GO:0004672/GO:0005524/GO:0006468	protein kinase activity/ATP binding/protein phosphorylation;protein kinase activity/ATP binding/protein phosphorylation;protein binding;ATP binding;protein kinase activity/protein phosphorylation;protein kinase activity/ATP binding/protein phosphorylation	Molecular Function/Molecular Function/Biological Process;Molecular Function/Molecular Function/Biological Process;Molecular Function;Molecular Function;Molecular Function/Biological Process;Molecular Function/Molecular Function/Biological Process	MS-DArT_site_11299	0
Eucgr.B02699	Chr02	46790424	46795504	+	PTHR27001:SF164 - RECEPTOR PROTEIN KINASE TMK1-RELATED (1 of 3) & receptor kinase TMK1-like	GO:0005515, GO:0006468, GO:0005524, GO:0004672 & GO:0005524 & GO:0016021 & GO:0007178 & GO:0006468 & GO:0005886 & GO:0004675	2.7.11.1 & 2.7.11	Non-specific serine/threonine protein kinase. & Transferring phosphorus-containing groups	SM00369 (SMART);SM00220 (SMART);PF08263 (PFAM);PF00069 (PFAM);G3DSA:3.30.200.20 (GENE3D);G3DSA:3.80.10.10 (GENE3D);PF13855 (PFAM);G3DSA:1.10.510.10 (GENE3D);G3DSA:2.60.120.200 (GENE3D);PTHR27001 (PANTHER);PTHR27001:SF164 (PANTHER);PS00107 (PROSITE_PATTERNS);PS00108 (PROSITE_PATTERNS);SIGNAL_PEPTIDE_H_REGION (PHOBIUS);TRANSMEMBRANE (PHOBIUS);NON_CYTOPLASMIC_DOMAIN (PHOBIUS);SIGNAL_PEPTIDE_C_REGION…	GO:0005524/GO:0006468/GO:0004672;GO:0005524/GO:0006468/GO:0004672;GO:0005515;GO:0005524;GO:0004672/GO:0006468;GO:0005524/GO:0006468/GO:0004672	ATP binding/protein phosphorylation/protein kinase activity;ATP binding/protein phosphorylation/protein kinase activity;protein binding;ATP binding;protein kinase activity/protein phosphorylation;ATP binding/protein phosphorylation/protein kinase activity	Molecular Function/Biological Process/Molecular Function;Molecular Function/Biological Process/Molecular Function;Molecular Function;Molecular Function;Molecular Function/Biological Process;Molecular Function/Biological Process/Molecular Function	MS-DArT_site_11333	0
Eucgr.B02697	Chr02	46835146	46858574	+	K12879 - THO complex subunit 2 (THOC2) (1 of 1), & THO complex subunit 2				Coil (COILS);PF11732 (PFAM);PF16134 (PFAM);PF11262 (PFAM);PTHR21597:SF0 (PANTHER);PTHR21597 (PANTHER)				MS-DArT_site_11335|MS-DArT_site_11336,MS-DArT_site_11334,MS-DArT_site_11337	0,0,0
Eucgr.B02936	Chr02	48309309	48316543	-	PTHR23315:SF90 - ARMADILLO/BETA-CATENIN-LIKE REPEAT-CONTAINING PROTEIN (1 of 1), & U-box domain-containing 4	GO:0009570 & GO:0005634			SM00185 (SMART);G3DSA:1.25.10.10 (GENE3D);PTHR23315:SF90 (PANTHER);PTHR23315 (PANTHER);PS50077 (PROSITE_PROFILES);PS50176 (PROSITE_PROFILES);SSF48371 (SUPERFAMILY);SSF48371 (SUPERFAMILY)	GO:0005515;GO:0005515;GO:0005488;GO:0005488	protein binding;protein binding;binding;binding	Molecular Function;Molecular Function;Molecular Function;Molecular Function	MS-DArT_site_11458|MS-DArT_site_11459	0
Eucgr.B02910	Chr02	48584324	48586902	+	PTHR36407:SF1 - MEDIATOR-ASSOCIATED PROTEIN 2 (1 of 2) & mediator-associated 2				PTHR36407 (PANTHER);PTHR36407:SF1 (PANTHER)				MS-DArT_site_11501	0
Eucgr.B02887	Chr02	48830397	48837449	-	K10758 - thiol oxidase (QSOX) (1 of 2) & sulfhydryl oxidase 2 isoform X1	GO:0045454, GO:0055114, GO:0016972 & GO:0005615 & GO:0003756 & GO:0030173 & GO:0045454 & GO:0055114 & GO:0016971 & GO:0006457	1.8.3.2 & 5.3.4.1	Thiol oxidase. & Protein disulfide-isomerase & Thiol oxidase	G3DSA:1.20.120.310 (GENE3D);PF04777 (PFAM);G3DSA:3.40.30.10 (GENE3D);PF00085 (PFAM);PTHR22897 (PANTHER);PS00194 (PROSITE_PATTERNS);SIGNAL_PEPTIDE_H_REGION (PHOBIUS);TRANSMEMBRANE (PHOBIUS);CYTOPLASMIC_DOMAIN (PHOBIUS);SIGNAL_PEPTIDE_C_REGION (PHOBIUS);NON_CYTOPLASMIC_DOMAIN (PHOBIUS);SIGNAL_PEPTIDE (PHOBIUS);SIGNAL_PEPTIDE_N_REGION (PHOBIUS);PS51352 (PROSITE_PROFILES);PS51324 (PROSITE_PROFILES);S…	GO:0055114/GO:0016972;GO:0055114/GO:0016972;GO:0045454;GO:0045454;GO:0045454;GO:0055114/GO:0016972;GO:0055114/GO:0016972	oxidation-reduction process/thiol oxidase activity;oxidation-reduction process/thiol oxidase activity;cell redox homeostasis;cell redox homeostasis;cell redox homeostasis;oxidation-reduction process/thiol oxidase activity;oxidation-reduction process/thiol oxidase activity	Biological Process/Molecular Function;Biological Process/Molecular Function;Biological Process;Biological Process;Biological Process;Biological Process/Molecular Function;Biological Process/Molecular Function	MS-DArT_site_11532	0
Eucgr.B02861	Chr02	49168327	49172955	-	zinc finger CONSTANS-LIKE 10-like	GO:0008270 & GO:0005622			SM00336 (SMART);PTHR31717 (PANTHER);PTHR31717:SF14 (PANTHER);PS50119 (PROSITE_PROFILES)	GO:0008270/GO:0005622;GO:0008270/GO:0005622	zinc ion binding/intracellular;zinc ion binding/intracellular	Molecular Function/Cellular Component;Molecular Function/Cellular Component	MS-DArT_site_11586	0
Eucgr.B02984	Chr02	50141519	50142664	+	K04733 - interleukin-1 receptor-associated kinase 4 (IRAK4) (1 of 57) & LEAF RUST 10 DISEASE-RESISTANCE LOCUS RECEPTOR-LIKE PROTEIN KINASE-like	GO:0006468, GO:0005524, GO:0004672 & GO:0005524 & GO:0016021 & GO:0004674 & GO:0006468	3.1.4.46 & 2.7.11	Glycerophosphodiester phosphodiesterase. & Transferring phosphorus-containing groups	SM00220 (SMART);G3DSA:1.10.510.10 (GENE3D);PF00069 (PFAM);G3DSA:2.60.120.200 (GENE3D);G3DSA:3.30.200.20 (GENE3D);PTHR27009 (PANTHER);PTHR27009:SF21 (PANTHER);PS00107 (PROSITE_PATTERNS);PS00108 (PROSITE_PATTERNS);TRANSMEMBRANE (PHOBIUS);NON_CYTOPLASMIC_DOMAIN (PHOBIUS);CYTOPLASMIC_DOMAIN (PHOBIUS);PS50011 (PROSITE_PROFILES);SSF56112 (SUPERFAMILY);TMhelix (TMHMM)	GO:0006468/GO:0004672/GO:0005524;GO:0006468/GO:0004672/GO:0005524;GO:0005524;GO:0006468/GO:0004672;GO:0006468/GO:0004672/GO:0005524	protein phosphorylation/protein kinase activity/ATP binding;protein phosphorylation/protein kinase activity/ATP binding;ATP binding;protein phosphorylation/protein kinase activity;protein phosphorylation/protein kinase activity/ATP binding	Biological Process/Molecular Function/Molecular Function;Biological Process/Molecular Function/Molecular Function;Molecular Function;Biological Process/Molecular Function;Biological Process/Molecular Function/Molecular Function	MS-DArT_site_11644	0
Eucgr.B02995	Chr02	50252800	50265377	-	PTHR23131 - METALLO-BETA-LACTAMASE RELATED (1 of 1), & hypothetical protein EUGRSUZ_B02995	GO:0009536	1.13.11.18,	Sulfur dioxygenase.,	SM00849 (SMART);G3DSA:3.60.15.10 (GENE3D);PTHR23131:SF2 (PANTHER);PTHR23131 (PANTHER);SSF56281 (SUPERFAMILY)				MS-DArT_site_11651	0
Eucgr.B03031	Chr02	50592204	50599405	+	K03456 - serine/threonine-protein phosphatase 2A regulatory subunit A (PPP2R1) (1 of 2) & serine threonine- phosphatase 2A 65 kDa regulatory subunit A beta isoform				PF13646 (PFAM);G3DSA:1.25.10.10 (GENE3D);PF12755 (PFAM);PTHR10648:SF11 (PANTHER);PTHR10648 (PANTHER);PS50077 (PROSITE_PROFILES);SSF48371 (SUPERFAMILY)	GO:0005488	binding	Molecular Function	MS-DArT_site_11704,MS-DArT_site_11703	0,0
Eucgr.B03034	Chr02	50611646	50616656	-	PTHR12385:SF36 - PLASMA-MEMBRANE CHOLINE TRANSPORTER-LIKE PROTEIN (1 of 1) & CTL DDB_G0274487	GO:0016021			PF04515 (PFAM);PTHR12385:SF36 (PANTHER);PTHR12385 (PANTHER);NON_CYTOPLASMIC_DOMAIN (PHOBIUS);NON_CYTOPLASMIC_DOMAIN (PHOBIUS);NON_CYTOPLASMIC_DOMAIN (PHOBIUS);CYTOPLASMIC_DOMAIN (PHOBIUS);TRANSMEMBRANE (PHOBIUS);TRANSMEMBRANE (PHOBIUS);TRANSMEMBRANE (PHOBIUS);NON_CYTOPLASMIC_DOMAIN (PHOBIUS);TRANSMEMBRANE (PHOBIUS);CYTOPLASMIC_DOMAIN (PHOBIUS);TRANSMEMBRANE (PHOBIUS);CYTOPLASMIC_DOMAIN (PHOBIUS);…				MS-DArT_site_11706|MS-DArT_site_11707	0
Eucgr.B03043	Chr02	50666716	50669967	+	PF12706 - Beta-lactamase superfamily domain (Lactamase_B_2) (1 of 9) & Metallo-hydrolase oxidoreductase superfamily isoform 1	GO:0009507 & GO:0016787			PF13483 (PFAM);G3DSA:3.60.15.10 (GENE3D);PTHR36142:SF2 (PANTHER);PTHR36142 (PANTHER);SignalP-TM (SIGNALP_GRAM_POSITIVE);SSF56281 (SUPERFAMILY)				MS-DArT_site_11721	0
Eucgr.B03053	Chr02	50784196	50790631	-	PTHR27003:SF5 - DI-GLUCOSE BINDING PROTEIN WITH LEUCINE-RICH REPEAT DOMAIN (1 of 3) & leucine-rich repeat receptor-like serine threonine- kinase At2g14440	GO:0005802 & GO:0005768 & GO:0016021 & GO:0016310 & GO:0016301 & GO:0005886	2.7.11.1, 2.7.10.1	Non-specific serine/threonine protein kinase., Receptor protein-tyrosine kinase.	PF12819 (PFAM);G3DSA:3.80.10.10 (GENE3D);PTHR27003:SF5 (PANTHER);PTHR27003 (PANTHER);SIGNAL_PEPTIDE (PHOBIUS);SIGNAL_PEPTIDE_H_REGION (PHOBIUS);CYTOPLASMIC_DOMAIN (PHOBIUS);SIGNAL_PEPTIDE_C_REGION (PHOBIUS);SIGNAL_PEPTIDE_N_REGION (PHOBIUS);NON_CYTOPLASMIC_DOMAIN (PHOBIUS);TRANSMEMBRANE (PHOBIUS);SignalP-noTM (SIGNALP_GRAM_NEGATIVE);SignalP-noTM (SIGNALP_EUK);SSF52058 (SUPERFAMILY);TMhelix (TMHMM)				MS-DArT_site_11743	0
Eucgr.B03056	Chr02	50836919	50846462	-	PTHR10044//PTHR10044:SF122 - INHIBITOR OF APOPTOSIS // SUBFAMILY NOT NAMED (1 of 1) & Transmembrane Fragile-X-F-associated	GO:0004842 & GO:0008270 & GO:0005737 & GO:0016021 & GO:0009966 & GO:0016567			Coil (COILS);SM00184 (SMART);G3DSA:3.30.40.10 (GENE3D);PF10269 (PFAM);PF13920 (PFAM);PTHR10044 (PANTHER);PTHR10044:SF122 (PANTHER);NON_CYTOPLASMIC_DOMAIN (PHOBIUS);TRANSMEMBRANE (PHOBIUS);CYTOPLASMIC_DOMAIN (PHOBIUS);TRANSMEMBRANE (PHOBIUS);CYTOPLASMIC_DOMAIN (PHOBIUS);NON_CYTOPLASMIC_DOMAIN (PHOBIUS);SIGNAL_PEPTIDE_N_REGION (PHOBIUS);TRANSMEMBRANE (PHOBIUS);SIGNAL_PEPTIDE_H_REGION (PHOBIUS);SIGN…	GO:0008270/GO:0005515;GO:0008270/GO:0005515	zinc ion binding/protein binding;zinc ion binding/protein binding	Molecular Function/Molecular Function;Molecular Function/Molecular Function	MS-DArT_site_11756	0
Eucgr.B03067	Chr02	50930985	50942616	+	PTHR30523:SF6 - PHOSPHOENOLPYRUVATE CARBOXYLASE 4 (1 of 1), & phosphoenolpyruvate carboxylase 4	GO:0015977, GO:0008964, GO:0006099 & GO:0005829 & GO:0006099 & GO:0015977 & GO:0008964	4.1.1.31 & 4.1.1	Phosphoenolpyruvate carboxylase. & Carbon-carbon lyases & Phosphoenolpyruvate carboxylase	PR00150 (PRINTS);PF00311 (PFAM);G3DSA:1.20.1440.90 (GENE3D);PTHR30523 (PANTHER);PTHR30523:SF6 (PANTHER);PS00393 (PROSITE_PATTERNS);PS00781 (PROSITE_PATTERNS);MF_00595 (HAMAP);SSF51621 (SUPERFAMILY)	GO:0008964/GO:0015977/GO:0006099;GO:0008964/GO:0015977/GO:0006099;GO:0015977/GO:0008964/GO:0006099;GO:0003824	phosphoenolpyruvate carboxylase activity/carbon fixation/tricarboxylic acid cycle;phosphoenolpyruvate carboxylase activity/carbon fixation/tricarboxylic acid cycle;carbon fixation/phosphoenolpyruvate carboxylase activity/tricarboxylic acid cycle;catalytic activity	Molecular Function/Biological Process/Biological Process;Molecular Function/Biological Process/Biological Process;Biological Process/Molecular Function/Biological Process;Molecular Function	MS-DArT_site_11761	0
Eucgr.B03069	Chr02	50954801	50962084	-	PTHR23024//PTHR23024:SF208 - MEMBER OF 'GDXG' FAMILY OF LIPOLYTIC ENZYMES // SUBFAMILY NOT NAMED (1 of 2) & probable isoprenylcysteine alpha-carbonyl methylesterase ICMEL1	GO:0016787, GO:0008152 & GO:0005789 & GO:0008152 & GO:0016021 & GO:0000139 & GO:0016787			G3DSA:3.40.50.1820 (GENE3D);PF07859 (PFAM);PTHR23024:SF208 (PANTHER);PTHR23024 (PANTHER);TRANSMEMBRANE (PHOBIUS);CYTOPLASMIC_DOMAIN (PHOBIUS);NON_CYTOPLASMIC_DOMAIN (PHOBIUS);SignalP-TM (SIGNALP_GRAM_POSITIVE);SSF53474 (SUPERFAMILY)	GO:0016787/GO:0008152	hydrolase activity/metabolic process	Molecular Function/Biological Process	MS-DArT_site_11766|MS-DArT_site_11767	0
Eucgr.B03073	Chr02	51012688	51018043	-	PTHR27001:SF6 - PROLINE-RICH RECEPTOR-LIKE PROTEIN KINASE PERK10-RELATED (1 of 1) & proline-rich receptor kinase PERK9	GO:0006468, GO:0005524, GO:0004672 & GO:0005524 & GO:0016021 & GO:0005199 & GO:0004674 & GO:0006468	2.7.11.1 & 2.7.11	Non-specific serine/threonine protein kinase. & Transferring phosphorus-containing groups	PR01217 (PRINTS);SM00220 (SMART);G3DSA:1.10.510.10 (GENE3D);PF00069 (PFAM);G3DSA:3.30.200.20 (GENE3D);G3DSA:2.60.120.200 (GENE3D);PTHR27001:SF6 (PANTHER);PTHR27001 (PANTHER);PTHR27001:SF6 (PANTHER);PTHR27001 (PANTHER);PS00107 (PROSITE_PATTERNS);PS00108 (PROSITE_PATTERNS);CYTOPLASMIC_DOMAIN (PHOBIUS);NON_CYTOPLASMIC_DOMAIN (PHOBIUS);TRANSMEMBRANE (PHOBIUS);PS50011 (PROSITE_PROFILES);SSF56112 (SUPE…	GO:0004672/GO:0006468/GO:0005524;GO:0004672/GO:0006468/GO:0005524;GO:0005524;GO:0004672/GO:0006468;GO:0004672/GO:0006468/GO:0005524	protein kinase activity/protein phosphorylation/ATP binding;protein kinase activity/protein phosphorylation/ATP binding;ATP binding;protein kinase activity/protein phosphorylation;protein kinase activity/protein phosphorylation/ATP binding	Molecular Function/Biological Process/Molecular Function;Molecular Function/Biological Process/Molecular Function;Molecular Function;Molecular Function/Biological Process;Molecular Function/Biological Process/Molecular Function	MS-DArT_site_11778	0
Eucgr.B03084	Chr02	51166498	51170936	-	PF13041 - PPR repeat family (PPR_2) (1 of 527), & pentatricopeptide repeat-containing At2g01390	GO:0016021			PF13812 (PFAM);TIGR00756 (TIGRFAM);G3DSA:1.25.40.10 (GENE3D);PF13041 (PFAM);PTHR24015:SF600 (PANTHER);PTHR24015 (PANTHER);TRANSMEMBRANE (PHOBIUS);CYTOPLASMIC_DOMAIN (PHOBIUS);NON_CYTOPLASMIC_DOMAIN (PHOBIUS);PS51375 (PROSITE_PROFILES);SSF48452 (SUPERFAMILY);TMhelix (TMHMM)	GO:0005515;GO:0005515	protein binding;protein binding	Molecular Function;Molecular Function	MS-DArT_site_11788	0
Eucgr.B03091	Chr02	51212923	51215198	-	PTHR31388:SF9 - PEROXIDASE 11 (1 of 4) & peroxidase 11	GO:0055114, GO:0020037, GO:0006979, GO:0004601 & GO:0004601 & GO:0006979 & GO:0046872 & GO:0098869 & GO:0055114 & GO:0005576 & GO:0020037 & GO:0042744	1.11.1.7	Peroxidase. & Peroxidase	PR00461 (PRINTS);PR00458 (PRINTS);G3DSA:1.10.520.10 (GENE3D);G3DSA:1.10.420.10 (GENE3D);PF00141 (PFAM);PTHR31388:SF9 (PANTHER);PTHR31388 (PANTHER);PS00435 (PROSITE_PATTERNS);PS00436 (PROSITE_PATTERNS);PS50873 (PROSITE_PROFILES);SSF48113 (SUPERFAMILY)	GO:0055114/GO:0004601/GO:0020037/GO:0006979;GO:0006979/GO:0004601/GO:0020037/GO:0055114;GO:0006979/GO:0004601/GO:0020037/GO:0055114;GO:0004601/GO:0055114;GO:0006979/GO:0004601/GO:0020037/GO:0055114;GO:0006979/GO:0004601/GO:0055114/GO:0020037	oxidation-reduction process/peroxidase activity/heme binding/response to oxidative stress;response to oxidative stress/peroxidase activity/heme binding/oxidation-reduction process;response to oxidative stress/peroxidase activity/heme binding/oxidation-reduction process;peroxidase activity/oxidation-reduction process;response to oxidative stress/peroxidase activity/heme binding/oxidation-reduction…	Biological Process/Molecular Function/Molecular Function/Biological Process;Biological Process/Molecular Function/Molecular Function/Biological Process;Biological Process/Molecular Function/Molecular Function/Biological Process;Molecular Function/Biological Process;Biological Process/Molecular Function/Molecular Function/Biological Process;Biological Process/Molecular Function/Biological Process/…	MS-DArT_site_11798	0
Eucgr.B03156	Chr02	52002607	52008463	+	PTHR10992:SF801 - ALPHA/BETA-HYDROLASES SUPERFAMILY PROTEIN (1 of 1), & uncharacterized hydrolase isoform X1	GO:0016787	3.7.1.14,	2-hydroxy-6-oxonona-2,4-dienedioate hydrolase.,	PR00412 (PRINTS);PR00111 (PRINTS);PF12697 (PFAM);G3DSA:3.40.50.1820 (GENE3D);PTHR10992:SF801 (PANTHER);PTHR10992 (PANTHER);NON_CYTOPLASMIC_DOMAIN (PHOBIUS);SIGNAL_PEPTIDE_N_REGION (PHOBIUS);SIGNAL_PEPTIDE_H_REGION (PHOBIUS);SIGNAL_PEPTIDE (PHOBIUS);SIGNAL_PEPTIDE_C_REGION (PHOBIUS);SignalP-noTM (SIGNALP_GRAM_NEGATIVE);SignalP-TM (SIGNALP_GRAM_POSITIVE);SSF53474 (SUPERFAMILY)	GO:0003824	catalytic activity	Molecular Function	MS-DArT_site_11903	0
Eucgr.B03196	Chr02	52302784	52308717	+	PTHR10663:SF155 - ARF GUANINE-NUCLEOTIDE EXCHANGE FACTOR GNL1-RELATED (1 of 1) & ARF guanine-nucleotide exchange factor GNOM	GO:0032012, GO:0005086 & GO:0042803 & GO:0010087 & GO:0010274 & GO:0005086 & GO:0000911 & GO:0007155 & GO:0048765 & GO:0006897 & GO:0005886 & GO:0043547 & GO:0009942 & GO:0005802 & GO:0009826 & GO:0005768 & GO:0001736 & GO:0032509 & GO:0032012 & GO:0071555 & GO:0010540 & GO:0010311			SM00222 (SMART);G3DSA:1.10.220.20 (GENE3D);PF01369 (PFAM);G3DSA:1.10.1000.11 (GENE3D);PF12783 (PFAM);PTHR10663 (PANTHER);PTHR10663:SF155 (PANTHER);CYTOPLASMIC_DOMAIN (PHOBIUS);NON_CYTOPLASMIC_DOMAIN (PHOBIUS);CYTOPLASMIC_DOMAIN (PHOBIUS);NON_CYTOPLASMIC_DOMAIN (PHOBIUS);TRANSMEMBRANE (PHOBIUS);TRANSMEMBRANE (PHOBIUS);TRANSMEMBRANE (PHOBIUS);PS50190 (PROSITE_PROFILES);SSF48425 (SUPERFAMILY);SSF483…	GO:0032012/GO:0005086;GO:0032012/GO:0005086;GO:0032012/GO:0005086;GO:0032012/GO:0005086;GO:0005488	regulation of ARF protein signal transduction/ARF guanyl-nucleotide exchange factor activity;regulation of ARF protein signal transduction/ARF guanyl-nucleotide exchange factor activity;regulation of ARF protein signal transduction/ARF guanyl-nucleotide exchange factor activity;regulation of ARF protein signal transduction/ARF guanyl-nucleotide exchange factor activity;binding	Biological Process/Molecular Function;Biological Process/Molecular Function;Biological Process/Molecular Function;Biological Process/Molecular Function;Molecular Function	MS-DArT_site_11972,MS-DArT_site_11974,MS-DArT_site_11973	0,0,0
Eucgr.B03438	Chr02	52574890	52579055	-	PTHR10794:SF53 - CAAX AMINO TERMINAL PROTEASE FAMILY PROTEIN (1 of 1) & CAAX amino terminal protease family	GO:0016020 & GO:0006508 & GO:0016021 & GO:0008233			PF02517 (PFAM);PTHR10794 (PANTHER);PTHR10794:SF53 (PANTHER);TRANSMEMBRANE (PHOBIUS);SIGNAL_PEPTIDE (PHOBIUS);CYTOPLASMIC_DOMAIN (PHOBIUS);SIGNAL_PEPTIDE_N_REGION (PHOBIUS);NON_CYTOPLASMIC_DOMAIN (PHOBIUS);TRANSMEMBRANE (PHOBIUS);NON_CYTOPLASMIC_DOMAIN (PHOBIUS);TRANSMEMBRANE (PHOBIUS);CYTOPLASMIC_DOMAIN (PHOBIUS);SIGNAL_PEPTIDE_H_REGION (PHOBIUS);CYTOPLASMIC_DOMAIN (PHOBIUS);SIGNAL_PEPTIDE_C_REGI…	GO:0016020	membrane	Cellular Component	MS-DArT_site_12014	0
Eucgr.B03436	Chr02	52596306	52599105	-	1.14.13.169 - Transferred entry: 1.14.18.5 (1 of 2) & sphinganine C4-monooxygenase 1	GO:0055114, GO:0016491, GO:0006633, GO:0005506 & GO:0000254 & GO:0009640 & GO:0005506 & GO:0046520 & GO:0016021 & GO:0005783 & GO:0005794 & GO:0055114 & GO:0006633	1.14.13.169 & 1.14.13.72 & 1.14.13	Sphinganine C(4)-monooxygenase. & Methylsterol monooxygenase & Acting on paired donors, with incorporation or reduction of molecular oxygen. The oxygen incorporated need not be derived from O(2)	PF04116 (PFAM);PTHR11863 (PANTHER);PTHR11863:SF52 (PANTHER);TRANSMEMBRANE (PHOBIUS);TRANSMEMBRANE (PHOBIUS);NON_CYTOPLASMIC_DOMAIN (PHOBIUS);CYTOPLASMIC_DOMAIN (PHOBIUS);CYTOPLASMIC_DOMAIN (PHOBIUS);NON_CYTOPLASMIC_DOMAIN (PHOBIUS);TRANSMEMBRANE (PHOBIUS);TMhelix (TMHMM);TMhelix (TMHMM);TMhelix (TMHMM)	GO:0016491/GO:0055114/GO:0006633/GO:0005506	oxidoreductase activity/oxidation-reduction process/fatty acid biosynthetic process/iron ion binding	Molecular Function/Biological Process/Biological Process/Molecular Function	MS-DArT_site_12015	0
Eucgr.B03434	Chr02	52609344	52614935	+	PTHR12956//PTHR12956:SF27 - ALKALINE CERAMIDASE-RELATED // SUBFAMILY NOT NAMED (1 of 1) & PREDICTED: uncharacterized protein LOC104433624	GO:0016021			PF04765 (PFAM);PTHR12956:SF27 (PANTHER);PTHR12956 (PANTHER);CYTOPLASMIC_DOMAIN (PHOBIUS);NON_CYTOPLASMIC_DOMAIN (PHOBIUS);TRANSMEMBRANE (PHOBIUS);TMhelix (TMHMM)				MS-DArT_site_12018,MS-DArT_site_12019	0,0
Eucgr.B03422	Chr02	52718546	52720064	-	PTHR24413:SF138 - F-BOX/KELCH-REPEAT PROTEIN SKIP11 (1 of 2) & F-box kelch-repeat SKIP11-like	GO:0005515			SM00612 (SMART);G3DSA:2.130.10.80 (GENE3D);PF01344 (PFAM);PTHR24413:SF138 (PANTHER);PTHR24413 (PANTHER);SSF117281 (SUPERFAMILY)	GO:0005515;GO:0005515	protein binding;protein binding	Molecular Function;Molecular Function	MS-DArT_site_12035,MS-DArT_site_12034	0,0
Eucgr.B03418	Chr02	52764923	52771535	+	PTHR19432:SF27 - SUCROSE TRANSPORT PROTEIN SUC3 (1 of 1) & sucrose transport SUC3	GO:0055085, GO:0016021, GO:0015770, GO:0008515, GO:0005887 & GO:0005887 & GO:0055085 & GO:0015770 & GO:0005794 & GO:0008515 & GO:0090406			G3DSA:1.20.1250.20 (GENE3D);G3DSA:1.20.1250.20 (GENE3D);PF07690 (PFAM);PTHR19432:SF27 (PANTHER);PTHR19432 (PANTHER);PTHR19432:SF27 (PANTHER);PTHR19432 (PANTHER);TRANSMEMBRANE (PHOBIUS);CYTOPLASMIC_DOMAIN (PHOBIUS);TRANSMEMBRANE (PHOBIUS);TRANSMEMBRANE (PHOBIUS);CYTOPLASMIC_DOMAIN (PHOBIUS);TRANSMEMBRANE (PHOBIUS);TRANSMEMBRANE (PHOBIUS);TRANSMEMBRANE (PHOBIUS);NON_CYTOPLASMIC_DOMAIN (PHOBIUS);NON…	GO:0016021/GO:0055085;GO:0005887/GO:0015770/GO:0008515;GO:0005887/GO:0015770/GO:0008515	integral component of membrane/transmembrane transport;integral component of plasma membrane/sucrose transport/sucrose transmembrane transporter activity;integral component of plasma membrane/sucrose transport/sucrose transmembrane transporter activity	Cellular Component/Biological Process;Cellular Component/Biological Process/Molecular Function;Cellular Component/Biological Process/Molecular Function	MS-DArT_site_12042,MS-DArT_site_12041	0,0
Eucgr.B03403	Chr02	52901698	52904971	-	PTHR24078:SF317 - DNAJ HEAT SHOCK PROTEIN-RELATED (1 of 1) & dnaJ homolog subfamily B member 1	GO:0051082 & GO:0006457			PR00625 (PRINTS);SM00271 (SMART);PF00226 (PFAM);G3DSA:2.60.260.20 (GENE3D);G3DSA:2.60.260.20 (GENE3D);G3DSA:1.10.287.110 (GENE3D);PF01556 (PFAM);PTHR24078:SF317 (PANTHER);PTHR24078 (PANTHER);PS00636 (PROSITE_PATTERNS);PS50076 (PROSITE_PROFILES);SSF49493 (SUPERFAMILY);SSF49493 (SUPERFAMILY);SSF46565 (SUPERFAMILY)	GO:0006457/GO:0051082;GO:0006457/GO:0051082	protein folding/unfolded protein binding;protein folding/unfolded protein binding	Biological Process/Molecular Function;Biological Process/Molecular Function	MS-DArT_site_12058	0
Eucgr.B03390	Chr02	52991695	53008790	+	K14802 - phospholipid-transporting ATPase [EC:3.6.3.1] (DRS2, ATP8A) (1 of 3), & phospholipid-transporting ATPase 3	GO:0046872, GO:0000166, GO:0016021, GO:0015914, GO:0005524, GO:0004012, GO:0000287 & GO:0000287 & GO:0005524 & GO:0005802 & GO:0045332 & GO:0016021 & GO:0000139 & GO:0004012 & GO:0048194 & GO:0005886	3.6.3.1 & 3.6.1 & 3.6.1.3 & 3.6.1.15	Phospholipid-translocating ATPase. & Acting on acid anhydrides & Adenosinetriphosphatase & Phospholipid-translocating ATPase & Nucleoside-triphosphate phosphatase	PR00119 (PRINTS);PF16209 (PFAM);G3DSA:2.70.150.10 (GENE3D);G3DSA:3.40.1110.10 (GENE3D);G3DSA:3.40.50.1000 (GENE3D);PF00122 (PFAM);PF16212 (PFAM);PF13246 (PFAM);TIGR01494 (TIGRFAM);TIGR01652 (TIGRFAM);PTHR24092 (PANTHER);PTHR24092:SF85 (PANTHER);PS00154 (PROSITE_PATTERNS);NON_CYTOPLASMIC_DOMAIN (PHOBIUS);TRANSMEMBRANE (PHOBIUS);NON_CYTOPLASMIC_DOMAIN (PHOBIUS);TRANSMEMBRANE (PHOBIUS);TRANSMEMBRANE…	GO:0046872/GO:0000166;GO:0000166;GO:0046872/GO:0000166;GO:0016021;GO:0005524/GO:0000287/GO:0015914/GO:0016021/GO:0004012;GO:0005524/GO:0000287/GO:0015914/GO:0016021/GO:0004012;GO:0000166	metal ion binding/nucleotide binding;nucleotide binding;metal ion binding/nucleotide binding;integral component of membrane;ATP binding/magnesium ion binding/phospholipid transport/integral component of membrane/phospholipid-translocating ATPase activity;ATP binding/magnesium ion binding/phospholipid transport/integral component of membrane/phospholipid-translocating ATPase activity;nucleotide bi…	Molecular Function/Molecular Function;Molecular Function;Molecular Function/Molecular Function;Cellular Component;Molecular Function/Molecular Function/Biological Process/Cellular Component/Molecular Function;Molecular Function/Molecular Function/Biological Process/Cellular Component/Molecular Function;Molecular Function	MS-DArT_site_12078,MS-DArT_site_12077,MS-DArT_site_12076	0,0,0
Eucgr.B03381	Chr02	53082345	53090720	+	K11644 - paired amphipathic helix protein Sin3a (SIN3A) (1 of 3) & paired amphipathic helix Sin3-like 4 isoform X1	GO:0006355 & GO:0000122 & GO:0004407 & GO:0000118 & GO:0001106 & GO:0016575 & GO:0000785	3.5.1.98	Histone deacetylase	Coil (COILS);SM00761 (SMART);PF02671 (PFAM);G3DSA:1.20.1160.11 (GENE3D);PF16879 (PFAM);PF08295 (PFAM);PTHR12346 (PANTHER);PTHR12346:SF8 (PANTHER);PS51477 (PROSITE_PROFILES);SSF47762 (SUPERFAMILY);SSF47762 (SUPERFAMILY);SSF47762 (SUPERFAMILY)	GO:0006355;GO:0006355;GO:0006355;GO:0006355;GO:0006355;GO:0006355	regulation of transcription, DNA-templated;regulation of transcription, DNA-templated;regulation of transcription, DNA-templated;regulation of transcription, DNA-templated;regulation of transcription, DNA-templated;regulation of transcription, DNA-templated	Biological Process;Biological Process;Biological Process;Biological Process;Biological Process;Biological Process	MS-DArT_site_12100|MS-DArT_site_12101	0
Eucgr.B03367	Chr02	53203892	53212219	+	KOG4308 - LRR-containing protein (1 of 3) & NLRC3 isoform X1	GO:0005739 & GO:0009941			SM00368 (SMART);G3DSA:3.80.10.10 (GENE3D);PF13516 (PFAM);PTHR24106 (PANTHER);NON_CYTOPLASMIC_DOMAIN (PHOBIUS);CYTOPLASMIC_DOMAIN (PHOBIUS);TRANSMEMBRANE (PHOBIUS);SSF52047 (SUPERFAMILY);SSF52047 (SUPERFAMILY)	GO:0005515	protein binding	Molecular Function	MS-DArT_site_12125	0
Eucgr.B03347	Chr02	53373823	53380356	-	K12822 - RNA-binding protein 25 (RBM25, S164) (1 of 1) & RNA-binding 25 isoform X2	GO:0003676, GO:0006397 & GO:0000166 & GO:0003676 & GO:0006397			Coil (COILS);Coil (COILS);Coil (COILS);SM00360 (SMART);SM00311 (SMART);PF01480 (PFAM);G3DSA:3.30.70.330 (GENE3D);PF00076 (PFAM);G3DSA:1.20.1390.10 (GENE3D);PTHR18806:SF4 (PANTHER);PTHR18806 (PANTHER);PS51025 (PROSITE_PROFILES);PS50102 (PROSITE_PROFILES);SSF101233 (SUPERFAMILY);SSF54928 (SUPERFAMILY)	GO:0003676;GO:0006397;GO:0006397;GO:0000166;GO:0003676;GO:0006397;GO:0006397;GO:0003676;GO:0006397;GO:0000166	nucleic acid binding;mRNA processing;mRNA processing;nucleotide binding;nucleic acid binding;mRNA processing;mRNA processing;nucleic acid binding;mRNA processing;nucleotide binding	Molecular Function;Biological Process;Biological Process;Molecular Function;Molecular Function;Biological Process;Biological Process;Molecular Function;Biological Process;Molecular Function	MS-DArT_site_12151	0
Eucgr.B03312	Chr02	53709888	53715208	-	PTHR31375:SF46 - PECTIN LYASE-LIKE PROTEIN (1 of 1), & polygalacturonase At1g48100	GO:0005975, GO:0004650 & GO:0005975 & GO:0016829 & GO:0004650 & GO:0071555 & GO:0005576 & GO:0047911	3.2.1.15 & 3.2.1.67	Polygalacturonase. & Galacturan 1,4-alpha-galacturonidase & Polygalacturonase	SM00710 (SMART);G3DSA:2.160.20.10 (GENE3D);PF00295 (PFAM);PTHR31375 (PANTHER);PTHR31375:SF46 (PANTHER);PS00502 (PROSITE_PATTERNS);SIGNAL_PEPTIDE_N_REGION (PHOBIUS);SIGNAL_PEPTIDE_C_REGION (PHOBIUS);NON_CYTOPLASMIC_DOMAIN (PHOBIUS);SIGNAL_PEPTIDE_H_REGION (PHOBIUS);SIGNAL_PEPTIDE (PHOBIUS);SignalP-noTM (SIGNALP_EUK);SSF51126 (SUPERFAMILY)	GO:0004650/GO:0005975;GO:0004650/GO:0005975	polygalacturonase activity/carbohydrate metabolic process;polygalacturonase activity/carbohydrate metabolic process	Molecular Function/Biological Process;Molecular Function/Biological Process	MS-DArT_site_12200	0
Eucgr.B03306	Chr02	53761242	53774626	+	PTHR27001:SF49 - PROTEIN NSP-INTERACTING KINASE 3 (1 of 2) & NSP-INTERACTING KINASE 3	GO:0006468, GO:0005524, GO:0004672, GO:0005515 & GO:0005524 & GO:0016021 & GO:0004674 & GO:0006468 & GO:0005886	2.7.11.1 & 2.7.11	Non-specific serine/threonine protein kinase. & Transferring phosphorus-containing groups	SM00220 (SMART);G3DSA:1.10.510.10 (GENE3D);PF00069 (PFAM);G3DSA:3.80.10.10 (GENE3D);G3DSA:2.60.120.200 (GENE3D);PF08263 (PFAM);G3DSA:3.30.200.20 (GENE3D);PTHR27001 (PANTHER);PTHR27001:SF49 (PANTHER);PS00108 (PROSITE_PATTERNS);PS00107 (PROSITE_PATTERNS);SIGNAL_PEPTIDE_H_REGION (PHOBIUS);SIGNAL_PEPTIDE_N_REGION (PHOBIUS);NON_CYTOPLASMIC_DOMAIN (PHOBIUS);TRANSMEMBRANE (PHOBIUS);SIGNAL_PEPTIDE (PHOBI…	GO:0004672/GO:0005524/GO:0006468;GO:0004672/GO:0005524/GO:0006468;GO:0004672/GO:0006468;GO:0005524;GO:0004672/GO:0005524/GO:0006468	protein kinase activity/ATP binding/protein phosphorylation;protein kinase activity/ATP binding/protein phosphorylation;protein kinase activity/protein phosphorylation;ATP binding;protein kinase activity/ATP binding/protein phosphorylation	Molecular Function/Molecular Function/Biological Process;Molecular Function/Molecular Function/Biological Process;Molecular Function/Biological Process;Molecular Function;Molecular Function/Molecular Function/Biological Process	MS-DArT_site_12216	0
Eucgr.B03240	Chr02	54405195	54412908	-	PTHR10972:SF67 - OXYSTEROL-BINDING PROTEIN-RELATED PROTEIN 1D (1 of 3) & oxysterol-binding -related 1D				Coil (COILS);Coil (COILS);SM00233 (SMART);PF15413 (PFAM);PF01237 (PFAM);G3DSA:2.30.29.30 (GENE3D);PTHR10972:SF67 (PANTHER);PTHR10972 (PANTHER);PS50003 (PROSITE_PROFILES);SSF50729 (SUPERFAMILY);SSF144000 (SUPERFAMILY)				MS-DArT_site_12307|MS-DArT_site_12308,MS-DArT_site_12309	0,0
Eucgr.B03229	Chr02	54476857	54481089	-	PTHR31358:SF12 - TPX2 (TARGETING PROTEIN FOR XKLP2) PROTEIN FAMILY (1 of 3), & WVD2-like 7 isoform X1				Coil (COILS);PTHR31358 (PANTHER);PTHR31358:SF12 (PANTHER)				MS-DArT_site_12327	0
Eucgr.B03465	Chr02	54684922	54692086	+	K08818 - cell division cycle 2-like [EC:2.7.11.22] (CDC2L) (1 of 2) & cyclin-dependent kinase G-2 isoform X1	GO:0006468, GO:0005524, GO:0004672 & GO:0005524 & GO:0008353 & GO:0005829 & GO:0006468	2.7.11.22, 2.7.11.23 & 2.7.11 & 2.7.11.23	Cyclin-dependent kinase., [RNA-polymerase]-subunit kinase. & Transferring phosphorus-containing groups & [RNA-polymerase]-subunit kinase	SM00220 (SMART);PF00069 (PFAM);G3DSA:1.10.510.10 (GENE3D);G3DSA:3.30.200.20 (GENE3D);PTHR24056 (PANTHER);PTHR24056:SF107 (PANTHER);PS00108 (PROSITE_PATTERNS);PS50011 (PROSITE_PROFILES);SSF56112 (SUPERFAMILY)	GO:0004672/GO:0005524/GO:0006468;GO:0004672/GO:0005524/GO:0006468;GO:0004672/GO:0006468;GO:0004672/GO:0005524/GO:0006468	protein kinase activity/ATP binding/protein phosphorylation;protein kinase activity/ATP binding/protein phosphorylation;protein kinase activity/protein phosphorylation;protein kinase activity/ATP binding/protein phosphorylation	Molecular Function/Molecular Function/Biological Process;Molecular Function/Molecular Function/Biological Process;Molecular Function/Biological Process;Molecular Function/Molecular Function/Biological Process	MS-DArT_site_12357|MS-DArT_site_12358,MS-DArT_site_12359	0,0
Eucgr.B03480	Chr02	54862567	54874261	+	3.2.1.106 - Mannosyl-oligosaccharide glucosidase / Processing A-glucosidase I (1 of 1) & mannosyl-oligosaccharide glucosidase GCS1 isoform X1	GO:0005789 & GO:0016021 & GO:0006487 & GO:0004573 & GO:0009311	3.2.1.106, 3.2.1.20 & 3.2.1.106 & 3.2.1	Mannosyl-oligosaccharide glucosidase., Alpha-glucosidase. & Mannosyl-oligosaccharide glucosidase & Glycosylases	PF03200 (PFAM);PF16923 (PFAM);PTHR10412 (PANTHER);PTHR10412:SF10 (PANTHER);NON_CYTOPLASMIC_DOMAIN (PHOBIUS);TRANSMEMBRANE (PHOBIUS);CYTOPLASMIC_DOMAIN (PHOBIUS);SSF48208 (SUPERFAMILY);TMhelix (TMHMM)	GO:0009311/GO:0004573;GO:0003824	oligosaccharide metabolic process/mannosyl-oligosaccharide glucosidase activity;catalytic activity	Biological Process/Molecular Function;Molecular Function	MS-DArT_site_12393	0
Eucgr.B03500	Chr02	54998894	55003285	-	PTHR31251:SF1 - SQUAMOSA PROMOTER-BINDING-LIKE PROTEIN 10-RELATED (1 of 1) & squamosa promoter-binding 2	GO:0005634, GO:0003677 & GO:0005634 & GO:0003677			G3DSA:4.10.1100.10 (GENE3D);PF03110 (PFAM);PTHR31251:SF1 (PANTHER);PTHR31251 (PANTHER);PS51141 (PROSITE_PROFILES);SSF103612 (SUPERFAMILY)	GO:0003677/GO:0005634;GO:0003677/GO:0005634;GO:0003677/GO:0005634;GO:0003677/GO:0005634	DNA binding/nucleus;DNA binding/nucleus;DNA binding/nucleus;DNA binding/nucleus	Molecular Function/Cellular Component;Molecular Function/Cellular Component;Molecular Function/Cellular Component;Molecular Function/Cellular Component	MS-DArT_site_12432	0
Eucgr.B03506	Chr02	55023778	55031645	+	K14489 - arabidopsis histidine kinase 2/3/4 (cytokinin receptor) (AHK2_3_4) (1 of 4) & histidine kinase 3 isoform X1	GO:0007165, GO:0000155, GO:0000160 & GO:0010087 & GO:0048509 & GO:0010150 & GO:0010271 & GO:0006970 & GO:0043424 & GO:0023014 & GO:0042742 & GO:0080117 & GO:0005622 & GO:0000155 & GO:0009909 & GO:0000160 & GO:0016021 & GO:0071215 & GO:0010029 & GO:0016036 & GO:0071329 & GO:0034757 & GO:0070417 & GO:0018106	2.7.13.3 & 2.7.3	Histidine kinase. & Transferring phosphorus-containing groups & Histidine kinase	Coil (COILS);PR00344 (PRINTS);SM00448 (SMART);SM00387 (SMART);SM01079 (SMART);SM00388 (SMART);G3DSA:1.10.287.130 (GENE3D);PF00072 (PFAM);PF03924 (PFAM);G3DSA:3.40.50.2300 (GENE3D);PF02518 (PFAM);PF00512 (PFAM);G3DSA:3.30.565.10 (GENE3D);PTHR24423:SF381 (PANTHER);PTHR24423 (PANTHER);PTHR24423 (PANTHER);PTHR24423 (PANTHER);PTHR24423:SF381 (PANTHER);NON_CYTOPLASMIC_DOMAIN (PHOBIUS);TRANSMEMBRANE (PH…	GO:0016310/GO:0016772;GO:0000160;GO:0007165/GO:0000155;GO:0007165/GO:0000155;GO:0000160;GO:0007165/GO:0000155;GO:0000160;GO:0000160;GO:0007165/GO:0000155	phosphorylation/transferase activity, transferring phosphorus-containing groups;phosphorelay signal transduction system;signal transduction/phosphorelay sensor kinase activity;signal transduction/phosphorelay sensor kinase activity;phosphorelay signal transduction system;signal transduction/phosphorelay sensor kinase activity;phosphorelay signal transduction system;phosphorelay signal transductio…	Biological Process/Molecular Function;Biological Process;Biological Process/Molecular Function;Biological Process/Molecular Function;Biological Process;Biological Process/Molecular Function;Biological Process;Biological Process;Biological Process/Molecular Function	MS-DArT_site_12440	0
Eucgr.B03511	Chr02	55050855	55055533	-	PF01486 - K-box region (K-box) (1 of 51), & flowering locus C	GO:0006355, GO:0005634, GO:0003700 & GO:0005634 & GO:0003700 & GO:0006355 & GO:0005488			Coil (COILS);Coil (COILS);PF01486 (PFAM);PS51297 (PROSITE_PROFILES)	GO:0003700/GO:0006355/GO:0005634;GO:0003700/GO:0006355/GO:0005634	transcription factor activity, sequence-specific DNA binding/regulation of transcription, DNA-templated/nucleus;transcription factor activity, sequence-specific DNA binding/regulation of transcription, DNA-templated/nucleus	Molecular Function/Biological Process/Cellular Component;Molecular Function/Biological Process/Cellular Component	MS-DArT_site_12445	0
Eucgr.B03518	Chr02	55118387	55120136	-	PF03110 - SBP domain (SBP) (1 of 16) & squamosa promoter-binding 16	GO:0005634, GO:0003677 & GO:0005634 & GO:0003677			G3DSA:4.10.1100.10 (GENE3D);PF03110 (PFAM);PTHR31251 (PANTHER);PTHR31251:SF19 (PANTHER);PS51141 (PROSITE_PROFILES);SSF103612 (SUPERFAMILY)	GO:0003677/GO:0005634;GO:0003677/GO:0005634;GO:0003677/GO:0005634;GO:0003677/GO:0005634	DNA binding/nucleus;DNA binding/nucleus;DNA binding/nucleus;DNA binding/nucleus	Molecular Function/Cellular Component;Molecular Function/Cellular Component;Molecular Function/Cellular Component;Molecular Function/Cellular Component	MS-DArT_site_12459	0
Eucgr.B03528	Chr02	55195075	55200085	+	PTHR23429:SF3 - GLUCOSE-6-PHOSPHATE 1-DEHYDROGENASE 2, CHLOROPLASTIC-RELATED (1 of 2) & glucose-6-phosphate 1- chloroplastic	GO:0055114, GO:0050661, GO:0006006, GO:0004345 & GO:0050661 & GO:0006098 & GO:0055114 & GO:0006006 & GO:0004345	1.1.1.49	Glucose-6-phosphate dehydrogenase. & Glucose-6-phosphate dehydrogenase (NADP(+))	PR00079 (PRINTS);G3DSA:3.40.50.720 (GENE3D);PF00479 (PFAM);G3DSA:3.30.360.10 (GENE3D);TIGR00871 (TIGRFAM);PF02781 (PFAM);PTHR23429 (PANTHER);PTHR23429:SF3 (PANTHER);PS00069 (PROSITE_PATTERNS);SSF51735 (SUPERFAMILY);SSF55347 (SUPERFAMILY)	GO:0004345/GO:0006006/GO:0055114;GO:0050661/GO:0004345/GO:0006006/GO:0055114;GO:0004345/GO:0006006/GO:0055114;GO:0055114/GO:0004345/GO:0006006/GO:0050661;GO:0004345/GO:0006006/GO:0055114;GO:0004345/GO:0006006/GO:0055114	glucose-6-phosphate dehydrogenase activity/glucose metabolic process/oxidation-reduction process;NADP binding/glucose-6-phosphate dehydrogenase activity/glucose metabolic process/oxidation-reduction process;glucose-6-phosphate dehydrogenase activity/glucose metabolic process/oxidation-reduction process;oxidation-reduction process/glucose-6-phosphate dehydrogenase activity/glucose metabolic proces…	Molecular Function/Biological Process/Biological Process;Molecular Function/Molecular Function/Biological Process/Biological Process;Molecular Function/Biological Process/Biological Process;Biological Process/Molecular Function/Biological Process/Molecular Function;Molecular Function/Biological Process/Biological Process;Molecular Function/Biological Process/Biological Process	MS-DArT_site_12479	0
Eucgr.B03530	Chr02	55207930	55211824	+	3.1.1.92 - 4-sulfomuconolactone hydrolase (1 of 1), & 4-sulfomuconolactone hydrolase	GO:0016787 & GO:0009507	3.1.1.92	4-sulfomuconolactone hydrolase.	G3DSA:3.20.20.140 (GENE3D);PF04909 (PFAM);PTHR21240:SF1 (PANTHER);PTHR21240 (PANTHER);SSF51556 (SUPERFAMILY)	GO:0016787	hydrolase activity	Molecular Function	MS-DArT_site_12485	0
Eucgr.B03531	Chr02	55211895	55219332	-	K18730 - PERQ amino acid-rich with GYF domain-containing protein (GIGYF) (1 of 1), & PERQ amino acid-rich with GYF domain-containing	GO:0005515			Coil (COILS);SM00444 (SMART);PF02213 (PFAM);G3DSA:3.30.1490.40 (GENE3D);PTHR14445:SF41 (PANTHER);PTHR14445 (PANTHER);PS50829 (PROSITE_PROFILES);SSF55277 (SUPERFAMILY)	GO:0005515;GO:0005515;GO:0005515;GO:0005515;GO:0005515	protein binding;protein binding;protein binding;protein binding;protein binding	Molecular Function;Molecular Function;Molecular Function;Molecular Function;Molecular Function	MS-DArT_site_12488	0
Eucgr.B03561	Chr02	55508513	55513182	-	K10638 - E3 ubiquitin-protein ligase UHRF1 [EC:6.3.2.19] (UHRF1, NP95) (1 of 1) & E3 ubiquitin- ligase ORTHRUS 2-like	GO:0046872, GO:0042393 & GO:0008270 & GO:0061630 & GO:0042393 & GO:0010216 & GO:0090308 & GO:0005720 & GO:0016567	2.1.1.43	Histone-lysine N-methyltransferase.	Coil (COILS);SM00466 (SMART);SM00184 (SMART);SM00249 (SMART);G3DSA:3.30.40.10 (GENE3D);PF13445 (PFAM);PF02182 (PFAM);G3DSA:3.30.40.10 (GENE3D);G3DSA:2.30.280.10 (GENE3D);PF00097 (PFAM);PTHR14140 (PANTHER);PS00518 (PROSITE_PATTERNS);PS01359 (PROSITE_PATTERNS);PS50016 (PROSITE_PROFILES);PS50089 (PROSITE_PROFILES);PS50089 (PROSITE_PROFILES);PS51015 (PROSITE_PROFILES);SSF57850 (SUPERFAMILY);SSF57850 …	GO:0042393;GO:0008270/GO:0005515;GO:0008270/GO:0005515;GO:0042393;GO:0042393;GO:0046872;GO:0005515;GO:0008270/GO:0005515;GO:0008270/GO:0005515;GO:0042393	histone binding;zinc ion binding/protein binding;zinc ion binding/protein binding;histone binding;histone binding;metal ion binding;protein binding;zinc ion binding/protein binding;zinc ion binding/protein binding;histone binding	Molecular Function;Molecular Function/Molecular Function;Molecular Function/Molecular Function;Molecular Function;Molecular Function;Molecular Function;Molecular Function;Molecular Function/Molecular Function;Molecular Function/Molecular Function;Molecular Function	MS-DArT_site_12531|MS-DArT_site_12532	0
Eucgr.B03577	Chr02	55599700	55604043	-	PF07082 - Protein of unknown function (DUF1350) (DUF1350) (1 of 2) & Gut esterase 1	GO:0009507 & GO:0016021	3.1.1.1	Carboxylesterase.	PF07082 (PFAM);G3DSA:3.40.50.1820 (GENE3D);PTHR34127 (PANTHER);PTHR34127:SF2 (PANTHER);SIGNAL_PEPTIDE (PHOBIUS);SIGNAL_PEPTIDE_C_REGION (PHOBIUS);NON_CYTOPLASMIC_DOMAIN (PHOBIUS);SIGNAL_PEPTIDE_N_REGION (PHOBIUS);SIGNAL_PEPTIDE_H_REGION (PHOBIUS);SSF53474 (SUPERFAMILY)				MS-DArT_site_12569	0
Eucgr.B03593	Chr02	55703303	55708443	+	PTHR11353:SF8 - CHAPERONIN 60 SUBUNIT BETA 1, CHLOROPLASTIC-RELATED (1 of 1) & ru large subunit-binding subunit chloroplastic	GO:0005524 & GO:0005737 & GO:0042026			Coil (COILS);Coil (COILS);PR00298 (PRINTS);PF00118 (PFAM);G3DSA:3.50.7.10 (GENE3D);G3DSA:1.10.560.10 (GENE3D);G3DSA:1.10.560.10 (GENE3D);TIGR02348 (TIGRFAM);PTHR11353 (PANTHER);PTHR11353:SF8 (PANTHER);PS00296 (PROSITE_PATTERNS);SIGNAL_PEPTIDE_N_REGION (PHOBIUS);NON_CYTOPLASMIC_DOMAIN (PHOBIUS);SIGNAL_PEPTIDE_H_REGION (PHOBIUS);SIGNAL_PEPTIDE (PHOBIUS);SIGNAL_PEPTIDE_C_REGION (PHOBIUS);MF_00600 (H…	GO:0005737/GO:0042026;GO:0005524;GO:0005737/GO:0042026;GO:0006457/GO:0005524/GO:0005737;GO:0005737/GO:0042026	cytoplasm/protein refolding;ATP binding;cytoplasm/protein refolding;protein folding/ATP binding/cytoplasm;cytoplasm/protein refolding	Cellular Component/Biological Process;Molecular Function;Cellular Component/Biological Process;Biological Process/Molecular Function/Cellular Component;Cellular Component/Biological Process	MS-DArT_site_12582|MS-DArT_site_12583	0
Eucgr.B03594	Chr02	55713910	55719219	+	KOG2049 - Translational repressor MPT5/PUF4 and related RNA-binding proteins (Puf superfamily) (1 of 1) & pumilio homolog 12 isoform X1	GO:0003723			SM00025 (SMART);PF00806 (PFAM);G3DSA:1.25.10.10 (GENE3D);PTHR12537 (PANTHER);PTHR12537:SF13 (PANTHER);PS50302 (PROSITE_PROFILES);PS50302 (PROSITE_PROFILES);PS50302 (PROSITE_PROFILES);PS50302 (PROSITE_PROFILES);PS50303 (PROSITE_PROFILES);PS50302 (PROSITE_PROFILES);PS50302 (PROSITE_PROFILES);PS50302 (PROSITE_PROFILES);PS50302 (PROSITE_PROFILES);SSF48371 (SUPERFAMILY)	GO:0003723;GO:0003723;GO:0003723;GO:0003723;GO:0003723;GO:0003723;GO:0003723;GO:0003723;GO:0003723;GO:0003723;GO:0003723;GO:0005488	RNA binding;RNA binding;RNA binding;RNA binding;RNA binding;RNA binding;RNA binding;RNA binding;RNA binding;RNA binding;RNA binding;binding	Molecular Function;Molecular Function;Molecular Function;Molecular Function;Molecular Function;Molecular Function;Molecular Function;Molecular Function;Molecular Function;Molecular Function;Molecular Function;Molecular Function	MS-DArT_site_12588	0
Eucgr.B03606	Chr02	55820912	55823005	+	PTHR10641//PTHR10641:SF455 - MYB-LIKE DNA-BINDING PROTEIN MYB // SUBFAMILY NOT NAMED (1 of 3) & transcription repressor MYB5-like	GO:0003677			SM00717 (SMART);G3DSA:1.10.10.60 (GENE3D);PF00249 (PFAM);G3DSA:1.10.10.60 (GENE3D);PTHR10641 (PANTHER);PTHR10641:SF455 (PANTHER);PS51294 (PROSITE_PROFILES);PS51294 (PROSITE_PROFILES);SSF46689 (SUPERFAMILY)	GO:0003677;GO:0003677;GO:0003677	DNA binding;DNA binding;DNA binding	Molecular Function;Molecular Function;Molecular Function	MS-DArT_site_12606	0
Eucgr.B03621	Chr02	55950733	55956871	+	K11594 - ATP-dependent RNA helicase DDX3X (DDX3X, bel) (1 of 3) & DEAD-box ATP-dependent RNA helicase 37-like	GO:0005524, GO:0003676 & GO:0003676 & GO:0005524 & GO:0010501 & GO:0004004	3.6.4.13 & 3.6.1 & 3.6.1.3 & 2.7.7 & 3.6.1.15	RNA helicase. & Acting on acid anhydrides & Adenosinetriphosphatase & Transferring phosphorus-containing groups & Nucleoside-triphosphate phosphatase	SM00487 (SMART);SM00490 (SMART);PF00271 (PFAM);G3DSA:3.40.50.300 (GENE3D);G3DSA:3.40.50.300 (GENE3D);PF00270 (PFAM);PTHR24031 (PANTHER);PTHR24031:SF235 (PANTHER);PS51194 (PROSITE_PROFILES);PS51192 (PROSITE_PROFILES);PS51195 (PROSITE_PROFILES);SSF52540 (SUPERFAMILY)	GO:0003676/GO:0005524	nucleic acid binding/ATP binding	Molecular Function/Molecular Function	MS-DArT_site_12636	0
Eucgr.B03640	Chr02	56050813	56088154	-	PTHR12741:SF12 - CALLOSE SYNTHASE 9 (1 of 1) & callose synthase 9	GO:0016020, GO:0006075, GO:0003843, GO:0000148 & GO:0003843 & GO:0006075 & GO:0016021 & GO:0000148	2.4.1.34 & 2.4.1	1,3-beta-glucan synthase. & 1,3-beta-glucan synthase & Glycosyltransferases	SM01205 (SMART);PF14288 (PFAM);PF02364 (PFAM);PTHR12741:SF12 (PANTHER);PTHR12741 (PANTHER);TRANSMEMBRANE (PHOBIUS);TRANSMEMBRANE (PHOBIUS);TRANSMEMBRANE (PHOBIUS);CYTOPLASMIC_DOMAIN (PHOBIUS);NON_CYTOPLASMIC_DOMAIN (PHOBIUS);TRANSMEMBRANE (PHOBIUS);CYTOPLASMIC_DOMAIN (PHOBIUS);TRANSMEMBRANE (PHOBIUS);CYTOPLASMIC_DOMAIN (PHOBIUS);TRANSMEMBRANE (PHOBIUS);TRANSMEMBRANE (PHOBIUS);TRANSMEMBRANE (PHOBI…	GO:0003843/GO:0000148/GO:0016020/GO:0006075	1,3-beta-D-glucan synthase activity/1,3-beta-D-glucan synthase complex/membrane/(1->3)-beta-D-glucan biosynthetic process	Molecular Function/Cellular Component/Cellular Component/Biological Process	MS-DArT_site_12662,MS-DArT_site_12664	0,0
Eucgr.B03662	Chr02	56363355	56376410	+	PTHR10871:SF4 - DNA TOPOISOMERASE 6 SUBUNIT B (1 of 1) & DNA topoisomerase 6 subunit B	GO:0006265, GO:0003918, GO:0003677, GO:0005524 & GO:0042802 & GO:0009330 & GO:0000902 & GO:0007389 & GO:0042023 & GO:0042254 & GO:0009741 & GO:0006265 & GO:0006412 & GO:0005634 & GO:0003677 & GO:0005524 & GO:0005829 & GO:0015935 & GO:0003918 & GO:0010026	5.99.1.3 & 3.6.1 & 3.6.1.3 & 5.99.1 & 3.6.1.15	DNA topoisomerase (ATP-hydrolyzing). & Acting on acid anhydrides & Adenosinetriphosphatase & Other isomerases & DNA topoisomerase (ATP-hydrolyzing) & Nucleoside-triphosphate phosphatase	Coil (COILS);G3DSA:3.30.565.10 (GENE3D);PF02518 (PFAM);G3DSA:3.30.230.10 (GENE3D);PF09239 (PFAM);G3DSA:1.10.8.50 (GENE3D);PTHR10871:SF4 (PANTHER);PTHR10871 (PANTHER);PD013790 (PRODOM);MF_00322 (HAMAP);SSF54211 (SUPERFAMILY);SSF55874 (SUPERFAMILY);SSF46946 (SUPERFAMILY)	GO:0006265/GO:0003918/GO:0003677;GO:0003918/GO:0003677/GO:0005524/GO:0006265;GO:0006265/GO:0003918/GO:0003677;GO:0003918/GO:0003677/GO:0005524/GO:0006265;GO:0003676	DNA topological change/DNA topoisomerase type II (ATP-hydrolyzing) activity/DNA binding;DNA topoisomerase type II (ATP-hydrolyzing) activity/DNA binding/ATP binding/DNA topological change;DNA topological change/DNA topoisomerase type II (ATP-hydrolyzing) activity/DNA binding;DNA topoisomerase type II (ATP-hydrolyzing) activity/DNA binding/ATP binding/DNA topological change;nucleic acid binding	Biological Process/Molecular Function/Molecular Function;Molecular Function/Molecular Function/Molecular Function/Biological Process;Biological Process/Molecular Function/Molecular Function;Molecular Function/Molecular Function/Molecular Function/Biological Process;Molecular Function	MS-DArT_site_12702,MS-DArT_site_12704	0,0
Eucgr.B03714	Chr02	56827457	56831990	-	PTHR12412 - CAP BINDING PROTEIN (1 of 2) & nuclear cap-binding subunit 1	GO:0005515, GO:0003723, GO:0051028, GO:0045292, GO:0005846, GO:0000339 & GO:0005634 & GO:0005846 & GO:0045292 & GO:0000394 & GO:0009737 & GO:0031053 & GO:0048574 & GO:0000339 & GO:0051028			SM00543 (SMART);PF02854 (PFAM);G3DSA:1.25.40.180 (GENE3D);PTHR12412 (PANTHER);SSF48371 (SUPERFAMILY)	GO:0003723/GO:0005515;GO:0003723/GO:0005515;GO:0000339/GO:0005846/GO:0051028/GO:0045292;GO:0005488	RNA binding/protein binding;RNA binding/protein binding;RNA cap binding/nuclear cap binding complex/mRNA transport/mRNA cis splicing, via spliceosome;binding	Molecular Function/Molecular Function;Molecular Function/Molecular Function;Molecular Function/Cellular Component/Biological Process/Biological Process;Molecular Function	MS-DArT_site_12818	0
Eucgr.B03722	Chr02	56865087	56869193	+	KOG2922 - Uncharacterized conserved protein (1 of 7) & probable magnesium transporter NIPA6 isoform X1	GO:0016021, GO:0015693, GO:0015095 & GO:0015693 & GO:0016021 & GO:0015095 & GO:1903830			PF05653 (PFAM);PTHR12570 (PANTHER);PTHR12570:SF19 (PANTHER);TRANSMEMBRANE (PHOBIUS);CYTOPLASMIC_DOMAIN (PHOBIUS);TRANSMEMBRANE (PHOBIUS);TRANSMEMBRANE (PHOBIUS);NON_CYTOPLASMIC_DOMAIN (PHOBIUS);CYTOPLASMIC_DOMAIN (PHOBIUS);TRANSMEMBRANE (PHOBIUS);TRANSMEMBRANE (PHOBIUS);NON_CYTOPLASMIC_DOMAIN (PHOBIUS);TRANSMEMBRANE (PHOBIUS);CYTOPLASMIC_DOMAIN (PHOBIUS);TRANSMEMBRANE (PHOBIUS);NON_CYTOPLASMIC_DO…	GO:0015095/GO:0015693/GO:0016021;GO:0015095/GO:0015693/GO:0016021	magnesium ion transmembrane transporter activity/magnesium ion transport/integral component of membrane;magnesium ion transmembrane transporter activity/magnesium ion transport/integral component of membrane	Molecular Function/Biological Process/Cellular Component;Molecular Function/Biological Process/Cellular Component	MS-DArT_site_12825	0
Eucgr.B03731	Chr02	56910296	56912760	+	PF13639 - Ring finger domain (zf-RING_2) (1 of 200) & RING U-box superfamily isoform 1	, GO:0008270, GO:0005515 & GO:0008270			SM00184 (SMART);G3DSA:3.30.40.10 (GENE3D);PF13639 (PFAM);PS00518 (PROSITE_PATTERNS);PS50089 (PROSITE_PROFILES);SSF57850 (SUPERFAMILY)	GO:0008270/GO:0005515;GO:0008270/GO:0005515;GO:0008270/GO:0005515	zinc ion binding/protein binding;zinc ion binding/protein binding;zinc ion binding/protein binding	Molecular Function/Molecular Function;Molecular Function/Molecular Function;Molecular Function/Molecular Function	MS-DArT_site_12845	0
Eucgr.B03733	Chr02	56921062	56930535	-	PTHR23115:SF184 - TRANSLATION INITIATION FACTOR IF-2, MITOCHONDRIAL (1 of 2) & translation initiation factor partial	GO:0005525 & GO:0003743 & GO:0003924 & GO:0006413 & GO:0005622	3.6.5.3 & 3.6.1 & 3.6.1.15	Protein-synthesizing GTPase. & Acting on acid anhydrides & Nucleoside-triphosphate phosphatase	PF00009 (PFAM);G3DSA:2.40.30.10 (GENE3D);PF11987 (PFAM);TIGR00231 (TIGRFAM);G3DSA:2.40.30.10 (GENE3D);G3DSA:3.40.50.10050 (GENE3D);TIGR00487 (TIGRFAM);G3DSA:3.40.50.300 (GENE3D);PTHR23115 (PANTHER);PTHR23115:SF184 (PANTHER);PS51722 (PROSITE_PROFILES);MF_00100_B (HAMAP);SSF52156 (SUPERFAMILY);SSF50447 (SUPERFAMILY);SSF50447 (SUPERFAMILY);SSF52540 (SUPERFAMILY)	GO:0005525;GO:0005622/GO:0005525/GO:0006413/GO:0003743;GO:0003924/GO:0005525;GO:0005622/GO:0005525/GO:0006413/GO:0003743	GTP binding;intracellular/GTP binding/translational initiation/translation initiation factor activity;GTPase activity/GTP binding;intracellular/GTP binding/translational initiation/translation initiation factor activity	Molecular Function;Cellular Component/Molecular Function/Biological Process/Molecular Function;Molecular Function/Molecular Function;Cellular Component/Molecular Function/Biological Process/Molecular Function	MS-DArT_site_12850	0
Eucgr.B03736	Chr02	56942572	56957373	-	PTHR23176//PTHR23176:SF44 - RHO/RAC/CDC GTPASE-ACTIVATING PROTEIN // SUBFAMILY NOT NAMED (1 of 1) & rho GTPase-activating 7	GO:0007165 & GO:0005737 & GO:0005096 & GO:0043547			Coil (COILS);Coil (COILS);Coil (COILS);Coil (COILS);SM00324 (SMART);SM00233 (SMART);PF14389 (PFAM);PF00620 (PFAM);G3DSA:2.30.29.30 (GENE3D);PF00169 (PFAM);G3DSA:1.10.555.10 (GENE3D);PTHR23176:SF44 (PANTHER);PTHR23176:SF44 (PANTHER);PTHR23176 (PANTHER);PTHR23176 (PANTHER);PS50003 (PROSITE_PROFILES);PS50238 (PROSITE_PROFILES);SSF50729 (SUPERFAMILY);SSF48350 (SUPERFAMILY)	GO:0007165;GO:0007165;GO:0007165;GO:0007165;GO:0007165	signal transduction;signal transduction;signal transduction;signal transduction;signal transduction	Biological Process;Biological Process;Biological Process;Biological Process;Biological Process	MS-DArT_site_12857,MS-DArT_site_12854	0,0
Eucgr.B03772	Chr02	57195923	57200915	+	K12176 - COP9 signalosome complex subunit 2 (COPS2, CSN2, TRIP15) (1 of 1) & COP9 signalosome complex subunit 2	GO:0005515, & GO:0005829 & GO:0000502 & GO:0010388			SM00088 (SMART);SM00753 (SMART);PF01399 (PFAM);G3DSA:1.10.10.10 (GENE3D);G3DSA:1.25.40.10 (GENE3D);PTHR10678 (PANTHER);SSF46785 (SUPERFAMILY)	GO:0005515;GO:0005515;GO:0005515	protein binding;protein binding;protein binding	Molecular Function;Molecular Function;Molecular Function	MS-DArT_site_12899	0
Eucgr.B03776	Chr02	57229113	57238749	-	KOG2615 - Permease of the major facilitator superfamily (1 of 8) & probable peptide nitrate transporter At3g43790 isoform X1	GO:0055085, GO:0016021, GO:0022857 & GO:0055085 & GO:0016021 & GO:0005215			PR01035 (PRINTS);G3DSA:1.20.1250.20 (GENE3D);PF07690 (PFAM);PTHR23504 (PANTHER);PTHR23504:SF21 (PANTHER);NON_CYTOPLASMIC_DOMAIN (PHOBIUS);CYTOPLASMIC_DOMAIN (PHOBIUS);NON_CYTOPLASMIC_DOMAIN (PHOBIUS);CYTOPLASMIC_DOMAIN (PHOBIUS);TRANSMEMBRANE (PHOBIUS);TRANSMEMBRANE (PHOBIUS);NON_CYTOPLASMIC_DOMAIN (PHOBIUS);TRANSMEMBRANE (PHOBIUS);NON_CYTOPLASMIC_DOMAIN (PHOBIUS);TRANSMEMBRANE (PHOBIUS);CYTOPLAS…	GO:0005215;GO:0016021/GO:0055085	transporter activity;integral component of membrane/transmembrane transport	Molecular Function;Cellular Component/Biological Process	MS-DArT_site_12908	0
Eucgr.B03778	Chr02	57244456	57256232	+	PTHR22792:SF68 - LA-RELATED PROTEIN 1A (1 of 1) & la-related 1A isoform X1				SM00715 (SMART);SM00684 (SMART);PF05383 (PFAM);G3DSA:1.10.10.10 (GENE3D);PTHR22792:SF68 (PANTHER);PTHR22792 (PANTHER);PS50961 (PROSITE_PROFILES);SSF46785 (SUPERFAMILY)				MS-DArT_site_12916	0
Eucgr.B03780	Chr02	57257684	57264445	-	PTHR22891:SF20 - PROTEIN ARGONAUTE 4-RELATED (1 of 5) & argonaute 4	GO:0005515, GO:0003676 & GO:0003676			SM01163 (SMART);SM00950 (SMART);PF02170 (PFAM);PF16487 (PFAM);G3DSA:2.170.260.10 (GENE3D);PF16486 (PFAM);G3DSA:3.30.420.10 (GENE3D);G3DSA:3.40.50.2300 (GENE3D);PF08699 (PFAM);PF16488 (PFAM);PF02171 (PFAM);PTHR22891 (PANTHER);PTHR22891:SF20 (PANTHER);PS50822 (PROSITE_PROFILES);PS50821 (PROSITE_PROFILES);SSF101690 (SUPERFAMILY);SSF53098 (SUPERFAMILY)	GO:0003676;GO:0005515;GO:0003676;GO:0003676;GO:0003676;GO:0005515;GO:0005515;GO:0003676	nucleic acid binding;protein binding;nucleic acid binding;nucleic acid binding;nucleic acid binding;protein binding;protein binding;nucleic acid binding	Molecular Function;Molecular Function;Molecular Function;Molecular Function;Molecular Function;Molecular Function;Molecular Function;Molecular Function	MS-DArT_site_12919	0
Eucgr.B03783	Chr02	57297520	57302690	-	PF04783 - Protein of unknown function (DUF630) (DUF630) (1 of 11) & PREDICTED: uncharacterized protein LOC104433923				PF04783 (PFAM);PF04782 (PFAM);PTHR21450 (PANTHER);PTHR21450:SF6 (PANTHER)				MS-DArT_site_12926	0
Eucgr.B03800	Chr02	57390314	57404299	-	K11838 - ubiquitin carboxyl-terminal hydrolase 7 (USP7, UBP15) (1 of 4) & ubiquitin carboxyl-terminal hydrolase 13-like isoform X1	GO:0005515 & GO:0016579 & GO:0036459 & GO:0006511	3.4.19.12 & 3.4	Ubiquitinyl hydrolase 1. & Acting on peptide bonds (peptidases) & Ubiquitinyl hydrolase 1	Coil (COILS);SM00061 (SMART);PF12436 (PFAM);G3DSA:2.60.210.10 (GENE3D);PF00443 (PFAM);PF14533 (PFAM);G3DSA:2.20.210.10 (GENE3D);PF00917 (PFAM);PTHR24006:SF445 (PANTHER);PTHR24006 (PANTHER);PS00972 (PROSITE_PATTERNS);PS00973 (PROSITE_PATTERNS);PS50144 (PROSITE_PROFILES);PS50235 (PROSITE_PROFILES);SSF49599 (SUPERFAMILY);SSF54001 (SUPERFAMILY)	GO:0005515;GO:0005515;GO:0036459/GO:0016579;GO:0005515;GO:0036459/GO:0006511;GO:0036459/GO:0006511;GO:0005515;GO:0005515	protein binding;protein binding;thiol-dependent ubiquitinyl hydrolase activity/protein deubiquitination;protein binding;thiol-dependent ubiquitinyl hydrolase activity/ubiquitin-dependent protein catabolic process;thiol-dependent ubiquitinyl hydrolase activity/ubiquitin-dependent protein catabolic process;protein binding;protein binding	Molecular Function;Molecular Function;Molecular Function/Biological Process;Molecular Function;Molecular Function/Biological Process;Molecular Function/Biological Process;Molecular Function;Molecular Function	MS-DArT_site_12955|MS-DArT_site_12956	0
Eucgr.B03811	Chr02	57502176	57508119	+	PTHR32295:SF12 - PROTEIN IQ-DOMAIN 15-RELATED (1 of 2) & IQ-DOMAIN 1 isoform X1	GO:0005515			SM00015 (SMART);PF00612 (PFAM);PTHR32295:SF12 (PANTHER);PTHR32295 (PANTHER);PS50096 (PROSITE_PROFILES)	GO:0005515;GO:0005515;GO:0005515	protein binding;protein binding;protein binding	Molecular Function;Molecular Function;Molecular Function	MS-DArT_site_12976|MS-DArT_site_12977	0
Eucgr.B03812	Chr02	57519928	57531606	+	PTHR11668//PTHR11668:SF243 - SERINE/THREONINE PROTEIN PHOSPHATASE // SUBFAMILY NOT NAMED (1 of 2) & serine threonine- phosphatase BSL3	GO:0005515, GO:0016787 & GO:0004721 & GO:0006470 & GO:0009742	3.1.3.16 & 3.1 & 3.1.3.41	Phosphoprotein phosphatase. & Protein-serine/threonine phosphatase & Acting on ester bonds & 4-nitrophenylphosphatase	PR00114 (PRINTS);SM00156 (SMART);G3DSA:2.120.10.80 (GENE3D);PF13418 (PFAM);PIRSF036363 (PIRSF);PF07646 (PFAM);PF00149 (PFAM);G3DSA:3.60.21.10 (GENE3D);PTHR11668:SF243 (PANTHER);PTHR11668 (PANTHER);PS00125 (PROSITE_PATTERNS);SSF56300 (SUPERFAMILY);SSF117281 (SUPERFAMILY)	GO:0016787;GO:0016787;GO:0005515;GO:0004721/GO:0009742;GO:0005515;GO:0016787;GO:0016787	hydrolase activity;hydrolase activity;protein binding;phosphoprotein phosphatase activity/brassinosteroid mediated signaling pathway;protein binding;hydrolase activity;hydrolase activity	Molecular Function;Molecular Function;Molecular Function;Molecular Function/Biological Process;Molecular Function;Molecular Function;Molecular Function	MS-DArT_site_12983|MS-DArT_site_12984,MS-DArT_site_12987,MS-DArT_site_12985	0,0,0
Eucgr.B03826	Chr02	57623175	57628845	-	K12611 - mRNA-decapping enzyme 1B (DCP1B) (1 of 2) & mRNA-decapping enzyme	GO:0031087 & GO:0043085 & GO:0016021 & GO:0000290 & GO:0000932 & GO:0003729 & GO:0008047 & GO:0016787			PF06058 (PFAM);G3DSA:2.30.29.30 (GENE3D);PTHR16290:SF3 (PANTHER);PTHR16290 (PANTHER);SSF50729 (SUPERFAMILY)	GO:0043085/GO:0000290/GO:0008047;GO:0043085/GO:0000290/GO:0008047	positive regulation of catalytic activity/deadenylation-dependent decapping of nuclear-transcribed mRNA/enzyme activator activity;positive regulation of catalytic activity/deadenylation-dependent decapping of nuclear-transcribed mRNA/enzyme activator activity	Biological Process/Biological Process/Molecular Function;Biological Process/Biological Process/Molecular Function	MS-DArT_site_13014|MS-DArT_site_13015	0
Eucgr.B03848	Chr02	57755967	57759330	-	K14763 - H/ACA ribonucleoprotein complex non-core subunit NAF1 (NAF1) (1 of 1) & H ACA ribonucleo complex non-core subunit NAF1	GO:0042254, GO:0001522 & GO:0001522 & GO:0042254			PF04410 (PFAM);G3DSA:2.40.10.230 (GENE3D);PTHR31633 (PANTHER);SSF50447 (SUPERFAMILY)	GO:0042254/GO:0001522	ribosome biogenesis/pseudouridine synthesis	Biological Process/Biological Process	MS-DArT_site_13046	0
Eucgr.B03852	Chr02	57776365	57780913	-	PTHR10766:SF60 - SYNTAXIN OF PLANT 111 (1 of 1) & transmembrane 9 superfamily member 5 isoform X1	GO:0016021			PF02990 (PFAM);PTHR10766 (PANTHER);PTHR10766:SF60 (PANTHER);TRANSMEMBRANE (PHOBIUS);NON_CYTOPLASMIC_DOMAIN (PHOBIUS);CYTOPLASMIC_DOMAIN (PHOBIUS);CYTOPLASMIC_DOMAIN (PHOBIUS);TRANSMEMBRANE (PHOBIUS);TRANSMEMBRANE (PHOBIUS);CYTOPLASMIC_DOMAIN (PHOBIUS);NON_CYTOPLASMIC_DOMAIN (PHOBIUS);NON_CYTOPLASMIC_DOMAIN (PHOBIUS);TRANSMEMBRANE (PHOBIUS);TRANSMEMBRANE (PHOBIUS);SIGNAL_PEPTIDE (PHOBIUS);SIGNAL_P…	GO:0016021;GO:0016021	integral component of membrane;integral component of membrane	Cellular Component;Cellular Component	MS-DArT_site_13054	0
Eucgr.B03866	Chr02	57893112	57898408	-	PTHR10992:SF886 - ALPHA/BETA-HYDROLASES SUPERFAMILY PROTEIN (1 of 2), & anthocyanidin 5,3-O-glucosyltransferase	GO:0016758 & GO:0008152 & GO:0016021 & GO:0016787	3.1.1.1	Carboxylesterase.	PF12697 (PFAM);G3DSA:3.40.50.1820 (GENE3D);PTHR10992 (PANTHER);PTHR10992:SF886 (PANTHER);TRANSMEMBRANE (PHOBIUS);CYTOPLASMIC_DOMAIN (PHOBIUS);NON_CYTOPLASMIC_DOMAIN (PHOBIUS);SSF53474 (SUPERFAMILY)				MS-DArT_site_13075	0
Eucgr.B03882	Chr02	58032562	58052371	-	K02324 - DNA polymerase epsilon subunit 1 (POLE1) (1 of 1) & DNA polymerase epsilon catalytic subunit A-like	GO:0003677, GO:0000166, GO:0008408, GO:0008270, GO:0006260, GO:0005634, GO:0003887 & GO:0000166 & GO:0003677 & GO:0008408 & GO:0006281 & GO:0090305 & GO:0003887 & GO:0008270 & GO:0006260 & GO:0071897 & GO:0008622	2.7.7.7 & 3.1	DNA-directed DNA polymerase. & Acting on ester bonds & DNA-directed DNA polymerase	SM01159 (SMART);SM00486 (SMART);G3DSA:3.30.420.10 (GENE3D);PF08490 (PFAM);PF00136 (PFAM);PF03104 (PFAM);PTHR10670 (PANTHER);SSF53098 (SUPERFAMILY);SSF56672 (SUPERFAMILY)	GO:0003887/GO:0008270/GO:0006260/GO:0005634;GO:0003676/GO:0000166/GO:0003887;GO:0003676;GO:0003887/GO:0008270/GO:0006260/GO:0005634;GO:0003677/GO:0000166;GO:0008408;GO:0006260/GO:0006281/GO:0003887/GO:0003677/GO:0008622;GO:0003676	DNA-directed DNA polymerase activity/zinc ion binding/DNA replication/nucleus;nucleic acid binding/nucleotide binding/DNA-directed DNA polymerase activity;nucleic acid binding;DNA-directed DNA polymerase activity/zinc ion binding/DNA replication/nucleus;DNA binding/nucleotide binding;3'-5' exonuclease activity;DNA replication/DNA repair/DNA-directed DNA polymerase activity/DNA binding/epsilon DNA…	Molecular Function/Molecular Function/Biological Process/Cellular Component;Molecular Function/Molecular Function/Molecular Function;Molecular Function;Molecular Function/Molecular Function/Biological Process/Cellular Component;Molecular Function/Molecular Function;Molecular Function;Biological Process/Biological Process/Molecular Function/Molecular Function/Cellular Component;Molecular Function	MS-DArT_site_13108	0
Eucgr.B03905	Chr02	58233171	58236316	-	K08832 - serine/threonine-protein kinase SRPK3 [EC:2.7.11.1] (SRPK3, STK23) (1 of 3) & serine threonine- kinase SRPK-like	GO:0006468, GO:0005524, GO:0004672 & GO:0005524 & GO:0004674 & GO:0006468	2.7.11.1 & 2.7.11	Non-specific serine/threonine protein kinase. & Transferring phosphorus-containing groups	SM00220 (SMART);PF00069 (PFAM);G3DSA:1.10.510.10 (GENE3D);G3DSA:3.30.200.20 (GENE3D);PTHR24055:SF228 (PANTHER);PTHR24055 (PANTHER);PTHR24055 (PANTHER);PTHR24055:SF228 (PANTHER);PS00108 (PROSITE_PATTERNS);PS50011 (PROSITE_PROFILES);SSF56112 (SUPERFAMILY)	GO:0006468/GO:0005524/GO:0004672;GO:0006468/GO:0005524/GO:0004672;GO:0006468/GO:0004672;GO:0006468/GO:0005524/GO:0004672	protein phosphorylation/ATP binding/protein kinase activity;protein phosphorylation/ATP binding/protein kinase activity;protein phosphorylation/protein kinase activity;protein phosphorylation/ATP binding/protein kinase activity	Biological Process/Molecular Function/Molecular Function;Biological Process/Molecular Function/Molecular Function;Biological Process/Molecular Function;Biological Process/Molecular Function/Molecular Function	MS-DArT_site_13160|MS-DArT_site_13161	0
Eucgr.B03912	Chr02	58308315	58323491	+	PTHR13258:SF0 - COILED-COIL DOMAIN-CONTAINING PROTEIN 132 (1 of 1) & syndetin isoform X1				PF10475 (PFAM);PF10474 (PFAM);PTHR13258:SF0 (PANTHER);PTHR13258 (PANTHER)				MS-DArT_site_13170,MS-DArT_site_13172	0,0
Eucgr.B03923	Chr02	58449465	58454337	-	PF13966 - zinc-binding in reverse transcriptase (zf-RVT) (1 of 1) & F-box SKIP23-like				PF03478 (PFAM);G3DSA:1.20.1280.50 (GENE3D);PF13966 (PFAM);PF13456 (PFAM);PTHR11102 (PANTHER)				MS-DArT_site_13194	0
Eucgr.B03938	Chr02	58545467	58548727	+	K12193 - charged multivesicular body protein 3 (VPS24, CHMP3) (1 of 1) & vacuolar sorting-associated 24 homolog 1	GO:0007034 & GO:0005622			Coil (COILS);PF03357 (PFAM);PTHR10476 (PANTHER);PTHR10476:SF10 (PANTHER)	GO:0007034	vacuolar transport	Biological Process	MS-DArT_site_13224	0
Eucgr.B03943	Chr02	58589822	58594559	+	PTHR24096:SF236 - PROTEIN ACS-9 (1 of 3) & 4-coumarate-- ligase-like 7	GO:0008152, GO:0003824 & GO:0047077 & GO:0016021 & GO:0055114 & GO:0016874	1.13.12 & 1.13.12.7	Acting on single donors with incorporation of molecular oxygen (oxygenases). The oxygen incorporated need not be derived from O(2) & Photinus-luciferin 4-monooxygenase (ATP-hydrolyzing)	G3DSA:3.40.50.980 (GENE3D);PF13193 (PFAM);G3DSA:3.40.50.980 (GENE3D);PF00501 (PFAM);G3DSA:3.30.300.30 (GENE3D);G3DSA:2.30.38.10 (GENE3D);PTHR24096 (PANTHER);PTHR24096:SF236 (PANTHER);PS00455 (PROSITE_PATTERNS);NON_CYTOPLASMIC_DOMAIN (PHOBIUS);TRANSMEMBRANE (PHOBIUS);CYTOPLASMIC_DOMAIN (PHOBIUS);TRANSMEMBRANE (PHOBIUS);NON_CYTOPLASMIC_DOMAIN (PHOBIUS);SSF56801 (SUPERFAMILY)	GO:0003824/GO:0008152	catalytic activity/metabolic process	Molecular Function/Biological Process	MS-DArT_site_13229	0
Eucgr.B03950	Chr02	58672356	58678669	+	PTHR10788:SF14 - ALPHA,ALPHA-TREHALOSE-PHOSPHATE SYNTHASE [UDP-FORMING] 10-RELATED (1 of 3) & probable alpha,alpha-trehalose-phosphate synthase [UDP-forming] 9	GO:0005992, GO:0003824 & GO:0003825 & GO:0004805 & GO:0005992 & GO:0016311	2.4.1.15, 3.1.3.12 & 2.4.1.15 & 3.1 & 3.1.3.12 & 3.1.3.41 & 2.4.1	Alpha,alpha-trehalose-phosphate synthase (UDP-forming)., Trehalose-phosphatase. & Alpha,alpha-trehalose-phosphate synthase (UDP-forming) & Acting on ester bonds & Trehalose-phosphatase & 4-nitrophenylphosphatase & Glycosyltransferases	PF02358 (PFAM);PF00982 (PFAM);TIGR00685 (TIGRFAM);G3DSA:3.40.50.1000 (GENE3D);TIGR01484 (TIGRFAM);G3DSA:3.40.50.2000 (GENE3D);G3DSA:3.40.50.2000 (GENE3D);PTHR10788 (PANTHER);PTHR10788:SF14 (PANTHER);SSF53756 (SUPERFAMILY);SSF56784 (SUPERFAMILY)	GO:0003824/GO:0005992;GO:0003824/GO:0005992;GO:0003824/GO:0005992	catalytic activity/trehalose biosynthetic process;catalytic activity/trehalose biosynthetic process;catalytic activity/trehalose biosynthetic process	Molecular Function/Biological Process;Molecular Function/Biological Process;Molecular Function/Biological Process	MS-DArT_site_13251	0
Eucgr.B03952	Chr02	58691973	58705760	+	K12391 - AP-1 complex subunit gamma-1 (AP1G1) (1 of 1), & AP-1 complex subunit gamma-2-like	GO:0030131, GO:0016192, GO:0006886, GO:0030117 & GO:0016192 & GO:0030131 & GO:0008565 & GO:0005794 & GO:0006886			SM00809 (SMART);G3DSA:1.25.10.10 (GENE3D);PF01602 (PFAM);PF02883 (PFAM);G3DSA:2.60.40.1230 (GENE3D);PIRSF037094 (PIRSF);PTHR22780 (PANTHER);PTHR22780:SF27 (PANTHER);PTHR22780:SF27 (PANTHER);PS50180 (PROSITE_PROFILES);SSF49348 (SUPERFAMILY);SSF48371 (SUPERFAMILY)	GO:0016192/GO:0030131/GO:0006886;GO:0030117/GO:0006886/GO:0016192;GO:0016192/GO:0030131/GO:0006886;GO:0015031/GO:0005794/GO:0008565;GO:0005488	vesicle-mediated transport/clathrin adaptor complex/intracellular protein transport;membrane coat/intracellular protein transport/vesicle-mediated transport;vesicle-mediated transport/clathrin adaptor complex/intracellular protein transport;protein transport/Golgi apparatus/protein transporter activity;binding	Biological Process/Cellular Component/Biological Process;Cellular Component/Biological Process/Biological Process;Biological Process/Cellular Component/Biological Process;Biological Process/Cellular Component/Molecular Function;Molecular Function	MS-DArT_site_13254,MS-DArT_site_13256|MS-DArT_site_13257	0,0
Eucgr.B03961	Chr02	58794272	58796362	-	PF01535//PF13041 - PPR repeat (PPR) // PPR repeat family (PPR_2) (1 of 235) & pentatricopeptide repeat-containing At4g04370	GO:0016787			PF13041 (PFAM);TIGR00756 (TIGRFAM);PF01535 (PFAM);G3DSA:1.25.40.10 (GENE3D);PTHR24015:SF653 (PANTHER);PTHR24015 (PANTHER);PS51375 (PROSITE_PROFILES)	GO:0005515	protein binding	Molecular Function	MS-DArT_site_13277	0
Eucgr.B03984	Chr02	58973887	58977749	-	PF12899 - Alkaline and neutral invertase (Glyco_hydro_100) (1 of 9) & alkaline neutral invertase mitochondrial	GO:0033926 & GO:0009507	3.2.1.97	Endo-alpha-N-acetylgalactosaminidase	PF12899 (PFAM);PTHR31916 (PANTHER);PTHR31916:SF9 (PANTHER);SSF48208 (SUPERFAMILY)	GO:0033926;GO:0003824	glycopeptide alpha-N-acetylgalactosaminidase activity;catalytic activity	Molecular Function;Molecular Function	MS-DArT_site_13313,MS-DArT_site_13314|MS-DArT_site_13315	0,0
Eucgr.B04005	Chr02	59196310	59200756	+	PTHR10555//PTHR10555:SF155 - SORTING NEXIN // SUBFAMILY NOT NAMED (1 of 1) & sorting nexin 2A	GO:0035091 & GO:0005768 & GO:0016050 & GO:0019898 & GO:0006897			Coil (COILS);Coil (COILS);Coil (COILS);SM00312 (SMART);PF00787 (PFAM);G3DSA:3.30.1520.10 (GENE3D);PF09325 (PFAM);PTHR10555:SF155 (PANTHER);PTHR10555 (PANTHER);PS50195 (PROSITE_PROFILES);SSF64268 (SUPERFAMILY);SSF103657 (SUPERFAMILY)	GO:0035091;GO:0035091;GO:0035091;GO:0035091;GO:0035091	phosphatidylinositol binding;phosphatidylinositol binding;phosphatidylinositol binding;phosphatidylinositol binding;phosphatidylinositol binding	Molecular Function;Molecular Function;Molecular Function;Molecular Function;Molecular Function	MS-DArT_site_13347	0
Eucgr.B04011	Chr02	59247548	59251396	-	K11094 - U2 small nuclear ribonucleoprotein B'' (SNRPB2) (1 of 1) & U2 small nuclear ribonucleo B	GO:0003676, GO:0017069, GO:0000398 & GO:0000166 & GO:0030619 & GO:0019013 & GO:0035614 & GO:0005685 & GO:0000398			Coil (COILS);SM00360 (SMART);PF00076 (PFAM);G3DSA:3.30.70.330 (GENE3D);G3DSA:3.30.70.330 (GENE3D);PTHR10501 (PANTHER);PS50102 (PROSITE_PROFILES);SSF54928 (SUPERFAMILY)	GO:0003676;GO:0003676;GO:0000166;GO:0000166;GO:0000398/GO:0017069;GO:0003676;GO:0000166	nucleic acid binding;nucleic acid binding;nucleotide binding;nucleotide binding;mRNA splicing, via spliceosome/snRNA binding;nucleic acid binding;nucleotide binding	Molecular Function;Molecular Function;Molecular Function;Molecular Function;Biological Process/Molecular Function;Molecular Function;Molecular Function	MS-DArT_site_13361|MS-DArT_site_13362	0
Eucgr.B04027	Chr02	59377453	59385397	-	PF02362//PF07496 - B3 DNA binding domain (B3) // CW-type Zinc Finger (zf-CW) (1 of 3) & B3 domain-containing transcription repressor VAL1-like	GO:0008270, GO:0003677 & GO:0005634 & GO:0003677 & GO:0008270 & GO:0006351 & GO:0006355			SM01019 (SMART);PF07496 (PFAM);PF02362 (PFAM);G3DSA:2.40.330.10 (GENE3D);PTHR23336:SF10 (PANTHER);PTHR23336 (PANTHER);PS50863 (PROSITE_PROFILES);PS51050 (PROSITE_PROFILES);SSF101936 (SUPERFAMILY)	GO:0003677;GO:0008270;GO:0003677;GO:0003677;GO:0008270	DNA binding;zinc ion binding;DNA binding;DNA binding;zinc ion binding	Molecular Function;Molecular Function;Molecular Function;Molecular Function;Molecular Function	MS-DArT_site_13393	0
Eucgr.C00062	Chr03	228990	235766	-	PTHR12225 - ADHESION REGULATING MOLECULE 1 110 KDA CELL MEMBRANE GLYCOPROTEIN (1 of 1) & 26S proteasome regulatory subunit RPN13	GO:0005737, GO:0005634 & GO:0005634 & GO:0005737			PF04683 (PFAM);PF16550 (PFAM);PTHR12225 (PANTHER)	GO:0005634/GO:0005737;GO:0005634/GO:0005737	nucleus/cytoplasm;nucleus/cytoplasm	Cellular Component/Cellular Component;Cellular Component/Cellular Component	MS-DArT_site_13429	0
Eucgr.C00066	Chr03	250472	261108	-	K12598 - ATP-dependent RNA helicase DOB1 (MTR4, SKIV2L2) (1 of 2) & D -box ATP-dependent RNA helicase D 10 isoform X1	GO:0005524, GO:0003676 & GO:0005524 & GO:0003723 & GO:0003724 & GO:0010093 & GO:0005829 & GO:0005654 & GO:0006401	3.6.4.13 & 3.6.1 & 2.7.7 & 3.6.1.15	RNA helicase. & Acting on acid anhydrides & Transferring phosphorus-containing groups & Nucleoside-triphosphate phosphatase	Coil (COILS);Coil (COILS);SM01142 (SMART);SM00487 (SMART);SM00490 (SMART);PIRSF005198 (PIRSF);PF13234 (PFAM);PF00270 (PFAM);G3DSA:3.40.50.300 (GENE3D);PF00271 (PFAM);PF08148 (PFAM);G3DSA:3.40.50.300 (GENE3D);PS51192 (PROSITE_PROFILES);PS51194 (PROSITE_PROFILES);SSF52540 (SUPERFAMILY)	GO:0003723/GO:0006401/GO:0003724;GO:0005524/GO:0003676	RNA binding/RNA catabolic process/RNA helicase activity;ATP binding/nucleic acid binding	Molecular Function/Biological Process/Molecular Function;Molecular Function/Molecular Function	MS-DArT_site_13437	0
Eucgr.C00069	Chr03	286069	293875	-	K16252 - DNA-directed RNA polymerase IV and V subunit 2 [EC:2.7.7.6] (NRPD2, NRPE2) (1 of 1) & DNA-directed RNA polymerases IV and V subunit 2-like	GO:0006351, GO:0003899, GO:0003677, GO:0032549 & GO:0003677 & GO:0005736 & GO:0001054 & GO:0032549 & GO:0006360	2.7.7.6	DNA-directed RNA polymerase. & DNA-directed RNA polymerase	Coil (COILS);PF04567 (PFAM);PF04563 (PFAM);G3DSA:2.40.270.10 (GENE3D);G3DSA:2.40.50.150 (GENE3D);G3DSA:3.90.1100.10 (GENE3D);G3DSA:3.90.1110.10 (GENE3D);PF04565 (PFAM);PF00562 (PFAM);PF04561 (PFAM);PF04566 (PFAM);PF04560 (PFAM);PTHR20856:SF21 (PANTHER);PTHR20856 (PANTHER);PS01166 (PROSITE_PATTERNS);SSF64484 (SUPERFAMILY)	GO:0006351;GO:0006351/GO:0003677/GO:0003899;GO:0006351/GO:0003899/GO:0003677;GO:0003899;GO:0003899/GO:0003677/GO:0006351;GO:0003899/GO:0003677/GO:0006351;GO:0006351/GO:0003899/GO:0003677;GO:0003899/GO:0003677/GO:0006351;GO:0003677/GO:0003899/GO:0006351;GO:0006351/GO:0003899/GO:0003677;GO:0006351/GO:0003899/GO:0032549;GO:0003677/GO:0003899/GO:0006351	transcription, DNA-templated;transcription, DNA-templated/DNA binding/DNA-directed RNA polymerase activity;transcription, DNA-templated/DNA-directed RNA polymerase activity/DNA binding;DNA-directed RNA polymerase activity;DNA-directed RNA polymerase activity/DNA binding/transcription, DNA-templated;DNA-directed RNA polymerase activity/DNA binding/transcription, DNA-templated;transcription, DNA-te…	Biological Process;Biological Process/Molecular Function/Molecular Function;Biological Process/Molecular Function/Molecular Function;Molecular Function;Molecular Function/Molecular Function/Biological Process;Molecular Function/Molecular Function/Biological Process;Biological Process/Molecular Function/Molecular Function;Molecular Function/Molecular Function/Biological Process;Molecular Function/…	MS-DArT_site_13447,MS-DArT_site_13448|MS-DArT_site_13449	0,0
Eucgr.C00095	Chr03	589315	599302	-	PF00122//PF00690//PF12515//PF13246 - E1-E2 ATPase (E1-E2_ATPase) // Cation transporter/ATPase, N-terminus (Cation_ATPase_N) // Ca2+-ATPase N terminal autoinhibitory domain (CaATP_NAI) // Cation transport ATPase (P-type) (Cation_ATPase) (1 of 1) & calcium-transporting ATPase plasma membrane-type	GO:0005516, GO:0046872, GO:0000166 & GO:0005887 & GO:0005524 & GO:0005516 & GO:0046872 & GO:0043231 & GO:0070588 & GO:0005388	3.6.3.8 & 3.6.1 & 3.6.1.3 & 3.6.1.15	Calcium-transporting ATPase. & Acting on acid anhydrides & Adenosinetriphosphatase & Calcium-transporting ATPase & Nucleoside-triphosphate phosphatase	PR00119 (PRINTS);PR00121 (PRINTS);SM00831 (SMART);PF13246 (PFAM);G3DSA:1.20.1110.10 (GENE3D);PF00122 (PFAM);G3DSA:3.40.1110.10 (GENE3D);PF00690 (PFAM);G3DSA:2.70.150.10 (GENE3D);TIGR01494 (TIGRFAM);PF12515 (PFAM);PTHR24093 (PANTHER);PTHR24093:SF359 (PANTHER);PS00154 (PROSITE_PATTERNS);NON_CYTOPLASMIC_DOMAIN (PHOBIUS);CYTOPLASMIC_DOMAIN (PHOBIUS);CYTOPLASMIC_DOMAIN (PHOBIUS);TRANSMEMBRANE (PHOBIUS…	GO:0046872/GO:0000166;GO:0000166;GO:0046872/GO:0000166;GO:0016021;GO:0005516;GO:0000166	metal ion binding/nucleotide binding;nucleotide binding;metal ion binding/nucleotide binding;integral component of membrane;calmodulin binding;nucleotide binding	Molecular Function/Molecular Function;Molecular Function;Molecular Function/Molecular Function;Cellular Component;Molecular Function;Molecular Function	MS-DArT_site_13501	0
Eucgr.C00100	Chr03	653617	665118	+	PF09758 - Uncharacterised conserved protein (FPL) (1 of 2), & CLEC16A like	GO:0009718 & GO:0016192 & GO:1903415 & GO:0005794 & GO:0019898 & GO:0001708 & GO:0044090			PF09758 (PFAM);PTHR21481 (PANTHER);SSF48371 (SUPERFAMILY)	GO:0005488	binding	Molecular Function	MS-DArT_site_13509	0
Eucgr.C00129	Chr03	825938	833425	-	PF02485 - Core-2/I-Branching enzyme (Branch) (1 of 23) & Core-2 I-branching beta-1,6-N-acetylglucosaminyltransferase family	GO:0016020, GO:0008375 & GO:0008375 & GO:0016021	2.4.1	Glycosyltransferases	PF02485 (PFAM);PTHR31042:SF1 (PANTHER);PTHR31042 (PANTHER);NON_CYTOPLASMIC_DOMAIN (PHOBIUS);TRANSMEMBRANE (PHOBIUS);CYTOPLASMIC_DOMAIN (PHOBIUS);TMhelix (TMHMM)	GO:0008375/GO:0016020	acetylglucosaminyltransferase activity/membrane	Molecular Function/Cellular Component	MS-DArT_site_13546	0
Eucgr.C00132	Chr03	924219	929308	-	K17776 - metaxin (MTX) (1 of 1) & mitochondrial outer membrane import complex METAXIN	GO:0006626 & GO:0016021 & GO:0005741 & GO:0005743 & GO:0009536			PF17171 (PFAM);PF17172 (PFAM);PTHR12289:SF38 (PANTHER);PTHR12289 (PANTHER);NON_CYTOPLASMIC_DOMAIN (PHOBIUS);CYTOPLASMIC_DOMAIN (PHOBIUS);TRANSMEMBRANE (PHOBIUS)				MS-DArT_site_13558	0
Eucgr.C00142	Chr03	1054525	1057201	+	2.5.1.61 - Hydroxymethylbilane synthase / Uroporphyrinogen synthetase (1 of 1) & porphobilinogen chloroplastic	GO:0033014, GO:0004418 & GO:0009570 & GO:0018160 & GO:0004418 & GO:0048046 & GO:0009941 & GO:0033014	2.5.1.61	Hydroxymethylbilane synthase. & Hydroxymethylbilane synthase	PR00151 (PRINTS);PF01379 (PFAM);PF03900 (PFAM);TIGR00212 (TIGRFAM);G3DSA:3.40.190.10 (GENE3D);G3DSA:3.30.160.40 (GENE3D);G3DSA:3.40.190.10 (GENE3D);PTHR11557 (PANTHER);PS00533 (PROSITE_PATTERNS);SSF53850 (SUPERFAMILY);SSF54782 (SUPERFAMILY)	GO:0033014/GO:0004418;GO:0004418/GO:0033014;GO:0033014/GO:0004418;GO:0033014/GO:0004418;GO:0033014/GO:0004418;GO:0033014/GO:0004418;GO:0018160/GO:0004418/GO:0033014;GO:0033014/GO:0004418	tetrapyrrole biosynthetic process/hydroxymethylbilane synthase activity;hydroxymethylbilane synthase activity/tetrapyrrole biosynthetic process;tetrapyrrole biosynthetic process/hydroxymethylbilane synthase activity;tetrapyrrole biosynthetic process/hydroxymethylbilane synthase activity;tetrapyrrole biosynthetic process/hydroxymethylbilane synthase activity;tetrapyrrole biosynthetic process/hydro…	Biological Process/Molecular Function;Molecular Function/Biological Process;Biological Process/Molecular Function;Biological Process/Molecular Function;Biological Process/Molecular Function;Biological Process/Molecular Function;Biological Process/Molecular Function/Biological Process;Biological Process/Molecular Function	MS-DArT_site_13570	0
Eucgr.C00144	Chr03	1060774	1067479	+	K12115 - clock-associated PAS protein ZTL (ZTL) (1 of 1) & LOV domain-containing	GO:0005515			PF07646 (PFAM);G3DSA:3.30.450.20 (GENE3D);G3DSA:2.120.10.80 (GENE3D);PF13426 (PFAM);PF13415 (PFAM);TIGR00229 (TIGRFAM);PF12937 (PFAM);G3DSA:1.20.1280.50 (GENE3D);PF13418 (PFAM);PTHR23244 (PANTHER);PTHR23244:SF313 (PANTHER);PS50112 (PROSITE_PROFILES);SSF81383 (SUPERFAMILY);SSF55785 (SUPERFAMILY);SSF50965 (SUPERFAMILY)	GO:0005515;GO:0005515;GO:0005515;GO:0005515	protein binding;protein binding;protein binding;protein binding	Molecular Function;Molecular Function;Molecular Function;Molecular Function	MS-DArT_site_13572,MS-DArT_site_13571	0,0
Eucgr.C00155	Chr03	1172288	1174516	-	K11098 - small nuclear ribonucleoprotein F (SNRPF, SMF) (1 of 1) & probable small nuclear ribonucleo F	GO:0003723 & GO:0071013 & GO:0019013 & GO:0005685 & GO:0005732 & GO:0000398			SM00651 (SMART);G3DSA:2.30.30.100 (GENE3D);PF01423 (PFAM);PIRSF006609 (PIRSF);PTHR11021 (PANTHER);SIGNAL_PEPTIDE_C_REGION (PHOBIUS);SIGNAL_PEPTIDE_H_REGION (PHOBIUS);NON_CYTOPLASMIC_DOMAIN (PHOBIUS);SIGNAL_PEPTIDE_N_REGION (PHOBIUS);SIGNAL_PEPTIDE (PHOBIUS);SSF50182 (SUPERFAMILY)	GO:0005732/GO:0000398	small nucleolar ribonucleoprotein complex/mRNA splicing, via spliceosome	Cellular Component/Biological Process	MS-DArT_site_13588	0
Eucgr.C00188	Chr03	1411587	1419209	-	2.7.1.16 - Ribulokinase / L-ribulokinase (1 of 1), & FGGY carbohydrate kinase domain-containing	GO:0016773, GO:0005975 & GO:0005975 & GO:0009507 & GO:0016310 & GO:0016773 & GO:0016301	2.7.1.16	Ribulokinase.	TIGR01315 (TIGRFAM);G3DSA:3.30.420.40 (GENE3D);G3DSA:3.30.420.40 (GENE3D);PF02782 (PFAM);PF00370 (PFAM);PTHR10196:SF71 (PANTHER);PTHR10196:SF71 (PANTHER);PTHR10196 (PANTHER);SSF53067 (SUPERFAMILY);SSF53067 (SUPERFAMILY)	GO:0005975/GO:0016773;GO:0005975/GO:0016773;GO:0016773/GO:0005975	carbohydrate metabolic process/phosphotransferase activity, alcohol group as acceptor;carbohydrate metabolic process/phosphotransferase activity, alcohol group as acceptor;phosphotransferase activity, alcohol group as acceptor/carbohydrate metabolic process	Biological Process/Molecular Function;Biological Process/Molecular Function;Molecular Function/Biological Process	MS-DArT_site_13607|MS-DArT_site_13608	0
Eucgr.C00220	Chr03	1825845	1829404	-	K02267 - cytochrome c oxidase subunit 6b (COX6B) (1 of 2) & cytochrome c oxidase subunit 6b-2	GO:0005739, GO:0004129 & GO:0004129 & GO:0005739 & GO:1902600 & GO:0055114	1.9.3.1	Cytochrome-c oxidase. & Cytochrome-c oxidase	PF02297 (PFAM);G3DSA:1.10.10.140 (GENE3D);PTHR11387:SF15 (PANTHER);PTHR11387 (PANTHER);PD015172 (PRODOM);SSF47694 (SUPERFAMILY)	GO:0005739/GO:0004129;GO:0005739/GO:0004129;GO:0005739/GO:0004129	mitochondrion/cytochrome-c oxidase activity;mitochondrion/cytochrome-c oxidase activity;mitochondrion/cytochrome-c oxidase activity	Cellular Component/Molecular Function;Cellular Component/Molecular Function;Cellular Component/Molecular Function	MS-DArT_site_13678	0
Eucgr.C00239	Chr03	1994202	2007709	-	PTHR12601:SF9 - TETRATRICOPEPTIDE REPEAT DOMAIN PROTEIN (1 of 1) & TSS				Coil (COILS);SM00028 (SMART);PF13424 (PFAM);PF15044 (PFAM);PF12807 (PFAM);G3DSA:1.25.40.10 (GENE3D);PTHR12601:SF9 (PANTHER);PTHR12601 (PANTHER);PS50293 (PROSITE_PROFILES);PS50005 (PROSITE_PROFILES);SSF48452 (SUPERFAMILY);SSF48452 (SUPERFAMILY)	GO:0005515;GO:0005515;GO:0005515;GO:0005515;GO:0005515;GO:0005515	protein binding;protein binding;protein binding;protein binding;protein binding;protein binding	Molecular Function;Molecular Function;Molecular Function;Molecular Function;Molecular Function;Molecular Function	MS-DArT_site_13705|MS-DArT_site_13706	0
Eucgr.C00241	Chr03	2019657	2026372	-	PTHR13222 - CGTHBA PROTEIN -14 GENE PROTEIN (1 of 1) & autophagy-related 11	GO:0006914 & GO:0000045 & GO:0019901 & GO:0009506 & GO:0034045 & GO:1990316 & GO:0001934			Coil (COILS);Coil (COILS);Coil (COILS);Coil (COILS);Coil (COILS);G3DSA:3.10.20.90 (GENE3D);PF10377 (PFAM);PF04108 (PFAM);PTHR13222 (PANTHER);PTHR13222:SF1 (PANTHER);PTHR13222 (PANTHER);PTHR13222:SF1 (PANTHER);SSF54236 (SUPERFAMILY)	GO:0006914	autophagy	Biological Process	MS-DArT_site_13711	0
Eucgr.C00012	Chr03	2979888	2984516	+	PTHR24423:SF363 - HISTIDINE KINASE 2 (1 of 2) & histidine kinase 3 isoform X2	GO:0000160, GO:0007165, GO:0000155 & GO:0000155 & GO:0000160 & GO:0016021 & GO:0023014 & GO:0005622 & GO:0018106	2.7.13.3 & 2.7.3	Histidine kinase. & Transferring phosphorus-containing groups & Histidine kinase	Coil (COILS);SM00388 (SMART);G3DSA:3.40.50.2300 (GENE3D);PF00072 (PFAM);G3DSA:1.10.287.130 (GENE3D);PF00512 (PFAM);PTHR24423:SF381 (PANTHER);PTHR24423 (PANTHER);PS50110 (PROSITE_PROFILES);SSF47384 (SUPERFAMILY);SSF52172 (SUPERFAMILY)	GO:0000155/GO:0007165;GO:0000160;GO:0000155/GO:0007165;GO:0000155/GO:0007165;GO:0000160;GO:0000155/GO:0007165	phosphorelay sensor kinase activity/signal transduction;phosphorelay signal transduction system;phosphorelay sensor kinase activity/signal transduction;phosphorelay sensor kinase activity/signal transduction;phosphorelay signal transduction system;phosphorelay sensor kinase activity/signal transduction	Molecular Function/Biological Process;Biological Process;Molecular Function/Biological Process;Molecular Function/Biological Process;Biological Process;Molecular Function/Biological Process	MS-DArT_site_13822,MS-DArT_site_13823,MS-DArT_site_13818	0,0,0
Eucgr.C00368	Chr03	5920032	5924659	-	PTHR23344:SF5 - GLYCEROPHOSPHODIESTER PHOSPHODIESTERASE LIKE 6-RELATED (1 of 1) & glycerophosphodiester phosphodiesterase GDPDL7-like	GO:0008081, GO:0006629, GO:0008889 & GO:0006629 & GO:0016021 & GO:0008889	3.1.4.46 & 3.1	Glycerophosphodiester phosphodiesterase. & Acting on ester bonds & Glycerophosphodiester phosphodiesterase	G3DSA:3.20.20.190 (GENE3D);PF03009 (PFAM);PTHR23344 (PANTHER);PTHR23344:SF5 (PANTHER);NON_CYTOPLASMIC_DOMAIN (PHOBIUS);TRANSMEMBRANE (PHOBIUS);CYTOPLASMIC_DOMAIN (PHOBIUS);SIGNAL_PEPTIDE_N_REGION (PHOBIUS);SIGNAL_PEPTIDE_C_REGION (PHOBIUS);SIGNAL_PEPTIDE_H_REGION (PHOBIUS);SIGNAL_PEPTIDE (PHOBIUS);PS51704 (PROSITE_PROFILES);SignalP-noTM (SIGNALP_GRAM_NEGATIVE);SignalP-TM (SIGNALP_GRAM_POSITIVE);S…	GO:0006629/GO:0008081;GO:0008081/GO:0006629;GO:0008889;GO:0008081/GO:0006629;GO:0006629/GO:0008081;GO:0006629/GO:0008081	lipid metabolic process/phosphoric diester hydrolase activity;phosphoric diester hydrolase activity/lipid metabolic process;glycerophosphodiester phosphodiesterase activity;phosphoric diester hydrolase activity/lipid metabolic process;lipid metabolic process/phosphoric diester hydrolase activity;lipid metabolic process/phosphoric diester hydrolase activity	Biological Process/Molecular Function;Molecular Function/Biological Process;Molecular Function;Molecular Function/Biological Process;Biological Process/Molecular Function;Biological Process/Molecular Function	MS-DArT_site_14040	0
Eucgr.C00380	Chr03	6065170	6069823	-	PTHR26402:SF558 - TWO-COMPONENT RESPONSE REGULATOR ARR18 (1 of 2), & two-component response regulator ARR12	GO:0000160 & GO:0005634 & GO:0003677 & GO:0006351 & GO:0006355			SM00448 (SMART);PF00249 (PFAM);G3DSA:3.40.50.2300 (GENE3D);PF00072 (PFAM);TIGR01557 (TIGRFAM);G3DSA:1.10.10.60 (GENE3D);PTHR26402 (PANTHER);PTHR26402:SF558 (PANTHER);PS50110 (PROSITE_PROFILES);PS51294 (PROSITE_PROFILES);SSF46689 (SUPERFAMILY);SSF52172 (SUPERFAMILY)	GO:0000160;GO:0000160;GO:0003677;GO:0000160;GO:0003677	phosphorelay signal transduction system;phosphorelay signal transduction system;DNA binding;phosphorelay signal transduction system;DNA binding	Biological Process;Biological Process;Molecular Function;Biological Process;Molecular Function	MS-DArT_site_14051|MS-DArT_site_14052	0
Eucgr.C00406	Chr03	6481224	6495651	-	PTHR14950:SF15 - DICER-LIKE PROTEIN 4 (1 of 1) & dicer 4 isoform X1	GO:0005515, GO:0005524, GO:0003676, GO:0016891, GO:0006396, GO:0004525, GO:0003723 & GO:0090502 & GO:0005634 & GO:0005524 & GO:0003723 & GO:0004525 & GO:0005737 & GO:0007275 & GO:0051607 & GO:0004386 & GO:0016442 & GO:0030422	3.1.26.3 & 3.1.30 & 3.6.1 & 3.1 & 3.1.26 & 3.6.1.15	Ribonuclease III. & Acting on ester bonds & Acting on acid anhydrides & Ribonuclease III & Nucleoside-triphosphate phosphatase	Coil (COILS);SM00487 (SMART);SM00535 (SMART);SM00949 (SMART);SM00358 (SMART);SM00490 (SMART);PF14709 (PFAM);PF00270 (PFAM);PF02170 (PFAM);PF00636 (PFAM);PF03368 (PFAM);G3DSA:1.10.1520.10 (GENE3D);G3DSA:3.40.50.300 (GENE3D);G3DSA:1.10.1520.10 (GENE3D);G3DSA:3.30.160.20 (GENE3D);PF00271 (PFAM);G3DSA:3.40.50.300 (GENE3D);PTHR14950:SF15 (PANTHER);PTHR14950 (PANTHER);PS00517 (PROSITE_PATTERNS);PS51194…	GO:0004525/GO:0006396;GO:0005515;GO:0005524/GO:0003676;GO:0005515;GO:0004525/GO:0006396;GO:0016891;GO:0004525/GO:0006396;GO:0004525/GO:0006396;GO:0004525/GO:0006396;GO:0004525/GO:0006396;GO:0005515;GO:0016891;GO:0004525/GO:0006396;GO:0004525/GO:0006396;GO:0004525/GO:0006396;GO:0005515	ribonuclease III activity/RNA processing;protein binding;ATP binding/nucleic acid binding;protein binding;ribonuclease III activity/RNA processing;endoribonuclease activity, producing 5'-phosphomonoesters;ribonuclease III activity/RNA processing;ribonuclease III activity/RNA processing;ribonuclease III activity/RNA processing;ribonuclease III activity/RNA processing;protein binding;endoribonuclea…	Molecular Function/Biological Process;Molecular Function;Molecular Function/Molecular Function;Molecular Function;Molecular Function/Biological Process;Molecular Function;Molecular Function/Biological Process;Molecular Function/Biological Process;Molecular Function/Biological Process;Molecular Function/Biological Process;Molecular Function;Molecular Function;Molecular Function/Biological Process;…	MS-DArT_site_14087|MS-DArT_site_14088	0
Eucgr.C00480	Chr03	7312699	7317048	-	K10088 - protein OS-9 (OS9) (1 of 1) & OS-9 homolog	GO:0005788 & GO:0009651 & GO:0030970 & GO:0030433			PF07915 (PFAM);G3DSA:2.70.130.10 (GENE3D);PTHR15414 (PANTHER);SIGNAL_PEPTIDE (PHOBIUS);SIGNAL_PEPTIDE_N_REGION (PHOBIUS);SIGNAL_PEPTIDE_H_REGION (PHOBIUS);NON_CYTOPLASMIC_DOMAIN (PHOBIUS);SIGNAL_PEPTIDE_C_REGION (PHOBIUS);SignalP-TM (SIGNALP_GRAM_POSITIVE);SignalP-noTM (SIGNALP_EUK);SignalP-noTM (SIGNALP_GRAM_NEGATIVE);SSF50911 (SUPERFAMILY)				MS-DArT_site_14207	0
Eucgr.C00495	Chr03	7440286	7441976	-	2.4.1.46 - Monogalactosyldiacylglycerol synthase / Uridine diphosphogalactose-1,2-diacylglycerol galactosyltransferase (1 of 4) & monogalactosyldiacylglycerol synthase chloroplastic	GO:0016758, GO:0009247 & GO:0016758 & GO:0009247	2.4.1.46	Monogalactosyldiacylglycerol synthase.	G3DSA:3.40.50.2000 (GENE3D);PF06925 (PFAM);PF04101 (PFAM);PTHR21015:SF25 (PANTHER);PTHR21015 (PANTHER);SSF53756 (SUPERFAMILY)	GO:0009247/GO:0016758;GO:0016758	glycolipid biosynthetic process/transferase activity, transferring hexosyl groups;transferase activity, transferring hexosyl groups	Biological Process/Molecular Function;Molecular Function	MS-DArT_site_14217,MS-DArT_site_14218,MS-DArT_site_14216	0,0,0
Eucgr.C00536	Chr03	8448474	8451981	+	3.1.1.1 - Carboxylesterase / Procaine esterase (1 of 91), & senescence-associated carboxylesterase 101 isoform X1		3.1.1.1	Carboxylesterase.					MS-DArT_site_14285	0
Eucgr.C00563	Chr03	9014973	9019056	+	PTHR27000:SF155 - LEUCINE-RICH REPEAT RECEPTOR-LIKE PROTEIN KINASE-RELATED (1 of 25) & receptor kinase 5	GO:0005515, GO:0006468, GO:0005524, GO:0004672 & GO:0005524 & GO:0016021 & GO:0004674 & GO:0006468	2.7.11.1 & 2.7.11	Non-specific serine/threonine protein kinase. & Transferring phosphorus-containing groups	PR00019 (PRINTS);SM00369 (SMART);G3DSA:3.80.10.10 (GENE3D);PF00560 (PFAM);PF13855 (PFAM);G3DSA:3.80.10.10 (GENE3D);PF00069 (PFAM);PF08263 (PFAM);G3DSA:1.10.510.10 (GENE3D);G3DSA:3.80.10.10 (GENE3D);G3DSA:3.30.200.20 (GENE3D);PTHR27000:SF155 (PANTHER);PTHR27000 (PANTHER);PS00107 (PROSITE_PATTERNS);SIGNAL_PEPTIDE (PHOBIUS);SIGNAL_PEPTIDE_H_REGION (PHOBIUS);SIGNAL_PEPTIDE_N_REGION (PHOBIUS);CYTOPLAS…	GO:0005515;GO:0005515;GO:0006468/GO:0004672/GO:0005524;GO:0005524;GO:0006468/GO:0004672/GO:0005524;GO:0005515	protein binding;protein binding;protein phosphorylation/protein kinase activity/ATP binding;ATP binding;protein phosphorylation/protein kinase activity/ATP binding;protein binding	Molecular Function;Molecular Function;Biological Process/Molecular Function/Molecular Function;Molecular Function;Biological Process/Molecular Function/Molecular Function;Molecular Function	MS-DArT_site_14315|MS-DArT_site_14316	0
Eucgr.C00564	Chr03	9064496	9068136	+	PTHR27000:SF155 - LEUCINE-RICH REPEAT RECEPTOR-LIKE PROTEIN KINASE-RELATED (1 of 25) & receptor kinase 5	GO:0005515, GO:0006468, GO:0005524, GO:0004672 & GO:0005524 & GO:0016021 & GO:0004674 & GO:0006468	2.7.11.1 & 2.7.11	Non-specific serine/threonine protein kinase. & Transferring phosphorus-containing groups	PR00019 (PRINTS);SM00369 (SMART);SM00220 (SMART);G3DSA:3.80.10.10 (GENE3D);PF00069 (PFAM);G3DSA:3.80.10.10 (GENE3D);G3DSA:1.10.510.10 (GENE3D);G3DSA:3.30.200.20 (GENE3D);PF13855 (PFAM);PTHR27000:SF155 (PANTHER);PTHR27000 (PANTHER);PS00107 (PROSITE_PATTERNS);PS00108 (PROSITE_PATTERNS);TRANSMEMBRANE (PHOBIUS);CYTOPLASMIC_DOMAIN (PHOBIUS);NON_CYTOPLASMIC_DOMAIN (PHOBIUS);PS51450 (PROSITE_PROFILES);P…	GO:0004672/GO:0005524/GO:0006468;GO:0004672/GO:0005524/GO:0006468;GO:0005515;GO:0005524;GO:0004672/GO:0006468;GO:0005515;GO:0004672/GO:0005524/GO:0006468	protein kinase activity/ATP binding/protein phosphorylation;protein kinase activity/ATP binding/protein phosphorylation;protein binding;ATP binding;protein kinase activity/protein phosphorylation;protein binding;protein kinase activity/ATP binding/protein phosphorylation	Molecular Function/Molecular Function/Biological Process;Molecular Function/Molecular Function/Biological Process;Molecular Function;Molecular Function;Molecular Function/Biological Process;Molecular Function;Molecular Function/Molecular Function/Biological Process	MS-DArT_site_14321|MS-DArT_site_14322	0
Eucgr.C00320	Chr03	10306147	10309714	+	K03715 - 1,2-diacylglycerol 3-beta-galactosyltransferase (E2.4.1.46) (1 of 3), & monogalactosyldiacylglycerol synthase chloroplastic-like	GO:0016758, GO:0009247 & GO:0016758 & GO:0009247	2.4.1.46	Monogalactosyldiacylglycerol synthase.	PF04101 (PFAM);G3DSA:3.40.50.2000 (GENE3D);PF06925 (PFAM);PTHR21015 (PANTHER);PTHR21015:SF25 (PANTHER);SSF53756 (SUPERFAMILY)	GO:0016758;GO:0016758/GO:0009247	transferase activity, transferring hexosyl groups;transferase activity, transferring hexosyl groups/glycolipid biosynthetic process	Molecular Function;Molecular Function/Biological Process	MS-DArT_site_14433,MS-DArT_site_14432	0,0
Eucgr.C00587	Chr03	11336627	11340571	+	PTHR31351:SF7 - PHOSPHOINOSITIDE BINDING PROTEIN (1 of 2) & VAN3-binding -like isoform X2	GO:0016021			SM00233 (SMART);PF08458 (PFAM);G3DSA:2.30.29.30 (GENE3D);PF05703 (PFAM);PTHR31351 (PANTHER);PTHR31351:SF7 (PANTHER);CYTOPLASMIC_DOMAIN (PHOBIUS);NON_CYTOPLASMIC_DOMAIN (PHOBIUS);TRANSMEMBRANE (PHOBIUS);PS51257 (PROSITE_PROFILES);SSF50729 (SUPERFAMILY)				MS-DArT_site_14506	0
Eucgr.C00591	Chr03	11401860	11406210	-	KOG2972 - Uncharacterized conserved protein (1 of 1) & probable transcriptional regulatory At2g25830	GO:0009507			G3DSA:3.30.1270.10 (GENE3D);G3DSA:3.30.70.980 (GENE3D);PF01709 (PFAM);G3DSA:1.10.10.200 (GENE3D);PTHR12532 (PANTHER);PTHR12532:SF0 (PANTHER);NON_CYTOPLASMIC_DOMAIN (PHOBIUS);SIGNAL_PEPTIDE_H_REGION (PHOBIUS);SIGNAL_PEPTIDE (PHOBIUS);SIGNAL_PEPTIDE_C_REGION (PHOBIUS);SIGNAL_PEPTIDE_N_REGION (PHOBIUS);MF_00693 (HAMAP);SSF75625 (SUPERFAMILY)				MS-DArT_site_14508	0
Eucgr.C00611	Chr03	11539248	11544735	-	K11793 - cereblon (CRBN) (1 of 1) & ATP-dependent protease La domain-containing family	GO:0006508, GO:0004176 & GO:0006508 & GO:0004176	, 3.4.21.53 & 3.6.1 & 3.6.1.3 & 3.6.1.15	, Endopeptidase La. & Acting on acid anhydrides & Adenosinetriphosphatase & Nucleoside-triphosphate phosphatase	SM00464 (SMART);PF03226 (PFAM);PF02190 (PFAM);PTHR14255 (PANTHER);PTHR14255:SF4 (PANTHER);SSF88697 (SUPERFAMILY)	GO:0006508/GO:0004176;GO:0006508/GO:0004176	proteolysis/ATP-dependent peptidase activity;proteolysis/ATP-dependent peptidase activity	Biological Process/Molecular Function;Biological Process/Molecular Function	MS-DArT_site_14528,MS-DArT_site_14529	0,0
Eucgr.C00619	Chr03	11582751	11594948	+	K17613 - calcineurin-binding protein cabin-1 (CABIN1) (1 of 1) & Tetratricopeptide repeat-like superfamily isoform 1	GO:0005634 & GO:0031491 & GO:0006336			Coil (COILS);G3DSA:1.25.40.10 (GENE3D);PTHR15502:SF7 (PANTHER);PTHR15502:SF7 (PANTHER);PTHR15502 (PANTHER);PTHR15502:SF7 (PANTHER);PTHR15502 (PANTHER);PTHR15502 (PANTHER);SIGNAL_PEPTIDE_H_REGION (PHOBIUS);NON_CYTOPLASMIC_DOMAIN (PHOBIUS);SIGNAL_PEPTIDE_N_REGION (PHOBIUS);SIGNAL_PEPTIDE (PHOBIUS);SIGNAL_PEPTIDE_C_REGION (PHOBIUS);PS50293 (PROSITE_PROFILES);SSF48452 (SUPERFAMILY)	GO:0005515;GO:0006336;GO:0006336;GO:0006336;GO:0005515;GO:0005515	protein binding;DNA replication-independent nucleosome assembly;DNA replication-independent nucleosome assembly;DNA replication-independent nucleosome assembly;protein binding;protein binding	Molecular Function;Biological Process;Biological Process;Biological Process;Molecular Function;Molecular Function	MS-DArT_site_14536|MS-DArT_site_14537,MS-DArT_site_14535	0,0
Eucgr.C00620	Chr03	11596663	11601168	+	PTHR30603:SF13 - RNA POLYMERASE SIGMA FACTOR SIGC (1 of 1) & RNA polymerase sigma factor sigC	GO:0016987, GO:0006355, GO:0006352, GO:0003700, GO:0003677 & GO:0003677 & GO:0016987 & GO:0003700 & GO:0006355 & GO:0006352			Coil (COILS);PR00046 (PRINTS);TIGR02937 (TIGRFAM);PF04545 (PFAM);G3DSA:1.10.10.10 (GENE3D);PF04542 (PFAM);PF04539 (PFAM);G3DSA:1.10.601.10 (GENE3D);G3DSA:1.10.10.10 (GENE3D);PTHR30603:SF13 (PANTHER);PTHR30603 (PANTHER);PS00716 (PROSITE_PATTERNS);NON_CYTOPLASMIC_DOMAIN (PHOBIUS);SIGNAL_PEPTIDE_C_REGION (PHOBIUS);SIGNAL_PEPTIDE (PHOBIUS);SIGNAL_PEPTIDE_H_REGION (PHOBIUS);SIGNAL_PEPTIDE_N_REGION (PH…	GO:0006352/GO:0003700/GO:0006355/GO:0016987/GO:0003677;GO:0003677/GO:0006352/GO:0016987/GO:0003700/GO:0006355;GO:0006355/GO:0006352/GO:0003700/GO:0003677/GO:0016987;GO:0003700/GO:0016987/GO:0006355/GO:0006352/GO:0003677;GO:0003677/GO:0006352/GO:0003700/GO:0006355/GO:0016987;GO:0006352/GO:0003700/GO:0006355/GO:0016987/GO:0003677;GO:0003677/GO:0016987/GO:0006355/GO:0006352/GO:0003700;GO:0016987/GO:…	DNA-templated transcription, initiation/transcription factor activity, sequence-specific DNA binding/regulation of transcription, DNA-templated/sigma factor activity/DNA binding;DNA binding/DNA-templated transcription, initiation/sigma factor activity/transcription factor activity, sequence-specific DNA binding/regulation of transcription, DNA-templated;regulation of transcription, DNA-templated/…	Biological Process/Molecular Function/Biological Process/Molecular Function/Molecular Function;Molecular Function/Biological Process/Molecular Function/Molecular Function/Biological Process;Biological Process/Biological Process/Molecular Function/Molecular Function/Molecular Function;Molecular Function/Molecular Function/Biological Process/Biological Process/Molecular Function;Molecular Function/…	MS-DArT_site_14540	0
Eucgr.C00621	Chr03	11604462	11618803	+	PTHR31513:SF1 - GLYCINE-RICH PROTEIN (1 of 2), & hypothetical protein EUGRSUZ_C00621	GO:0016021			SM01411 (SMART);PTHR31513 (PANTHER);PTHR31513:SF1 (PANTHER);CYTOPLASMIC_DOMAIN (PHOBIUS);SIGNAL_PEPTIDE_H_REGION (PHOBIUS);NON_CYTOPLASMIC_DOMAIN (PHOBIUS);SIGNAL_PEPTIDE (PHOBIUS);TRANSMEMBRANE (PHOBIUS);SIGNAL_PEPTIDE_C_REGION (PHOBIUS);SIGNAL_PEPTIDE_N_REGION (PHOBIUS);SignalP-TM (SIGNALP_GRAM_POSITIVE);TMhelix (TMHMM);TMhelix (TMHMM)				MS-DArT_site_14548,MS-DArT_site_14547,MS-DArT_site_14546	0,0,0
Eucgr.C00625	Chr03	11638392	11646494	-	K13210 - far upstream element-binding protein (FUBP) (1 of 3) & far upstream element-binding 2-like	GO:0003723			SM00322 (SMART);G3DSA:3.30.1370.10 (GENE3D);G3DSA:3.30.1370.10 (GENE3D);PF00013 (PFAM);PTHR10288 (PANTHER);PTHR10288:SF145 (PANTHER);PS50084 (PROSITE_PROFILES);SSF54791 (SUPERFAMILY);SSF54791 (SUPERFAMILY)	GO:0003676;GO:0003723;GO:0003723;GO:0003723;GO:0003723;GO:0003723;GO:0003723	nucleic acid binding;RNA binding;RNA binding;RNA binding;RNA binding;RNA binding;RNA binding	Molecular Function;Molecular Function;Molecular Function;Molecular Function;Molecular Function;Molecular Function;Molecular Function	MS-DArT_site_14554,MS-DArT_site_14553	0,0
Eucgr.C00627	Chr03	11647936	11654187	+	PTHR12276:SF7 - CLATHRIN INTERACTOR EPSIN 1 (1 of 1), & clathrin interactor EPSIN 1	GO:0005794 & GO:0002020 & GO:0030276 & GO:0005884 & GO:0006623 & GO:0009579			Coil (COILS);SM00273 (SMART);G3DSA:1.25.40.90 (GENE3D);PF01417 (PFAM);PTHR12276 (PANTHER);PTHR12276:SF7 (PANTHER);PS50942 (PROSITE_PROFILES);SSF48464 (SUPERFAMILY)	GO:0006623/GO:0030276	protein targeting to vacuole/clathrin binding	Biological Process/Molecular Function	MS-DArT_site_14555	0
Eucgr.C00628	Chr03	11654516	11660167	-	K18740 - exonuclease 3'-5' domain-containing protein 1 (EXD1, EGL) (1 of 1), & exosome component 10 isoform X2	GO:0003723, GO:0008408, GO:0006139, GO:0003676 & GO:0008408 & GO:0090305 & GO:0003723	3.1.13.5, & 3.1	Ribonuclease D., & Acting on ester bonds	SM00322 (SMART);SM00474 (SMART);G3DSA:3.30.420.10 (GENE3D);PF00013 (PFAM);G3DSA:3.30.1370.10 (GENE3D);PF01612 (PFAM);PTHR12124:SF45 (PANTHER);PTHR12124 (PANTHER);PS50084 (PROSITE_PROFILES);SSF54791 (SUPERFAMILY);SSF53098 (SUPERFAMILY)	GO:0003676;GO:0003676/GO:0008408/GO:0006139;GO:0003676;GO:0003723;GO:0003723;GO:0003676/GO:0008408/GO:0006139;GO:0003723;GO:0003723;GO:0003676	nucleic acid binding;nucleic acid binding/3'-5' exonuclease activity/nucleobase-containing compound metabolic process;nucleic acid binding;RNA binding;RNA binding;nucleic acid binding/3'-5' exonuclease activity/nucleobase-containing compound metabolic process;RNA binding;RNA binding;nucleic acid binding	Molecular Function;Molecular Function/Molecular Function/Biological Process;Molecular Function;Molecular Function;Molecular Function;Molecular Function/Molecular Function/Biological Process;Molecular Function;Molecular Function;Molecular Function	MS-DArT_site_14556	0
Eucgr.C00633	Chr03	11749816	11761814	-	PTHR10516:SF268 - PEPTIDYL-PROLYL CIS-TRANS ISOMERASE PASTICCINO1 (1 of 1) & peptidyl-prolyl cis-trans isomerase PASTICCINO1	GO:0005515, GO:0006457, GO:0048513, GO:0042761, GO:0030154 & GO:0009793 & GO:0009880 & GO:0061077 & GO:0042761 & GO:0048513 & GO:0000413 & GO:0009735 & GO:0048527 & GO:0005789 & GO:0003755 & GO:0009826 & GO:0005528 & GO:0030154 & GO:0005829 & GO:0030010	5.2.1.8	Peptidylprolyl isomerase. & Peptidylprolyl isomerase	Coil (COILS);SM00028 (SMART);G3DSA:1.25.40.10 (GENE3D);PF07719 (PFAM);PF13181 (PFAM);G3DSA:3.10.50.40 (GENE3D);G3DSA:3.10.50.40 (GENE3D);G3DSA:3.10.50.40 (GENE3D);PF00254 (PFAM);PTHR10516 (PANTHER);PTHR10516:SF268 (PANTHER);PS50059 (PROSITE_PROFILES);PS50059 (PROSITE_PROFILES);PS50005 (PROSITE_PROFILES);PS50059 (PROSITE_PROFILES);PS50293 (PROSITE_PROFILES);PS50005 (PROSITE_PROFILES);PS50005 (PROS…	GO:0005515;GO:0005515;GO:0005515;GO:0006457;GO:0048513/GO:0042761/GO:0030154;GO:0006457;GO:0006457;GO:0005515;GO:0006457;GO:0005515;GO:0005515;GO:0005515;GO:0005515	protein binding;protein binding;protein binding;protein folding;animal organ development/very long-chain fatty acid biosynthetic process/cell differentiation;protein folding;protein folding;protein binding;protein folding;protein binding;protein binding;protein binding;protein binding	Molecular Function;Molecular Function;Molecular Function;Biological Process;Biological Process/Biological Process/Biological Process;Biological Process;Biological Process;Molecular Function;Biological Process;Molecular Function;Molecular Function;Molecular Function;Molecular Function	MS-DArT_site_14578	0
Eucgr.C00638	Chr03	11786597	11790455	-	K03940 - NADH dehydrogenase (ubiquinone) Fe-S protein 7 (NDUFS7) (1 of 1) & NADH dehydrogenase [ubiquinone] iron-sulfur mitochondrial	GO:0055114, GO:0051536 & GO:0048038 & GO:0046872 & GO:0005739 & GO:0008137 & GO:0055114 & GO:0051539 & GO:0070469	1.6.99.3, 1.6.5.3 & 1.6.99.5 & 1.6.99.3 & 1.6.5.3	NADH dehydrogenase., NADH:ubiquinone reductase (H(+)-translocating). & Acting on NADH or NADPH & NADH dehydrogenase & NADH:ubiquinone reductase (H(+)-translocating)	TIGR01957 (TIGRFAM);G3DSA:3.40.50.700 (GENE3D);PF01058 (PFAM);PTHR11995:SF19 (PANTHER);PTHR11995 (PANTHER);PS01150 (PROSITE_PATTERNS);SIGNAL_PEPTIDE (PHOBIUS);SIGNAL_PEPTIDE_C_REGION (PHOBIUS);SIGNAL_PEPTIDE_H_REGION (PHOBIUS);SIGNAL_PEPTIDE_N_REGION (PHOBIUS);NON_CYTOPLASMIC_DOMAIN (PHOBIUS);SignalP-TM (SIGNALP_GRAM_POSITIVE);SSF56770 (SUPERFAMILY)	GO:0048038/GO:0051539/GO:0008137/GO:0055114;GO:0055114/GO:0051536;GO:0055114/GO:0051536;GO:0048038/GO:0051539/GO:0008137/GO:0055114	quinone binding/4 iron, 4 sulfur cluster binding/NADH dehydrogenase (ubiquinone) activity/oxidation-reduction process;oxidation-reduction process/iron-sulfur cluster binding;oxidation-reduction process/iron-sulfur cluster binding;quinone binding/4 iron, 4 sulfur cluster binding/NADH dehydrogenase (ubiquinone) activity/oxidation-reduction process	Molecular Function/Molecular Function/Molecular Function/Biological Process;Biological Process/Molecular Function;Biological Process/Molecular Function;Molecular Function/Molecular Function/Molecular Function/Biological Process	MS-DArT_site_14587	0
[truncated: 1,928 more rows]

## Sheet: Juvenile leaves
Gene name	Chromosome	Gene start	Gene end	Gene strand	Gene description	Annotation GO ID	Enzyme code	Enzyme description	Interpro signatures	Interpro GO ID	Interpro GO term	Interpro GO category	MSD-Methylated sites (When more than one, separated by comma)	Distance to genes in bp (When more than one, separated by comma)
[truncated: 2,509 more rows]

## Sheet: Xylem
Gene name	Chromosome	Gene start	Gene end	Gene strand	Gene description	Annotation GO ID	Enzyme code	Enzyme description	Interpro signatures	Interpro GO ID	Interpro GO term	Interpro GO category	MSD-Methylated sites (When more than one, separated by comma)	Distance to genes in bp (When more than one, separated by comma)
[truncated: 2,416 more rows]
