# Supplementary material for: A cost-effective approach to DNA methylation detection by Methyl Sensitive DArT sequencing
Source: PLoS One. 2020 Jun 4;15(6):e0233800. doi: 10.1371/journal.pone.0233800 (PMC7272069; doi:10.1371/journal.pone.0233800)
Supplement: S3 File — (XLSX) [file pone.0233800.s013.xlsx]

## Sheet: Adult leaves
Enriched GO terms considering the set of all methylated genes in adult leaves.
ID	Description	Ontology	GeneRatio	BgRatio	pvalue	qvalue	geneID	Count
GO:0051641	cellular localization	BP	98/1511	322/9326	6.77E-11	5.85E-08	Eucgr.A00001/Eucgr.A00035/Eucgr.A00473/Eucgr.A00509/Eucgr.A00543/Eucgr.A00600/Eucgr.A00607/Eucgr.A00647/Eucgr.A01050/Eucgr.A02017/Eucgr.A02575/Eucgr.A02966/Eucgr.A02967/Eucgr.A02971/Eucgr.B00317/Eucgr.B00583/Eucgr.B02209/Eucgr.B02594/Eucgr.B03196/Eucgr.B03952/Eucgr.C00132/Eucgr.C00480/Eucgr.C00627/Eucgr.C01579/Eucgr.C02867/Eucgr.C04138/Eucgr.D00483/Eucgr.D00655/Eucgr.D01026/Eucgr.D01986/Eucgr.D02…	98
GO:0008104	protein localization	BP	90/1511	294/9326	2.99E-10	8.60E-08	Eucgr.A00001/Eucgr.A00035/Eucgr.A00473/Eucgr.A00509/Eucgr.A00543/Eucgr.A00600/Eucgr.A00607/Eucgr.A00647/Eucgr.A01050/Eucgr.A02017/Eucgr.A02575/Eucgr.A02966/Eucgr.A02967/Eucgr.A02971/Eucgr.B00317/Eucgr.B00583/Eucgr.B02209/Eucgr.B02594/Eucgr.B03952/Eucgr.C00132/Eucgr.C00480/Eucgr.C00627/Eucgr.C00951/Eucgr.C01046/Eucgr.C01579/Eucgr.C02867/Eucgr.C03673/Eucgr.C03936/Eucgr.C04138/Eucgr.D00483/Eucgr.D00…	90
GO:0046907	intracellular transport	BP	80/1511	254/9326	6.71E-10	1.45E-07	Eucgr.A00001/Eucgr.A00035/Eucgr.A00509/Eucgr.A00543/Eucgr.A00600/Eucgr.A00607/Eucgr.A00647/Eucgr.A01050/Eucgr.A02017/Eucgr.A02575/Eucgr.A02966/Eucgr.A02971/Eucgr.B00317/Eucgr.B00583/Eucgr.B02209/Eucgr.B02594/Eucgr.B03196/Eucgr.B03952/Eucgr.C00132/Eucgr.C00480/Eucgr.C00627/Eucgr.C01579/Eucgr.C02867/Eucgr.C04138/Eucgr.D00483/Eucgr.D00655/Eucgr.D01026/Eucgr.D02141/Eucgr.D02427/Eucgr.D02446/Eucgr.D02…	80
GO:0006259	DNA metabolic process	BP	76/1511	256/9326	3.23E-08	3.49E-06	Eucgr.A01177/Eucgr.A01547/Eucgr.A01754/Eucgr.A02236/Eucgr.A02303/Eucgr.A02992/Eucgr.B00242/Eucgr.B00672/Eucgr.B00704/Eucgr.B01452/Eucgr.B01945/Eucgr.B02615/Eucgr.B03561/Eucgr.B03662/Eucgr.B03882/Eucgr.C01723/Eucgr.C02886/Eucgr.C03174/Eucgr.C03861/Eucgr.D00002/Eucgr.D00296/Eucgr.D00483/Eucgr.D00696/Eucgr.D00813/Eucgr.D01139/Eucgr.D01236/Eucgr.D01628/Eucgr.D02616/Eucgr.E00349/Eucgr.E00409/Eucgr.E00…	76
GO:0015833	peptide transport	BP	79/1511	275/9326	8.30E-08	6.52E-06	Eucgr.A00001/Eucgr.A00035/Eucgr.A00509/Eucgr.A00543/Eucgr.A00600/Eucgr.A00607/Eucgr.A00647/Eucgr.A01050/Eucgr.A02017/Eucgr.A02966/Eucgr.A02967/Eucgr.A02971/Eucgr.B00317/Eucgr.B00583/Eucgr.B02209/Eucgr.B02594/Eucgr.B02629/Eucgr.B03952/Eucgr.C00132/Eucgr.C00480/Eucgr.C00627/Eucgr.C00951/Eucgr.C01046/Eucgr.C01579/Eucgr.C02867/Eucgr.C03673/Eucgr.C03936/Eucgr.C04138/Eucgr.D00483/Eucgr.D00655/Eucgr.D02…	79
GO:0051128	regulation of cellular component organization	BP	34/1511	88/9326	3.16E-07	1.95E-05	Eucgr.A00035/Eucgr.A01050/Eucgr.A02017/Eucgr.B00609/Eucgr.B03561/Eucgr.C00100/Eucgr.C00824/Eucgr.C03194/Eucgr.C03799/Eucgr.C04376/Eucgr.D00427/Eucgr.D01840/Eucgr.E01037/Eucgr.E04332/Eucgr.F01177/Eucgr.F01600/Eucgr.F03069/Eucgr.F04480/Eucgr.G02360/Eucgr.H00823/Eucgr.H02768/Eucgr.H02816/Eucgr.H03031/Eucgr.H04037/Eucgr.I01462/Eucgr.I01475/Eucgr.I02503/Eucgr.J02123/Eucgr.J02844/Eucgr.K00914/Eucgr.K01…	34
GO:1901137	carbohydrate derivative biosynthetic process	BP	55/1511	176/9326	4.26E-07	2.45E-05	Eucgr.A00534/Eucgr.A00642/Eucgr.A00868/Eucgr.A01374/Eucgr.A01538/Eucgr.A02290/Eucgr.B00660/Eucgr.B03480/Eucgr.C00320/Eucgr.C00495/Eucgr.D00343/Eucgr.D01220/Eucgr.D01657/Eucgr.E00189/Eucgr.E00871/Eucgr.E02668/Eucgr.E03445/Eucgr.F01561/Eucgr.F01594/Eucgr.F01647/Eucgr.F01823/Eucgr.F02506/Eucgr.F03473/Eucgr.F03667/Eucgr.F03982/Eucgr.F04117/Eucgr.G01905/Eucgr.G02224/Eucgr.G02723/Eucgr.G02933/Eucgr.G03…	55
GO:0051276	chromosome organization	BP	52/1511	164/9326	5.31E-07	2.86E-05	Eucgr.A01107/Eucgr.A01754/Eucgr.A02133/Eucgr.A02236/Eucgr.A02895/Eucgr.B00704/Eucgr.B01452/Eucgr.B01457/Eucgr.B01550/Eucgr.B01556/Eucgr.B03381/Eucgr.B03561/Eucgr.B03662/Eucgr.C00619/Eucgr.C00824/Eucgr.C03174/Eucgr.C03688/Eucgr.D00002/Eucgr.D01628/Eucgr.D02305/Eucgr.E00362/Eucgr.E00409/Eucgr.E00638/Eucgr.E02391/Eucgr.F01177/Eucgr.F03008/Eucgr.F03013/Eucgr.F03572/Eucgr.F03851/Eucgr.F04062/Eucgr.F04…	52
GO:0009605	response to external stimulus	BP	51/1511	165/9326	1.61E-06	7.71E-05	Eucgr.A00257/Eucgr.A00285/Eucgr.A00908/Eucgr.A02303/Eucgr.A02946/Eucgr.B00238/Eucgr.B00544/Eucgr.B00853/Eucgr.B01356/Eucgr.B01476/Eucgr.B02209/Eucgr.B02478/Eucgr.B02495/Eucgr.B03196/Eucgr.B03506/Eucgr.C00406/Eucgr.C04019/Eucgr.C04138/Eucgr.D00642/Eucgr.D01061/Eucgr.E01026/Eucgr.E01504/Eucgr.E03208/Eucgr.F02954/Eucgr.F03423/Eucgr.F04303/Eucgr.F04428/Eucgr.G00990/Eucgr.G01124/Eucgr.G01779/Eucgr.H01…	51
GO:1901135	carbohydrate derivative metabolic process	BP	79/1511	295/9326	1.88E-06	8.29E-05	Eucgr.A00534/Eucgr.A00642/Eucgr.A00868/Eucgr.A01374/Eucgr.A01538/Eucgr.A02290/Eucgr.A02946/Eucgr.B00341/Eucgr.B00660/Eucgr.B02421/Eucgr.B02495/Eucgr.B03480/Eucgr.B03528/Eucgr.C00320/Eucgr.C00495/Eucgr.C00793/Eucgr.D00343/Eucgr.D01220/Eucgr.D01657/Eucgr.E00189/Eucgr.E00871/Eucgr.E02668/Eucgr.E03445/Eucgr.F01561/Eucgr.F01594/Eucgr.F01647/Eucgr.F01823/Eucgr.F02367/Eucgr.F02506/Eucgr.F02980/Eucgr.F03…	79
GO:0016192	vesicle-mediated transport	BP	63/1511	220/9326	1.92E-06	8.29E-05	Eucgr.A00035/Eucgr.A00473/Eucgr.A00509/Eucgr.A01050/Eucgr.A01905/Eucgr.A02017/Eucgr.A02575/Eucgr.B00707/Eucgr.B02594/Eucgr.B03196/Eucgr.B03390/Eucgr.B03952/Eucgr.B04005/Eucgr.C00100/Eucgr.C01004/Eucgr.C01579/Eucgr.C02306/Eucgr.C02758/Eucgr.C02867/Eucgr.C03799/Eucgr.C04138/Eucgr.D00483/Eucgr.D01026/Eucgr.D01986/Eucgr.D02141/Eucgr.D02473/Eucgr.D02557/Eucgr.D02650/Eucgr.E00053/Eucgr.E00370/Eucgr.E01…	63
GO:0048519	negative regulation of biological process	BP	58/1511	198/9326	2.22E-06	9.14E-05	Eucgr.A02017/Eucgr.A02083/Eucgr.A02925/Eucgr.B00033/Eucgr.B01356/Eucgr.B02503/Eucgr.B02582/Eucgr.B03381/Eucgr.B03506/Eucgr.B03561/Eucgr.B03714/Eucgr.B03826/Eucgr.C00406/Eucgr.C00739/Eucgr.C00824/Eucgr.C01809/Eucgr.C03168/Eucgr.C03688/Eucgr.C04019/Eucgr.D00483/Eucgr.D02653/Eucgr.E02414/Eucgr.E02475/Eucgr.E03350/Eucgr.F01177/Eucgr.F02571/Eucgr.F02825/Eucgr.F03751/Eucgr.F03766/Eucgr.F04480/Eucgr.G00…	58
GO:0035556	intracellular signal transduction	BP	70/1511	255/9326	2.82E-06	1.11E-04	Eucgr.A00779/Eucgr.A00803/Eucgr.A01405/Eucgr.A01527/Eucgr.A02545/Eucgr.B00215/Eucgr.B00222/Eucgr.B00380/Eucgr.B00544/Eucgr.B00575/Eucgr.B00871/Eucgr.B01052/Eucgr.B01157/Eucgr.B01356/Eucgr.B01990/Eucgr.B02547/Eucgr.B03196/Eucgr.B03506/Eucgr.C00012/Eucgr.C00380/Eucgr.C00756/Eucgr.C01141/Eucgr.C04019/Eucgr.D00474/Eucgr.D00642/Eucgr.D01430/Eucgr.E00022/Eucgr.E00308/Eucgr.E00370/Eucgr.E00386/Eucgr.F00…	70
GO:0033554	cellular response to stress	BP	69/1511	253/9326	4.25E-06	1.60E-04	Eucgr.A00257/Eucgr.A00285/Eucgr.A01177/Eucgr.A01547/Eucgr.A01754/Eucgr.A02303/Eucgr.B00242/Eucgr.B00341/Eucgr.B00704/Eucgr.B01452/Eucgr.B01760/Eucgr.B01945/Eucgr.B03506/Eucgr.B03882/Eucgr.C00480/Eucgr.C00901/Eucgr.C01723/Eucgr.C03174/Eucgr.C03861/Eucgr.C04019/Eucgr.D00296/Eucgr.D00414/Eucgr.D00813/Eucgr.E00349/Eucgr.E00351/Eucgr.E00409/Eucgr.E00638/Eucgr.E01504/Eucgr.E02414/Eucgr.F00332/Eucgr.F01…	69
GO:0048523	negative regulation of cellular process	BP	37/1511	110/9326	4.96E-06	1.79E-04	Eucgr.A02083/Eucgr.B01356/Eucgr.B02503/Eucgr.B03381/Eucgr.B03561/Eucgr.C00739/Eucgr.C01809/Eucgr.C03168/Eucgr.C03688/Eucgr.C04019/Eucgr.D00483/Eucgr.E02475/Eucgr.E03350/Eucgr.F01177/Eucgr.F02571/Eucgr.F02825/Eucgr.F03751/Eucgr.F04480/Eucgr.G00556/Eucgr.G02360/Eucgr.G03219/Eucgr.H00823/Eucgr.H02748/Eucgr.H04042/Eucgr.H04558/Eucgr.I00013/Eucgr.I00536/Eucgr.I02503/Eucgr.J01260/Eucgr.J02086/Eucgr.K00…	37
GO:0048193	Golgi vesicle transport	BP	29/1511	79/9326	7.61E-06	2.53E-04	Eucgr.A00473/Eucgr.A02575/Eucgr.B00707/Eucgr.B02594/Eucgr.B03390/Eucgr.C01004/Eucgr.C02306/Eucgr.C02867/Eucgr.D00483/Eucgr.D01026/Eucgr.D02141/Eucgr.D02473/Eucgr.D02557/Eucgr.E00370/Eucgr.E02021/Eucgr.F03341/Eucgr.F04242/Eucgr.G00871/Eucgr.G01708/Eucgr.G01711/Eucgr.G02381/Eucgr.G02726/Eucgr.H03169/Eucgr.H03367/Eucgr.I01787/Eucgr.J02845/Eucgr.J03008/Eucgr.K00564/Eucgr.K01948	29
GO:0007049	cell cycle	BP	43/1511	139/9326	1.01E-05	3.25E-04	Eucgr.A01107/Eucgr.A01177/Eucgr.A02895/Eucgr.B01452/Eucgr.B03196/Eucgr.B03662/Eucgr.C00739/Eucgr.C01007/Eucgr.C02726/Eucgr.C02886/Eucgr.D00483/Eucgr.D00655/Eucgr.E00053/Eucgr.E00349/Eucgr.E00409/Eucgr.E02475/Eucgr.F00650/Eucgr.F01076/Eucgr.F03311/Eucgr.F03341/Eucgr.F03505/Eucgr.F03751/Eucgr.F04480/Eucgr.H00025/Eucgr.H02748/Eucgr.H02905/Eucgr.H03550/Eucgr.H04558/Eucgr.I00013/Eucgr.I00435/Eucgr.I01…	43
GO:0009791	post-embryonic development	BP	69/1511	260/9326	1.17E-05	3.37E-04	Eucgr.A00534/Eucgr.A01411/Eucgr.A01617/Eucgr.A02139/Eucgr.A02925/Eucgr.B00238/Eucgr.B00394/Eucgr.B00544/Eucgr.B01356/Eucgr.B01476/Eucgr.B02532/Eucgr.B02582/Eucgr.B03196/Eucgr.B03436/Eucgr.B03506/Eucgr.B03714/Eucgr.C00066/Eucgr.C00633/Eucgr.C00739/Eucgr.C00824/Eucgr.C01007/Eucgr.C01428/Eucgr.C02886/Eucgr.C03980/Eucgr.C04030/Eucgr.C04138/Eucgr.D00642/Eucgr.D01061/Eucgr.D02427/Eucgr.E00053/Eucgr.E01…	69
GO:0033993	response to lipid	BP	40/1511	127/9326	1.27E-05	3.55E-04	Eucgr.A00141/Eucgr.A00257/Eucgr.A00534/Eucgr.A01617/Eucgr.A02545/Eucgr.B00015/Eucgr.B00033/Eucgr.B00544/Eucgr.B00660/Eucgr.B03506/Eucgr.B03662/Eucgr.B03714/Eucgr.B03812/Eucgr.C00739/Eucgr.C03168/Eucgr.C04019/Eucgr.D02473/Eucgr.E00022/Eucgr.E00047/Eucgr.E00221/Eucgr.E03350/Eucgr.F02337/Eucgr.F03336/Eucgr.G00556/Eucgr.G03076/Eucgr.G03219/Eucgr.H04632/Eucgr.H04699/Eucgr.I00017/Eucgr.I01070/Eucgr.J00…	40
GO:0009628	response to abiotic stimulus	BP	69/1511	262/9326	1.54E-05	4.04E-04	Eucgr.A00257/Eucgr.A00908/Eucgr.A02303/Eucgr.A02683/Eucgr.B00015/Eucgr.B00238/Eucgr.B00394/Eucgr.B00628/Eucgr.B01356/Eucgr.B01556/Eucgr.B02180/Eucgr.B02582/Eucgr.B02721/Eucgr.B03436/Eucgr.B03506/Eucgr.B03714/Eucgr.C00480/Eucgr.C00739/Eucgr.C02488/Eucgr.C02815/Eucgr.C02886/Eucgr.C03168/Eucgr.C03820/Eucgr.C04090/Eucgr.C04138/Eucgr.D00642/Eucgr.D01061/Eucgr.E02414/Eucgr.E03208/Eucgr.E03350/Eucgr.F02…	69
GO:0009737	response to abscisic acid	BP	35/1511	107/9326	1.77E-05	4.24E-04	Eucgr.A00141/Eucgr.A00257/Eucgr.A00534/Eucgr.A01617/Eucgr.A02545/Eucgr.B00015/Eucgr.B00033/Eucgr.B00544/Eucgr.B00660/Eucgr.B03506/Eucgr.B03714/Eucgr.C00739/Eucgr.C03168/Eucgr.C04019/Eucgr.D02473/Eucgr.E00022/Eucgr.E00047/Eucgr.E03350/Eucgr.F02337/Eucgr.F03336/Eucgr.G00556/Eucgr.G03076/Eucgr.G03219/Eucgr.H04632/Eucgr.H04699/Eucgr.I00017/Eucgr.I01070/Eucgr.J00923/Eucgr.J02086/Eucgr.J02432/Eucgr.J02…	35
GO:0046488	phosphatidylinositol metabolic process	BP	21/1511	51/9326	1.81E-05	4.24E-04	Eucgr.A01618/Eucgr.A02290/Eucgr.C03186/Eucgr.E01881/Eucgr.E03818/Eucgr.F02367/Eucgr.F02638/Eucgr.F02685/Eucgr.F03001/Eucgr.F03343/Eucgr.F03982/Eucgr.G00449/Eucgr.G00577/Eucgr.G01697/Eucgr.G02933/Eucgr.H02571/Eucgr.H02816/Eucgr.J02281/Eucgr.J02598/Eucgr.K02143/Eucgr.K03343	21
GO:0043087	regulation of GTPase activity	BP	19/1511	45/9326	2.97E-05	6.26E-04	Eucgr.A00035/Eucgr.A01700/Eucgr.A02912/Eucgr.B00701/Eucgr.B02225/Eucgr.B03196/Eucgr.B03736/Eucgr.C00756/Eucgr.C03168/Eucgr.E01037/Eucgr.F00743/Eucgr.F02135/Eucgr.G03244/Eucgr.H03367/Eucgr.H04699/Eucgr.I01475/Eucgr.I01543/Eucgr.K01884/Eucgr.K02348	19
GO:0019637	organophosphate metabolic process	BP	75/1511	297/9326	3.24E-05	6.66E-04	Eucgr.A00496/Eucgr.A00534/Eucgr.A00642/Eucgr.A00733/Eucgr.A00868/Eucgr.A01374/Eucgr.A01538/Eucgr.A01618/Eucgr.A02290/Eucgr.B00660/Eucgr.B02421/Eucgr.B02495/Eucgr.B03528/Eucgr.C00739/Eucgr.C03186/Eucgr.D01220/Eucgr.D01306/Eucgr.D01933/Eucgr.E00410/Eucgr.E00871/Eucgr.E01025/Eucgr.E01881/Eucgr.E02668/Eucgr.E03445/Eucgr.E03818/Eucgr.F00711/Eucgr.F01464/Eucgr.F01561/Eucgr.F01594/Eucgr.F01647/Eucgr.F01…	75
GO:0044093	positive regulation of molecular function	BP	30/1511	95/9326	1.42E-04	2.15E-03	Eucgr.A00035/Eucgr.A00803/Eucgr.A01700/Eucgr.B00033/Eucgr.B00222/Eucgr.B00701/Eucgr.B01052/Eucgr.B02225/Eucgr.B02547/Eucgr.B03196/Eucgr.B03736/Eucgr.B03826/Eucgr.C00739/Eucgr.C00756/Eucgr.C01141/Eucgr.E01037/Eucgr.F00743/Eucgr.F02016/Eucgr.F03415/Eucgr.G00037/Eucgr.G03244/Eucgr.H03367/Eucgr.H03550/Eucgr.H04206/Eucgr.H04382/Eucgr.H04699/Eucgr.I01475/Eucgr.I01543/Eucgr.K01221/Eucgr.K02348	30
GO:0048585	negative regulation of response to stimulus	BP	13/1511	28/9326	1.71E-04	2.54E-03	Eucgr.B02582/Eucgr.C00739/Eucgr.C03168/Eucgr.C04019/Eucgr.E02414/Eucgr.G00556/Eucgr.G02854/Eucgr.G03219/Eucgr.I00728/Eucgr.J02086/Eucgr.J02935/Eucgr.K00729/Eucgr.K02568	13
GO:0009719	response to endogenous stimulus	BP	72/1511	302/9326	3.13E-04	3.72E-03	Eucgr.A00141/Eucgr.A00257/Eucgr.A00534/Eucgr.A01617/Eucgr.A02545/Eucgr.B00015/Eucgr.B00033/Eucgr.B00238/Eucgr.B00544/Eucgr.B00660/Eucgr.B02421/Eucgr.B02495/Eucgr.B03506/Eucgr.B03662/Eucgr.B03714/Eucgr.B03812/Eucgr.C00633/Eucgr.C00739/Eucgr.C01007/Eucgr.C01809/Eucgr.C02178/Eucgr.C03168/Eucgr.C03293/Eucgr.C04019/Eucgr.C04235/Eucgr.D00642/Eucgr.D00716/Eucgr.D02319/Eucgr.D02473/Eucgr.E00022/Eucgr.E00…	72
GO:0043603	cellular amide metabolic process	BP	102/1511	458/9326	3.14E-04	3.72E-03	Eucgr.A00019/Eucgr.A00214/Eucgr.A00394/Eucgr.A00608/Eucgr.A00913/Eucgr.A00956/Eucgr.A01322/Eucgr.A02083/Eucgr.A02294/Eucgr.A02359/Eucgr.A02371/Eucgr.A02776/Eucgr.A02903/Eucgr.B00021/Eucgr.B00214/Eucgr.B01310/Eucgr.B01356/Eucgr.B01418/Eucgr.B01462/Eucgr.B01628/Eucgr.B01908/Eucgr.B02210/Eucgr.B02610/Eucgr.B03662/Eucgr.B03733/Eucgr.C00652/Eucgr.C00667/Eucgr.C00848/Eucgr.C01159/Eucgr.C02263/Eucgr.C02…	102
GO:0003006	developmental process involved in reproduction	BP	55/1511	219/9326	4.10E-04	4.72E-03	Eucgr.A00534/Eucgr.A01411/Eucgr.A02139/Eucgr.A02143/Eucgr.A02925/Eucgr.B00238/Eucgr.B00394/Eucgr.B00544/Eucgr.B02532/Eucgr.B03196/Eucgr.B03506/Eucgr.B03714/Eucgr.C00066/Eucgr.C00633/Eucgr.C00739/Eucgr.C00824/Eucgr.C01007/Eucgr.C03980/Eucgr.C04030/Eucgr.C04138/Eucgr.D00642/Eucgr.D01061/Eucgr.D02427/Eucgr.E00053/Eucgr.E01449/Eucgr.E02414/Eucgr.E03208/Eucgr.F02686/Eucgr.F03336/Eucgr.F03613/Eucgr.F03…	55
GO:0051188	cofactor biosynthetic process	BP	38/1511	139/9326	5.59E-04	5.82E-03	Eucgr.A00535/Eucgr.A00868/Eucgr.A01538/Eucgr.A02294/Eucgr.B02610/Eucgr.C01875/Eucgr.E01025/Eucgr.E02668/Eucgr.F00711/Eucgr.F01464/Eucgr.F01561/Eucgr.F01594/Eucgr.F01647/Eucgr.F01823/Eucgr.F02370/Eucgr.F02506/Eucgr.F03796/Eucgr.F03840/Eucgr.G01120/Eucgr.G01905/Eucgr.G02402/Eucgr.G02823/Eucgr.H00086/Eucgr.H01393/Eucgr.H02846/Eucgr.J00008/Eucgr.J00327/Eucgr.J00614/Eucgr.J00729/Eucgr.J01749/Eucgr.J01…	38
GO:0009101	glycoprotein biosynthetic process	BP	13/1511	31/9326	5.83E-04	5.99E-03	Eucgr.B03480/Eucgr.D01657/Eucgr.F03473/Eucgr.F04117/Eucgr.G02723/Eucgr.G02933/Eucgr.G03076/Eucgr.H01160/Eucgr.I01147/Eucgr.I02739/Eucgr.J02587/Eucgr.K00317/Eucgr.L00584	13
GO:0050793	regulation of developmental process	BP	33/1511	116/9326	5.90E-04	5.99E-03	Eucgr.A02017/Eucgr.A02925/Eucgr.B00609/Eucgr.B02582/Eucgr.B03506/Eucgr.C00824/Eucgr.C01428/Eucgr.C02886/Eucgr.C03799/Eucgr.D00642/Eucgr.D01061/Eucgr.D01840/Eucgr.D02427/Eucgr.E00139/Eucgr.E02414/Eucgr.E03208/Eucgr.F02686/Eucgr.F03069/Eucgr.F04205/Eucgr.G00556/Eucgr.G02854/Eucgr.H03031/Eucgr.H04037/Eucgr.H04314/Eucgr.H04418/Eucgr.H04632/Eucgr.H04789/Eucgr.I01475/Eucgr.I02503/Eucgr.J02086/Eucgr.J02…	33
GO:0070647	protein modification by small protein conjugation or removal	BP	47/1511	183/9326	6.21E-04	6.12E-03	Eucgr.A00261/Eucgr.A02560/Eucgr.A02915/Eucgr.B00369/Eucgr.B00398/Eucgr.B02466/Eucgr.B02478/Eucgr.B03056/Eucgr.B03561/Eucgr.B03800/Eucgr.C01428/Eucgr.C01723/Eucgr.C01814/Eucgr.C03980/Eucgr.E00216/Eucgr.E00258/Eucgr.E02414/Eucgr.E03515/Eucgr.F00711/Eucgr.F01066/Eucgr.F02042/Eucgr.F02160/Eucgr.F03261/Eucgr.F03540/Eucgr.G00074/Eucgr.G01986/Eucgr.G02663/Eucgr.G02967/Eucgr.G03219/Eucgr.H02615/Eucgr.H03…	47
GO:0055086	nucleobase-containing small molecule metabolic process	BP	57/1511	234/9326	7.34E-04	6.82E-03	Eucgr.A00534/Eucgr.A00642/Eucgr.A00733/Eucgr.A00868/Eucgr.A01374/Eucgr.A01538/Eucgr.B00660/Eucgr.B02421/Eucgr.B03528/Eucgr.C00793/Eucgr.D00343/Eucgr.D01220/Eucgr.E00871/Eucgr.E01025/Eucgr.E02668/Eucgr.E03116/Eucgr.E03319/Eucgr.E03445/Eucgr.F01561/Eucgr.F01594/Eucgr.F01647/Eucgr.F01823/Eucgr.F02506/Eucgr.F03307/Eucgr.F03667/Eucgr.F03840/Eucgr.G00660/Eucgr.G00868/Eucgr.G01748/Eucgr.G01788/Eucgr.G01…	57
GO:0006760	folic acid-containing compound metabolic process	BP	10/1511	21/9326	7.61E-04	7.00E-03	Eucgr.A00394/Eucgr.A02294/Eucgr.B02610/Eucgr.F01594/Eucgr.F02167/Eucgr.G02823/Eucgr.I00580/Eucgr.I02741/Eucgr.J02122/Eucgr.K03460	10
GO:0071396	cellular response to lipid	BP	24/1511	77/9326	7.87E-04	7.16E-03	Eucgr.A00141/Eucgr.A00257/Eucgr.A02545/Eucgr.B00544/Eucgr.B03506/Eucgr.B03812/Eucgr.C00739/Eucgr.C03168/Eucgr.C04019/Eucgr.E00022/Eucgr.E00221/Eucgr.E03350/Eucgr.F02337/Eucgr.F03336/Eucgr.G00556/Eucgr.G03219/Eucgr.H04632/Eucgr.J00923/Eucgr.J02432/Eucgr.J02935/Eucgr.K01420/Eucgr.K02568/Eucgr.K02914/Eucgr.L02550	24
GO:0071215	cellular response to abscisic acid stimulus	BP	20/1511	60/9326	8.25E-04	7.27E-03	Eucgr.A00141/Eucgr.A00257/Eucgr.A02545/Eucgr.B00544/Eucgr.B03506/Eucgr.C00739/Eucgr.C03168/Eucgr.C04019/Eucgr.E00022/Eucgr.E03350/Eucgr.F02337/Eucgr.F03336/Eucgr.G00556/Eucgr.G03219/Eucgr.H04632/Eucgr.J00923/Eucgr.J02432/Eucgr.J02935/Eucgr.K01420/Eucgr.K02914	20
GO:0046835	carbohydrate phosphorylation	BP	11/1511	25/9326	9.51E-04	8.14E-03	Eucgr.A02848/Eucgr.A02851/Eucgr.C02197/Eucgr.F00471/Eucgr.F01647/Eucgr.F01823/Eucgr.H00494/Eucgr.H04065/Eucgr.I01312/Eucgr.J01899/Eucgr.K00768	11
GO:0023014	signal transduction by protein phosphorylation	BP	23/1511	74/9326	1.05E-03	8.73E-03	Eucgr.A00803/Eucgr.A02762/Eucgr.B00222/Eucgr.B00871/Eucgr.B01052/Eucgr.B01157/Eucgr.B01356/Eucgr.B02547/Eucgr.B03506/Eucgr.C00012/Eucgr.C01141/Eucgr.C04019/Eucgr.F01598/Eucgr.F03415/Eucgr.G00037/Eucgr.H04382/Eucgr.H04632/Eucgr.J02086/Eucgr.K00060/Eucgr.K00729/Eucgr.K01221/Eucgr.K02264/Eucgr.K03574	23
GO:0006486	protein glycosylation	BP	12/1511	29/9326	1.09E-03	8.73E-03	Eucgr.B03480/Eucgr.D01657/Eucgr.F03473/Eucgr.F04117/Eucgr.G02933/Eucgr.G03076/Eucgr.H01160/Eucgr.I01147/Eucgr.I02739/Eucgr.J02587/Eucgr.K00317/Eucgr.L00584	12
GO:0043413	macromolecule glycosylation	BP	12/1511	29/9326	1.09E-03	8.73E-03	Eucgr.B03480/Eucgr.D01657/Eucgr.F03473/Eucgr.F04117/Eucgr.G02933/Eucgr.G03076/Eucgr.H01160/Eucgr.I01147/Eucgr.I02739/Eucgr.J02587/Eucgr.K00317/Eucgr.L00584	12
GO:0044087	regulation of cellular component biogenesis	BP	12/1511	29/9326	1.09E-03	8.73E-03	Eucgr.A01050/Eucgr.A02017/Eucgr.C03194/Eucgr.C04376/Eucgr.D00427/Eucgr.E04332/Eucgr.F01600/Eucgr.G02360/Eucgr.H02768/Eucgr.H02816/Eucgr.I02503/Eucgr.K00914	12
GO:0000902	cell morphogenesis	BP	21/1511	66/9326	1.22E-03	9.51E-03	Eucgr.B00609/Eucgr.B03196/Eucgr.B03662/Eucgr.C00633/Eucgr.C03799/Eucgr.C04398/Eucgr.D00052/Eucgr.D01840/Eucgr.E00053/Eucgr.F01498/Eucgr.F03001/Eucgr.F03069/Eucgr.H03031/Eucgr.H04037/Eucgr.I01475/Eucgr.I02068/Eucgr.J00539/Eucgr.J02838/Eucgr.J02844/Eucgr.K00800/Eucgr.K02348	21
GO:0006606	protein import into nucleus	BP	13/1511	34/9326	1.63E-03	1.16E-02	Eucgr.A00600/Eucgr.D02427/Eucgr.F04480/Eucgr.G01904/Eucgr.G02106/Eucgr.H03281/Eucgr.H04107/Eucgr.I02730/Eucgr.J01771/Eucgr.J02948/Eucgr.K01721/Eucgr.K02007/Eucgr.K03215	13
GO:0051321	meiotic cell cycle	BP	13/1511	34/9326	1.63E-03	1.16E-02	Eucgr.A01177/Eucgr.E00349/Eucgr.E00409/Eucgr.F01076/Eucgr.H00025/Eucgr.H02748/Eucgr.H02905/Eucgr.I00435/Eucgr.J00539/Eucgr.J00844/Eucgr.J01370/Eucgr.K00248/Eucgr.K01213	13
GO:0016049	cell growth	BP	22/1511	72/9326	1.71E-03	1.17E-02	Eucgr.A00190/Eucgr.B00609/Eucgr.B00628/Eucgr.B02478/Eucgr.B03196/Eucgr.C00633/Eucgr.C02815/Eucgr.C04398/Eucgr.D00052/Eucgr.D00310/Eucgr.D00483/Eucgr.F00625/Eucgr.F01498/Eucgr.F03001/Eucgr.H00823/Eucgr.I00378/Eucgr.I01475/Eucgr.I02068/Eucgr.I02503/Eucgr.J01392/Eucgr.J02293/Eucgr.K03590	22
GO:0023057	negative regulation of signaling	BP	8/1511	16/9326	1.76E-03	1.17E-02	Eucgr.C00739/Eucgr.C03168/Eucgr.C04019/Eucgr.G00556/Eucgr.G03219/Eucgr.J02086/Eucgr.K00729/Eucgr.K02568	8
GO:0023051	regulation of signaling	BP	33/1511	123/9326	1.77E-03	1.17E-02	Eucgr.A00803/Eucgr.A01454/Eucgr.B00222/Eucgr.B01052/Eucgr.B02547/Eucgr.B03056/Eucgr.B03196/Eucgr.C00739/Eucgr.C00756/Eucgr.C01141/Eucgr.C01809/Eucgr.C03168/Eucgr.C04019/Eucgr.D00642/Eucgr.F03336/Eucgr.F03415/Eucgr.G00037/Eucgr.G00556/Eucgr.G01779/Eucgr.G03219/Eucgr.H04382/Eucgr.H04635/Eucgr.I01543/Eucgr.J00522/Eucgr.J02086/Eucgr.J02935/Eucgr.K00729/Eucgr.K01221/Eucgr.K02348/Eucgr.K02568/Eucgr.K02…	33
GO:1905957	regulation of cellular response to alcohol	BP	7/1511	13/9326	2.01E-03	1.27E-02	Eucgr.C00739/Eucgr.C03168/Eucgr.C04019/Eucgr.F03336/Eucgr.G00556/Eucgr.G03219/Eucgr.J02935	7
GO:0022607	cellular component assembly	BP	63/1511	276/9326	2.29E-03	1.37E-02	Eucgr.A00190/Eucgr.A00286/Eucgr.A00993/Eucgr.A01050/Eucgr.A02017/Eucgr.A02139/Eucgr.A02303/Eucgr.A02344/Eucgr.A02575/Eucgr.B00173/Eucgr.B00628/Eucgr.B01428/Eucgr.C00241/Eucgr.C00619/Eucgr.C01715/Eucgr.C02153/Eucgr.C02726/Eucgr.C03194/Eucgr.C03953/Eucgr.C04084/Eucgr.C04131/Eucgr.C04376/Eucgr.D00427/Eucgr.D00655/Eucgr.D01820/Eucgr.D02319/Eucgr.E00053/Eucgr.E01504/Eucgr.E02397/Eucgr.E02475/Eucgr.E04…	63
GO:0009653	anatomical structure morphogenesis	BP	40/1511	159/9326	2.30E-03	1.37E-02	Eucgr.A01617/Eucgr.B00238/Eucgr.B00609/Eucgr.B02504/Eucgr.B03196/Eucgr.B03662/Eucgr.C00066/Eucgr.C00633/Eucgr.C01007/Eucgr.C01715/Eucgr.C02153/Eucgr.C02815/Eucgr.C02886/Eucgr.C03799/Eucgr.C04398/Eucgr.D00052/Eucgr.D01840/Eucgr.D02305/Eucgr.E00053/Eucgr.F00625/Eucgr.F01498/Eucgr.F03001/Eucgr.F03069/Eucgr.F03261/Eucgr.F03676/Eucgr.H03031/Eucgr.H04037/Eucgr.H04418/Eucgr.H04635/Eucgr.H04789/Eucgr.I01…	40
GO:2000241	regulation of reproductive process	BP	16/1511	48/9326	2.66E-03	1.53E-02	Eucgr.A02925/Eucgr.B03506/Eucgr.C00824/Eucgr.D00642/Eucgr.D01061/Eucgr.D02427/Eucgr.E03208/Eucgr.F02686/Eucgr.G02854/Eucgr.H04314/Eucgr.H04418/Eucgr.H04632/Eucgr.H04789/Eucgr.I01475/Eucgr.J00539/Eucgr.K01213	16
GO:0031327	negative regulation of cellular biosynthetic process	BP	15/1511	44/9326	2.80E-03	1.58E-02	Eucgr.A02083/Eucgr.B01356/Eucgr.B02503/Eucgr.B03381/Eucgr.B03561/Eucgr.C01809/Eucgr.C03688/Eucgr.D00483/Eucgr.E03350/Eucgr.F01177/Eucgr.F02571/Eucgr.G00556/Eucgr.G02360/Eucgr.I00536/Eucgr.K02861	15
GO:0140013	meiotic nuclear division	BP	11/1511	28/9326	2.87E-03	1.59E-02	Eucgr.A01177/Eucgr.E00349/Eucgr.E00409/Eucgr.H00025/Eucgr.H02748/Eucgr.H02905/Eucgr.I00435/Eucgr.J00844/Eucgr.J01370/Eucgr.K00248/Eucgr.K01213	11
GO:0048518	positive regulation of biological process	BP	47/1511	196/9326	2.88E-03	1.59E-02	Eucgr.A00261/Eucgr.A00285/Eucgr.A00803/Eucgr.A00908/Eucgr.B00222/Eucgr.B00853/Eucgr.B01052/Eucgr.B02547/Eucgr.C00100/Eucgr.C00241/Eucgr.C00739/Eucgr.C00824/Eucgr.C01141/Eucgr.C03168/Eucgr.C04090/Eucgr.C04376/Eucgr.D00052/Eucgr.D00642/Eucgr.D01061/Eucgr.D02427/Eucgr.E00258/Eucgr.E03208/Eucgr.E04332/Eucgr.F01177/Eucgr.F01600/Eucgr.F02686/Eucgr.F03415/Eucgr.G00037/Eucgr.G02360/Eucgr.H02768/Eucgr.H02…	47
GO:0040007	growth	BP	27/1511	98/9326	2.96E-03	1.62E-02	Eucgr.A00190/Eucgr.B00609/Eucgr.B00628/Eucgr.B02478/Eucgr.B03196/Eucgr.B03506/Eucgr.C00633/Eucgr.C02815/Eucgr.C04398/Eucgr.D00052/Eucgr.D00310/Eucgr.D00483/Eucgr.F00625/Eucgr.F01498/Eucgr.F03001/Eucgr.G03219/Eucgr.H00823/Eucgr.H04632/Eucgr.I00378/Eucgr.I01475/Eucgr.I02068/Eucgr.I02503/Eucgr.J00923/Eucgr.J01392/Eucgr.J02293/Eucgr.K01213/Eucgr.K03590	27
GO:0043254	regulation of protein complex assembly	BP	9/1511	21/9326	3.45E-03	1.81E-02	Eucgr.A01050/Eucgr.A02017/Eucgr.C04376/Eucgr.E04332/Eucgr.F01600/Eucgr.G02360/Eucgr.H02768/Eucgr.H02816/Eucgr.K00914	9
GO:0048522	positive regulation of cellular process	BP	39/1511	158/9326	3.71E-03	1.87E-02	Eucgr.A00261/Eucgr.A00803/Eucgr.A00908/Eucgr.B00222/Eucgr.B01052/Eucgr.B02547/Eucgr.C00100/Eucgr.C00241/Eucgr.C00739/Eucgr.C00824/Eucgr.C01141/Eucgr.C03168/Eucgr.C04090/Eucgr.C04376/Eucgr.D00052/Eucgr.E00258/Eucgr.E03208/Eucgr.E04332/Eucgr.F01177/Eucgr.F01600/Eucgr.F03415/Eucgr.G00037/Eucgr.G02360/Eucgr.H02768/Eucgr.H02816/Eucgr.H03550/Eucgr.H04206/Eucgr.H04382/Eucgr.H04623/Eucgr.H04783/Eucgr.I02…	39
GO:0010558	negative regulation of macromolecule biosynthetic process	BP	14/1511	41/9326	3.76E-03	1.88E-02	Eucgr.A02083/Eucgr.B01356/Eucgr.B02503/Eucgr.B03381/Eucgr.B03561/Eucgr.C01809/Eucgr.C03688/Eucgr.D00483/Eucgr.E03350/Eucgr.F01177/Eucgr.G00556/Eucgr.G02360/Eucgr.I00536/Eucgr.K02861	14
GO:0043414	macromolecule methylation	BP	21/1511	72/9326	4.01E-03	1.95E-02	Eucgr.A02133/Eucgr.B02615/Eucgr.C00824/Eucgr.C01077/Eucgr.D01689/Eucgr.D02075/Eucgr.D02616/Eucgr.E00362/Eucgr.F02912/Eucgr.F03851/Eucgr.H01928/Eucgr.H04746/Eucgr.I00532/Eucgr.I01063/Eucgr.J00005/Eucgr.J00342/Eucgr.J01408/Eucgr.J02331/Eucgr.J03135/Eucgr.K02777/Eucgr.K02994	21
GO:0006457	protein folding	BP	30/1511	115/9326	4.38E-03	2.04E-02	Eucgr.A00285/Eucgr.A02095/Eucgr.B01534/Eucgr.B02532/Eucgr.B02887/Eucgr.B03403/Eucgr.B03593/Eucgr.C00633/Eucgr.C00671/Eucgr.C00901/Eucgr.E00348/Eucgr.E02397/Eucgr.F00332/Eucgr.F00651/Eucgr.F03134/Eucgr.F03504/Eucgr.F04343/Eucgr.G01979/Eucgr.G02400/Eucgr.H03463/Eucgr.I00662/Eucgr.I00705/Eucgr.I01459/Eucgr.J00461/Eucgr.J00618/Eucgr.J03072/Eucgr.K01672/Eucgr.K03340/Eucgr.L02398/Eucgr.L02444	30
GO:0051239	regulation of multicellular organismal process	BP	23/1511	82/9326	4.58E-03	2.10E-02	Eucgr.A02017/Eucgr.A02925/Eucgr.B02582/Eucgr.B03506/Eucgr.C00824/Eucgr.C01428/Eucgr.C02886/Eucgr.D00642/Eucgr.D01061/Eucgr.D02427/Eucgr.E00139/Eucgr.E02414/Eucgr.E03208/Eucgr.F02686/Eucgr.G00556/Eucgr.G02854/Eucgr.H04314/Eucgr.H04418/Eucgr.H04632/Eucgr.H04789/Eucgr.I01475/Eucgr.I02503/Eucgr.J02086	23
GO:0072521	purine-containing compound metabolic process	BP	37/1511	150/9326	4.68E-03	2.12E-02	Eucgr.A00534/Eucgr.A00642/Eucgr.A00733/Eucgr.A00868/Eucgr.A01538/Eucgr.C00793/Eucgr.D01220/Eucgr.E00871/Eucgr.E02668/Eucgr.E03116/Eucgr.E03319/Eucgr.F01561/Eucgr.F01647/Eucgr.F01823/Eucgr.F02506/Eucgr.F03307/Eucgr.G00660/Eucgr.G01788/Eucgr.G01905/Eucgr.G02224/Eucgr.H01087/Eucgr.H03663/Eucgr.I01911/Eucgr.I02089/Eucgr.I02171/Eucgr.I02773/Eucgr.J00008/Eucgr.J00270/Eucgr.J00327/Eucgr.J00610/Eucgr.J00…	37
GO:0040029	regulation of gene expression, epigenetic	BP	13/1511	38/9326	5.07E-03	2.22E-02	Eucgr.A02925/Eucgr.B02503/Eucgr.B03561/Eucgr.B03714/Eucgr.C00406/Eucgr.C03688/Eucgr.D02305/Eucgr.D02653/Eucgr.F01177/Eucgr.H03436/Eucgr.H04418/Eucgr.H04789/Eucgr.K02861	13
GO:0006090	pyruvate metabolic process	BP	15/1511	47/9326	5.67E-03	2.43E-02	Eucgr.A00868/Eucgr.A01538/Eucgr.B02495/Eucgr.F01561/Eucgr.F01647/Eucgr.F01823/Eucgr.F02506/Eucgr.F03161/Eucgr.H03642/Eucgr.J00008/Eucgr.J00327/Eucgr.J01749/Eucgr.J01952/Eucgr.K00768/Eucgr.K02073	15
GO:0009890	negative regulation of biosynthetic process	BP	15/1511	47/9326	5.67E-03	2.43E-02	Eucgr.A02083/Eucgr.B01356/Eucgr.B02503/Eucgr.B03381/Eucgr.B03561/Eucgr.C01809/Eucgr.C03688/Eucgr.D00483/Eucgr.E03350/Eucgr.F01177/Eucgr.F02571/Eucgr.G00556/Eucgr.G02360/Eucgr.I00536/Eucgr.K02861	15
GO:0044085	cellular component biogenesis	BP	93/1511	450/9326	6.16E-03	2.56E-02	Eucgr.A00190/Eucgr.A00286/Eucgr.A00993/Eucgr.A01050/Eucgr.A01411/Eucgr.A02017/Eucgr.A02139/Eucgr.A02303/Eucgr.A02344/Eucgr.A02507/Eucgr.A02575/Eucgr.B00173/Eucgr.B00382/Eucgr.B00628/Eucgr.B01028/Eucgr.B01360/Eucgr.B01428/Eucgr.B03662/Eucgr.B03848/Eucgr.C00241/Eucgr.C00619/Eucgr.C01159/Eucgr.C01715/Eucgr.C02153/Eucgr.C02168/Eucgr.C02726/Eucgr.C03194/Eucgr.C03953/Eucgr.C04084/Eucgr.C04131/Eucgr.C04…	93
GO:0009630	gravitropism	BP	8/1511	19/9326	6.57E-03	2.64E-02	Eucgr.B00238/Eucgr.B01356/Eucgr.C04138/Eucgr.G01779/Eucgr.K02348/Eucgr.K02431/Eucgr.K02930/Eucgr.L03513	8
GO:0009396	folic acid-containing compound biosynthetic process	BP	6/1511	12/9326	6.84E-03	2.69E-02	Eucgr.A02294/Eucgr.B02610/Eucgr.F01594/Eucgr.G02823/Eucgr.J02122/Eucgr.K03460	6
GO:0051049	regulation of transport	BP	13/1511	40/9326	8.23E-03	3.09E-02	Eucgr.A00035/Eucgr.A01050/Eucgr.A02017/Eucgr.B03506/Eucgr.D02473/Eucgr.E01037/Eucgr.F01498/Eucgr.F01982/Eucgr.H04632/Eucgr.I02790/Eucgr.K00914/Eucgr.K01030/Eucgr.K01031	13
GO:0043933	protein-containing complex subunit organization	BP	48/1511	212/9326	8.38E-03	3.13E-02	Eucgr.A00286/Eucgr.A00993/Eucgr.A01050/Eucgr.A02017/Eucgr.A02139/Eucgr.A02303/Eucgr.B01428/Eucgr.B01462/Eucgr.C00619/Eucgr.C04084/Eucgr.C04218/Eucgr.C04376/Eucgr.D01820/Eucgr.D02319/Eucgr.E02397/Eucgr.E02475/Eucgr.E04332/Eucgr.F01600/Eucgr.F03008/Eucgr.F03879/Eucgr.F03965/Eucgr.F04242/Eucgr.G00004/Eucgr.G00074/Eucgr.G02350/Eucgr.G02360/Eucgr.G02685/Eucgr.G03266/Eucgr.H00823/Eucgr.H01111/Eucgr.H02…	48
GO:0010119	regulation of stomatal movement	BP	7/1511	16/9326	8.55E-03	3.17E-02	Eucgr.C02815/Eucgr.C03168/Eucgr.C04019/Eucgr.J02086/Eucgr.K00737/Eucgr.K01030/Eucgr.K01031	7
GO:0007131	reciprocal meiotic recombination	BP	8/1511	20/9326	9.42E-03	3.35E-02	Eucgr.E00349/Eucgr.E00409/Eucgr.H00025/Eucgr.H02748/Eucgr.H02905/Eucgr.I00435/Eucgr.J00844/Eucgr.K00248	8
GO:0051241	negative regulation of multicellular organismal process	BP	8/1511	20/9326	9.42E-03	3.35E-02	Eucgr.A02017/Eucgr.A02925/Eucgr.B02582/Eucgr.C00824/Eucgr.E02414/Eucgr.G02854/Eucgr.H04418/Eucgr.H04789	8
GO:0031668	cellular response to extracellular stimulus	BP	9/1511	24/9326	9.70E-03	3.37E-02	Eucgr.A00257/Eucgr.A02303/Eucgr.B00238/Eucgr.B02478/Eucgr.B03506/Eucgr.E01504/Eucgr.H04632/Eucgr.H05054/Eucgr.L00156	9
GO:0004386	helicase activity	MF	53/1730	130/10610	2.03E-11	8.68E-09	Eucgr.A00214/Eucgr.A01177/Eucgr.B00242/Eucgr.B00583/Eucgr.B01028/Eucgr.B01360/Eucgr.B02279/Eucgr.B03621/Eucgr.C00066/Eucgr.C00406/Eucgr.C02886/Eucgr.D00002/Eucgr.D00296/Eucgr.D01365/Eucgr.D01628/Eucgr.D02270/Eucgr.D02305/Eucgr.D02653/Eucgr.E00064/Eucgr.E00567/Eucgr.E00638/Eucgr.E02391/Eucgr.F01600/Eucgr.F03013/Eucgr.F03572/Eucgr.F03979/Eucgr.G00345/Eucgr.G00556/Eucgr.G00562/Eucgr.G02228/Eucgr.G02…	53
GO:0140098	catalytic activity, acting on RNA	MF	72/1730	233/10610	1.67E-08	3.58E-06	Eucgr.A00214/Eucgr.A00956/Eucgr.A01054/Eucgr.A02322/Eucgr.A02496/Eucgr.B01028/Eucgr.B01310/Eucgr.B01360/Eucgr.B01555/Eucgr.B01628/Eucgr.B02279/Eucgr.B02467/Eucgr.B03621/Eucgr.C00066/Eucgr.C00069/Eucgr.C00406/Eucgr.C01077/Eucgr.C02511/Eucgr.C03173/Eucgr.C04030/Eucgr.D00245/Eucgr.D00282/Eucgr.D01365/Eucgr.D01689/Eucgr.D01929/Eucgr.D02586/Eucgr.D02653/Eucgr.E00064/Eucgr.E00567/Eucgr.E00854/Eucgr.E01…	72
GO:0140097	catalytic activity, acting on DNA	MF	44/1730	122/10610	8.26E-08	8.93E-06	Eucgr.A01754/Eucgr.A02236/Eucgr.A02303/Eucgr.B00242/Eucgr.B01945/Eucgr.B02615/Eucgr.B03662/Eucgr.B03882/Eucgr.C02886/Eucgr.C03174/Eucgr.D00002/Eucgr.D00296/Eucgr.D01139/Eucgr.D01628/Eucgr.D02616/Eucgr.E00349/Eucgr.E00638/Eucgr.E02391/Eucgr.F01600/Eucgr.F03013/Eucgr.F03572/Eucgr.F04135/Eucgr.G00562/Eucgr.G02569/Eucgr.H00025/Eucgr.H01043/Eucgr.H01157/Eucgr.H01340/Eucgr.H02748/Eucgr.H04558/Eucgr.H04…	44
GO:0003723	RNA binding	MF	109/1730	414/10610	8.33E-08	8.93E-06	Eucgr.A00093/Eucgr.A00286/Eucgr.A00608/Eucgr.A00913/Eucgr.A01322/Eucgr.A01411/Eucgr.A01591/Eucgr.A02139/Eucgr.A02371/Eucgr.A02507/Eucgr.B00129/Eucgr.B00614/Eucgr.B01310/Eucgr.B01418/Eucgr.B01428/Eucgr.B01462/Eucgr.B02279/Eucgr.B02314/Eucgr.B02454/Eucgr.B02495/Eucgr.B03594/Eucgr.B03714/Eucgr.B03733/Eucgr.B03826/Eucgr.B04011/Eucgr.C00066/Eucgr.C00155/Eucgr.C00406/Eucgr.C00625/Eucgr.C00628/Eucgr.C00…	109
GO:0051020	GTPase binding	MF	19/1730	43/10610	1.49E-05	1.06E-03	Eucgr.A00035/Eucgr.A00473/Eucgr.A00543/Eucgr.A00600/Eucgr.A02966/Eucgr.B00701/Eucgr.B03196/Eucgr.C00756/Eucgr.E01037/Eucgr.G01904/Eucgr.G03244/Eucgr.H03367/Eucgr.H04107/Eucgr.H04230/Eucgr.I01475/Eucgr.I01543/Eucgr.I02730/Eucgr.J01771/Eucgr.K02348	19
GO:0004519	endonuclease activity	MF	26/1730	70/10610	1.98E-05	1.06E-03	Eucgr.A02087/Eucgr.A02303/Eucgr.A02322/Eucgr.A02496/Eucgr.C00406/Eucgr.C03173/Eucgr.C04030/Eucgr.D00696/Eucgr.D01139/Eucgr.D02586/Eucgr.D02653/Eucgr.E00349/Eucgr.F01076/Eucgr.F03545/Eucgr.H00025/Eucgr.H01340/Eucgr.I00435/Eucgr.I01829/Eucgr.I01834/Eucgr.J00844/Eucgr.J01260/Eucgr.J02177/Eucgr.J02950/Eucgr.K00458/Eucgr.K01860/Eucgr.K02481	26
GO:0016874	ligase activity	MF	64/1730	243/10610	3.92E-05	1.86E-03	Eucgr.A00261/Eucgr.A00643/Eucgr.A00956/Eucgr.A01178/Eucgr.A01456/Eucgr.A01617/Eucgr.A02294/Eucgr.B00369/Eucgr.B01310/Eucgr.B01495/Eucgr.B01628/Eucgr.B02467/Eucgr.B02478/Eucgr.B02610/Eucgr.B02769/Eucgr.B03943/Eucgr.C01033/Eucgr.C01814/Eucgr.D00245/Eucgr.D01840/Eucgr.D02624/Eucgr.E01025/Eucgr.E01106/Eucgr.E03515/Eucgr.E03926/Eucgr.F00711/Eucgr.F02042/Eucgr.F02160/Eucgr.F02880/Eucgr.F03261/Eucgr.F04…	64
GO:0003697	single-stranded DNA binding	MF	10/1730	17/10610	8.31E-05	3.56E-03	Eucgr.A02303/Eucgr.B00672/Eucgr.D01628/Eucgr.E00349/Eucgr.H00025/Eucgr.I00435/Eucgr.I01829/Eucgr.J00844/Eucgr.J01999/Eucgr.J02948	10
GO:0008565	protein transporter activity	MF	18/1730	46/10610	1.71E-04	5.07E-03	Eucgr.A00001/Eucgr.A00543/Eucgr.A00600/Eucgr.A00607/Eucgr.B00583/Eucgr.B03952/Eucgr.C00951/Eucgr.C01579/Eucgr.F03483/Eucgr.G01904/Eucgr.H03281/Eucgr.H04107/Eucgr.I02730/Eucgr.J00415/Eucgr.J01771/Eucgr.K00283/Eucgr.K02232/Eucgr.K03215	18
GO:0016779	nucleotidyltransferase activity	MF	39/1730	136/10610	1.89E-04	5.07E-03	Eucgr.A01054/Eucgr.B01945/Eucgr.B02538/Eucgr.B03882/Eucgr.C00069/Eucgr.C02511/Eucgr.C02886/Eucgr.D00343/Eucgr.D01929/Eucgr.D02494/Eucgr.E00854/Eucgr.E01577/Eucgr.E03441/Eucgr.E03445/Eucgr.E03926/Eucgr.F00711/Eucgr.F00715/Eucgr.F01119/Eucgr.F02088/Eucgr.F03540/Eucgr.F04135/Eucgr.G00853/Eucgr.G01370/Eucgr.G02092/Eucgr.H00421/Eucgr.I02304/Eucgr.I02582/Eucgr.J00183/Eucgr.J00614/Eucgr.J01999/Eucgr.J02…	39
GO:0042802	identical protein binding	MF	22/1730	65/10610	3.99E-04	9.51E-03	Eucgr.B00015/Eucgr.B01356/Eucgr.B03196/Eucgr.B03662/Eucgr.C02815/Eucgr.D01044/Eucgr.D02251/Eucgr.E02954/Eucgr.F00651/Eucgr.F03510/Eucgr.F04303/Eucgr.F04428/Eucgr.G01732/Eucgr.G02360/Eucgr.G02967/Eucgr.I02503/Eucgr.I02694/Eucgr.J02086/Eucgr.J02838/Eucgr.K00727/Eucgr.K00737/Eucgr.K03574	22
GO:0140101	catalytic activity, acting on a tRNA	MF	23/1730	71/10610	6.06E-04	1.30E-02	Eucgr.A00956/Eucgr.A02322/Eucgr.B01310/Eucgr.B01628/Eucgr.C01077/Eucgr.D00245/Eucgr.D02586/Eucgr.E01106/Eucgr.F03545/Eucgr.F04425/Eucgr.G01975/Eucgr.H00023/Eucgr.H00404/Eucgr.H04746/Eucgr.H05005/Eucgr.I00532/Eucgr.I01063/Eucgr.J00005/Eucgr.J00041/Eucgr.J00690/Eucgr.J00856/Eucgr.J01408/Eucgr.K02994	23
GO:0008094	DNA-dependent ATPase activity	MF	15/1730	40/10610	9.94E-04	1.94E-02	Eucgr.A01177/Eucgr.A02236/Eucgr.A02303/Eucgr.B03662/Eucgr.D01139/Eucgr.D02305/Eucgr.E00638/Eucgr.F03013/Eucgr.F03572/Eucgr.G00562/Eucgr.H00025/Eucgr.H02748/Eucgr.I00435/Eucgr.J00591/Eucgr.J00844	15
GO:0016891	endoribonuclease activity, producing 5'-phosphomonoesters	MF	9/1730	20/10610	2.41E-03	3.96E-02	Eucgr.C00406/Eucgr.C03173/Eucgr.C04030/Eucgr.D02586/Eucgr.D02653/Eucgr.F03545/Eucgr.I01834/Eucgr.J02177/Eucgr.J02950	9
GO:0044428	nuclear part	CC	120/1423	400/8542	8.10E-12	1.29E-09	Eucgr.A00286/Eucgr.A00543/Eucgr.A00600/Eucgr.A01374/Eucgr.A01411/Eucgr.A01754/Eucgr.A02139/Eucgr.A02322/Eucgr.A02507/Eucgr.A02992/Eucgr.B00394/Eucgr.B00544/Eucgr.B00704/Eucgr.B00853/Eucgr.B01356/Eucgr.B01428/Eucgr.B01452/Eucgr.B01555/Eucgr.B01556/Eucgr.B02119/Eucgr.B02434/Eucgr.B02596/Eucgr.B03381/Eucgr.B03561/Eucgr.B03882/Eucgr.B04011/Eucgr.C00066/Eucgr.C00069/Eucgr.C00155/Eucgr.C00824/Eucgr.C01…	120
GO:0098588	bounding membrane of organelle	CC	89/1423	282/8542	2.67E-10	2.12E-08	Eucgr.A00254/Eucgr.A00509/Eucgr.A00534/Eucgr.A01050/Eucgr.A01129/Eucgr.A02017/Eucgr.A02776/Eucgr.A02778/Eucgr.B00015/Eucgr.B00173/Eucgr.B00317/Eucgr.B00481/Eucgr.B00707/Eucgr.B00717/Eucgr.B00855/Eucgr.B01990/Eucgr.B02594/Eucgr.B02887/Eucgr.B03069/Eucgr.B03390/Eucgr.C00132/Eucgr.C00739/Eucgr.C01004/Eucgr.C01277/Eucgr.C02867/Eucgr.C04138/Eucgr.D00483/Eucgr.D01026/Eucgr.D01430/Eucgr.D01657/Eucgr.D01…	89
GO:0031974	membrane-enclosed lumen	CC	92/1423	322/8542	3.57E-08	8.10E-07	Eucgr.A00600/Eucgr.A00913/Eucgr.A01374/Eucgr.A01411/Eucgr.A01754/Eucgr.A02139/Eucgr.A02507/Eucgr.A02992/Eucgr.B00704/Eucgr.B00853/Eucgr.B01112/Eucgr.B01356/Eucgr.B01452/Eucgr.B01556/Eucgr.B02119/Eucgr.B02434/Eucgr.B02596/Eucgr.B03381/Eucgr.B03561/Eucgr.B03882/Eucgr.C00066/Eucgr.C00069/Eucgr.C00480/Eucgr.C00824/Eucgr.C01077/Eucgr.C01159/Eucgr.C01716/Eucgr.C03068/Eucgr.C03174/Eucgr.C03688/Eucgr.D00…	92
GO:0043233	organelle lumen	CC	92/1423	322/8542	3.57E-08	8.10E-07	Eucgr.A00600/Eucgr.A00913/Eucgr.A01374/Eucgr.A01411/Eucgr.A01754/Eucgr.A02139/Eucgr.A02507/Eucgr.A02992/Eucgr.B00704/Eucgr.B00853/Eucgr.B01112/Eucgr.B01356/Eucgr.B01452/Eucgr.B01556/Eucgr.B02119/Eucgr.B02434/Eucgr.B02596/Eucgr.B03381/Eucgr.B03561/Eucgr.B03882/Eucgr.C00066/Eucgr.C00069/Eucgr.C00480/Eucgr.C00824/Eucgr.C01077/Eucgr.C01159/Eucgr.C01716/Eucgr.C03068/Eucgr.C03174/Eucgr.C03688/Eucgr.D00…	92
GO:0098805	whole membrane	CC	69/1423	229/8542	2.15E-07	3.06E-06	Eucgr.A00509/Eucgr.A00534/Eucgr.A01050/Eucgr.A01129/Eucgr.A02017/Eucgr.A02776/Eucgr.A02778/Eucgr.B00015/Eucgr.B00173/Eucgr.B00317/Eucgr.B00481/Eucgr.B00717/Eucgr.B00855/Eucgr.B01990/Eucgr.B02594/Eucgr.C00132/Eucgr.C00241/Eucgr.C00739/Eucgr.C01277/Eucgr.C04138/Eucgr.D00483/Eucgr.D01026/Eucgr.D01430/Eucgr.D01835/Eucgr.D02141/Eucgr.D02156/Eucgr.D02301/Eucgr.E00053/Eucgr.E00189/Eucgr.E01240/Eucgr.E03…	69
GO:0097708	intracellular vesicle	CC	52/1423	157/8542	2.72E-07	3.09E-06	Eucgr.A00257/Eucgr.A00509/Eucgr.A00913/Eucgr.A01050/Eucgr.A02017/Eucgr.A02575/Eucgr.A02776/Eucgr.B00481/Eucgr.B00701/Eucgr.B00707/Eucgr.B02594/Eucgr.B03053/Eucgr.B03196/Eucgr.B04005/Eucgr.C02726/Eucgr.C04138/Eucgr.C04398/Eucgr.D00196/Eucgr.D00483/Eucgr.D01026/Eucgr.D01835/Eucgr.D02141/Eucgr.D02301/Eucgr.D02473/Eucgr.E01240/Eucgr.F01568/Eucgr.F02737/Eucgr.F03341/Eucgr.F03682/Eucgr.F04117/Eucgr.F04…	52
GO:0031982	vesicle	CC	52/1423	158/8542	3.41E-07	3.61E-06	Eucgr.A00257/Eucgr.A00509/Eucgr.A00913/Eucgr.A01050/Eucgr.A02017/Eucgr.A02575/Eucgr.A02776/Eucgr.B00481/Eucgr.B00701/Eucgr.B00707/Eucgr.B02594/Eucgr.B03053/Eucgr.B03196/Eucgr.B04005/Eucgr.C02726/Eucgr.C04138/Eucgr.C04398/Eucgr.D00196/Eucgr.D00483/Eucgr.D01026/Eucgr.D01835/Eucgr.D02141/Eucgr.D02301/Eucgr.D02473/Eucgr.E01240/Eucgr.F01568/Eucgr.F02737/Eucgr.F03341/Eucgr.F03682/Eucgr.F04117/Eucgr.F04…	52
GO:0030117	membrane coat	CC	17/1423	33/8542	4.25E-06	3.38E-05	Eucgr.A00509/Eucgr.B02594/Eucgr.B03952/Eucgr.C01579/Eucgr.D00483/Eucgr.D01026/Eucgr.F03011/Eucgr.F03442/Eucgr.G01708/Eucgr.G01711/Eucgr.G03075/Eucgr.H03169/Eucgr.J00193/Eucgr.J00415/Eucgr.J03008/Eucgr.K00564/Eucgr.K02232	17
GO:0048475	coated membrane	CC	17/1423	33/8542	4.25E-06	3.38E-05	Eucgr.A00509/Eucgr.B02594/Eucgr.B03952/Eucgr.C01579/Eucgr.D00483/Eucgr.D01026/Eucgr.F03011/Eucgr.F03442/Eucgr.G01708/Eucgr.G01711/Eucgr.G03075/Eucgr.H03169/Eucgr.J00193/Eucgr.J00415/Eucgr.J03008/Eucgr.K00564/Eucgr.K02232	17
GO:1902494	catalytic complex	CC	84/1423	327/8542	1.56E-05	1.13E-04	Eucgr.A00016/Eucgr.A00261/Eucgr.A02290/Eucgr.A02322/Eucgr.B00160/Eucgr.B00544/Eucgr.B00704/Eucgr.B00853/Eucgr.B01476/Eucgr.B01556/Eucgr.B01945/Eucgr.B02434/Eucgr.B02769/Eucgr.B03381/Eucgr.B03640/Eucgr.B03772/Eucgr.B03882/Eucgr.C00069/Eucgr.C00155/Eucgr.C00241/Eucgr.C00824/Eucgr.C01428/Eucgr.C01723/Eucgr.C03168/Eucgr.C04084/Eucgr.D00245/Eucgr.D00282/Eucgr.D02586/Eucgr.E00258/Eucgr.E02414/Eucgr.E03…	84
GO:0005694	chromosome	CC	40/1423	130/8542	4.47E-05	2.93E-04	Eucgr.A01107/Eucgr.A01754/Eucgr.A02236/Eucgr.A02895/Eucgr.A02992/Eucgr.B00704/Eucgr.B01452/Eucgr.B01550/Eucgr.B02434/Eucgr.B03381/Eucgr.B03561/Eucgr.B03882/Eucgr.C03174/Eucgr.C03688/Eucgr.D01236/Eucgr.E00362/Eucgr.E00409/Eucgr.E00854/Eucgr.F01076/Eucgr.F03008/Eucgr.G00562/Eucgr.G01927/Eucgr.H00025/Eucgr.H00037/Eucgr.H01928/Eucgr.H02905/Eucgr.H03855/Eucgr.H04558/Eucgr.H04963/Eucgr.I00435/Eucgr.I01…	40
GO:0042175	nuclear outer membrane-endoplasmic reticulum membrane network	CC	34/1423	110/8542	1.48E-04	7.58E-04	Eucgr.A00001/Eucgr.A00285/Eucgr.A02290/Eucgr.A02776/Eucgr.A02967/Eucgr.B00238/Eucgr.B01001/Eucgr.B03069/Eucgr.B03480/Eucgr.C00633/Eucgr.C00745/Eucgr.C03168/Eucgr.D00052/Eucgr.D01835/Eucgr.D02141/Eucgr.D02301/Eucgr.D02473/Eucgr.E00370/Eucgr.F03682/Eucgr.F03982/Eucgr.G01979/Eucgr.G02477/Eucgr.G02933/Eucgr.G03076/Eucgr.H02550/Eucgr.H02617/Eucgr.J00522/Eucgr.J02078/Eucgr.J02086/Eucgr.K00091/Eucgr.K01…	34
GO:0098562	cytoplasmic side of membrane	CC	7/1423	12/8542	1.28E-03	4.32E-03	Eucgr.A02776/Eucgr.B01476/Eucgr.C03168/Eucgr.D01835/Eucgr.D02301/Eucgr.H02617/Eucgr.I02026	7
GO:0031975	envelope	CC	75/1423	327/8542	1.74E-03	5.41E-03	Eucgr.A00509/Eucgr.A00534/Eucgr.A00543/Eucgr.A00600/Eucgr.A00607/Eucgr.A00911/Eucgr.A00993/Eucgr.A02836/Eucgr.B00021/Eucgr.B01556/Eucgr.B01990/Eucgr.B02421/Eucgr.B02495/Eucgr.B02532/Eucgr.B02721/Eucgr.B03367/Eucgr.C00132/Eucgr.C00142/Eucgr.C00667/Eucgr.C02103/Eucgr.C04218/Eucgr.C04235/Eucgr.D00185/Eucgr.D02319/Eucgr.E00189/Eucgr.E01449/Eucgr.E02954/Eucgr.E03356/Eucgr.F00477/Eucgr.F02948/Eucgr.F04…	75
GO:0019898	extrinsic component of membrane	CC	14/1423	41/8542	4.86E-03	1.29E-02	Eucgr.B01476/Eucgr.B04005/Eucgr.C00100/Eucgr.C03168/Eucgr.D01986/Eucgr.E01352/Eucgr.G02107/Eucgr.H00086/Eucgr.H02571/Eucgr.I01159/Eucgr.I02026/Eucgr.J00097/Eucgr.K00929/Eucgr.K02348	14
GO:0019012	virion	CC	12/1423	34/8542	6.60E-03	1.55E-02	Eucgr.A02297/Eucgr.B00583/Eucgr.B01475/Eucgr.B04011/Eucgr.C00155/Eucgr.C04084/Eucgr.C04091/Eucgr.D01204/Eucgr.H00136/Eucgr.H01111/Eucgr.K00657/Eucgr.K01365	12
GO:0044423	virion part	CC	12/1423	34/8542	6.60E-03	1.55E-02	Eucgr.A02297/Eucgr.B00583/Eucgr.B01475/Eucgr.B04011/Eucgr.C00155/Eucgr.C04084/Eucgr.C04091/Eucgr.D01204/Eucgr.H00136/Eucgr.H01111/Eucgr.K00657/Eucgr.K01365	12
GO:0019013	viral nucleocapsid	CC	11/1423	30/8542	6.63E-03	1.55E-02	Eucgr.A02297/Eucgr.B00583/Eucgr.B04011/Eucgr.C00155/Eucgr.C04084/Eucgr.C04091/Eucgr.D01204/Eucgr.H00136/Eucgr.H01111/Eucgr.K00657/Eucgr.K01365	11
GO:0005938	cell cortex	CC	10/1423	27/8542	8.77E-03	1.88E-02	Eucgr.A00473/Eucgr.D00655/Eucgr.E02482/Eucgr.F04242/Eucgr.G02511/Eucgr.G03261/Eucgr.H00823/Eucgr.J00280/Eucgr.K02187/Eucgr.K03590	10
GO:0099568	cytoplasmic region	CC	10/1423	27/8542	8.77E-03	1.88E-02	Eucgr.A00473/Eucgr.D00655/Eucgr.E02482/Eucgr.F04242/Eucgr.G02511/Eucgr.G03261/Eucgr.H00823/Eucgr.J00280/Eucgr.K02187/Eucgr.K03590	10

## Sheet: Juvenile leaves
Enriched GO terms considering the set of all methylated genes in juvenile leaves.
ID	Description	Ontology	GeneRatio	BgRatio	pvalue	qvalue	geneID	Count
GO:0051641	cellular localization	BP	102/1565	322/9326	1.66158e-11	1.46918e-08	Eucgr.A00001/Eucgr.A00035/Eucgr.A00332/Eucgr.A00473/Eucgr.A00543/Eucgr.A00600/Eucgr.A00607/Eucgr.A00647/Eucgr.A01050/Eucgr.A02017/Eucgr.A02575/Eucgr.A02966/Eucgr.A02967/Eucgr.A02971/Eucgr.B00317/Eucgr.B00583/Eucgr.B02209/Eucgr.B02594/Eucgr.B03196/Eucgr.B03952/Eucgr.C00132/Eucgr.C00480/Eucgr.C00627/Eucgr.C01579/Eucgr.C02867/Eucgr.C04138/Eucgr.D00483/Eucgr.D00655/Eucgr.D01026/Eucgr.D01986/Eucgr.D02…	102
GO:0008104	protein localization	BP	93/1565	294/9326	1.46588e-10	6.48074e-08	Eucgr.A00001/Eucgr.A00035/Eucgr.A00332/Eucgr.A00473/Eucgr.A00543/Eucgr.A00600/Eucgr.A00607/Eucgr.A00647/Eucgr.A01050/Eucgr.A02017/Eucgr.A02575/Eucgr.A02966/Eucgr.A02967/Eucgr.A02971/Eucgr.B00317/Eucgr.B00583/Eucgr.B02209/Eucgr.B02594/Eucgr.B03952/Eucgr.C00132/Eucgr.C00480/Eucgr.C00627/Eucgr.C00951/Eucgr.C01046/Eucgr.C01579/Eucgr.C02867/Eucgr.C03673/Eucgr.C03936/Eucgr.C04138/Eucgr.D00483/Eucgr.D00…	93
GO:0051649	establishment of localization in cell	BP	85/1565	265/9326	4.28008e-10	9.46122e-08	Eucgr.A00001/Eucgr.A00035/Eucgr.A00332/Eucgr.A00543/Eucgr.A00600/Eucgr.A00607/Eucgr.A00647/Eucgr.A01050/Eucgr.A02017/Eucgr.A02575/Eucgr.A02966/Eucgr.A02971/Eucgr.B00317/Eucgr.B00583/Eucgr.B02209/Eucgr.B02594/Eucgr.B03196/Eucgr.B03952/Eucgr.C00132/Eucgr.C00480/Eucgr.C00627/Eucgr.C01579/Eucgr.C02867/Eucgr.C04138/Eucgr.D00483/Eucgr.D00655/Eucgr.D01026/Eucgr.D02427/Eucgr.D02446/Eucgr.D02473/Eucgr.D02…	85
GO:0015833	peptide transport	BP	81/1565	275/9326	8.26023e-08	7.30378e-06	Eucgr.A00001/Eucgr.A00035/Eucgr.A00332/Eucgr.A00543/Eucgr.A00600/Eucgr.A00607/Eucgr.A00647/Eucgr.A01050/Eucgr.A02017/Eucgr.A02966/Eucgr.A02967/Eucgr.A02971/Eucgr.B00317/Eucgr.B00583/Eucgr.B02209/Eucgr.B02594/Eucgr.B02629/Eucgr.B03952/Eucgr.C00132/Eucgr.C00480/Eucgr.C00627/Eucgr.C00951/Eucgr.C01046/Eucgr.C01579/Eucgr.C02867/Eucgr.C03673/Eucgr.C03936/Eucgr.C04138/Eucgr.D00483/Eucgr.D00655/Eucgr.D02…	81
GO:0009605	response to external stimulus	BP	55/1565	165/9326	1.28106e-07	1.02975e-05	Eucgr.A00257/Eucgr.A00285/Eucgr.A00908/Eucgr.A02946/Eucgr.B00238/Eucgr.B00544/Eucgr.B00853/Eucgr.B01356/Eucgr.B01476/Eucgr.B02209/Eucgr.B02470/Eucgr.B02478/Eucgr.B02495/Eucgr.B03196/Eucgr.B03506/Eucgr.C00406/Eucgr.C04019/Eucgr.C04138/Eucgr.D00642/Eucgr.D00839/Eucgr.D01061/Eucgr.E00577/Eucgr.E01026/Eucgr.E01504/Eucgr.E03208/Eucgr.F02954/Eucgr.F03423/Eucgr.F04303/Eucgr.F04428/Eucgr.G00990/Eucgr.G01…	55
GO:0006259	DNA metabolic process	BP	76/1565	256/9326	1.45953e-07	1.07544e-05	Eucgr.A01177/Eucgr.A01547/Eucgr.A01754/Eucgr.A02236/Eucgr.B00242/Eucgr.B00672/Eucgr.B00704/Eucgr.B01452/Eucgr.B01945/Eucgr.B02615/Eucgr.B03561/Eucgr.B03662/Eucgr.B03882/Eucgr.C01723/Eucgr.C02886/Eucgr.C03174/Eucgr.C03861/Eucgr.D00002/Eucgr.D00367/Eucgr.D00435/Eucgr.D00483/Eucgr.D00696/Eucgr.D01139/Eucgr.D01236/Eucgr.D01628/Eucgr.D02616/Eucgr.E00349/Eucgr.E00409/Eucgr.E00638/Eucgr.E02391/Eucgr.E02…	76
GO:0051128	regulation of cellular component organization	BP	33/1565	88/9326	2.34126e-06	0.000128661	Eucgr.A00035/Eucgr.A01050/Eucgr.A02017/Eucgr.B00609/Eucgr.B03561/Eucgr.C00100/Eucgr.C00824/Eucgr.C03194/Eucgr.C03799/Eucgr.C04376/Eucgr.D00427/Eucgr.D01840/Eucgr.E04332/Eucgr.F01177/Eucgr.F01600/Eucgr.F03069/Eucgr.F04480/Eucgr.G02360/Eucgr.H00823/Eucgr.H02768/Eucgr.H02816/Eucgr.H03031/Eucgr.H04037/Eucgr.I01462/Eucgr.I01475/Eucgr.I02503/Eucgr.J02123/Eucgr.J02844/Eucgr.K00914/Eucgr.K01213/Eucgr.K02…	33
GO:0035556	intracellular signal transduction	BP	72/1565	255/9326	2.47366e-06	0.000128661	Eucgr.A00332/Eucgr.A00779/Eucgr.A00803/Eucgr.A00805/Eucgr.A01405/Eucgr.A01527/Eucgr.A02545/Eucgr.B00215/Eucgr.B00222/Eucgr.B00380/Eucgr.B00544/Eucgr.B00575/Eucgr.B00871/Eucgr.B01052/Eucgr.B01356/Eucgr.B01990/Eucgr.B02547/Eucgr.B03196/Eucgr.B03506/Eucgr.C00012/Eucgr.C00380/Eucgr.C00756/Eucgr.C01141/Eucgr.C03813/Eucgr.C04019/Eucgr.D00474/Eucgr.D00642/Eucgr.D01430/Eucgr.E00022/Eucgr.E00308/Eucgr.E00…	72
GO:0022402	cell cycle process	BP	38/1565	109/9326	3.30416e-06	0.00016231	Eucgr.A01107/Eucgr.A01177/Eucgr.A02895/Eucgr.B00711/Eucgr.B01452/Eucgr.B03196/Eucgr.B03662/Eucgr.C02726/Eucgr.C02886/Eucgr.D00483/Eucgr.D00655/Eucgr.E00053/Eucgr.E00349/Eucgr.E00409/Eucgr.E02475/Eucgr.F00650/Eucgr.F03311/Eucgr.F03341/Eucgr.F03505/Eucgr.F03751/Eucgr.F04480/Eucgr.G02908/Eucgr.H00025/Eucgr.H02748/Eucgr.H02905/Eucgr.H04558/Eucgr.I00013/Eucgr.I00435/Eucgr.I02064/Eucgr.J00601/Eucgr.J00…	38
GO:0051276	chromosome organization	BP	51/1565	164/9326	3.79296e-06	0.000176515	Eucgr.A01107/Eucgr.A01754/Eucgr.A02133/Eucgr.A02236/Eucgr.A02895/Eucgr.B00704/Eucgr.B01452/Eucgr.B01457/Eucgr.B01550/Eucgr.B01556/Eucgr.B03381/Eucgr.B03561/Eucgr.B03662/Eucgr.C00619/Eucgr.C00824/Eucgr.C03174/Eucgr.D00002/Eucgr.D01628/Eucgr.D02305/Eucgr.E00409/Eucgr.E00638/Eucgr.E02391/Eucgr.F01177/Eucgr.F03008/Eucgr.F03013/Eucgr.F03572/Eucgr.F03851/Eucgr.F04062/Eucgr.F04379/Eucgr.F04480/Eucgr.G00…	51
GO:0048583	regulation of response to stimulus	BP	53/1565	173/9326	4.04472e-06	0.000178819	Eucgr.A00170/Eucgr.A00285/Eucgr.A00803/Eucgr.A00805/Eucgr.A01454/Eucgr.B00222/Eucgr.B00711/Eucgr.B00853/Eucgr.B01052/Eucgr.B02547/Eucgr.B02582/Eucgr.B03056/Eucgr.B03196/Eucgr.C00739/Eucgr.C00756/Eucgr.C01141/Eucgr.C03168/Eucgr.C04019/Eucgr.D00289/Eucgr.D00642/Eucgr.E02414/Eucgr.E02497/Eucgr.E03208/Eucgr.E03814/Eucgr.F02686/Eucgr.F03336/Eucgr.F03415/Eucgr.G00037/Eucgr.G00556/Eucgr.G01779/Eucgr.G02…	53
GO:0048519	negative regulation of biological process	BP	58/1565	198/9326	6.87689e-06	0.000264375	Eucgr.A02017/Eucgr.A02083/Eucgr.A02925/Eucgr.B00033/Eucgr.B00711/Eucgr.B01356/Eucgr.B01774/Eucgr.B02582/Eucgr.B03381/Eucgr.B03506/Eucgr.B03561/Eucgr.B03714/Eucgr.B03826/Eucgr.C00406/Eucgr.C00739/Eucgr.C00824/Eucgr.C03168/Eucgr.C04019/Eucgr.D00289/Eucgr.D00483/Eucgr.D02653/Eucgr.E02414/Eucgr.E02475/Eucgr.E03350/Eucgr.F01177/Eucgr.F02571/Eucgr.F02825/Eucgr.F03751/Eucgr.F03766/Eucgr.F04480/Eucgr.G00…	58
GO:1901135	carbohydrate derivative metabolic process	BP	79/1565	295/9326	7.43575e-06	0.000273949	Eucgr.A00423/Eucgr.A00534/Eucgr.A00868/Eucgr.A01374/Eucgr.A01538/Eucgr.A02290/Eucgr.A02946/Eucgr.B00341/Eucgr.B00532/Eucgr.B00660/Eucgr.B02421/Eucgr.B02495/Eucgr.B03480/Eucgr.B03528/Eucgr.C00320/Eucgr.C00495/Eucgr.D00343/Eucgr.D01220/Eucgr.D01657/Eucgr.E00189/Eucgr.E00871/Eucgr.E02668/Eucgr.E03445/Eucgr.F01561/Eucgr.F01594/Eucgr.F01647/Eucgr.F01823/Eucgr.F02260/Eucgr.F02367/Eucgr.F02506/Eucgr.F02…	79
GO:0009791	post-embryonic development	BP	71/1565	260/9326	1.04415e-05	0.00034885	Eucgr.A00534/Eucgr.A01411/Eucgr.A02139/Eucgr.A02925/Eucgr.B00238/Eucgr.B00394/Eucgr.B00544/Eucgr.B00711/Eucgr.B01356/Eucgr.B01476/Eucgr.B02532/Eucgr.B02582/Eucgr.B03196/Eucgr.B03436/Eucgr.B03506/Eucgr.B03714/Eucgr.C00066/Eucgr.C00633/Eucgr.C00739/Eucgr.C00824/Eucgr.C01007/Eucgr.C01428/Eucgr.C02886/Eucgr.C04030/Eucgr.C04138/Eucgr.D00264/Eucgr.D00642/Eucgr.D01061/Eucgr.D02427/Eucgr.E00053/Eucgr.E00…	71
GO:0043603	cellular amide metabolic process	BP	112/1565	458/9326	1.09975e-05	0.00034885	Eucgr.A00019/Eucgr.A00214/Eucgr.A00394/Eucgr.A00608/Eucgr.A00913/Eucgr.A00956/Eucgr.A01322/Eucgr.A02083/Eucgr.A02294/Eucgr.A02359/Eucgr.A02371/Eucgr.A02510/Eucgr.A02776/Eucgr.A02903/Eucgr.B00021/Eucgr.B00214/Eucgr.B01310/Eucgr.B01356/Eucgr.B01418/Eucgr.B01462/Eucgr.B01599/Eucgr.B01628/Eucgr.B01908/Eucgr.B02210/Eucgr.B02610/Eucgr.B02912/Eucgr.B03469/Eucgr.B03662/Eucgr.B03850/Eucgr.C00652/Eucgr.C00…	112
GO:0007275	multicellular organism development	BP	113/1565	463/9326	1.10469e-05	0.00034885	Eucgr.A00534/Eucgr.A01177/Eucgr.A01411/Eucgr.A01456/Eucgr.A02017/Eucgr.A02139/Eucgr.A02507/Eucgr.A02925/Eucgr.B00238/Eucgr.B00394/Eucgr.B00544/Eucgr.B00711/Eucgr.B01356/Eucgr.B01476/Eucgr.B02504/Eucgr.B02532/Eucgr.B02582/Eucgr.B02721/Eucgr.B03196/Eucgr.B03436/Eucgr.B03506/Eucgr.B03662/Eucgr.B03714/Eucgr.C00066/Eucgr.C00406/Eucgr.C00633/Eucgr.C00739/Eucgr.C00824/Eucgr.C01007/Eucgr.C01428/Eucgr.C01…	113
GO:0010033	response to organic substance	BP	85/1565	327/9326	1.18028e-05	0.000359867	Eucgr.A00141/Eucgr.A00170/Eucgr.A00257/Eucgr.A00534/Eucgr.A02545/Eucgr.B00015/Eucgr.B00033/Eucgr.B00238/Eucgr.B00341/Eucgr.B00369/Eucgr.B00544/Eucgr.B00660/Eucgr.B02421/Eucgr.B02495/Eucgr.B03154/Eucgr.B03506/Eucgr.B03662/Eucgr.B03714/Eucgr.B03812/Eucgr.C00480/Eucgr.C00633/Eucgr.C00739/Eucgr.C01007/Eucgr.C02178/Eucgr.C03168/Eucgr.C03293/Eucgr.C04019/Eucgr.C04235/Eucgr.D00264/Eucgr.D00289/Eucgr.D00…	85
GO:0016192	vesicle-mediated transport	BP	62/1565	220/9326	1.30533e-05	0.000384729	Eucgr.A00035/Eucgr.A00332/Eucgr.A00473/Eucgr.A01050/Eucgr.A01905/Eucgr.A02017/Eucgr.A02575/Eucgr.B00707/Eucgr.B02594/Eucgr.B03196/Eucgr.B03390/Eucgr.B03952/Eucgr.B04005/Eucgr.C00100/Eucgr.C01004/Eucgr.C01579/Eucgr.C02306/Eucgr.C02758/Eucgr.C02867/Eucgr.C03799/Eucgr.C04138/Eucgr.D00483/Eucgr.D01026/Eucgr.D01986/Eucgr.D02473/Eucgr.D02557/Eucgr.D02650/Eucgr.E00053/Eucgr.E00370/Eucgr.E02021/Eucgr.F03…	62
GO:0006974	cellular response to DNA damage stimulus	BP	51/1565	171/9326	1.4112e-05	0.000401482	Eucgr.A01177/Eucgr.A01547/Eucgr.A01754/Eucgr.B00242/Eucgr.B00704/Eucgr.B01452/Eucgr.B01945/Eucgr.B03882/Eucgr.C01723/Eucgr.C03174/Eucgr.C03861/Eucgr.D00367/Eucgr.E00349/Eucgr.E00409/Eucgr.E00638/Eucgr.E02414/Eucgr.F01076/Eucgr.F01600/Eucgr.F03261/Eucgr.G00023/Eucgr.G00562/Eucgr.G02569/Eucgr.H00025/Eucgr.H00464/Eucgr.H00676/Eucgr.H01157/Eucgr.H01340/Eucgr.H01686/Eucgr.H02905/Eucgr.H04558/Eucgr.H04…	51
GO:0033554	cellular response to stress	BP	69/1565	253/9326	1.45298e-05	0.000401482	Eucgr.A00257/Eucgr.A00285/Eucgr.A01177/Eucgr.A01547/Eucgr.A01754/Eucgr.B00242/Eucgr.B00341/Eucgr.B00704/Eucgr.B01452/Eucgr.B01760/Eucgr.B01945/Eucgr.B03154/Eucgr.B03506/Eucgr.B03882/Eucgr.C00480/Eucgr.C01723/Eucgr.C03174/Eucgr.C03861/Eucgr.C04019/Eucgr.D00367/Eucgr.D00414/Eucgr.E00349/Eucgr.E00351/Eucgr.E00409/Eucgr.E00638/Eucgr.E01504/Eucgr.E02414/Eucgr.F00332/Eucgr.F01076/Eucgr.F01600/Eucgr.F03…	69
GO:0048523	negative regulation of cellular process	BP	36/1565	110/9326	2.92867e-05	0.000761637	Eucgr.A02083/Eucgr.B01356/Eucgr.B01774/Eucgr.B03381/Eucgr.B03561/Eucgr.C00739/Eucgr.C03168/Eucgr.C04019/Eucgr.D00289/Eucgr.D00483/Eucgr.E02475/Eucgr.E03350/Eucgr.F01177/Eucgr.F02571/Eucgr.F02825/Eucgr.F03751/Eucgr.F04480/Eucgr.G00556/Eucgr.G02360/Eucgr.G03219/Eucgr.H00823/Eucgr.H02748/Eucgr.H04042/Eucgr.H04558/Eucgr.I00013/Eucgr.I00536/Eucgr.I02466/Eucgr.I02503/Eucgr.J01260/Eucgr.J02086/Eucgr.K00…	36
GO:1901137	carbohydrate derivative biosynthetic process	BP	51/1565	176/9326	3.34905e-05	0.000822573	Eucgr.A00534/Eucgr.A00868/Eucgr.A01374/Eucgr.A01538/Eucgr.A02290/Eucgr.B00660/Eucgr.B03480/Eucgr.C00320/Eucgr.C00495/Eucgr.D00343/Eucgr.D01220/Eucgr.D01657/Eucgr.E00189/Eucgr.E00871/Eucgr.E02668/Eucgr.E03445/Eucgr.F01561/Eucgr.F01594/Eucgr.F01647/Eucgr.F01823/Eucgr.F02506/Eucgr.F03473/Eucgr.F03667/Eucgr.F04117/Eucgr.G01905/Eucgr.G02224/Eucgr.G02933/Eucgr.G03076/Eucgr.H00023/Eucgr.H01160/Eucgr.H01…	51
GO:0048193	Golgi vesicle transport	BP	28/1565	79/9326	4.48155e-05	0.00101739	Eucgr.A00473/Eucgr.A02575/Eucgr.B00707/Eucgr.B02594/Eucgr.B03390/Eucgr.C01004/Eucgr.C02306/Eucgr.C02867/Eucgr.D00483/Eucgr.D01026/Eucgr.D02473/Eucgr.D02557/Eucgr.E00370/Eucgr.E02021/Eucgr.F03341/Eucgr.F04242/Eucgr.G00871/Eucgr.G01708/Eucgr.G01711/Eucgr.G01717/Eucgr.G02381/Eucgr.G02726/Eucgr.H03169/Eucgr.H03367/Eucgr.J02845/Eucgr.J03008/Eucgr.K00564/Eucgr.K01948	28
GO:0009628	response to abiotic stimulus	BP	69/1565	262/9326	4.97243e-05	0.00101739	Eucgr.A00257/Eucgr.A00908/Eucgr.A02683/Eucgr.B00015/Eucgr.B00238/Eucgr.B00394/Eucgr.B00628/Eucgr.B01356/Eucgr.B01556/Eucgr.B02180/Eucgr.B02582/Eucgr.B02721/Eucgr.B03436/Eucgr.B03506/Eucgr.B03714/Eucgr.C00480/Eucgr.C00739/Eucgr.C02488/Eucgr.C02815/Eucgr.C02886/Eucgr.C03168/Eucgr.C03820/Eucgr.C04090/Eucgr.C04138/Eucgr.D00642/Eucgr.D01061/Eucgr.E02414/Eucgr.E03208/Eucgr.E03350/Eucgr.F02337/Eucgr.F02…	69
GO:0009648	photoperiodism	BP	10/1565	16/9326	5.17779e-05	0.00101739	Eucgr.B00394/Eucgr.B02721/Eucgr.B03714/Eucgr.D00642/Eucgr.E02414/Eucgr.E03208/Eucgr.F02686/Eucgr.F03613/Eucgr.G02854/Eucgr.K00737	10
GO:0023051	regulation of signaling	BP	38/1565	123/9326	7.41946e-05	0.00136674	Eucgr.A00170/Eucgr.A00803/Eucgr.A00805/Eucgr.A01454/Eucgr.B00222/Eucgr.B01052/Eucgr.B02547/Eucgr.B03056/Eucgr.B03196/Eucgr.C00739/Eucgr.C00756/Eucgr.C01141/Eucgr.C03168/Eucgr.C04019/Eucgr.D00289/Eucgr.D00642/Eucgr.E02497/Eucgr.E03814/Eucgr.F03336/Eucgr.F03415/Eucgr.G00037/Eucgr.G00556/Eucgr.G01779/Eucgr.G02065/Eucgr.G03219/Eucgr.H04382/Eucgr.H04635/Eucgr.I01543/Eucgr.J00522/Eucgr.J02086/Eucgr.J02…	38
GO:0048518	positive regulation of biological process	BP	54/1565	196/9326	9.02507e-05	0.0016017	Eucgr.A00261/Eucgr.A00285/Eucgr.A00803/Eucgr.A00805/Eucgr.A00908/Eucgr.A02887/Eucgr.B00222/Eucgr.B00853/Eucgr.B01052/Eucgr.B01487/Eucgr.B02547/Eucgr.B03154/Eucgr.C00100/Eucgr.C00241/Eucgr.C00739/Eucgr.C00824/Eucgr.C01141/Eucgr.C03168/Eucgr.C04090/Eucgr.C04376/Eucgr.D00052/Eucgr.D00642/Eucgr.D01061/Eucgr.D02427/Eucgr.E00258/Eucgr.E00364/Eucgr.E00577/Eucgr.E03208/Eucgr.E04332/Eucgr.F01177/Eucgr.F01…	54
GO:0009737	response to abscisic acid	BP	34/1565	107/9326	9.41955e-05	0.0016017	Eucgr.A00141/Eucgr.A00257/Eucgr.A00534/Eucgr.A02545/Eucgr.B00015/Eucgr.B00033/Eucgr.B00544/Eucgr.B00660/Eucgr.B03506/Eucgr.B03714/Eucgr.C00739/Eucgr.C03168/Eucgr.C04019/Eucgr.D02473/Eucgr.E00022/Eucgr.E00047/Eucgr.E03350/Eucgr.F02337/Eucgr.F03336/Eucgr.G00556/Eucgr.G03076/Eucgr.G03219/Eucgr.H04632/Eucgr.H04699/Eucgr.I00017/Eucgr.I01070/Eucgr.J00923/Eucgr.J02086/Eucgr.J02432/Eucgr.J02935/Eucgr.K00…	34
GO:0009719	response to endogenous stimulus	BP	76/1565	302/9326	0.00010815	0.00172308	Eucgr.A00141/Eucgr.A00170/Eucgr.A00257/Eucgr.A00534/Eucgr.A02545/Eucgr.B00015/Eucgr.B00033/Eucgr.B00238/Eucgr.B00544/Eucgr.B00660/Eucgr.B02421/Eucgr.B02495/Eucgr.B03506/Eucgr.B03662/Eucgr.B03714/Eucgr.B03812/Eucgr.C00633/Eucgr.C00739/Eucgr.C01007/Eucgr.C02178/Eucgr.C03168/Eucgr.C03293/Eucgr.C04019/Eucgr.C04235/Eucgr.D00264/Eucgr.D00289/Eucgr.D00642/Eucgr.D00716/Eucgr.D02319/Eucgr.D02473/Eucgr.E00…	76
GO:0043085	positive regulation of catalytic activity	BP	31/1565	95/9326	0.000109128	0.00172308	Eucgr.A00035/Eucgr.A00803/Eucgr.A00805/Eucgr.A01700/Eucgr.B00033/Eucgr.B00222/Eucgr.B00701/Eucgr.B01052/Eucgr.B02225/Eucgr.B02547/Eucgr.B03196/Eucgr.B03736/Eucgr.B03826/Eucgr.C00739/Eucgr.C00756/Eucgr.C01141/Eucgr.F00743/Eucgr.F02016/Eucgr.F03415/Eucgr.G00037/Eucgr.G02065/Eucgr.G03244/Eucgr.H03367/Eucgr.H03550/Eucgr.H04206/Eucgr.H04382/Eucgr.H04699/Eucgr.I01475/Eucgr.I01543/Eucgr.K01221/Eucgr.K02…	31
GO:0044093	positive regulation of molecular function	BP	31/1565	95/9326	0.000109128	0.00172308	Eucgr.A00035/Eucgr.A00803/Eucgr.A00805/Eucgr.A01700/Eucgr.B00033/Eucgr.B00222/Eucgr.B00701/Eucgr.B01052/Eucgr.B02225/Eucgr.B02547/Eucgr.B03196/Eucgr.B03736/Eucgr.B03826/Eucgr.C00739/Eucgr.C00756/Eucgr.C01141/Eucgr.F00743/Eucgr.F02016/Eucgr.F03415/Eucgr.G00037/Eucgr.G02065/Eucgr.G03244/Eucgr.H03367/Eucgr.H03550/Eucgr.H04206/Eucgr.H04382/Eucgr.H04699/Eucgr.I01475/Eucgr.I01543/Eucgr.K01221/Eucgr.K02…	31
GO:0019637	organophosphate metabolic process	BP	74/1565	297/9326	0.000185234	0.00272977	Eucgr.A00496/Eucgr.A00534/Eucgr.A00733/Eucgr.A00868/Eucgr.A01374/Eucgr.A01538/Eucgr.A01618/Eucgr.A02290/Eucgr.B00532/Eucgr.B00660/Eucgr.B02421/Eucgr.B02495/Eucgr.B03528/Eucgr.C00739/Eucgr.C03186/Eucgr.D01220/Eucgr.D01306/Eucgr.D01933/Eucgr.E00410/Eucgr.E00871/Eucgr.E01025/Eucgr.E01881/Eucgr.E02668/Eucgr.E03445/Eucgr.E03818/Eucgr.F00711/Eucgr.F01464/Eucgr.F01561/Eucgr.F01594/Eucgr.F01647/Eucgr.F01…	74
GO:0006760	folic acid-containing compound metabolic process	BP	11/1565	21/9326	0.000195576	0.00274493	Eucgr.A00394/Eucgr.A02294/Eucgr.B02610/Eucgr.F01594/Eucgr.F02167/Eucgr.G02823/Eucgr.I00580/Eucgr.I02741/Eucgr.J02122/Eucgr.K00329/Eucgr.K03460	11
GO:0048869	cellular developmental process	BP	37/1565	125/9326	0.000242671	0.00325109	Eucgr.A02887/Eucgr.B00609/Eucgr.B00711/Eucgr.B02504/Eucgr.B03196/Eucgr.B03662/Eucgr.C00100/Eucgr.C00633/Eucgr.C01007/Eucgr.C01715/Eucgr.C02153/Eucgr.C02815/Eucgr.C03799/Eucgr.C04398/Eucgr.D00052/Eucgr.D01840/Eucgr.E00053/Eucgr.E00364/Eucgr.E02475/Eucgr.F01498/Eucgr.F03001/Eucgr.F03069/Eucgr.F03261/Eucgr.F03676/Eucgr.F04205/Eucgr.H03031/Eucgr.H04037/Eucgr.H05054/Eucgr.I01475/Eucgr.I02068/Eucgr.J00…	37
GO:0055086	nucleobase-containing small molecule metabolic process	BP	60/1565	234/9326	0.000329147	0.0041361	Eucgr.A00423/Eucgr.A00534/Eucgr.A00733/Eucgr.A00868/Eucgr.A01374/Eucgr.A01538/Eucgr.B00532/Eucgr.B00660/Eucgr.B02421/Eucgr.B03528/Eucgr.D00343/Eucgr.D01220/Eucgr.E00871/Eucgr.E01025/Eucgr.E02668/Eucgr.E03116/Eucgr.E03319/Eucgr.E03445/Eucgr.F01561/Eucgr.F01594/Eucgr.F01647/Eucgr.F01823/Eucgr.F02260/Eucgr.F02506/Eucgr.F02916/Eucgr.F03307/Eucgr.F03667/Eucgr.F03840/Eucgr.G00660/Eucgr.G00868/Eucgr.G01…	60
GO:0071310	cellular response to organic substance	BP	51/1565	193/9326	0.000421914	0.00466326	Eucgr.A00141/Eucgr.A00170/Eucgr.A00257/Eucgr.A02545/Eucgr.B00341/Eucgr.B00369/Eucgr.B00544/Eucgr.B02495/Eucgr.B03506/Eucgr.B03812/Eucgr.C00739/Eucgr.C02178/Eucgr.C03168/Eucgr.C03293/Eucgr.C04019/Eucgr.D00264/Eucgr.D00289/Eucgr.D00642/Eucgr.D00716/Eucgr.E00022/Eucgr.E00221/Eucgr.E02414/Eucgr.E02497/Eucgr.E03350/Eucgr.E03814/Eucgr.F02337/Eucgr.F03336/Eucgr.G00076/Eucgr.G00556/Eucgr.G01124/Eucgr.G01…	51
GO:0003006	developmental process involved in reproduction	BP	56/1565	219/9326	0.000551483	0.00547896	Eucgr.A00534/Eucgr.A01411/Eucgr.A02139/Eucgr.A02143/Eucgr.A02925/Eucgr.B00238/Eucgr.B00394/Eucgr.B00544/Eucgr.B02532/Eucgr.B03196/Eucgr.B03506/Eucgr.B03714/Eucgr.C00066/Eucgr.C00633/Eucgr.C00739/Eucgr.C00824/Eucgr.C01007/Eucgr.C04030/Eucgr.C04138/Eucgr.D00264/Eucgr.D00642/Eucgr.D01061/Eucgr.D02427/Eucgr.E00053/Eucgr.E00577/Eucgr.E01449/Eucgr.E02414/Eucgr.E03208/Eucgr.F02686/Eucgr.F03336/Eucgr.F03…	56
GO:0046854	phosphatidylinositol phosphorylation	BP	10/1565	20/9326	0.00062356	0.00592859	Eucgr.A01618/Eucgr.C03186/Eucgr.E01881/Eucgr.E03818/Eucgr.F02638/Eucgr.F03343/Eucgr.G00577/Eucgr.G01697/Eucgr.H02571/Eucgr.J02598	10
GO:0023014	signal transduction by protein phosphorylation	BP	24/1565	74/9326	0.000696535	0.00634931	Eucgr.A00803/Eucgr.A00805/Eucgr.A02762/Eucgr.B00222/Eucgr.B00871/Eucgr.B01052/Eucgr.B01356/Eucgr.B02547/Eucgr.B03506/Eucgr.C00012/Eucgr.C01141/Eucgr.C04019/Eucgr.F01598/Eucgr.F03415/Eucgr.G00037/Eucgr.G02065/Eucgr.H04382/Eucgr.H04632/Eucgr.J02086/Eucgr.K00060/Eucgr.K00729/Eucgr.K01221/Eucgr.K02264/Eucgr.K03574	24
GO:0022607	cellular component assembly	BP	67/1565	276/9326	0.00078751	0.00696325	Eucgr.A00190/Eucgr.A00286/Eucgr.A00993/Eucgr.A01050/Eucgr.A02017/Eucgr.A02139/Eucgr.A02344/Eucgr.A02510/Eucgr.A02575/Eucgr.B00173/Eucgr.B00628/Eucgr.B01428/Eucgr.B01599/Eucgr.C00241/Eucgr.C00619/Eucgr.C01715/Eucgr.C02153/Eucgr.C02726/Eucgr.C03194/Eucgr.C03953/Eucgr.C04084/Eucgr.C04131/Eucgr.C04376/Eucgr.D00427/Eucgr.D00655/Eucgr.D01820/Eucgr.D02319/Eucgr.E00053/Eucgr.E01504/Eucgr.E02397/Eucgr.E02…	67
GO:0006732	coenzyme metabolic process	BP	42/1565	156/9326	0.000875587	0.00766538	Eucgr.A00394/Eucgr.A00868/Eucgr.A01538/Eucgr.A02294/Eucgr.B00532/Eucgr.B02421/Eucgr.B02610/Eucgr.B03528/Eucgr.C01875/Eucgr.E01025/Eucgr.E02668/Eucgr.F00711/Eucgr.F01464/Eucgr.F01561/Eucgr.F01594/Eucgr.F01647/Eucgr.F01823/Eucgr.F02167/Eucgr.F02506/Eucgr.F03307/Eucgr.F03840/Eucgr.G00060/Eucgr.G01120/Eucgr.G01905/Eucgr.G02402/Eucgr.G02823/Eucgr.H00086/Eucgr.H03385/Eucgr.I00580/Eucgr.I02741/Eucgr.J00…	42
GO:0050793	regulation of developmental process	BP	33/1565	116/9326	0.00110403	0.00875267	Eucgr.A02017/Eucgr.A02925/Eucgr.B00609/Eucgr.B02582/Eucgr.B03506/Eucgr.C00824/Eucgr.C01428/Eucgr.C02886/Eucgr.C03799/Eucgr.D00642/Eucgr.D01061/Eucgr.D01840/Eucgr.D02427/Eucgr.E00139/Eucgr.E00577/Eucgr.E02414/Eucgr.E03208/Eucgr.F02686/Eucgr.F03069/Eucgr.F04205/Eucgr.G00556/Eucgr.G02854/Eucgr.H03031/Eucgr.H04037/Eucgr.H04418/Eucgr.H04632/Eucgr.H04789/Eucgr.I01475/Eucgr.I02503/Eucgr.J02086/Eucgr.J02…	33
GO:0016049	cell growth	BP	23/1565	72/9326	0.00112778	0.00882471	Eucgr.A00190/Eucgr.B00609/Eucgr.B00628/Eucgr.B00711/Eucgr.B02470/Eucgr.B02478/Eucgr.B03196/Eucgr.C00633/Eucgr.C02815/Eucgr.C04398/Eucgr.D00052/Eucgr.D00310/Eucgr.D00483/Eucgr.F01498/Eucgr.F03001/Eucgr.H00823/Eucgr.I00378/Eucgr.I01475/Eucgr.I02068/Eucgr.I02503/Eucgr.J01392/Eucgr.J02293/Eucgr.K03590	23
GO:0046835	carbohydrate phosphorylation	BP	11/1565	25/9326	0.0012867	0.00973676	Eucgr.A02848/Eucgr.A02851/Eucgr.C02197/Eucgr.F00471/Eucgr.F01647/Eucgr.F01823/Eucgr.H00494/Eucgr.H04065/Eucgr.I01312/Eucgr.J01899/Eucgr.K00768	11
GO:0009396	folic acid-containing compound biosynthetic process	BP	7/1565	9326-12-01	0.00133713	0.00973676	Eucgr.A02294/Eucgr.B02610/Eucgr.F01594/Eucgr.G02823/Eucgr.J02122/Eucgr.K00329/Eucgr.K03460	7
GO:0006486	protein glycosylation	BP	12/1565	29/9326	0.00149879	0.0102732	Eucgr.B03480/Eucgr.D01657/Eucgr.F03473/Eucgr.F04117/Eucgr.G02933/Eucgr.G03076/Eucgr.H01160/Eucgr.I01147/Eucgr.I02739/Eucgr.J02255/Eucgr.J02587/Eucgr.L00584	12
GO:0043413	macromolecule glycosylation	BP	12/1565	29/9326	0.00149879	0.0102732	Eucgr.B03480/Eucgr.D01657/Eucgr.F03473/Eucgr.F04117/Eucgr.G02933/Eucgr.G03076/Eucgr.H01160/Eucgr.I01147/Eucgr.I02739/Eucgr.J02255/Eucgr.J02587/Eucgr.L00584	12
GO:0044087	regulation of cellular component biogenesis	BP	12/1565	29/9326	0.00149879	0.0102732	Eucgr.A01050/Eucgr.A02017/Eucgr.C03194/Eucgr.C04376/Eucgr.D00427/Eucgr.E04332/Eucgr.F01600/Eucgr.G02360/Eucgr.H02768/Eucgr.H02816/Eucgr.I02503/Eucgr.K00914	12
GO:0051254	positive regulation of RNA metabolic process	BP	18/1565	53/9326	0.00175103	0.0119098	Eucgr.A00908/Eucgr.A02887/Eucgr.B01487/Eucgr.B03154/Eucgr.C00824/Eucgr.C04090/Eucgr.D00052/Eucgr.E00364/Eucgr.E03208/Eucgr.F01177/Eucgr.F01600/Eucgr.H03550/Eucgr.H04623/Eucgr.H04783/Eucgr.I02503/Eucgr.J00539/Eucgr.J01999/Eucgr.K02896	18
GO:0009630	gravitropism	BP	9/1565	19/9326	0.00190339	0.0124666	Eucgr.B00238/Eucgr.B01356/Eucgr.C04138/Eucgr.G01779/Eucgr.K01320/Eucgr.K02348/Eucgr.K02431/Eucgr.K02930/Eucgr.L03513	9
GO:0031325	positive regulation of cellular metabolic process	BP	34/1565	125/9326	0.0021623	0.0133667	Eucgr.A00261/Eucgr.A00803/Eucgr.A00805/Eucgr.A00908/Eucgr.A02887/Eucgr.B00222/Eucgr.B01052/Eucgr.B01487/Eucgr.B02547/Eucgr.B03154/Eucgr.C00241/Eucgr.C00824/Eucgr.C01141/Eucgr.C04090/Eucgr.D00052/Eucgr.E00258/Eucgr.E00364/Eucgr.E03208/Eucgr.F01177/Eucgr.F01600/Eucgr.F03415/Eucgr.G00037/Eucgr.G02065/Eucgr.H03550/Eucgr.H04206/Eucgr.H04382/Eucgr.H04623/Eucgr.H04783/Eucgr.I02503/Eucgr.J00539/Eucgr.J01…	34
GO:0010119	regulation of stomatal movement	BP	8/1565	16/9326	0.00222686	0.0133667	Eucgr.C02815/Eucgr.C03168/Eucgr.C04019/Eucgr.J02086/Eucgr.K00737/Eucgr.K01029/Eucgr.K01030/Eucgr.K01031	8
GO:0023057	negative regulation of signaling	BP	8/1565	16/9326	0.00222686	0.0133667	Eucgr.C00739/Eucgr.C03168/Eucgr.C04019/Eucgr.G00556/Eucgr.G03219/Eucgr.J02086/Eucgr.K00729/Eucgr.K02568	8
GO:0006606	protein import into nucleus	BP	13/1565	34/9326	0.002266	0.0133667	Eucgr.A00600/Eucgr.D02427/Eucgr.F03709/Eucgr.F04480/Eucgr.G01904/Eucgr.G02106/Eucgr.H04107/Eucgr.I02730/Eucgr.J01771/Eucgr.J02948/Eucgr.K01721/Eucgr.K02007/Eucgr.K03215	13
GO:0051321	meiotic cell cycle	BP	13/1565	34/9326	0.002266	0.0133667	Eucgr.A01177/Eucgr.E00349/Eucgr.E00409/Eucgr.F01076/Eucgr.H00025/Eucgr.H02748/Eucgr.H02905/Eucgr.I00435/Eucgr.J00539/Eucgr.J00844/Eucgr.J01370/Eucgr.K00248/Eucgr.K01213	13
GO:0040007	growth	BP	28/1565	98/9326	0.00236848	0.0133667	Eucgr.A00190/Eucgr.B00609/Eucgr.B00628/Eucgr.B00711/Eucgr.B02470/Eucgr.B02478/Eucgr.B03196/Eucgr.B03506/Eucgr.C00633/Eucgr.C02815/Eucgr.C04398/Eucgr.D00052/Eucgr.D00310/Eucgr.D00483/Eucgr.F01498/Eucgr.F03001/Eucgr.G03219/Eucgr.H00823/Eucgr.H04632/Eucgr.I00378/Eucgr.I01475/Eucgr.I02068/Eucgr.I02503/Eucgr.J00923/Eucgr.J01392/Eucgr.J02293/Eucgr.K01213/Eucgr.K03590	28
GO:0070647	protein modification by small protein conjugation or removal	BP	46/1565	183/9326	0.00239252	0.0133667	Eucgr.A00261/Eucgr.A02560/Eucgr.A02915/Eucgr.B00369/Eucgr.B00398/Eucgr.B02466/Eucgr.B02470/Eucgr.B02478/Eucgr.B03056/Eucgr.B03561/Eucgr.B03800/Eucgr.C01428/Eucgr.C01723/Eucgr.C01814/Eucgr.E00216/Eucgr.E00258/Eucgr.E02414/Eucgr.F00711/Eucgr.F02042/Eucgr.F03261/Eucgr.F03540/Eucgr.G00074/Eucgr.G01986/Eucgr.G02663/Eucgr.G02967/Eucgr.G03219/Eucgr.H02615/Eucgr.H03185/Eucgr.H03283/Eucgr.H04635/Eucgr.H04…	46
GO:1905037	autophagosome organization	BP	7/1565	13/9326	0.00247921	0.0133667	Eucgr.A02575/Eucgr.B00173/Eucgr.C00241/Eucgr.E01504/Eucgr.I01159/Eucgr.J00097/Eucgr.K03157	7
GO:1905957	regulation of cellular response to alcohol	BP	7/1565	13/9326	0.00247921	0.0133667	Eucgr.C00739/Eucgr.C03168/Eucgr.C04019/Eucgr.F03336/Eucgr.G00556/Eucgr.G03219/Eucgr.J02935	7
GO:0044085	cellular component biogenesis	BP	98/1565	450/9326	0.00286821	0.0149182	Eucgr.A00190/Eucgr.A00286/Eucgr.A00993/Eucgr.A01050/Eucgr.A01411/Eucgr.A02017/Eucgr.A02139/Eucgr.A02344/Eucgr.A02507/Eucgr.A02510/Eucgr.A02575/Eucgr.B00173/Eucgr.B00382/Eucgr.B00628/Eucgr.B01028/Eucgr.B01360/Eucgr.B01428/Eucgr.B01599/Eucgr.B03662/Eucgr.B03848/Eucgr.B03850/Eucgr.C00241/Eucgr.C00619/Eucgr.C01159/Eucgr.C01715/Eucgr.C02153/Eucgr.C02168/Eucgr.C02726/Eucgr.C03194/Eucgr.C03953/Eucgr.C04…	98
GO:0009101	glycoprotein biosynthetic process	BP	12/1565	31/9326	0.00294025	0.0151679	Eucgr.B03480/Eucgr.D01657/Eucgr.F03473/Eucgr.F04117/Eucgr.G02933/Eucgr.G03076/Eucgr.H01160/Eucgr.I01147/Eucgr.I02739/Eucgr.J02255/Eucgr.J02587/Eucgr.L00584	12
GO:0006090	pyruvate metabolic process	BP	16/1565	47/9326	0.00301333	0.0154013	Eucgr.A00868/Eucgr.A01538/Eucgr.B02495/Eucgr.F01561/Eucgr.F01647/Eucgr.F01823/Eucgr.F02506/Eucgr.F03161/Eucgr.H03385/Eucgr.H03642/Eucgr.J00008/Eucgr.J00327/Eucgr.J01749/Eucgr.J01952/Eucgr.K00768/Eucgr.K02073	16
GO:0140013	meiotic nuclear division	BP	11/1565	28/9326	0.00381078	0.0183353	Eucgr.A01177/Eucgr.E00349/Eucgr.E00409/Eucgr.H00025/Eucgr.H02748/Eucgr.H02905/Eucgr.I00435/Eucgr.J00844/Eucgr.J01370/Eucgr.K00248/Eucgr.K01213	11
GO:0016236	macroautophagy	BP	7/1565	14/9326	0.00424538	0.0193595	Eucgr.A02575/Eucgr.B00173/Eucgr.C00241/Eucgr.E01504/Eucgr.I01159/Eucgr.J00097/Eucgr.K03157	7
GO:0043254	regulation of protein complex assembly	BP	9/1565	21/9326	0.00440392	0.0198673	Eucgr.A01050/Eucgr.A02017/Eucgr.C04376/Eucgr.E04332/Eucgr.F01600/Eucgr.G02360/Eucgr.H02768/Eucgr.H02816/Eucgr.K00914	9
GO:0044270	cellular nitrogen compound catabolic process	BP	30/1565	112/9326	0.00487352	0.0215461	Eucgr.A00423/Eucgr.A00868/Eucgr.A00993/Eucgr.A01538/Eucgr.A02083/Eucgr.B02279/Eucgr.B03469/Eucgr.B03506/Eucgr.B03826/Eucgr.C00066/Eucgr.D00696/Eucgr.E03116/Eucgr.E03319/Eucgr.F01561/Eucgr.F01647/Eucgr.F01823/Eucgr.F03766/Eucgr.G00868/Eucgr.G02360/Eucgr.H01340/Eucgr.H04632/Eucgr.I01219/Eucgr.J00008/Eucgr.J00327/Eucgr.J00610/Eucgr.J01749/Eucgr.J01952/Eucgr.J01999/Eucgr.K00768/Eucgr.K02073	30
GO:0043414	macromolecule methylation	BP	21/1565	72/9326	0.00608722	0.0256304	Eucgr.A02133/Eucgr.B02615/Eucgr.C00824/Eucgr.C01077/Eucgr.D01689/Eucgr.D02075/Eucgr.D02616/Eucgr.F02912/Eucgr.F03851/Eucgr.H01928/Eucgr.H04746/Eucgr.I00532/Eucgr.I01063/Eucgr.J00005/Eucgr.J00094/Eucgr.J00342/Eucgr.J01408/Eucgr.J02331/Eucgr.J03135/Eucgr.K02777/Eucgr.K02994	21
GO:0043933	protein-containing complex subunit organization	BP	50/1565	212/9326	0.00630584	0.0263982	Eucgr.A00286/Eucgr.A00993/Eucgr.A01050/Eucgr.A02017/Eucgr.A02139/Eucgr.A02510/Eucgr.B01428/Eucgr.B01462/Eucgr.B01599/Eucgr.C00619/Eucgr.C04084/Eucgr.C04218/Eucgr.C04376/Eucgr.D01820/Eucgr.D02319/Eucgr.E02397/Eucgr.E02475/Eucgr.E04332/Eucgr.F01600/Eucgr.F03008/Eucgr.F03965/Eucgr.F04242/Eucgr.G00004/Eucgr.G00074/Eucgr.G02350/Eucgr.G02360/Eucgr.G02685/Eucgr.G03266/Eucgr.H00823/Eucgr.H01111/Eucgr.H02…	50
GO:0042398	cellular modified amino acid biosynthetic process	BP	7/1565	15/9326	0.00681907	0.0272828	Eucgr.A02294/Eucgr.B02610/Eucgr.F01594/Eucgr.G02823/Eucgr.J02122/Eucgr.K00329/Eucgr.K03460	7
GO:0042559	pteridine-containing compound biosynthetic process	BP	7/1565	15/9326	0.00681907	0.0272828	Eucgr.A02294/Eucgr.B02610/Eucgr.F01594/Eucgr.G02823/Eucgr.J02122/Eucgr.K00329/Eucgr.K03460	7
GO:0071902	positive regulation of protein serine/threonine kinase activity	BP	12/1565	34/9326	0.00701536	0.0278164	Eucgr.A00803/Eucgr.A00805/Eucgr.B00222/Eucgr.B01052/Eucgr.B02547/Eucgr.C01141/Eucgr.F03415/Eucgr.G00037/Eucgr.G02065/Eucgr.H03550/Eucgr.H04382/Eucgr.K01221	12
GO:0051239	regulation of multicellular organismal process	BP	23/1565	82/9326	0.00709416	0.0280032	Eucgr.A02017/Eucgr.A02925/Eucgr.B02582/Eucgr.B03506/Eucgr.C00824/Eucgr.C01428/Eucgr.C02886/Eucgr.D00642/Eucgr.D01061/Eucgr.D02427/Eucgr.E00139/Eucgr.E00577/Eucgr.E02414/Eucgr.E03208/Eucgr.F02686/Eucgr.G00556/Eucgr.G02854/Eucgr.H04418/Eucgr.H04632/Eucgr.H04789/Eucgr.I01475/Eucgr.I02503/Eucgr.J02086	23
GO:0001101	response to acid chemical	BP	46/1565	194/9326	0.00772703	0.0301365	Eucgr.A00141/Eucgr.A00170/Eucgr.A00257/Eucgr.A00534/Eucgr.A02545/Eucgr.B00015/Eucgr.B00033/Eucgr.B00544/Eucgr.B00660/Eucgr.B02495/Eucgr.B03506/Eucgr.B03714/Eucgr.C00739/Eucgr.C02815/Eucgr.C03168/Eucgr.C04019/Eucgr.D00289/Eucgr.D00642/Eucgr.D02473/Eucgr.E00022/Eucgr.E00047/Eucgr.E02497/Eucgr.E03208/Eucgr.E03350/Eucgr.E03814/Eucgr.F02337/Eucgr.F03336/Eucgr.G00556/Eucgr.G01124/Eucgr.G03076/Eucgr.G03…	46
GO:0022411	cellular component disassembly	BP	10/1565	27/9326	0.00924179	0.0339868	Eucgr.B01462/Eucgr.G00004/Eucgr.G02350/Eucgr.H00823/Eucgr.I01159/Eucgr.I01561/Eucgr.I01663/Eucgr.J00097/Eucgr.K03157/Eucgr.K03590	10
GO:0004386	helicase activity	MF	52/1805	130/10610	3.60207e-10	1.55837e-07	Eucgr.A00214/Eucgr.A01177/Eucgr.B00242/Eucgr.B00583/Eucgr.B01028/Eucgr.B01360/Eucgr.B02279/Eucgr.B03621/Eucgr.C00066/Eucgr.C00406/Eucgr.C02886/Eucgr.D00002/Eucgr.D01365/Eucgr.D01628/Eucgr.D02270/Eucgr.D02305/Eucgr.D02653/Eucgr.E00064/Eucgr.E00567/Eucgr.E00638/Eucgr.E02391/Eucgr.F01600/Eucgr.F03013/Eucgr.F03572/Eucgr.F03979/Eucgr.G00345/Eucgr.G00556/Eucgr.G00562/Eucgr.G02228/Eucgr.G02569/Eucgr.G02…	52
GO:0140097	catalytic activity, acting on DNA	MF	45/1805	122/10610	9.92458e-08	1.69167e-05	Eucgr.A01754/Eucgr.A02236/Eucgr.B00242/Eucgr.B01945/Eucgr.B02615/Eucgr.B03662/Eucgr.B03882/Eucgr.C02886/Eucgr.C03174/Eucgr.D00002/Eucgr.D00367/Eucgr.D00435/Eucgr.D01139/Eucgr.D01628/Eucgr.D02616/Eucgr.E00349/Eucgr.E00638/Eucgr.E02391/Eucgr.F01600/Eucgr.F03013/Eucgr.F03572/Eucgr.F04135/Eucgr.G00562/Eucgr.G02569/Eucgr.H00025/Eucgr.H01043/Eucgr.H01157/Eucgr.H01340/Eucgr.H01686/Eucgr.H02748/Eucgr.H04…	45
GO:0003723	RNA binding	MF	112/1805	414/10610	1.17305e-07	1.69167e-05	Eucgr.A00093/Eucgr.A00286/Eucgr.A00608/Eucgr.A00913/Eucgr.A01322/Eucgr.A01411/Eucgr.A01591/Eucgr.A02139/Eucgr.A02371/Eucgr.A02507/Eucgr.A02510/Eucgr.B00129/Eucgr.B00614/Eucgr.B01310/Eucgr.B01418/Eucgr.B01428/Eucgr.B01462/Eucgr.B01599/Eucgr.B02279/Eucgr.B02314/Eucgr.B02454/Eucgr.B02495/Eucgr.B02912/Eucgr.B03594/Eucgr.B03714/Eucgr.B03826/Eucgr.B03850/Eucgr.B04011/Eucgr.C00066/Eucgr.C00155/Eucgr.C00…	112
GO:0140098	catalytic activity, acting on RNA	MF	68/1805	233/10610	2.24891e-06	0.000243237	Eucgr.A00214/Eucgr.A00956/Eucgr.A01054/Eucgr.A02322/Eucgr.A02496/Eucgr.B01028/Eucgr.B01310/Eucgr.B01360/Eucgr.B01555/Eucgr.B01628/Eucgr.B02279/Eucgr.B02467/Eucgr.B03621/Eucgr.C00066/Eucgr.C00069/Eucgr.C00406/Eucgr.C01077/Eucgr.C02511/Eucgr.C03173/Eucgr.C04030/Eucgr.D00282/Eucgr.D01365/Eucgr.D01689/Eucgr.D01929/Eucgr.D02586/Eucgr.D02653/Eucgr.E00064/Eucgr.E00567/Eucgr.E01106/Eucgr.E01577/Eucgr.E03…	68
GO:0051020	GTPase binding	MF	19/1805	43/10610	2.78062e-05	0.00215589	Eucgr.A00035/Eucgr.A00473/Eucgr.A00543/Eucgr.A00600/Eucgr.A02966/Eucgr.B00701/Eucgr.B03196/Eucgr.C00756/Eucgr.F03709/Eucgr.G01904/Eucgr.G03244/Eucgr.H03367/Eucgr.H04107/Eucgr.H04230/Eucgr.I01475/Eucgr.I01543/Eucgr.I02730/Eucgr.J01771/Eucgr.K02348	19
GO:0042802	identical protein binding	MF	24/1805	65/10610	9.22909e-05	0.00499099	Eucgr.A02887/Eucgr.B00015/Eucgr.B01356/Eucgr.B03196/Eucgr.B03662/Eucgr.C02815/Eucgr.D01044/Eucgr.D02251/Eucgr.E01713/Eucgr.E02954/Eucgr.F00651/Eucgr.F03510/Eucgr.F04303/Eucgr.F04428/Eucgr.G01732/Eucgr.G02360/Eucgr.G02967/Eucgr.I02503/Eucgr.I02694/Eucgr.J02086/Eucgr.J02838/Eucgr.K00727/Eucgr.K00737/Eucgr.K03574	24
GO:0004519	endonuclease activity	MF	25/1805	70/10610	0.000124104	0.00596569	Eucgr.A02087/Eucgr.A02322/Eucgr.A02496/Eucgr.C00406/Eucgr.C03173/Eucgr.C04030/Eucgr.D00696/Eucgr.D01139/Eucgr.D02586/Eucgr.D02653/Eucgr.E00349/Eucgr.F01076/Eucgr.F03545/Eucgr.H00025/Eucgr.H01340/Eucgr.H04678/Eucgr.I00435/Eucgr.I01829/Eucgr.I01834/Eucgr.J00844/Eucgr.J01260/Eucgr.J02950/Eucgr.K00458/Eucgr.K01860/Eucgr.K02481	25
GO:0016874	ligase activity	MF	63/1805	243/10610	0.000256506	0.008551	Eucgr.A00261/Eucgr.A00643/Eucgr.A00956/Eucgr.A01178/Eucgr.A01456/Eucgr.A02294/Eucgr.B00369/Eucgr.B01310/Eucgr.B01425/Eucgr.B01628/Eucgr.B02467/Eucgr.B02478/Eucgr.B02610/Eucgr.B03943/Eucgr.C01033/Eucgr.C01814/Eucgr.D01517/Eucgr.D01840/Eucgr.D02624/Eucgr.E00577/Eucgr.E01025/Eucgr.E01106/Eucgr.E03926/Eucgr.F00711/Eucgr.F02042/Eucgr.F02880/Eucgr.F03261/Eucgr.F04354/Eucgr.F04382/Eucgr.F04425/Eucgr.G01…	63
GO:0008565	protein transporter activity	MF	18/1805	46/10610	0.000296476	0.008551	Eucgr.A00001/Eucgr.A00543/Eucgr.A00600/Eucgr.A00607/Eucgr.B00583/Eucgr.B03952/Eucgr.C00951/Eucgr.C01579/Eucgr.F03709/Eucgr.G01904/Eucgr.H04107/Eucgr.I02730/Eucgr.J00415/Eucgr.J01771/Eucgr.K00283/Eucgr.K00411/Eucgr.K02232/Eucgr.K03215	18
GO:0017056	structural constituent of nuclear pore	MF	7/1805	11/10610	0.000711014	0.0181307	Eucgr.C04218/Eucgr.G02106/Eucgr.H04658/Eucgr.J02316/Eucgr.K01721/Eucgr.K02007/Eucgr.K02306	7
GO:0003697	single-stranded DNA binding	MF	9/1805	17/10610	0.000766765	0.0181307	Eucgr.B00672/Eucgr.D01628/Eucgr.E00349/Eucgr.H00025/Eucgr.I00435/Eucgr.I01829/Eucgr.J00844/Eucgr.J01999/Eucgr.J02948	9
GO:0016779	nucleotidyltransferase activity	MF	38/1805	136/10610	0.000933703	0.0192357	Eucgr.A01054/Eucgr.B01945/Eucgr.B02538/Eucgr.B03882/Eucgr.C00069/Eucgr.C02511/Eucgr.C02886/Eucgr.D00343/Eucgr.D00435/Eucgr.D01929/Eucgr.D02494/Eucgr.E01577/Eucgr.E03441/Eucgr.E03445/Eucgr.E03926/Eucgr.F00711/Eucgr.F01119/Eucgr.F02088/Eucgr.F03540/Eucgr.F04135/Eucgr.G00853/Eucgr.G01370/Eucgr.G02092/Eucgr.H00421/Eucgr.H01686/Eucgr.I02304/Eucgr.I02582/Eucgr.J00183/Eucgr.J00614/Eucgr.J01182/Eucgr.J01…	38
GO:0008094	DNA-dependent ATPase activity	MF	15/1805	40/10610	0.00155516	0.0292527	Eucgr.A01177/Eucgr.A02236/Eucgr.B03662/Eucgr.D00435/Eucgr.D01139/Eucgr.D02305/Eucgr.E00638/Eucgr.F03013/Eucgr.F03572/Eucgr.G00562/Eucgr.H00025/Eucgr.H02748/Eucgr.I00435/Eucgr.J00591/Eucgr.J00844	15
GO:0140101	catalytic activity, acting on a tRNA	MF	22/1805	71/10610	0.00266235	0.0418154	Eucgr.A00956/Eucgr.A02322/Eucgr.B01310/Eucgr.B01628/Eucgr.C01077/Eucgr.D02586/Eucgr.E01106/Eucgr.F03545/Eucgr.F04425/Eucgr.G01975/Eucgr.H00023/Eucgr.H00404/Eucgr.H04746/Eucgr.H05005/Eucgr.I00532/Eucgr.I01063/Eucgr.J00005/Eucgr.J00041/Eucgr.J00690/Eucgr.J00856/Eucgr.J01408/Eucgr.K02994	22
GO:0016881	acid-amino acid ligase activity	MF	7/1805	13/10610	0.00269341	0.0418154	Eucgr.A00643/Eucgr.A02294/Eucgr.D01840/Eucgr.F04382/Eucgr.J00270/Eucgr.J02122/Eucgr.K00329	7
GO:0044428	nuclear part	CC	125/1483	400/8542	2.42248e-12	3.92697e-10	Eucgr.A00286/Eucgr.A00543/Eucgr.A00600/Eucgr.A01374/Eucgr.A01411/Eucgr.A01754/Eucgr.A02139/Eucgr.A02322/Eucgr.A02507/Eucgr.B00394/Eucgr.B00544/Eucgr.B00704/Eucgr.B00853/Eucgr.B01356/Eucgr.B01428/Eucgr.B01452/Eucgr.B01555/Eucgr.B01556/Eucgr.B02119/Eucgr.B02434/Eucgr.B02596/Eucgr.B03154/Eucgr.B03381/Eucgr.B03561/Eucgr.B03882/Eucgr.B04011/Eucgr.C00066/Eucgr.C00069/Eucgr.C00155/Eucgr.C00824/Eucgr.C01…	125
GO:0031974	membrane-enclosed lumen	CC	96/1483	322/8542	1.4476e-08	4.69327e-07	Eucgr.A00600/Eucgr.A00913/Eucgr.A01374/Eucgr.A01411/Eucgr.A01754/Eucgr.A02139/Eucgr.A02507/Eucgr.B00704/Eucgr.B00853/Eucgr.B01112/Eucgr.B01356/Eucgr.B01452/Eucgr.B01556/Eucgr.B02119/Eucgr.B02434/Eucgr.B02596/Eucgr.B03154/Eucgr.B03381/Eucgr.B03561/Eucgr.B03882/Eucgr.C00066/Eucgr.C00069/Eucgr.C00480/Eucgr.C00824/Eucgr.C01077/Eucgr.C01159/Eucgr.C01716/Eucgr.C02521/Eucgr.C03068/Eucgr.C03174/Eucgr.D00…	96
GO:0043233	organelle lumen	CC	96/1483	322/8542	1.4476e-08	4.69327e-07	Eucgr.A00600/Eucgr.A00913/Eucgr.A01374/Eucgr.A01411/Eucgr.A01754/Eucgr.A02139/Eucgr.A02507/Eucgr.B00704/Eucgr.B00853/Eucgr.B01112/Eucgr.B01356/Eucgr.B01452/Eucgr.B01556/Eucgr.B02119/Eucgr.B02434/Eucgr.B02596/Eucgr.B03154/Eucgr.B03381/Eucgr.B03561/Eucgr.B03882/Eucgr.C00066/Eucgr.C00069/Eucgr.C00480/Eucgr.C00824/Eucgr.C01077/Eucgr.C01159/Eucgr.C01716/Eucgr.C02521/Eucgr.C03068/Eucgr.C03174/Eucgr.D00…	96
GO:0098588	bounding membrane of organelle	CC	83/1483	282/8542	2.59924e-07	7.02252e-06	Eucgr.A00534/Eucgr.A01050/Eucgr.A01129/Eucgr.A02017/Eucgr.A02776/Eucgr.A02778/Eucgr.B00015/Eucgr.B00173/Eucgr.B00317/Eucgr.B00481/Eucgr.B00707/Eucgr.B00717/Eucgr.B00855/Eucgr.B01990/Eucgr.B02594/Eucgr.B02887/Eucgr.B03069/Eucgr.B03154/Eucgr.B03390/Eucgr.C00132/Eucgr.C00739/Eucgr.C01004/Eucgr.C01277/Eucgr.C02867/Eucgr.C04138/Eucgr.D00483/Eucgr.D01026/Eucgr.D01430/Eucgr.D01657/Eucgr.D01835/Eucgr.D02…	83
GO:0031410	cytoplasmic vesicle	CC	52/1483	157/8542	1.02126e-06	1.65552e-05	Eucgr.A00257/Eucgr.A00913/Eucgr.A01050/Eucgr.A02017/Eucgr.A02575/Eucgr.A02776/Eucgr.B00481/Eucgr.B00701/Eucgr.B00707/Eucgr.B00711/Eucgr.B02594/Eucgr.B03053/Eucgr.B03196/Eucgr.B04005/Eucgr.C02726/Eucgr.C04138/Eucgr.C04398/Eucgr.D00196/Eucgr.D00483/Eucgr.D01026/Eucgr.D01835/Eucgr.D02301/Eucgr.D02473/Eucgr.E01240/Eucgr.F01568/Eucgr.F02737/Eucgr.F03341/Eucgr.F03682/Eucgr.F04117/Eucgr.G00444/Eucgr.G01…	52
GO:0097708	intracellular vesicle	CC	52/1483	157/8542	1.02126e-06	1.65552e-05	Eucgr.A00257/Eucgr.A00913/Eucgr.A01050/Eucgr.A02017/Eucgr.A02575/Eucgr.A02776/Eucgr.B00481/Eucgr.B00701/Eucgr.B00707/Eucgr.B00711/Eucgr.B02594/Eucgr.B03053/Eucgr.B03196/Eucgr.B04005/Eucgr.C02726/Eucgr.C04138/Eucgr.C04398/Eucgr.D00196/Eucgr.D00483/Eucgr.D01026/Eucgr.D01835/Eucgr.D02301/Eucgr.D02473/Eucgr.E01240/Eucgr.F01568/Eucgr.F02737/Eucgr.F03341/Eucgr.F03682/Eucgr.F04117/Eucgr.G00444/Eucgr.G01…	52
GO:0031982	vesicle	CC	52/1483	158/8542	1.27048e-06	1.71178e-05	Eucgr.A00257/Eucgr.A00913/Eucgr.A01050/Eucgr.A02017/Eucgr.A02575/Eucgr.A02776/Eucgr.B00481/Eucgr.B00701/Eucgr.B00707/Eucgr.B00711/Eucgr.B02594/Eucgr.B03053/Eucgr.B03196/Eucgr.B04005/Eucgr.C02726/Eucgr.C04138/Eucgr.C04398/Eucgr.D00196/Eucgr.D00483/Eucgr.D01026/Eucgr.D01835/Eucgr.D02301/Eucgr.D02473/Eucgr.E01240/Eucgr.F01568/Eucgr.F02737/Eucgr.F03341/Eucgr.F03682/Eucgr.F04117/Eucgr.G00444/Eucgr.G01…	52
GO:0030117	membrane coat	CC	18/1483	33/8542	1.37276e-06	1.71178e-05	Eucgr.B02594/Eucgr.B03952/Eucgr.C01579/Eucgr.D00483/Eucgr.D01026/Eucgr.F03011/Eucgr.F03442/Eucgr.G00444/Eucgr.G01708/Eucgr.G01711/Eucgr.G01717/Eucgr.G03075/Eucgr.H03169/Eucgr.J00193/Eucgr.J00415/Eucgr.J03008/Eucgr.K00564/Eucgr.K02232	18
GO:0048475	coated membrane	CC	18/1483	33/8542	1.37276e-06	1.71178e-05	Eucgr.B02594/Eucgr.B03952/Eucgr.C01579/Eucgr.D00483/Eucgr.D01026/Eucgr.F03011/Eucgr.F03442/Eucgr.G00444/Eucgr.G01708/Eucgr.G01711/Eucgr.G01717/Eucgr.G03075/Eucgr.H03169/Eucgr.J00193/Eucgr.J00415/Eucgr.J03008/Eucgr.K00564/Eucgr.K02232	18
GO:0098805	whole membrane	CC	66/1483	229/8542	9.5294e-06	8.13035e-05	Eucgr.A00534/Eucgr.A01050/Eucgr.A01129/Eucgr.A02017/Eucgr.A02776/Eucgr.A02778/Eucgr.B00015/Eucgr.B00173/Eucgr.B00317/Eucgr.B00481/Eucgr.B00717/Eucgr.B00855/Eucgr.B01990/Eucgr.B02594/Eucgr.B03154/Eucgr.C00132/Eucgr.C00241/Eucgr.C00739/Eucgr.C01277/Eucgr.C04138/Eucgr.D00483/Eucgr.D01026/Eucgr.D01430/Eucgr.D01835/Eucgr.D02156/Eucgr.D02301/Eucgr.E00053/Eucgr.E00189/Eucgr.E01240/Eucgr.E02009/Eucgr.E03…	66
GO:1902494	catalytic complex	CC	86/1483	327/8542	2.37618e-05	0.000175716	Eucgr.A00016/Eucgr.A00261/Eucgr.A02290/Eucgr.A02322/Eucgr.B00544/Eucgr.B00704/Eucgr.B00853/Eucgr.B01425/Eucgr.B01476/Eucgr.B01556/Eucgr.B01945/Eucgr.B02434/Eucgr.B03381/Eucgr.B03640/Eucgr.B03772/Eucgr.B03882/Eucgr.C00069/Eucgr.C00155/Eucgr.C00241/Eucgr.C00824/Eucgr.C01428/Eucgr.C01723/Eucgr.C02521/Eucgr.C03168/Eucgr.C04084/Eucgr.D00282/Eucgr.D00435/Eucgr.D02586/Eucgr.E00258/Eucgr.E02414/Eucgr.E03…	86
GO:1990234	transferase complex	CC	52/1483	173/8542	2.38472e-05	0.000175716	Eucgr.A00261/Eucgr.A02290/Eucgr.B00544/Eucgr.B00704/Eucgr.B01556/Eucgr.B01945/Eucgr.B03640/Eucgr.B03882/Eucgr.C00069/Eucgr.C00241/Eucgr.C00824/Eucgr.C01428/Eucgr.C01723/Eucgr.C02521/Eucgr.D00435/Eucgr.E00258/Eucgr.E02414/Eucgr.E03441/Eucgr.F02088/Eucgr.F02266/Eucgr.F02895/Eucgr.F03261/Eucgr.G01370/Eucgr.G02107/Eucgr.G02836/Eucgr.G03070/Eucgr.H00421/Eucgr.H01686/Eucgr.H02571/Eucgr.H03550/Eucgr.H03…	52
GO:0005694	chromosome	CC	39/1483	130/8542	0.000251323	0.00145503	Eucgr.A01107/Eucgr.A01754/Eucgr.A02236/Eucgr.A02895/Eucgr.B00704/Eucgr.B01452/Eucgr.B01550/Eucgr.B02434/Eucgr.B03381/Eucgr.B03561/Eucgr.B03882/Eucgr.C03174/Eucgr.D00435/Eucgr.D01236/Eucgr.E00409/Eucgr.F01076/Eucgr.F03008/Eucgr.G00562/Eucgr.G01927/Eucgr.H00025/Eucgr.H00037/Eucgr.H01686/Eucgr.H01928/Eucgr.H02905/Eucgr.H03855/Eucgr.H04558/Eucgr.H04963/Eucgr.I00435/Eucgr.I01053/Eucgr.I01572/Eucgr.I01…	39
GO:0042175	nuclear outer membrane-endoplasmic reticulum membrane network	CC	32/1483	110/8542	0.0015388	0.00593922	Eucgr.A00001/Eucgr.A00285/Eucgr.A02290/Eucgr.A02776/Eucgr.A02967/Eucgr.B00238/Eucgr.B01001/Eucgr.B03069/Eucgr.B03154/Eucgr.B03480/Eucgr.C00633/Eucgr.C00745/Eucgr.C03168/Eucgr.D00052/Eucgr.D01835/Eucgr.D02301/Eucgr.D02473/Eucgr.E00370/Eucgr.F03682/Eucgr.G01979/Eucgr.G02477/Eucgr.G02933/Eucgr.G03076/Eucgr.H02550/Eucgr.H02617/Eucgr.J00522/Eucgr.J02078/Eucgr.J02086/Eucgr.K00091/Eucgr.K01672/Eucgr.K01…	32
GO:0098562	cytoplasmic side of membrane	CC	7/1483	8542-12-01	0.00164668	0.00620779	Eucgr.A02776/Eucgr.B01476/Eucgr.C03168/Eucgr.D01835/Eucgr.D02301/Eucgr.H02617/Eucgr.I02026	7
GO:0019898	extrinsic component of membrane	CC	15/1483	41/8542	0.00253728	0.00839402	Eucgr.B01476/Eucgr.B04005/Eucgr.C00100/Eucgr.C03168/Eucgr.D01986/Eucgr.E01352/Eucgr.G02107/Eucgr.G02908/Eucgr.H00086/Eucgr.H02571/Eucgr.I01159/Eucgr.I02026/Eucgr.J00097/Eucgr.K00929/Eucgr.K02348	15
GO:0031975	envelope	CC	76/1483	327/8542	0.00345767	0.0101909	Eucgr.A00534/Eucgr.A00543/Eucgr.A00600/Eucgr.A00607/Eucgr.A00911/Eucgr.A00993/Eucgr.A02836/Eucgr.B00021/Eucgr.B01556/Eucgr.B01990/Eucgr.B02421/Eucgr.B02495/Eucgr.B02532/Eucgr.B02721/Eucgr.B03367/Eucgr.C00132/Eucgr.C00142/Eucgr.C00667/Eucgr.C02103/Eucgr.C04218/Eucgr.C04235/Eucgr.D00185/Eucgr.D02319/Eucgr.E00189/Eucgr.E01449/Eucgr.E02954/Eucgr.E03356/Eucgr.F00477/Eucgr.F02948/Eucgr.F03709/Eucgr.F04…	76
GO:0005938	cell cortex	CC	11/1483	27/8542	0.00358335	0.0101909	Eucgr.A00473/Eucgr.D00655/Eucgr.E02482/Eucgr.F02315/Eucgr.F04242/Eucgr.G02511/Eucgr.G03261/Eucgr.H00823/Eucgr.J00280/Eucgr.K02187/Eucgr.K03590	11
GO:0099568	cytoplasmic region	CC	11/1483	27/8542	0.00358335	0.0101909	Eucgr.A00473/Eucgr.D00655/Eucgr.E02482/Eucgr.F02315/Eucgr.F04242/Eucgr.G02511/Eucgr.G03261/Eucgr.H00823/Eucgr.J00280/Eucgr.K02187/Eucgr.K03590	11
GO:1990904	ribonucleoprotein complex	CC	70/1483	304/8542	0.00617184	0.0156326	Eucgr.A00214/Eucgr.A00286/Eucgr.A00608/Eucgr.A00913/Eucgr.A01406/Eucgr.A01411/Eucgr.A02083/Eucgr.A02139/Eucgr.A02371/Eucgr.A02507/Eucgr.A02510/Eucgr.A02778/Eucgr.A02903/Eucgr.B00214/Eucgr.B00394/Eucgr.B00853/Eucgr.B01428/Eucgr.B01555/Eucgr.B01908/Eucgr.B02532/Eucgr.B02912/Eucgr.B03662/Eucgr.B03826/Eucgr.B03850/Eucgr.B04011/Eucgr.C00155/Eucgr.C00406/Eucgr.C01159/Eucgr.C02168/Eucgr.C02263/Eucgr.C04…	70
GO:0000428	DNA-directed RNA polymerase complex	CC	15/1483	46/8542	0.00869946	0.0195865	Eucgr.C00069/Eucgr.C00824/Eucgr.C02521/Eucgr.E03441/Eucgr.F02088/Eucgr.F02266/Eucgr.G01370/Eucgr.H00421/Eucgr.H01686/Eucgr.I02304/Eucgr.J01182/Eucgr.J01999/Eucgr.J02029/Eucgr.K00171/Eucgr.K01811	15
GO:0030880	RNA polymerase complex	CC	15/1483	46/8542	0.00869946	0.0195865	Eucgr.C00069/Eucgr.C00824/Eucgr.C02521/Eucgr.E03441/Eucgr.F02088/Eucgr.F02266/Eucgr.G01370/Eucgr.H00421/Eucgr.H01686/Eucgr.I02304/Eucgr.J01182/Eucgr.J01999/Eucgr.J02029/Eucgr.K00171/Eucgr.K01811	15
GO:0019012	virion	CC	12/1483	34/8542	0.00921691	0.0201907	Eucgr.B00583/Eucgr.B01475/Eucgr.B04011/Eucgr.C00155/Eucgr.C04084/Eucgr.C04091/Eucgr.D01204/Eucgr.G00444/Eucgr.G02908/Eucgr.H00136/Eucgr.H01111/Eucgr.K01365	12
GO:0044423	virion part	CC	12/1483	34/8542	0.00921691	0.0201907	Eucgr.B00583/Eucgr.B01475/Eucgr.B04011/Eucgr.C00155/Eucgr.C04084/Eucgr.C04091/Eucgr.D01204/Eucgr.G00444/Eucgr.G02908/Eucgr.H00136/Eucgr.H01111/Eucgr.K01365	12
GO:0099513	polymeric cytoskeletal fiber	CC	20/1483	68/8542	0.00964511	0.020847	Eucgr.A01263/Eucgr.C00627/Eucgr.C03845/Eucgr.D00655/Eucgr.D02446/Eucgr.E00053/Eucgr.E02482/Eucgr.F02315/Eucgr.F03419/Eucgr.F03510/Eucgr.F03803/Eucgr.G02621/Eucgr.H00823/Eucgr.I02064/Eucgr.J01062/Eucgr.J02123/Eucgr.J03017/Eucgr.K01666/Eucgr.K02233/Eucgr.K03590	20
GO:0099080	supramolecular complex	CC	20/1483	69/8542	0.0114237	0.0236325	Eucgr.A01263/Eucgr.C00627/Eucgr.C03845/Eucgr.D00655/Eucgr.D02446/Eucgr.E00053/Eucgr.E02482/Eucgr.F02315/Eucgr.F03419/Eucgr.F03510/Eucgr.F03803/Eucgr.G02621/Eucgr.H00823/Eucgr.I02064/Eucgr.J01062/Eucgr.J02123/Eucgr.J03017/Eucgr.K01666/Eucgr.K02233/Eucgr.K03590	20
GO:0099081	supramolecular polymer	CC	20/1483	69/8542	0.0114237	0.0236325	Eucgr.A01263/Eucgr.C00627/Eucgr.C03845/Eucgr.D00655/Eucgr.D02446/Eucgr.E00053/Eucgr.E02482/Eucgr.F02315/Eucgr.F03419/Eucgr.F03510/Eucgr.F03803/Eucgr.G02621/Eucgr.H00823/Eucgr.I02064/Eucgr.J01062/Eucgr.J02123/Eucgr.J03017/Eucgr.K01666/Eucgr.K02233/Eucgr.K03590	20

## Sheet: Xylem
Enriched GO terms considering the set of all methylated genes in xylem.
ID	Description	Ontology	GeneRatio	BgRatio	pvalue	qvalue	geneID	Count
GO:0051641	cellular localization	BP	104/1519	322/9326	4.00289e-13	3.75008e-10	Eucgr.A00001/Eucgr.A00035/Eucgr.A00473/Eucgr.A00509/Eucgr.A00543/Eucgr.A00600/Eucgr.A00607/Eucgr.A00647/Eucgr.A01050/Eucgr.A02017/Eucgr.A02575/Eucgr.A02966/Eucgr.A02967/Eucgr.A02971/Eucgr.B00317/Eucgr.B00583/Eucgr.B02209/Eucgr.B02594/Eucgr.B03196/Eucgr.B03952/Eucgr.C00132/Eucgr.C00480/Eucgr.C00627/Eucgr.C01579/Eucgr.C03817/Eucgr.C04138/Eucgr.D00483/Eucgr.D00655/Eucgr.D01026/Eucgr.D01986/Eucgr.D02…	104
GO:0051649	establishment of localization in cell	BP	88/1519	265/9326	5.04965e-12	2.31401e-09	Eucgr.A00001/Eucgr.A00035/Eucgr.A00509/Eucgr.A00543/Eucgr.A00600/Eucgr.A00607/Eucgr.A00647/Eucgr.A01050/Eucgr.A02017/Eucgr.A02575/Eucgr.A02966/Eucgr.A02971/Eucgr.B00317/Eucgr.B00583/Eucgr.B02209/Eucgr.B02594/Eucgr.B03196/Eucgr.B03952/Eucgr.C00132/Eucgr.C00480/Eucgr.C00627/Eucgr.C01579/Eucgr.C03817/Eucgr.C04138/Eucgr.D00483/Eucgr.D00655/Eucgr.D01026/Eucgr.D02081/Eucgr.D02427/Eucgr.D02446/Eucgr.D02…	88
GO:0046907	intracellular transport	BP	85/1519	254/9326	7.41003e-12	2.31401e-09	Eucgr.A00001/Eucgr.A00035/Eucgr.A00509/Eucgr.A00543/Eucgr.A00600/Eucgr.A00607/Eucgr.A00647/Eucgr.A01050/Eucgr.A02017/Eucgr.A02575/Eucgr.A02966/Eucgr.A02971/Eucgr.B00317/Eucgr.B00583/Eucgr.B02209/Eucgr.B02594/Eucgr.B03196/Eucgr.B03952/Eucgr.C00132/Eucgr.C00480/Eucgr.C00627/Eucgr.C01579/Eucgr.C03817/Eucgr.C04138/Eucgr.D00483/Eucgr.D00655/Eucgr.D01026/Eucgr.D02081/Eucgr.D02427/Eucgr.D02446/Eucgr.D02…	85
GO:0008104	protein localization	BP	94/1519	294/9326	1.08088e-11	2.53154e-09	Eucgr.A00001/Eucgr.A00035/Eucgr.A00473/Eucgr.A00509/Eucgr.A00543/Eucgr.A00600/Eucgr.A00607/Eucgr.A00647/Eucgr.A01050/Eucgr.A02017/Eucgr.A02575/Eucgr.A02966/Eucgr.A02967/Eucgr.A02971/Eucgr.B00317/Eucgr.B00583/Eucgr.B02209/Eucgr.B02594/Eucgr.B03952/Eucgr.C00132/Eucgr.C00480/Eucgr.C00627/Eucgr.C00951/Eucgr.C01046/Eucgr.C01579/Eucgr.C03673/Eucgr.C03817/Eucgr.C04138/Eucgr.D00483/Eucgr.D00655/Eucgr.D02…	94
GO:0015833	peptide transport	BP	85/1519	275/9326	7.26934e-10	8.7482e-08	Eucgr.A00001/Eucgr.A00035/Eucgr.A00509/Eucgr.A00543/Eucgr.A00600/Eucgr.A00607/Eucgr.A00647/Eucgr.A01050/Eucgr.A02017/Eucgr.A02966/Eucgr.A02967/Eucgr.A02971/Eucgr.B00317/Eucgr.B00583/Eucgr.B02209/Eucgr.B02594/Eucgr.B02629/Eucgr.B03952/Eucgr.C00132/Eucgr.C00480/Eucgr.C00627/Eucgr.C00951/Eucgr.C01046/Eucgr.C01579/Eucgr.C03673/Eucgr.C03817/Eucgr.C04138/Eucgr.D00483/Eucgr.D00655/Eucgr.D02427/Eucgr.D02…	85
GO:0006259	DNA metabolic process	BP	76/1519	256/9326	4.06862e-08	2.93204e-06	Eucgr.A01177/Eucgr.A01547/Eucgr.A01754/Eucgr.A02236/Eucgr.A02992/Eucgr.B00242/Eucgr.B00672/Eucgr.B00704/Eucgr.B01452/Eucgr.B01945/Eucgr.B02615/Eucgr.B03561/Eucgr.B03662/Eucgr.B03882/Eucgr.C00405/Eucgr.C01723/Eucgr.C02886/Eucgr.C03174/Eucgr.C03861/Eucgr.D00002/Eucgr.D00296/Eucgr.D00367/Eucgr.D00435/Eucgr.D00483/Eucgr.D00696/Eucgr.D01139/Eucgr.D01236/Eucgr.D01628/Eucgr.D02616/Eucgr.E00349/Eucgr.E00…	76
GO:0051128	regulation of cellular component organization	BP	34/1519	88/9326	3.58911e-07	2.24162e-05	Eucgr.A00035/Eucgr.A01050/Eucgr.A02017/Eucgr.B00609/Eucgr.B03561/Eucgr.C00100/Eucgr.C00824/Eucgr.C03194/Eucgr.C03799/Eucgr.C04376/Eucgr.D00427/Eucgr.D01840/Eucgr.E01037/Eucgr.E04332/Eucgr.F01177/Eucgr.F01600/Eucgr.F03069/Eucgr.F04480/Eucgr.G02360/Eucgr.H00823/Eucgr.H02768/Eucgr.H02816/Eucgr.H03031/Eucgr.H04037/Eucgr.I01462/Eucgr.I01475/Eucgr.I02503/Eucgr.J02123/Eucgr.J02844/Eucgr.K00914/Eucgr.K01…	34
GO:0071705	nitrogen compound transport	BP	100/1519	390/9326	9.68015e-07	5.66798e-05	Eucgr.A00001/Eucgr.A00035/Eucgr.A00509/Eucgr.A00543/Eucgr.A00600/Eucgr.A00607/Eucgr.A00647/Eucgr.A01050/Eucgr.A02017/Eucgr.A02966/Eucgr.A02967/Eucgr.A02971/Eucgr.B00317/Eucgr.B00583/Eucgr.B01476/Eucgr.B02209/Eucgr.B02594/Eucgr.B02629/Eucgr.B03714/Eucgr.B03952/Eucgr.C00132/Eucgr.C00480/Eucgr.C00627/Eucgr.C00667/Eucgr.C00951/Eucgr.C01046/Eucgr.C01579/Eucgr.C03673/Eucgr.C03817/Eucgr.C04138/Eucgr.D00…	100
GO:0051276	chromosome organization	BP	51/1519	164/9326	1.54304e-06	8.50342e-05	Eucgr.A01107/Eucgr.A01754/Eucgr.A02133/Eucgr.A02236/Eucgr.A02895/Eucgr.B00704/Eucgr.B01452/Eucgr.B01457/Eucgr.B01550/Eucgr.B01556/Eucgr.B03381/Eucgr.B03561/Eucgr.B03662/Eucgr.C00405/Eucgr.C00619/Eucgr.C00824/Eucgr.C03174/Eucgr.C03688/Eucgr.D00002/Eucgr.D01628/Eucgr.D02305/Eucgr.E00409/Eucgr.E00638/Eucgr.E02391/Eucgr.F01177/Eucgr.F03008/Eucgr.F03013/Eucgr.F03572/Eucgr.F03851/Eucgr.F04062/Eucgr.F04…	51
GO:0048523	negative regulation of cellular process	BP	37/1519	110/9326	5.62374e-06	0.000258968	Eucgr.A02083/Eucgr.B01356/Eucgr.B01774/Eucgr.B02503/Eucgr.B03381/Eucgr.B03561/Eucgr.C00739/Eucgr.C01809/Eucgr.C03168/Eucgr.C03688/Eucgr.C04019/Eucgr.D00483/Eucgr.E02475/Eucgr.E03350/Eucgr.F01177/Eucgr.F02571/Eucgr.F02825/Eucgr.F03751/Eucgr.F04480/Eucgr.G00556/Eucgr.G02360/Eucgr.G03219/Eucgr.H00823/Eucgr.H02748/Eucgr.H04042/Eucgr.H04558/Eucgr.I00013/Eucgr.I00536/Eucgr.I02503/Eucgr.J01260/Eucgr.J02…	37
GO:0048519	negative regulation of biological process	BP	57/1519	198/9326	5.80496e-06	0.000258968	Eucgr.A02017/Eucgr.A02083/Eucgr.A02925/Eucgr.B00033/Eucgr.B01356/Eucgr.B01774/Eucgr.B02503/Eucgr.B02582/Eucgr.B03381/Eucgr.B03561/Eucgr.B03714/Eucgr.B03826/Eucgr.C00406/Eucgr.C00739/Eucgr.C00824/Eucgr.C01809/Eucgr.C03168/Eucgr.C03688/Eucgr.C04019/Eucgr.D00483/Eucgr.D02653/Eucgr.E02414/Eucgr.E02475/Eucgr.E03350/Eucgr.F01177/Eucgr.F02571/Eucgr.F02825/Eucgr.F03751/Eucgr.F03766/Eucgr.F04480/Eucgr.G00…	57
GO:0009605	response to external stimulus	BP	49/1519	165/9326	1.02968e-05	0.000438475	Eucgr.A00285/Eucgr.A00908/Eucgr.A02946/Eucgr.B00238/Eucgr.B00544/Eucgr.B00853/Eucgr.B01356/Eucgr.B01476/Eucgr.B02209/Eucgr.B02470/Eucgr.B02478/Eucgr.B02495/Eucgr.B02999/Eucgr.B03196/Eucgr.C00406/Eucgr.C04019/Eucgr.C04138/Eucgr.D00642/Eucgr.D01061/Eucgr.E01026/Eucgr.E01504/Eucgr.E03208/Eucgr.F02954/Eucgr.F03423/Eucgr.F04303/Eucgr.F04428/Eucgr.G00990/Eucgr.G01779/Eucgr.H01087/Eucgr.H03436/Eucgr.H04…	49
GO:0009628	response to abiotic stimulus	BP	69/1519	262/9326	1.8478e-05	0.00075265	Eucgr.A00908/Eucgr.A02683/Eucgr.B00015/Eucgr.B00238/Eucgr.B00394/Eucgr.B00628/Eucgr.B01356/Eucgr.B01556/Eucgr.B02180/Eucgr.B02582/Eucgr.B02721/Eucgr.B02999/Eucgr.B03436/Eucgr.B03714/Eucgr.C00480/Eucgr.C00739/Eucgr.C02488/Eucgr.C02815/Eucgr.C02886/Eucgr.C03168/Eucgr.C03820/Eucgr.C04090/Eucgr.C04138/Eucgr.D00642/Eucgr.D01061/Eucgr.E02414/Eucgr.E03208/Eucgr.E03350/Eucgr.F01225/Eucgr.F02337/Eucgr.F02…	69
GO:0048193	Golgi vesicle transport	BP	28/1519	79/9326	2.56478e-05	0.000858952	Eucgr.A00473/Eucgr.A02575/Eucgr.B00707/Eucgr.B02594/Eucgr.B03390/Eucgr.C01004/Eucgr.C02306/Eucgr.D00483/Eucgr.D01026/Eucgr.D02081/Eucgr.D02473/Eucgr.D02557/Eucgr.E00370/Eucgr.E02021/Eucgr.F03341/Eucgr.F04242/Eucgr.G00871/Eucgr.G01708/Eucgr.G01711/Eucgr.G01717/Eucgr.G02381/Eucgr.G02726/Eucgr.H03169/Eucgr.H03367/Eucgr.J02845/Eucgr.J03008/Eucgr.K00564/Eucgr.K01948	28
GO:0035556	intracellular signal transduction	BP	67/1519	255/9326	2.63904e-05	0.000858952	Eucgr.A00779/Eucgr.A00803/Eucgr.A01405/Eucgr.A01527/Eucgr.A02545/Eucgr.B00215/Eucgr.B00222/Eucgr.B00380/Eucgr.B00544/Eucgr.B00575/Eucgr.B00871/Eucgr.B00942/Eucgr.B01052/Eucgr.B01356/Eucgr.B01990/Eucgr.B02547/Eucgr.B03196/Eucgr.C00012/Eucgr.C00380/Eucgr.C00756/Eucgr.C01141/Eucgr.C04019/Eucgr.D00474/Eucgr.D00642/Eucgr.E00022/Eucgr.E00308/Eucgr.E00370/Eucgr.E00386/Eucgr.F00222/Eucgr.F01598/Eucgr.F03…	67
GO:0009791	post-embryonic development	BP	68/1519	260/9326	2.70289e-05	0.000858952	Eucgr.A00534/Eucgr.A01411/Eucgr.A01617/Eucgr.A02139/Eucgr.A02925/Eucgr.B00238/Eucgr.B00394/Eucgr.B00544/Eucgr.B01356/Eucgr.B01476/Eucgr.B02532/Eucgr.B02582/Eucgr.B03196/Eucgr.B03436/Eucgr.B03714/Eucgr.C00066/Eucgr.C00633/Eucgr.C00739/Eucgr.C00824/Eucgr.C01007/Eucgr.C01428/Eucgr.C02886/Eucgr.C03980/Eucgr.C04030/Eucgr.C04138/Eucgr.D00642/Eucgr.D01061/Eucgr.D02427/Eucgr.E00053/Eucgr.E01449/Eucgr.E02…	68
GO:0007049	cell cycle	BP	42/1519	139/9326	2.75058e-05	0.000858952	Eucgr.A01107/Eucgr.A01177/Eucgr.A02895/Eucgr.B01452/Eucgr.B03196/Eucgr.B03662/Eucgr.C00739/Eucgr.C01007/Eucgr.C02726/Eucgr.C02886/Eucgr.D00483/Eucgr.D00655/Eucgr.E00053/Eucgr.E00349/Eucgr.E00409/Eucgr.E02475/Eucgr.F00650/Eucgr.F01076/Eucgr.F03311/Eucgr.F03341/Eucgr.F03505/Eucgr.F03751/Eucgr.F04480/Eucgr.G02908/Eucgr.H00025/Eucgr.H02748/Eucgr.H02905/Eucgr.H03550/Eucgr.H04558/Eucgr.I00013/Eucgr.I00…	42
GO:0043087	regulation of GTPase activity	BP	19/1519	45/9326	3.20261e-05	0.000923012	Eucgr.A00035/Eucgr.A01700/Eucgr.A02912/Eucgr.B02225/Eucgr.B03196/Eucgr.B03736/Eucgr.C00756/Eucgr.C03168/Eucgr.D00176/Eucgr.E01037/Eucgr.F00743/Eucgr.F02135/Eucgr.G03244/Eucgr.H03367/Eucgr.H04699/Eucgr.I01475/Eucgr.I01543/Eucgr.K01884/Eucgr.K02348	19
GO:0043603	cellular amide metabolic process	BP	107/1519	458/9326	3.70645e-05	0.00102128	Eucgr.A00019/Eucgr.A00214/Eucgr.A00394/Eucgr.A00608/Eucgr.A00913/Eucgr.A00956/Eucgr.A01322/Eucgr.A02083/Eucgr.A02294/Eucgr.A02359/Eucgr.A02510/Eucgr.A02776/Eucgr.A02903/Eucgr.B00021/Eucgr.B00214/Eucgr.B01310/Eucgr.B01356/Eucgr.B01418/Eucgr.B01462/Eucgr.B01628/Eucgr.B01908/Eucgr.B02210/Eucgr.B02610/Eucgr.B03469/Eucgr.B03662/Eucgr.B03733/Eucgr.C00652/Eucgr.C00667/Eucgr.C00848/Eucgr.C01159/Eucgr.C02…	107
GO:0006974	cellular response to DNA damage stimulus	BP	48/1519	171/9326	6.28585e-05	0.0015497	Eucgr.A01177/Eucgr.A01547/Eucgr.A01754/Eucgr.B00242/Eucgr.B00704/Eucgr.B01452/Eucgr.B01945/Eucgr.B03882/Eucgr.C01723/Eucgr.C03174/Eucgr.C03861/Eucgr.D00296/Eucgr.D00367/Eucgr.E00349/Eucgr.E00409/Eucgr.E00638/Eucgr.E02414/Eucgr.F01076/Eucgr.F01600/Eucgr.F03261/Eucgr.G00023/Eucgr.G00562/Eucgr.G02569/Eucgr.H00025/Eucgr.H00464/Eucgr.H00676/Eucgr.H01157/Eucgr.H01340/Eucgr.H02905/Eucgr.H04558/Eucgr.H04…	48
GO:0019637	organophosphate metabolic process	BP	74/1519	297/9326	7.01474e-05	0.00168505	Eucgr.A00496/Eucgr.A00534/Eucgr.A00642/Eucgr.A00733/Eucgr.A00868/Eucgr.A01374/Eucgr.A01538/Eucgr.A01618/Eucgr.A02290/Eucgr.B00532/Eucgr.B00660/Eucgr.B02421/Eucgr.B02495/Eucgr.B03528/Eucgr.C00739/Eucgr.C03186/Eucgr.D01306/Eucgr.D01933/Eucgr.E00410/Eucgr.E00960/Eucgr.E01025/Eucgr.E01881/Eucgr.E02668/Eucgr.E03445/Eucgr.E03818/Eucgr.E03917/Eucgr.F00711/Eucgr.F01464/Eucgr.F01561/Eucgr.F01594/Eucgr.F01…	74
GO:0048573	photoperiodism, flowering	BP	9/1519	14/9326	7.21889e-05	0.00169074	Eucgr.B00394/Eucgr.B03714/Eucgr.D00642/Eucgr.E02414/Eucgr.E03208/Eucgr.F02686/Eucgr.F03613/Eucgr.G02854/Eucgr.K00737	9
GO:0033993	response to lipid	BP	38/1519	127/9326	8.24671e-05	0.00184618	Eucgr.A00534/Eucgr.A01617/Eucgr.A02545/Eucgr.B00015/Eucgr.B00033/Eucgr.B00544/Eucgr.B00660/Eucgr.B03662/Eucgr.B03714/Eucgr.B03812/Eucgr.C00739/Eucgr.C03168/Eucgr.C04019/Eucgr.D02473/Eucgr.E00022/Eucgr.E00047/Eucgr.E00221/Eucgr.E03350/Eucgr.F01225/Eucgr.F02337/Eucgr.F03336/Eucgr.G00556/Eucgr.G03076/Eucgr.G03219/Eucgr.H04632/Eucgr.H04699/Eucgr.I00017/Eucgr.I01070/Eucgr.J00923/Eucgr.J02086/Eucgr.J02…	38
GO:0046854	phosphatidylinositol phosphorylation	BP	11/1519	20/9326	8.27668e-05	0.00184618	Eucgr.A01618/Eucgr.C03186/Eucgr.E01881/Eucgr.E03818/Eucgr.E03917/Eucgr.F02638/Eucgr.F03343/Eucgr.G00577/Eucgr.G01697/Eucgr.H02571/Eucgr.J02598	11
GO:1901135	carbohydrate derivative metabolic process	BP	73/1519	295/9326	9.90011e-05	0.00215694	Eucgr.A00534/Eucgr.A00642/Eucgr.A00868/Eucgr.A01374/Eucgr.A01538/Eucgr.A02290/Eucgr.A02946/Eucgr.B00532/Eucgr.B00630/Eucgr.B00660/Eucgr.B02421/Eucgr.B02495/Eucgr.B03480/Eucgr.B03528/Eucgr.C00320/Eucgr.C00495/Eucgr.C00793/Eucgr.D00343/Eucgr.E00189/Eucgr.E00960/Eucgr.E02668/Eucgr.E03445/Eucgr.F01561/Eucgr.F01594/Eucgr.F01647/Eucgr.F01823/Eucgr.F02367/Eucgr.F02506/Eucgr.F02916/Eucgr.F02980/Eucgr.F03…	73
GO:0009737	response to abscisic acid	BP	33/1519	107/9326	0.000125154	0.0025489	Eucgr.A00534/Eucgr.A01617/Eucgr.A02545/Eucgr.B00015/Eucgr.B00033/Eucgr.B00544/Eucgr.B00660/Eucgr.B03714/Eucgr.C00739/Eucgr.C03168/Eucgr.C04019/Eucgr.D02473/Eucgr.E00022/Eucgr.E00047/Eucgr.E03350/Eucgr.F01225/Eucgr.F02337/Eucgr.F03336/Eucgr.G00556/Eucgr.G03076/Eucgr.G03219/Eucgr.H04632/Eucgr.H04699/Eucgr.I00017/Eucgr.I01070/Eucgr.J00923/Eucgr.J02086/Eucgr.J02432/Eucgr.J02935/Eucgr.K00729/Eucgr.K01…	33
GO:0048583	regulation of response to stimulus	BP	47/1519	173/9326	0.000175943	0.00316982	Eucgr.A00285/Eucgr.A00803/Eucgr.A01454/Eucgr.B00222/Eucgr.B00853/Eucgr.B01052/Eucgr.B02547/Eucgr.B02582/Eucgr.B03056/Eucgr.B03196/Eucgr.C00739/Eucgr.C00756/Eucgr.C01141/Eucgr.C01809/Eucgr.C03168/Eucgr.C04019/Eucgr.D00642/Eucgr.E02414/Eucgr.E03208/Eucgr.E03814/Eucgr.F01225/Eucgr.F02686/Eucgr.F03336/Eucgr.G00037/Eucgr.G00556/Eucgr.G01779/Eucgr.G02115/Eucgr.G02854/Eucgr.G03219/Eucgr.H03414/Eucgr.H04…	47
GO:0022607	cellular component assembly	BP	68/1519	276/9326	0.00019467	0.00331592	Eucgr.A00190/Eucgr.A00286/Eucgr.A00993/Eucgr.A01050/Eucgr.A02017/Eucgr.A02139/Eucgr.A02344/Eucgr.A02510/Eucgr.A02575/Eucgr.B00173/Eucgr.B00628/Eucgr.B01428/Eucgr.C00241/Eucgr.C00619/Eucgr.C01715/Eucgr.C02153/Eucgr.C02726/Eucgr.C03194/Eucgr.C03817/Eucgr.C03953/Eucgr.C04084/Eucgr.C04131/Eucgr.C04376/Eucgr.D00427/Eucgr.D00655/Eucgr.D01820/Eucgr.D02081/Eucgr.E00053/Eucgr.E01504/Eucgr.E02397/Eucgr.E02…	68
GO:0046835	carbohydrate phosphorylation	BP	12/1519	25/9326	0.000216485	0.00359066	Eucgr.A02848/Eucgr.A02851/Eucgr.C02197/Eucgr.F00471/Eucgr.F01647/Eucgr.F01823/Eucgr.F02835/Eucgr.H00494/Eucgr.H04065/Eucgr.I01312/Eucgr.J01899/Eucgr.K00768	12
GO:0006732	coenzyme metabolic process	BP	43/1519	156/9326	0.000231318	0.0036118	Eucgr.A00394/Eucgr.A00868/Eucgr.A01538/Eucgr.A02294/Eucgr.B00532/Eucgr.B02421/Eucgr.B02610/Eucgr.B03528/Eucgr.C00793/Eucgr.C01875/Eucgr.E01025/Eucgr.E02668/Eucgr.F00711/Eucgr.F01464/Eucgr.F01561/Eucgr.F01594/Eucgr.F01647/Eucgr.F01823/Eucgr.F02167/Eucgr.F02506/Eucgr.F03307/Eucgr.F03840/Eucgr.G00060/Eucgr.G01120/Eucgr.G01905/Eucgr.G02402/Eucgr.G02823/Eucgr.H00086/Eucgr.H02539/Eucgr.H03385/Eucgr.I00…	43
GO:0009787	regulation of abscisic acid-activated signaling pathway	BP	8/1519	13/9326	0.000289257	0.00416905	Eucgr.C00739/Eucgr.C03168/Eucgr.C04019/Eucgr.F01225/Eucgr.F03336/Eucgr.G00556/Eucgr.G03219/Eucgr.J02935	8
GO:1905957	regulation of cellular response to alcohol	BP	8/1519	13/9326	0.000289257	0.00416905	Eucgr.C00739/Eucgr.C03168/Eucgr.C04019/Eucgr.F01225/Eucgr.F03336/Eucgr.G00556/Eucgr.G03219/Eucgr.J02935	8
GO:0043085	positive regulation of catalytic activity	BP	29/1519	95/9326	0.000381431	0.00510486	Eucgr.A00035/Eucgr.A00803/Eucgr.A01700/Eucgr.B00033/Eucgr.B00222/Eucgr.B01052/Eucgr.B02225/Eucgr.B02547/Eucgr.B03196/Eucgr.B03736/Eucgr.B03826/Eucgr.C00739/Eucgr.C00756/Eucgr.C01141/Eucgr.D00176/Eucgr.E01037/Eucgr.F00743/Eucgr.F02016/Eucgr.G00037/Eucgr.G03244/Eucgr.H03367/Eucgr.H03550/Eucgr.H04206/Eucgr.H04382/Eucgr.H04699/Eucgr.I01475/Eucgr.I01543/Eucgr.K01221/Eucgr.K02348	29
GO:0044093	positive regulation of molecular function	BP	29/1519	95/9326	0.000381431	0.00510486	Eucgr.A00035/Eucgr.A00803/Eucgr.A01700/Eucgr.B00033/Eucgr.B00222/Eucgr.B01052/Eucgr.B02225/Eucgr.B02547/Eucgr.B03196/Eucgr.B03736/Eucgr.B03826/Eucgr.C00739/Eucgr.C00756/Eucgr.C01141/Eucgr.D00176/Eucgr.E01037/Eucgr.F00743/Eucgr.F02016/Eucgr.G00037/Eucgr.G03244/Eucgr.H03367/Eucgr.H03550/Eucgr.H04206/Eucgr.H04382/Eucgr.H04699/Eucgr.I01475/Eucgr.I01543/Eucgr.K01221/Eucgr.K02348	29
GO:0006606	protein import into nucleus	BP	14/1519	34/9326	0.000477837	0.00597638	Eucgr.A00600/Eucgr.D02427/Eucgr.F03709/Eucgr.F04480/Eucgr.G01904/Eucgr.G02106/Eucgr.H04107/Eucgr.I02730/Eucgr.J01771/Eucgr.J02948/Eucgr.K01721/Eucgr.K02007/Eucgr.K03215/Eucgr.L02718	14
GO:0000902	cell morphogenesis	BP	22/1519	66/9326	0.000497584	0.00597638	Eucgr.A02622/Eucgr.B00609/Eucgr.B03196/Eucgr.B03662/Eucgr.C00633/Eucgr.C03799/Eucgr.C04398/Eucgr.D00052/Eucgr.D01840/Eucgr.E00053/Eucgr.F01498/Eucgr.F03001/Eucgr.F03069/Eucgr.H03031/Eucgr.H04037/Eucgr.I01475/Eucgr.I02068/Eucgr.J00539/Eucgr.J02838/Eucgr.J02844/Eucgr.K00800/Eucgr.K02348	22
GO:1901137	carbohydrate derivative biosynthetic process	BP	46/1519	176/9326	0.00052712	0.00617285	Eucgr.A00534/Eucgr.A00642/Eucgr.A00868/Eucgr.A01374/Eucgr.A01538/Eucgr.A02290/Eucgr.B00660/Eucgr.B03480/Eucgr.C00320/Eucgr.C00495/Eucgr.D00343/Eucgr.E00189/Eucgr.E00960/Eucgr.E02668/Eucgr.E03445/Eucgr.F01561/Eucgr.F01594/Eucgr.F01647/Eucgr.F01823/Eucgr.F02506/Eucgr.F03473/Eucgr.F03667/Eucgr.F04117/Eucgr.G01905/Eucgr.G02224/Eucgr.G02933/Eucgr.G03076/Eucgr.H00023/Eucgr.H01160/Eucgr.H01403/Eucgr.H02…	46
GO:0050793	regulation of developmental process	BP	33/1519	116/9326	0.000648834	0.00728234	Eucgr.A02017/Eucgr.A02925/Eucgr.B00609/Eucgr.B02582/Eucgr.C00824/Eucgr.C01428/Eucgr.C02886/Eucgr.C03799/Eucgr.D00642/Eucgr.D01061/Eucgr.D01840/Eucgr.D02427/Eucgr.E00139/Eucgr.E02414/Eucgr.E03208/Eucgr.F02686/Eucgr.F03069/Eucgr.F04205/Eucgr.G00556/Eucgr.G02854/Eucgr.H03031/Eucgr.H04037/Eucgr.H04314/Eucgr.H04418/Eucgr.H04632/Eucgr.H04789/Eucgr.I01475/Eucgr.I02357/Eucgr.I02503/Eucgr.J02086/Eucgr.J02…	33
GO:0070647	protein modification by small protein conjugation or removal	BP	47/1519	183/9326	0.000699167	0.00752885	Eucgr.A00261/Eucgr.A02560/Eucgr.A02915/Eucgr.B00369/Eucgr.B00398/Eucgr.B02466/Eucgr.B02470/Eucgr.B02478/Eucgr.B03056/Eucgr.B03561/Eucgr.B03800/Eucgr.C01428/Eucgr.C01723/Eucgr.C01814/Eucgr.C03980/Eucgr.E00258/Eucgr.E02414/Eucgr.F00711/Eucgr.F01066/Eucgr.F02042/Eucgr.F02160/Eucgr.F03261/Eucgr.F03540/Eucgr.G00074/Eucgr.G01986/Eucgr.G02967/Eucgr.G03219/Eucgr.H02615/Eucgr.H03185/Eucgr.H03283/Eucgr.H04…	47
GO:0006760	folic acid-containing compound metabolic process	BP	10/1519	21/9326	0.000794789	0.0083662	Eucgr.A00394/Eucgr.A02294/Eucgr.B02610/Eucgr.F01594/Eucgr.F02167/Eucgr.G02823/Eucgr.I00580/Eucgr.I02741/Eucgr.J02122/Eucgr.K03460	10
GO:0009719	response to endogenous stimulus	BP	70/1519	302/9326	0.00101014	0.00996154	Eucgr.A00534/Eucgr.A01617/Eucgr.A02545/Eucgr.B00015/Eucgr.B00033/Eucgr.B00238/Eucgr.B00544/Eucgr.B00660/Eucgr.B02421/Eucgr.B02495/Eucgr.B03662/Eucgr.B03714/Eucgr.B03812/Eucgr.C00633/Eucgr.C00739/Eucgr.C01007/Eucgr.C01809/Eucgr.C02178/Eucgr.C03168/Eucgr.C03293/Eucgr.C04019/Eucgr.C04235/Eucgr.D00642/Eucgr.D00716/Eucgr.D02473/Eucgr.E00022/Eucgr.E00047/Eucgr.E00221/Eucgr.E02414/Eucgr.E03350/Eucgr.E03…	70
GO:0048518	positive regulation of biological process	BP	49/1519	196/9326	0.00103633	0.0101133	Eucgr.A00261/Eucgr.A00285/Eucgr.A00803/Eucgr.A00908/Eucgr.B00222/Eucgr.B00853/Eucgr.B01052/Eucgr.B01487/Eucgr.B02547/Eucgr.C00100/Eucgr.C00241/Eucgr.C00739/Eucgr.C00824/Eucgr.C01141/Eucgr.C03168/Eucgr.C04090/Eucgr.C04376/Eucgr.D00052/Eucgr.D00642/Eucgr.D01061/Eucgr.D02427/Eucgr.E00258/Eucgr.E03208/Eucgr.E04332/Eucgr.F01177/Eucgr.F01225/Eucgr.F01600/Eucgr.F02686/Eucgr.G00037/Eucgr.G02360/Eucgr.H02…	49
GO:0044085	cellular component biogenesis	BP	98/1519	450/9326	0.00109323	0.0105586	Eucgr.A00190/Eucgr.A00286/Eucgr.A00993/Eucgr.A01050/Eucgr.A01411/Eucgr.A02017/Eucgr.A02139/Eucgr.A02344/Eucgr.A02507/Eucgr.A02510/Eucgr.A02575/Eucgr.B00173/Eucgr.B00382/Eucgr.B00628/Eucgr.B00630/Eucgr.B01028/Eucgr.B01360/Eucgr.B01428/Eucgr.B03662/Eucgr.B03848/Eucgr.C00241/Eucgr.C00619/Eucgr.C01159/Eucgr.C01715/Eucgr.C02153/Eucgr.C02168/Eucgr.C02726/Eucgr.C03194/Eucgr.C03817/Eucgr.C03953/Eucgr.C04…	98
GO:0009755	hormone-mediated signaling pathway	BP	38/1519	143/9326	0.001113	0.0106398	Eucgr.A02545/Eucgr.B00544/Eucgr.B03812/Eucgr.C00739/Eucgr.C01809/Eucgr.C02178/Eucgr.C03168/Eucgr.C03293/Eucgr.C04019/Eucgr.D00642/Eucgr.D00716/Eucgr.E00022/Eucgr.E00221/Eucgr.E02414/Eucgr.E03350/Eucgr.F01225/Eucgr.F02337/Eucgr.F03336/Eucgr.G00076/Eucgr.G00556/Eucgr.G01779/Eucgr.G01952/Eucgr.G03219/Eucgr.H04635/Eucgr.I02216/Eucgr.J00614/Eucgr.J00923/Eucgr.J02086/Eucgr.J02432/Eucgr.J02935/Eucgr.K01…	38
GO:0044087	regulation of cellular component biogenesis	BP	12/1519	29/9326	0.00114412	0.0108212	Eucgr.A01050/Eucgr.A02017/Eucgr.C03194/Eucgr.C04376/Eucgr.D00427/Eucgr.E04332/Eucgr.F01600/Eucgr.G02360/Eucgr.H02768/Eucgr.H02816/Eucgr.I02503/Eucgr.K00914	12
GO:0055086	nucleobase-containing small molecule metabolic process	BP	56/1519	234/9326	0.00144127	0.012619	Eucgr.A00534/Eucgr.A00642/Eucgr.A00733/Eucgr.A00868/Eucgr.A01374/Eucgr.A01538/Eucgr.B00532/Eucgr.B00630/Eucgr.B00660/Eucgr.B02421/Eucgr.B03528/Eucgr.C00793/Eucgr.D00343/Eucgr.E00960/Eucgr.E01025/Eucgr.E02668/Eucgr.E03116/Eucgr.E03319/Eucgr.E03445/Eucgr.F01561/Eucgr.F01594/Eucgr.F01647/Eucgr.F01823/Eucgr.F02506/Eucgr.F02916/Eucgr.F03307/Eucgr.F03667/Eucgr.F03840/Eucgr.G00660/Eucgr.G00868/Eucgr.G01…	56
GO:0003006	developmental process involved in reproduction	BP	53/1519	219/9326	0.0014643	0.0126757	Eucgr.A00534/Eucgr.A01411/Eucgr.A02139/Eucgr.A02143/Eucgr.A02925/Eucgr.B00238/Eucgr.B00394/Eucgr.B00544/Eucgr.B02532/Eucgr.B03196/Eucgr.B03714/Eucgr.C00066/Eucgr.C00633/Eucgr.C00739/Eucgr.C00824/Eucgr.C01007/Eucgr.C03980/Eucgr.C04030/Eucgr.C04138/Eucgr.D00642/Eucgr.D01061/Eucgr.D02427/Eucgr.E00053/Eucgr.E01449/Eucgr.E02414/Eucgr.E03208/Eucgr.F02686/Eucgr.F03336/Eucgr.F03613/Eucgr.F03633/Eucgr.F04…	53
GO:0010119	regulation of stomatal movement	BP	8/1519	16/9326	0.00182528	0.0142971	Eucgr.C02815/Eucgr.C03168/Eucgr.C04019/Eucgr.J02086/Eucgr.K00737/Eucgr.K01029/Eucgr.K01030/Eucgr.K01031	8
GO:0023057	negative regulation of signaling	BP	8/1519	16/9326	0.00182528	0.0142971	Eucgr.C00739/Eucgr.C03168/Eucgr.C04019/Eucgr.G00556/Eucgr.G03219/Eucgr.J02086/Eucgr.K00729/Eucgr.K02568	8
GO:0006413	translational initiation	BP	22/1519	72/9326	0.00183132	0.0142971	Eucgr.A00214/Eucgr.A01322/Eucgr.A02510/Eucgr.B01418/Eucgr.B03733/Eucgr.C02505/Eucgr.D00299/Eucgr.E02475/Eucgr.F01432/Eucgr.F02713/Eucgr.F03737/Eucgr.F03906/Eucgr.G03244/Eucgr.H03938/Eucgr.I02078/Eucgr.I02131/Eucgr.J00634/Eucgr.J00859/Eucgr.J01252/Eucgr.J01999/Eucgr.J02029/Eucgr.K02304	22
GO:0016049	cell growth	BP	22/1519	72/9326	0.00183132	0.0142971	Eucgr.A00190/Eucgr.B00609/Eucgr.B00628/Eucgr.B02470/Eucgr.B02478/Eucgr.B03196/Eucgr.C00633/Eucgr.C02815/Eucgr.C04398/Eucgr.D00052/Eucgr.D00310/Eucgr.D00483/Eucgr.F01498/Eucgr.F03001/Eucgr.H00823/Eucgr.I00378/Eucgr.I01475/Eucgr.I02068/Eucgr.I02503/Eucgr.J01392/Eucgr.J02293/Eucgr.K03590	22
GO:0023051	regulation of signaling	BP	33/1519	123/9326	0.00192978	0.0146984	Eucgr.A00803/Eucgr.A01454/Eucgr.B00222/Eucgr.B01052/Eucgr.B02547/Eucgr.B03056/Eucgr.B03196/Eucgr.C00739/Eucgr.C00756/Eucgr.C01141/Eucgr.C01809/Eucgr.C03168/Eucgr.C04019/Eucgr.D00642/Eucgr.E03814/Eucgr.F01225/Eucgr.F03336/Eucgr.G00037/Eucgr.G00556/Eucgr.G01779/Eucgr.G03219/Eucgr.H04382/Eucgr.H04635/Eucgr.I01543/Eucgr.J00522/Eucgr.J02086/Eucgr.J02935/Eucgr.K00729/Eucgr.K01221/Eucgr.K02348/Eucgr.K02…	33
GO:0043933	protein-containing complex subunit organization	BP	51/1519	212/9326	0.00204165	0.0151647	Eucgr.A00286/Eucgr.A00993/Eucgr.A01050/Eucgr.A02017/Eucgr.A02139/Eucgr.A02510/Eucgr.B01428/Eucgr.B01462/Eucgr.C00619/Eucgr.C03817/Eucgr.C04084/Eucgr.C04218/Eucgr.C04376/Eucgr.D01820/Eucgr.D02081/Eucgr.E02397/Eucgr.E02475/Eucgr.E04332/Eucgr.F01600/Eucgr.F02817/Eucgr.F03008/Eucgr.F03879/Eucgr.F03965/Eucgr.F04242/Eucgr.G00004/Eucgr.G00074/Eucgr.G02350/Eucgr.G02360/Eucgr.G03266/Eucgr.H00823/Eucgr.H01…	51
GO:0000045	autophagosome assembly	BP	7/1519	13/9326	0.00207194	0.0151647	Eucgr.A02575/Eucgr.B00173/Eucgr.C00241/Eucgr.E01504/Eucgr.I01159/Eucgr.J00097/Eucgr.K03157	7
GO:1905037	autophagosome organization	BP	7/1519	13/9326	0.00207194	0.0151647	Eucgr.A02575/Eucgr.B00173/Eucgr.C00241/Eucgr.E01504/Eucgr.I01159/Eucgr.J00097/Eucgr.K03157	7
GO:0048522	positive regulation of cellular process	BP	40/1519	158/9326	0.00224632	0.0159428	Eucgr.A00261/Eucgr.A00803/Eucgr.A00908/Eucgr.B00222/Eucgr.B01052/Eucgr.B01487/Eucgr.B02547/Eucgr.C00100/Eucgr.C00241/Eucgr.C00739/Eucgr.C00824/Eucgr.C01141/Eucgr.C03168/Eucgr.C04090/Eucgr.C04376/Eucgr.D00052/Eucgr.E00258/Eucgr.E03208/Eucgr.E04332/Eucgr.F01177/Eucgr.F01225/Eucgr.F01600/Eucgr.G00037/Eucgr.G02360/Eucgr.H02768/Eucgr.H02816/Eucgr.H03550/Eucgr.H04206/Eucgr.H04382/Eucgr.H04623/Eucgr.H04…	40
GO:2000241	regulation of reproductive process	BP	16/1519	48/9326	0.00281166	0.0189503	Eucgr.A02925/Eucgr.C00824/Eucgr.D00642/Eucgr.D01061/Eucgr.D02427/Eucgr.E03208/Eucgr.F02686/Eucgr.G02854/Eucgr.H04314/Eucgr.H04418/Eucgr.H04632/Eucgr.H04789/Eucgr.I01475/Eucgr.I02357/Eucgr.J00539/Eucgr.K01213	16
GO:0031327	negative regulation of cellular biosynthetic process	BP	15/1519	44/9326	0.00294716	0.018991	Eucgr.A02083/Eucgr.B01356/Eucgr.B02503/Eucgr.B03381/Eucgr.B03561/Eucgr.C01809/Eucgr.C03688/Eucgr.D00483/Eucgr.E03350/Eucgr.F01177/Eucgr.F02571/Eucgr.G00556/Eucgr.G02360/Eucgr.I00536/Eucgr.K02861	15
GO:0016236	macroautophagy	BP	7/1519	14/9326	0.00356519	0.0214768	Eucgr.A02575/Eucgr.B00173/Eucgr.C00241/Eucgr.E01504/Eucgr.I01159/Eucgr.J00097/Eucgr.K03157	7
GO:0043254	regulation of protein complex assembly	BP	9/1519	21/9326	0.00357624	0.0214768	Eucgr.A01050/Eucgr.A02017/Eucgr.C04376/Eucgr.E04332/Eucgr.F01600/Eucgr.G02360/Eucgr.H02768/Eucgr.H02816/Eucgr.K00914	9
GO:0010558	negative regulation of macromolecule biosynthetic process	BP	14/1519	41/9326	0.00395162	0.0232833	Eucgr.A02083/Eucgr.B01356/Eucgr.B02503/Eucgr.B03381/Eucgr.B03561/Eucgr.C01809/Eucgr.C03688/Eucgr.D00483/Eucgr.E03350/Eucgr.F01177/Eucgr.G00556/Eucgr.G02360/Eucgr.I00536/Eucgr.K02861	14
GO:0009653	anatomical structure morphogenesis	BP	39/1519	159/9326	0.00456873	0.0259478	Eucgr.A01617/Eucgr.A02622/Eucgr.B00238/Eucgr.B00609/Eucgr.B02504/Eucgr.B03196/Eucgr.B03662/Eucgr.C00066/Eucgr.C00633/Eucgr.C01007/Eucgr.C01715/Eucgr.C02153/Eucgr.C02815/Eucgr.C02886/Eucgr.C03799/Eucgr.C04398/Eucgr.D00052/Eucgr.D01840/Eucgr.D02305/Eucgr.E00053/Eucgr.F01498/Eucgr.F03001/Eucgr.F03069/Eucgr.F03261/Eucgr.F03676/Eucgr.H03031/Eucgr.H04037/Eucgr.H04418/Eucgr.H04635/Eucgr.H04789/Eucgr.I01…	39
GO:0071396	cellular response to lipid	BP	22/1519	77/9326	0.00460094	0.0259478	Eucgr.A02545/Eucgr.B00544/Eucgr.B03812/Eucgr.C00739/Eucgr.C03168/Eucgr.C04019/Eucgr.E00022/Eucgr.E00221/Eucgr.E03350/Eucgr.F01225/Eucgr.F02337/Eucgr.F03336/Eucgr.G00556/Eucgr.G03219/Eucgr.H04632/Eucgr.J00923/Eucgr.J02432/Eucgr.J02935/Eucgr.K01420/Eucgr.K02568/Eucgr.K02914/Eucgr.L02550	22
GO:0051239	regulation of multicellular organismal process	BP	23/1519	82/9326	0.00489927	0.0268412	Eucgr.A02017/Eucgr.A02925/Eucgr.B02582/Eucgr.C00824/Eucgr.C01428/Eucgr.C02886/Eucgr.D00642/Eucgr.D01061/Eucgr.D02427/Eucgr.E00139/Eucgr.E02414/Eucgr.E03208/Eucgr.F02686/Eucgr.G00556/Eucgr.G02854/Eucgr.H04314/Eucgr.H04418/Eucgr.H04632/Eucgr.H04789/Eucgr.I01475/Eucgr.I02357/Eucgr.I02503/Eucgr.J02086	23
GO:0040029	regulation of gene expression, epigenetic	BP	13/1519	38/9326	0.00530752	0.0284132	Eucgr.A02925/Eucgr.B02503/Eucgr.B03561/Eucgr.B03714/Eucgr.C00406/Eucgr.C03688/Eucgr.D02305/Eucgr.D02653/Eucgr.F01177/Eucgr.H03436/Eucgr.H04418/Eucgr.H04789/Eucgr.K02861	13
GO:0051321	meiotic cell cycle	BP	12/1519	34/9326	0.0054919	0.029068	Eucgr.A01177/Eucgr.E00349/Eucgr.E00409/Eucgr.F01076/Eucgr.H00025/Eucgr.H02748/Eucgr.H02905/Eucgr.I00435/Eucgr.J00539/Eucgr.J00844/Eucgr.J01370/Eucgr.K01213	12
GO:0071215	cellular response to abscisic acid stimulus	BP	18/1519	60/9326	0.00569154	0.029459	Eucgr.A02545/Eucgr.B00544/Eucgr.C00739/Eucgr.C03168/Eucgr.C04019/Eucgr.E00022/Eucgr.E03350/Eucgr.F01225/Eucgr.F02337/Eucgr.F03336/Eucgr.G00556/Eucgr.G03219/Eucgr.H04632/Eucgr.J00923/Eucgr.J02432/Eucgr.J02935/Eucgr.K01420/Eucgr.K02914	18
GO:0097306	cellular response to alcohol	BP	18/1519	60/9326	0.00569154	0.029459	Eucgr.A02545/Eucgr.B00544/Eucgr.C00739/Eucgr.C03168/Eucgr.C04019/Eucgr.E00022/Eucgr.E03350/Eucgr.F01225/Eucgr.F02337/Eucgr.F03336/Eucgr.G00556/Eucgr.G03219/Eucgr.H04632/Eucgr.J00923/Eucgr.J02432/Eucgr.J02935/Eucgr.K01420/Eucgr.K02914	18
GO:0006090	pyruvate metabolic process	BP	15/1519	47/9326	0.00596703	0.0303813	Eucgr.A00868/Eucgr.A01538/Eucgr.B02495/Eucgr.F01561/Eucgr.F01647/Eucgr.F01823/Eucgr.F02506/Eucgr.F03161/Eucgr.H03385/Eucgr.H03642/Eucgr.J00008/Eucgr.J00327/Eucgr.J01749/Eucgr.J01952/Eucgr.K00768	15
GO:0009890	negative regulation of biosynthetic process	BP	15/1519	47/9326	0.00596703	0.0303813	Eucgr.A02083/Eucgr.B01356/Eucgr.B02503/Eucgr.B03381/Eucgr.B03561/Eucgr.C01809/Eucgr.C03688/Eucgr.D00483/Eucgr.E03350/Eucgr.F01177/Eucgr.F02571/Eucgr.G00556/Eucgr.G02360/Eucgr.I00536/Eucgr.K02861	15
GO:0040007	growth	BP	26/1519	98/9326	0.00648227	0.0326498	Eucgr.A00190/Eucgr.B00609/Eucgr.B00628/Eucgr.B02470/Eucgr.B02478/Eucgr.B03196/Eucgr.C00633/Eucgr.C02815/Eucgr.C04398/Eucgr.D00052/Eucgr.D00310/Eucgr.D00483/Eucgr.F01498/Eucgr.F03001/Eucgr.G03219/Eucgr.H00823/Eucgr.H04632/Eucgr.I00378/Eucgr.I01475/Eucgr.I02068/Eucgr.I02503/Eucgr.J00923/Eucgr.J01392/Eucgr.J02293/Eucgr.K01213/Eucgr.K03590	26
GO:0009630	gravitropism	BP	8/1519	19/9326	0.00678918	0.0333005	Eucgr.B00238/Eucgr.B01356/Eucgr.B02999/Eucgr.C04138/Eucgr.G01779/Eucgr.K02348/Eucgr.K02431/Eucgr.L03513	8
GO:0009396	folic acid-containing compound biosynthetic process	BP	6/1519	9326-12-01	0.00702118	0.0340816	Eucgr.A02294/Eucgr.B02610/Eucgr.F01594/Eucgr.G02823/Eucgr.J02122/Eucgr.K03460	6
GO:0022411	cellular component disassembly	BP	10/1519	27/9326	0.00747346	0.0343208	Eucgr.B01462/Eucgr.G00004/Eucgr.G02350/Eucgr.H00823/Eucgr.I01159/Eucgr.I01561/Eucgr.I01663/Eucgr.J00097/Eucgr.K03157/Eucgr.K03590	10
GO:0004386	helicase activity	MF	55/1736	130/10610	1.63441e-12	7.08816e-10	Eucgr.A00214/Eucgr.A01177/Eucgr.B00242/Eucgr.B00583/Eucgr.B01028/Eucgr.B01360/Eucgr.B02279/Eucgr.B02625/Eucgr.B03621/Eucgr.C00066/Eucgr.C00405/Eucgr.C00406/Eucgr.C02886/Eucgr.C03292/Eucgr.D00002/Eucgr.D00296/Eucgr.D01365/Eucgr.D01628/Eucgr.D02270/Eucgr.D02305/Eucgr.D02653/Eucgr.E00064/Eucgr.E00567/Eucgr.E00638/Eucgr.E02391/Eucgr.F01600/Eucgr.F03013/Eucgr.F03572/Eucgr.F03979/Eucgr.G00345/Eucgr.G00…	55
GO:0003723	RNA binding	MF	112/1736	414/10610	1.35169e-08	2.93103e-06	Eucgr.A00093/Eucgr.A00286/Eucgr.A00608/Eucgr.A00913/Eucgr.A01322/Eucgr.A01411/Eucgr.A01591/Eucgr.A02139/Eucgr.A02507/Eucgr.A02510/Eucgr.B00129/Eucgr.B00614/Eucgr.B01310/Eucgr.B01418/Eucgr.B01428/Eucgr.B01462/Eucgr.B02279/Eucgr.B02314/Eucgr.B02454/Eucgr.B02495/Eucgr.B03594/Eucgr.B03714/Eucgr.B03733/Eucgr.B03826/Eucgr.B04011/Eucgr.C00066/Eucgr.C00155/Eucgr.C00406/Eucgr.C00625/Eucgr.C00628/Eucgr.C00…	112
GO:0140097	catalytic activity, acting on DNA	MF	44/1736	122/10610	9.16151e-08	1.3244e-05	Eucgr.A01754/Eucgr.A02236/Eucgr.B00242/Eucgr.B01945/Eucgr.B02615/Eucgr.B03662/Eucgr.B03882/Eucgr.C00405/Eucgr.C02886/Eucgr.C03174/Eucgr.D00002/Eucgr.D00296/Eucgr.D00367/Eucgr.D00435/Eucgr.D01139/Eucgr.D01628/Eucgr.D02616/Eucgr.E00349/Eucgr.E00638/Eucgr.E02391/Eucgr.F01600/Eucgr.F03013/Eucgr.F03572/Eucgr.F04135/Eucgr.G00562/Eucgr.G02569/Eucgr.H00025/Eucgr.H01043/Eucgr.H01157/Eucgr.H01340/Eucgr.H02…	44
GO:0140098	catalytic activity, acting on RNA	MF	69/1736	233/10610	2.39499e-07	2.59667e-05	Eucgr.A00214/Eucgr.A00956/Eucgr.A01054/Eucgr.A02322/Eucgr.A02496/Eucgr.B01028/Eucgr.B01310/Eucgr.B01360/Eucgr.B01555/Eucgr.B01628/Eucgr.B02279/Eucgr.B02467/Eucgr.B03621/Eucgr.C00066/Eucgr.C00069/Eucgr.C00406/Eucgr.C01077/Eucgr.C02511/Eucgr.C03173/Eucgr.C03292/Eucgr.C04030/Eucgr.D00282/Eucgr.D01365/Eucgr.D01689/Eucgr.D01929/Eucgr.D02586/Eucgr.D02653/Eucgr.E00064/Eucgr.E00567/Eucgr.E00854/Eucgr.E01…	69
GO:0051020	GTPase binding	MF	19/1736	43/10610	1.57153e-05	0.000973639	Eucgr.A00035/Eucgr.A00473/Eucgr.A00543/Eucgr.A00600/Eucgr.A02966/Eucgr.B03196/Eucgr.C00756/Eucgr.E01037/Eucgr.F03709/Eucgr.G01904/Eucgr.G03244/Eucgr.H03367/Eucgr.H04107/Eucgr.H04230/Eucgr.I01475/Eucgr.I01543/Eucgr.I02730/Eucgr.J01771/Eucgr.K02348	19
GO:0004519	endonuclease activity	MF	25/1736	70/10610	6.46709e-05	0.00350585	Eucgr.A02087/Eucgr.A02322/Eucgr.A02496/Eucgr.C00406/Eucgr.C03173/Eucgr.C04030/Eucgr.D00696/Eucgr.D01139/Eucgr.D02586/Eucgr.D02653/Eucgr.E00349/Eucgr.F01076/Eucgr.F03545/Eucgr.H00025/Eucgr.H01340/Eucgr.I00435/Eucgr.I01829/Eucgr.I01834/Eucgr.J00844/Eucgr.J01260/Eucgr.J02177/Eucgr.J02950/Eucgr.K00458/Eucgr.K01860/Eucgr.K02481	25
GO:0008565	protein transporter activity	MF	18/1736	46/10610	0.000179096	0.00624855	Eucgr.A00001/Eucgr.A00543/Eucgr.A00600/Eucgr.A00607/Eucgr.B00583/Eucgr.B03952/Eucgr.C00951/Eucgr.C01579/Eucgr.F03709/Eucgr.G01904/Eucgr.H04107/Eucgr.I02730/Eucgr.J00415/Eucgr.J01771/Eucgr.K00283/Eucgr.K00411/Eucgr.K02232/Eucgr.K03215	18
GO:0016874	ligase activity	MF	61/1736	243/10610	0.000276851	0.00857615	Eucgr.A00261/Eucgr.A00643/Eucgr.A00956/Eucgr.A01178/Eucgr.A01456/Eucgr.A01617/Eucgr.A02294/Eucgr.B00369/Eucgr.B01310/Eucgr.B01495/Eucgr.B01628/Eucgr.B02467/Eucgr.B02478/Eucgr.B02610/Eucgr.B02769/Eucgr.B03943/Eucgr.C01033/Eucgr.C01814/Eucgr.D01840/Eucgr.D02624/Eucgr.E01025/Eucgr.E01106/Eucgr.E03926/Eucgr.F00711/Eucgr.F02042/Eucgr.F02160/Eucgr.F03261/Eucgr.F04354/Eucgr.F04382/Eucgr.F04425/Eucgr.G01…	61
GO:0042802	identical protein binding	MF	22/1736	65/10610	0.000419767	0.0113779	Eucgr.B00015/Eucgr.B01356/Eucgr.B03196/Eucgr.B03662/Eucgr.C02815/Eucgr.D01044/Eucgr.D02251/Eucgr.E01713/Eucgr.E02954/Eucgr.F03510/Eucgr.F04303/Eucgr.F04428/Eucgr.G01732/Eucgr.G02360/Eucgr.G02967/Eucgr.I02503/Eucgr.I02694/Eucgr.J02086/Eucgr.J02838/Eucgr.K00727/Eucgr.K00737/Eucgr.K03574	22
GO:0003697	single-stranded DNA binding	MF	9/1736	17/10610	0.00056955	0.0122582	Eucgr.B00672/Eucgr.D01628/Eucgr.E00349/Eucgr.H00025/Eucgr.I00435/Eucgr.I01829/Eucgr.J00844/Eucgr.J01999/Eucgr.J02948	9
GO:0016779	nucleotidyltransferase activity	MF	36/1736	136/10610	0.00174957	0.0291831	Eucgr.A01054/Eucgr.B01945/Eucgr.B02538/Eucgr.B03882/Eucgr.C00069/Eucgr.C02511/Eucgr.C02886/Eucgr.D00343/Eucgr.D00435/Eucgr.D01929/Eucgr.D02494/Eucgr.E00854/Eucgr.E01577/Eucgr.E03445/Eucgr.E03926/Eucgr.F00711/Eucgr.F01119/Eucgr.F02088/Eucgr.F03540/Eucgr.F04135/Eucgr.G00853/Eucgr.G01370/Eucgr.G02092/Eucgr.H00421/Eucgr.I02304/Eucgr.I02582/Eucgr.J00614/Eucgr.J01999/Eucgr.J02108/Eucgr.K00171/Eucgr.K01…	36
GO:0019200	carbohydrate kinase activity	MF	12/1736	31/10610	0.00236438	0.0379775	Eucgr.A02848/Eucgr.A02851/Eucgr.C02197/Eucgr.F00471/Eucgr.F01647/Eucgr.F01823/Eucgr.F02835/Eucgr.H00494/Eucgr.H04065/Eucgr.I01312/Eucgr.J01899/Eucgr.K00768	12
GO:0016891	endoribonuclease activity, producing 5'-phosphomonoesters	MF	9/1736	20/10610	0.00246653	0.0382034	Eucgr.C00406/Eucgr.C03173/Eucgr.C04030/Eucgr.D02586/Eucgr.D02653/Eucgr.F03545/Eucgr.I01834/Eucgr.J02177/Eucgr.J02950	9
GO:0044428	nuclear part	CC	120/1429	400/8542	1.0825e-11	1.82315e-09	Eucgr.A00286/Eucgr.A00543/Eucgr.A00600/Eucgr.A01374/Eucgr.A01411/Eucgr.A01754/Eucgr.A02139/Eucgr.A02322/Eucgr.A02507/Eucgr.A02936/Eucgr.A02992/Eucgr.B00394/Eucgr.B00544/Eucgr.B00704/Eucgr.B00853/Eucgr.B01356/Eucgr.B01428/Eucgr.B01452/Eucgr.B01555/Eucgr.B01556/Eucgr.B02119/Eucgr.B02434/Eucgr.B03381/Eucgr.B03561/Eucgr.B03882/Eucgr.B04011/Eucgr.C00066/Eucgr.C00069/Eucgr.C00155/Eucgr.C00405/Eucgr.C00…	120
GO:0031974	membrane-enclosed lumen	CC	92/1429	322/8542	4.39074e-08	1.17644e-06	Eucgr.A00600/Eucgr.A00913/Eucgr.A01374/Eucgr.A01411/Eucgr.A01754/Eucgr.A02139/Eucgr.A02507/Eucgr.A02936/Eucgr.A02992/Eucgr.B00704/Eucgr.B00853/Eucgr.B01112/Eucgr.B01356/Eucgr.B01452/Eucgr.B01556/Eucgr.B02119/Eucgr.B02434/Eucgr.B03381/Eucgr.B03561/Eucgr.B03882/Eucgr.C00066/Eucgr.C00069/Eucgr.C00480/Eucgr.C00824/Eucgr.C01077/Eucgr.C01159/Eucgr.C01716/Eucgr.C02521/Eucgr.C03174/Eucgr.C03688/Eucgr.D00…	92
GO:0043233	organelle lumen	CC	92/1429	322/8542	4.39074e-08	1.17644e-06	Eucgr.A00600/Eucgr.A00913/Eucgr.A01374/Eucgr.A01411/Eucgr.A01754/Eucgr.A02139/Eucgr.A02507/Eucgr.A02936/Eucgr.A02992/Eucgr.B00704/Eucgr.B00853/Eucgr.B01112/Eucgr.B01356/Eucgr.B01452/Eucgr.B01556/Eucgr.B02119/Eucgr.B02434/Eucgr.B03381/Eucgr.B03561/Eucgr.B03882/Eucgr.C00066/Eucgr.C00069/Eucgr.C00480/Eucgr.C00824/Eucgr.C01077/Eucgr.C01159/Eucgr.C01716/Eucgr.C02521/Eucgr.C03174/Eucgr.C03688/Eucgr.D00…	92
GO:0098588	bounding membrane of organelle	CC	83/1429	282/8542	4.88959e-08	1.17644e-06	Eucgr.A00254/Eucgr.A00509/Eucgr.A00534/Eucgr.A01050/Eucgr.A01129/Eucgr.A02017/Eucgr.A02776/Eucgr.A02778/Eucgr.B00015/Eucgr.B00173/Eucgr.B00317/Eucgr.B00481/Eucgr.B00707/Eucgr.B00717/Eucgr.B00855/Eucgr.B01990/Eucgr.B02594/Eucgr.B02887/Eucgr.B03069/Eucgr.B03390/Eucgr.C00132/Eucgr.C00739/Eucgr.C01004/Eucgr.C01277/Eucgr.C04138/Eucgr.D00483/Eucgr.D01026/Eucgr.D01835/Eucgr.D02081/Eucgr.D02156/Eucgr.D02…	83
GO:0030117	membrane coat	CC	19/1429	33/8542	1.19936e-07	2.01997e-06	Eucgr.A00509/Eucgr.B02594/Eucgr.B03952/Eucgr.C01579/Eucgr.D00483/Eucgr.D01026/Eucgr.F03011/Eucgr.F03442/Eucgr.G00444/Eucgr.G01708/Eucgr.G01711/Eucgr.G01717/Eucgr.G03075/Eucgr.H03169/Eucgr.J00193/Eucgr.J00415/Eucgr.J03008/Eucgr.K00564/Eucgr.K02232	19
GO:0048475	coated membrane	CC	19/1429	33/8542	1.19936e-07	2.01997e-06	Eucgr.A00509/Eucgr.B02594/Eucgr.B03952/Eucgr.C01579/Eucgr.D00483/Eucgr.D01026/Eucgr.F03011/Eucgr.F03442/Eucgr.G00444/Eucgr.G01708/Eucgr.G01711/Eucgr.G01717/Eucgr.G03075/Eucgr.H03169/Eucgr.J00193/Eucgr.J00415/Eucgr.J03008/Eucgr.K00564/Eucgr.K02232	19
GO:0097708	intracellular vesicle	CC	52/1429	157/8542	3.1187e-07	3.75182e-06	Eucgr.A00509/Eucgr.A00913/Eucgr.A01050/Eucgr.A02017/Eucgr.A02575/Eucgr.A02776/Eucgr.B00481/Eucgr.B00707/Eucgr.B02594/Eucgr.B03053/Eucgr.B03196/Eucgr.B04005/Eucgr.C02726/Eucgr.C04138/Eucgr.C04398/Eucgr.D00196/Eucgr.D00483/Eucgr.D01026/Eucgr.D01835/Eucgr.D02301/Eucgr.D02473/Eucgr.E01240/Eucgr.F01568/Eucgr.F02737/Eucgr.F03341/Eucgr.F03682/Eucgr.F04117/Eucgr.F04286/Eucgr.G00444/Eucgr.G01708/Eucgr.G01…	52
GO:0031982	vesicle	CC	52/1429	158/8542	3.90814e-07	3.90537e-06	Eucgr.A00509/Eucgr.A00913/Eucgr.A01050/Eucgr.A02017/Eucgr.A02575/Eucgr.A02776/Eucgr.B00481/Eucgr.B00707/Eucgr.B02594/Eucgr.B03053/Eucgr.B03196/Eucgr.B04005/Eucgr.C02726/Eucgr.C04138/Eucgr.C04398/Eucgr.D00196/Eucgr.D00483/Eucgr.D01026/Eucgr.D01835/Eucgr.D02301/Eucgr.D02473/Eucgr.E01240/Eucgr.F01568/Eucgr.F02737/Eucgr.F03341/Eucgr.F03682/Eucgr.F04117/Eucgr.F04286/Eucgr.G00444/Eucgr.G01708/Eucgr.G01…	52
GO:0098805	whole membrane	CC	66/1429	229/8542	2.62481e-06	2.21036e-05	Eucgr.A00509/Eucgr.A00534/Eucgr.A01050/Eucgr.A01129/Eucgr.A02017/Eucgr.A02776/Eucgr.A02778/Eucgr.B00015/Eucgr.B00173/Eucgr.B00317/Eucgr.B00481/Eucgr.B00717/Eucgr.B00855/Eucgr.B01990/Eucgr.B02594/Eucgr.C00132/Eucgr.C00241/Eucgr.C00739/Eucgr.C01277/Eucgr.C04138/Eucgr.D00483/Eucgr.D01026/Eucgr.D01835/Eucgr.D02156/Eucgr.D02301/Eucgr.E00053/Eucgr.E00189/Eucgr.E01240/Eucgr.E02009/Eucgr.E03356/Eucgr.E04…	66
GO:1902494	catalytic complex	CC	83/1429	327/8542	3.29146e-05	0.000251978	Eucgr.A00016/Eucgr.A00261/Eucgr.A02290/Eucgr.A02322/Eucgr.B00544/Eucgr.B00704/Eucgr.B00853/Eucgr.B01476/Eucgr.B01556/Eucgr.B01945/Eucgr.B02434/Eucgr.B02769/Eucgr.B03381/Eucgr.B03640/Eucgr.B03882/Eucgr.C00069/Eucgr.C00155/Eucgr.C00241/Eucgr.C00824/Eucgr.C01428/Eucgr.C01723/Eucgr.C02521/Eucgr.C03168/Eucgr.C04084/Eucgr.D00282/Eucgr.D00435/Eucgr.D02586/Eucgr.E00258/Eucgr.E02414/Eucgr.F00252/Eucgr.F01…	83
GO:0005694	chromosome	CC	38/1429	130/8542	0.000247737	0.00122718	Eucgr.A01107/Eucgr.A01754/Eucgr.A02236/Eucgr.A02895/Eucgr.A02992/Eucgr.B00704/Eucgr.B01452/Eucgr.B01550/Eucgr.B02434/Eucgr.B03381/Eucgr.B03561/Eucgr.B03882/Eucgr.C03174/Eucgr.C03688/Eucgr.D00435/Eucgr.D01236/Eucgr.E00409/Eucgr.E00854/Eucgr.F01076/Eucgr.F03008/Eucgr.G00562/Eucgr.G01927/Eucgr.H00025/Eucgr.H00037/Eucgr.H01928/Eucgr.H02905/Eucgr.H03855/Eucgr.H04558/Eucgr.H04963/Eucgr.I00435/Eucgr.I01…	38
GO:0031975	envelope	CC	77/1429	327/8542	0.000776042	0.00318785	Eucgr.A00509/Eucgr.A00534/Eucgr.A00543/Eucgr.A00600/Eucgr.A00607/Eucgr.A00911/Eucgr.A00993/Eucgr.A02836/Eucgr.B00021/Eucgr.B01556/Eucgr.B01990/Eucgr.B02421/Eucgr.B02495/Eucgr.B02532/Eucgr.B02721/Eucgr.C00132/Eucgr.C00142/Eucgr.C00667/Eucgr.C02103/Eucgr.C03817/Eucgr.C04218/Eucgr.C04235/Eucgr.D00185/Eucgr.E00189/Eucgr.E01449/Eucgr.E02954/Eucgr.E03356/Eucgr.F00477/Eucgr.F01365/Eucgr.F02948/Eucgr.F03…	77
GO:0042175	nuclear outer membrane-endoplasmic reticulum membrane network	CC	32/1429	110/8542	0.000811824	0.00325543	Eucgr.A00001/Eucgr.A00285/Eucgr.A02290/Eucgr.A02776/Eucgr.A02967/Eucgr.B00238/Eucgr.B01001/Eucgr.B03069/Eucgr.B03480/Eucgr.C00633/Eucgr.C00745/Eucgr.C03168/Eucgr.D00052/Eucgr.D00750/Eucgr.D01835/Eucgr.D02301/Eucgr.D02473/Eucgr.E00370/Eucgr.F03682/Eucgr.G01979/Eucgr.G02477/Eucgr.G02933/Eucgr.G03076/Eucgr.H02550/Eucgr.H02617/Eucgr.J00522/Eucgr.J02078/Eucgr.J02086/Eucgr.K00091/Eucgr.K01672/Eucgr.K01…	32
GO:0098562	cytoplasmic side of membrane	CC	7/1429	8542-12-01	0.00131082	0.0050175	Eucgr.A02776/Eucgr.B01476/Eucgr.C03168/Eucgr.D01835/Eucgr.D02301/Eucgr.H02617/Eucgr.I02026	7
GO:0019898	extrinsic component of membrane	CC	15/1429	41/8542	0.00173424	0.00638668	Eucgr.B01476/Eucgr.B04005/Eucgr.C00100/Eucgr.C03168/Eucgr.D01986/Eucgr.E01352/Eucgr.G02107/Eucgr.G02908/Eucgr.H00086/Eucgr.H02571/Eucgr.I01159/Eucgr.I02026/Eucgr.J00097/Eucgr.K00929/Eucgr.K02348	15
GO:0019012	virion	CC	12/1429	34/8542	0.00683136	0.0166746	Eucgr.B00583/Eucgr.B01475/Eucgr.B04011/Eucgr.C00155/Eucgr.C04084/Eucgr.C04091/Eucgr.D01204/Eucgr.G00444/Eucgr.G02908/Eucgr.H00136/Eucgr.H01111/Eucgr.K01365	12
GO:0044423	virion part	CC	12/1429	34/8542	0.00683136	0.0166746	Eucgr.B00583/Eucgr.B01475/Eucgr.B04011/Eucgr.C00155/Eucgr.C04084/Eucgr.C04091/Eucgr.D01204/Eucgr.G00444/Eucgr.G02908/Eucgr.H00136/Eucgr.H01111/Eucgr.K01365	12
GO:0005938	cell cortex	CC	10/1429	27/8542	0.00903254	0.0208558	Eucgr.A00473/Eucgr.D00655/Eucgr.E02482/Eucgr.F04242/Eucgr.G02511/Eucgr.G03261/Eucgr.H00823/Eucgr.J00280/Eucgr.K02187/Eucgr.K03590	10
GO:0099568	cytoplasmic region	CC	10/1429	27/8542	0.00903254	0.0208558	Eucgr.A00473/Eucgr.D00655/Eucgr.E02482/Eucgr.F04242/Eucgr.G02511/Eucgr.G03261/Eucgr.H00823/Eucgr.J00280/Eucgr.K02187/Eucgr.K03590	10

## Sheet: Exclusive_enric_terms_by_tissue
Exclusive of adult leaves
ID	Description	Ontology
GO:0046488	phosphatidylinositol metabolic process	BP
GO:0048585	negative regulation of response to stimulus	BP
GO:0051188	cofactor biosynthetic process	BP
GO:0006457	protein folding	BP
GO:0072521	purine-containing compound metabolic process	BP
GO:0051049	regulation of transport	BP
GO:0007131	reciprocal meiotic recombination	BP
GO:0051241	negative regulation of multicellular organismal process	BP
GO:0031668	cellular response to extracellular stimulus	BP
GO:0019013	viral nucleocapsid	CC
Exclusive of juvenile leaves
ID	Description	Ontology
GO:0022402	cell cycle process	BP
GO:0007275	multicellular organism development	BP
GO:0010033	response to organic substance	BP
GO:0009648	photoperiodism	BP
GO:0048869	cellular developmental process	BP
GO:0071310	cellular response to organic substance	BP
GO:0051254	positive regulation of RNA metabolic process	BP
GO:0031325	positive regulation of cellular metabolic process	BP
GO:0044270	cellular nitrogen compound catabolic process	BP
GO:0042398	cellular modified amino acid biosynthetic process	BP
GO:0042559	pteridine-containing compound biosynthetic process	BP
GO:0071902	positive regulation of protein serine/threonine kinase activity	BP
GO:0001101	response to acid chemical	BP
GO:0017056	structural constituent of nuclear pore	MF
GO:0016881	acid-amino acid ligase activity	MF
GO:0031410	cytoplasmic vesicle	CC
GO:1990234	transferase complex	CC
GO:1990904	ribonucleoprotein complex	CC
GO:0000428	DNA-directed RNA polymerase complex	CC
GO:0030880	RNA polymerase complex	CC
GO:0099513	polymeric cytoskeletal fiber	CC
GO:0099080	supramolecular complex	CC
GO:0099081	supramolecular polymer	CC
Exclusive of xylem
ID	Description	Ontology
GO:0071705	nitrogen compound transport	BP
GO:0048573	photoperiodism, flowering	BP
GO:0009787	regulation of abscisic acid-activated signaling pathway	BP
GO:0009755	hormone-mediated signaling pathway	BP
GO:0006413	translational initiation	BP
GO:0000045	autophagosome assembly	BP
GO:0097306	cellular response to alcohol	BP
GO:0019200	carbohydrate kinase activity	MF
